# Supplementary material
Source: PubMed Central journal article supplement (PMC4875420)
Supplement: 13238_2012_14_MOESM2_ESM.pdf [file 13238_2012_14_MOESM2_ESM.pdf]

**Table S1** Summarization of gene expression samples and groups.

| Index | Sample    | Group | Sample description                |
|-------|-----------|-------|-----------------------------------|
| 1     | GSM241889 | 7     | GC Oligodendrocytes (P16)         |
| 2     | GSM241890 | 8     | MOG Myelin Oligodendrocytes (P7)  |
| 3     | GSM241891 | 7     | GC Oligodendrocytes (P16)         |
| 4     | GSM241892 | 7     | GC Oligodendrocytes (P16)         |
| 5     | GSM241893 | 8     | MOG Myelin Oligodendrocytes (P16) |
| 6     | GSM241894 | 8     | MOG Myelin Oligodendrocytes (P16) |
| 7     | GSM241895 | 6     | PDGFRa OPCs (P16)                 |
| 8     | GSM241896 | 5     | Neurons (P16)                     |
| 9     | GSM241897 | 5     | Neurons (P16)                     |
| 10    | GSM241898 | 2     | Astrocytes (P7)                   |
| 11    | GSM241899 | 4     | Neurons (P7)                      |
| 12    | GSM241900 | 2     | Astrocytes (P7)                   |
| 13    | GSM241901 | 4     | Neurons (P7)                      |
| 14    | GSM241902 | 2     | Astrocytes (P8)                   |
| 15    | GSM241903 | 4     | Neurons (P8)                      |
| 16    | GSM241904 | 5     | Neurons (P16)                     |
| 17    | GSM241908 | 5     | Neurons (P26)                     |
| 18    | GSM241912 | 3     | Astrocytes (P17)                  |
| 19    | GSM241914 | 3     | Astrocytes (P17)                  |
| 20    | GSM241915 | 3     | Astrocytes (P17)                  |
| 21    | GSM241916 | 6     | PDGFRa OPCs (P17)                 |
| 22    | GSM241917 | 7     | GC Oligodendrocytes (P17)         |
| 23    | GSM241918 | 8     | MOG Myelin Oligodendrocytes (P17) |
| 24    | GSM241919 | 3     | Astrocytes (P30)                  |
| 25    | GSM241920 | 2     | Astrocytes (P1)                   |
| 26    | GSM241922 | 4     | Neurons (P7)                      |
| 27    | GSM241925 | 3     | Astrocytes (P17)                  |
| 28    | GSM241926 | 3     | Astrocytes (P17)                  |
| 29    | GSM314045 | 1     | NSC (OG2/Rosa26)                  |
| 30    | GSM314046 | 1     | NSC (OG2/Rosa26)                  |
| 31    | GSM314047 | 1     | NSC (OG2/Rosa26)                  |
| 32    | GSM314048 | 1     | NSC (OG2/Rosa26)                  |
| 33    | GSM457631 | 1     | NSC (FVB/N)                       |
| 34    | GSM457632 | 1     | NSC (FVB/N)                       |
| 35    | GSM457635 | 1     | NSC (FVB/N)                       |
| 36    | GSM457636 | 1     | NSC (FVB/N)                       |

P: Postnatal age day
