# Supplementary material
Source: PubMed Central journal article supplement (PMC4875420)
Supplement: 13238_2012_14_MOESM3_ESM.pdf [file 13238_2012_14_MOESM3_ESM.pdf]

**Table S2** List of NSCs, astrocytes, OLs and neurons specifically expressed genes.

| Index | NSC                   | Astrocyte     | OlS           | Neurons       |
|-------|-----------------------|---------------|---------------|---------------|
| 1     | 1700106N22RIK         | 100041799     | 1500004A13RIK | 1100001E04RIK |
| 2     | 2610021K21RIK         | 1700027L20RIK | 1700001P01RIK | 1110006E14RIK |
| 3     | 2700049P18RIK         | 1810010K12RIK | 1700010I14RIK | 1110059M19RIK |
| 4     | 2810408I11RIK         | 2410025L10RIK | 1700012A16RIK | 1110064A23RIK |
| 5     | 4632434I11RIK         | 2900019G14RIK | 2010317E24RIK | 1500001A10RIK |
| 6     | 4922501L14RIK         | 2900052N01RIK | 2310006M14RIK | 1500035N22RIK |
| 7     | 4930422N03RIK         | 328235        | 2310014L17RIK | 1700001L19RIK |
| 8     | 4930427A07RIK         | 4833413G10RIK | 2310035C23RIK | 1700054N08RIK |
| 9     | 4933411K20RIK         | 4921517L17RIK | 2310079F09RIK | 2210008F06RIK |
| 10    | 4933432K03RIK         | 4930525F21RIK | 2600010E01RIK | 2310003H01RIK |
| 11    | 6230416J20RIK         | 4930534B04RIK | 2610020H08RIK | 2610109H07RIK |
| 12    | 6530418L21RIK         | 4930578N16RIK | 2610034E01RIK | 2810032G03RIK |
| 13    | 6720460F02RIK         | 4933407E14RIK | 2610035D17RIK | 2900046L07RIK |
| 14    | 9330118A15RIK         | 4933407L21RIK | 2610204M08RIK | 2900055J20RIK |
| 15    | A430071A18RIK         | 4933416E14RIK | 2700045P11RIK | 2900079G21RIK |
| 16    | A930024E05RIK         | 4933431E20RIK | 2700046A07RIK | 3110039M20RIK |
| 17    | AA763515              | 5730471H19RIK | 2810011L19RIK | 3110047P20RIK |
| 18    | AAK1                  | 5930412G12RIK | 2900018E21RIK | 4930414L22RIK |
| 19    | ABCC12                | 6030446N20RIK | 2900083I11RIK | 4930429B21RIK |
| 20    | ADAM12                | 9530025L08RIK | 3110007F17RIK | 4930538K18RIK |
| 21    | ADAMTS6               | 9630001P10RIK | 3110043A19RIK | 4931428F04RIK |
| 22    | ADAMTS7               | 9630005C17RIK | 4921505C17RIK | 4933409K07RIK |
| 23    | ADCYAP1R1             | A330048O09RIK | 4930402H24RIK | 5033404E19RIK |
| 24    | AFFX-DapX-5_at        | A530079E22RIK | 4930406D14RIK | 5033421C21RIK |
| 25    | AFFX-LysX-5_at        | A730056A06RIK | 4930452G13RIK | 5033430I15RIK |
| 26    | AFFX-PheX-5_at        | A930001A20RIK | 4930570G19RIK | 5430405G05RIK |
| 27    | AFFX-r2-Bs-dap-5_at   | ACOT11        | 4932431H17RIK | 5730433K22RIK |
| 28    | AFFX-r2-Bs-lys-5_at   | ADCYAP1R1     | 4932435O22RIK | 6330406O05RIK |
| 29    | AFFX-r2-Bs-thr-5_s_at | AGBL3         | 4933413G19RIK | 6330409D20RIK |
| 30    | AFFX-ThrX-5_at        | AI661167      | 5033423O07RIK | 6430500C12RIK |
| 31    | AHI1                  | AI848258      | 5430416G10RIK | 6430548M08RIK |
| 32    | AI506321              | AIFM3         | 5430435G22RIK | 6430598A04RIK |
| 33    | AI506816              | AKT2          | 5730492I20RIK | 9030425E11RIK |
| 34    | AI746468              | ALDOC         | 5830490A04RIK | 9130024F11RIK |
| 35    | ANO3                  | ARHGAP26      | 5930403N24RIK | 9330121K16RIK |
| 36    | APC                   | ARID5A        | 6330416G13RIK | 9930013L23RIK |
| 37    | ARMC9                 | ATP13A4       | 6330436F06RIK | A330008L17RIK |
| 38    | ASCL1                 | AV230440      | 6330512M04RIK | A430108G06RIK |
| 39    | ASPM                  | AV254043      | 6430514M23RIK | A830006F12RIK |
| 40    | ATN1                  | AV337396      | 669460        | A830010M20RIK |
| 41    | ATP5G2                | AV339935      | 6720483E21RIK | A830018L16RIK |

|    |               |               |               |               |
|----|---------------|---------------|---------------|---------------|
| 42 | ATP6V0A1      | AV348780      | 9130404D08RIK | A830021K08RIK |
| 43 | AU043080      | AW123117      | 9330154F10RIK | A830029E22RIK |
| 44 | AV164956      | B230311B06RIK | 9430076C15RIK | A930005I04RIK |
| 45 | AV228095      | BAALC         | 9530056K15RIK | A930025H08RIK |
| 46 | AV254764      | BB016042      | 9530059O14RIK | A930033H14RIK |
| 47 | AV323315      | BB076411      | 9530066K23RIK | AAK1          |
| 48 | AW545941      | BB083283      | 9630013A20RIK | ACTL6B        |
| 49 | BB053540      | BB083829      | 9630021D06RIK | ADAMTS18      |
| 50 | BB130444      | BB084593      | A130022J21RIK | ADCY1         |
| 51 | BB304331      | BB102769      | A230001M10RIK | ADCYAP1       |
| 52 | BB337104      | BB175647      | A230009B12RIK | ADD2          |
| 53 | BB340127      | BB206733      | A230069A22RIK | AF529169      |
| 54 | BB444561      | BB216686      | A230106M20RIK | AGAP3         |
| 55 | BB463474      | BB233366      | A330068G13RIK | AGBL4         |
| 56 | BB527979      | BB266350      | A730017C20RIK | AI452177      |
| 57 | BB531021      | BB269445      | A830091E24    | AI836003      |
| 58 | BC023969      | BB283577      | A930009A15RIK | AI836737      |
| 59 | BE953578      | BB306828      | AA177898      | AI839625      |
| 60 | BG070088      | BB373481      | AA408296      | AI847427      |
| 61 | BM114403      | BB431289      | AA855988      | AI847963      |
| 62 | BM202761      | BB451946      | ABCG1         | AI852373      |
| 63 | BM224051      | BB522140      | ABL1          | AJAP1         |
| 64 | BM235636      | BB529013      | ACAN          | AK014085      |
| 65 | C530044C16RIK | BB540658      | ACCN4         | AK020721      |
| 66 | CALR3         | BB544806      | ACO1          | AK5           |
| 67 | CAMKK2        | BB660139      | ADAM1A        | AMIGO1        |
| 68 | CAND1         | BC019134      | ADAMTS2       | ANKRD12       |
| 69 | CBX5          | BC025871      | ADAMTS4       | ANKRD13D      |
| 70 | CCDC38        | BE456323      | ADAMTSL1      | ANKRD34A      |
| 71 | CCDC77        | BE864022      | ADAMTSL3      | ANKRD42       |
| 72 | CCNB1         | BE952586      | ADCY5         | APCDD1        |
| 73 | CCT4          | BE993099      | AGBL5         | APOLD1        |
| 74 | CD109         | BF465664      | AI120166      | ARHGEF4       |
| 75 | CDC25C        | BG063470      | AI173473      | ASPH          |
| 76 | CDC7          | BG065039      | AI429214      | ASPHD1        |
| 77 | CDK5RAP2      | BG067912      | AI506883      | ATG9B         |
| 78 | CDR2L         | BG069486      | AI644595      | ATP13A5       |
| 79 | CENPF         | BG071205      | AI835735      | ATP2C1        |
| 80 | CENPM         | BG075346      | AI839852      | ATXN10        |
| 81 | CEP55         | BM117570      | AK012373      | AU067700      |
| 82 | CEP70         | BM119078      | ALK           | AU067739      |
| 83 | CEP78         | BM203324      | ANGPT4        | AV077281      |
| 84 | CREB5         | BM206839      | ANK3          | AV221520      |

|     |            |                    |               |               |
|-----|------------|--------------------|---------------|---------------|
| 85  | CRKL       | BM220188           | ANKRD11       | AV224430      |
| 86  | CSTF1      | BM898872           | ANKRD39       | AV269187      |
| 87  | D2ERTD750E | BMPR1B             | ANKS1B        | AV312620      |
| 88  | DCBLD2     | BRAF               | ANKS3         | AV327590      |
| 89  | DEP1       | C030005G22RIK      | ANLN          | AW048415      |
| 90  | DGKK       | C230035I16RIK      | APOD          | AW050081      |
| 91  | DHX33      | C77713             | ARHGAP22      | AW123022      |
| 92  | DHX38      | CABLES1            | ARHGEF10      | AW123395      |
| 93  | DLG5       | CAPS2              | ARSG          | AW125215      |
| 94  | DTL        | CCNB1IP1           | ATPGD1        | AW488931      |
| 95  | EIF2S1     | CML3               | AU021315      | AW489900      |
| 96  | ERCC4      | CTSO               | AU042873      | AW491340      |
| 97  | ERCC6L     | CYBRD1             | AU067691      | AW492805      |
| 98  | ETAA1      | CYCS               | AV074978      | AW494399      |
| 99  | ETV5       | D5BUC30E           | AV266023      | AW551984      |
| 100 | EXO1       | D630033O11RIK      | AV293250      | B230216G23RIK |
| 101 | EXOD1      | D6WSU116E          | AV317704      | B830017H08RIK |
| 102 | FAM110A    | D8ERTD56E          | AV323439      | BAIAP2        |
| 103 | FANCD2     | D9WSU90E           | AV328597      | BAIAP3        |
| 104 | FANCI      | DAAM2              | AV330588      | BB021606      |
| 105 | FBN2       | DBX2               | AV365231      | BB026411      |
| 106 | FOXM1      | DIO2               | AW048005      | BB083574      |
| 107 | FSCN1      | DMP1               | AW049021      | BB086117      |
| 108 | FZD3       | DNAIC1             | AW060425      | BB122340      |
| 109 | GALC       | E130014H10RIK      | AW120674      | BB129490      |
| 110 | GEMIN5     | EG544888           | AW123227      | BB129764      |
| 111 | GTSE1      | EG625121           | AW125035      | BB181834      |
| 112 | HEATR1     | ELMO2              | AW456291      | BB182944      |
| 113 | HEATR5B    | ENSMUSG00000053861 | AW489408      | BB252309      |
| 114 | HELLS      | FAM107A            | AW489857      | BB252728      |
| 115 | HIP1       | FAM167A            | AW492836      | BB267006      |
| 116 | HMGA2      | FAM20A             | AW494074      | BB268577      |
| 117 | HOXA1      | FGFBP3             | AW539049      | BB283819      |
| 118 | HRH1       | FGFR1              | AW544264      | BB303372      |
| 119 | HUS1       | FMN2               | AW546318      | BB306048      |
| 120 | IER5L      | FREM2              | AW548716      | BB308046      |
| 121 | ILF3       | FZD2               | AW551882      | BB312372      |
| 122 | INCENP     | G530011O06RIK      | AW556148      | BB314321      |
| 123 | INTS10     | GFAP               | B230204H03RIK | BB321110      |
| 124 | INTS5      | GJB6               | B3GALT5       | BB332542      |
| 125 | ITGB3BP    | GLI1               | B3GNT9        | BB354702      |
| 126 | JAM2       | GLI2               | BACE2         | BB357628      |
| 127 | KATNAL2    | GLI3               | BB024097      | BB360008      |

|     |          |                    |          |          |
|-----|----------|--------------------|----------|----------|
| 128 | KBTBD8   | GLT25D2            | BB025668 | BB363699 |
| 129 | KCNC1    | GLYCAM1            | BB027193 | BB369592 |
| 130 | KCND3    | GM266              | BB056087 | BB381263 |
| 131 | KIF20B   | GNAO1              | BB073651 | BB389250 |
| 132 | LFNG     | GPR50              | BB131938 | BB395376 |
| 133 | LMNB2    | GRIN2C             | BB175571 | BB395749 |
| 134 | LRP8     | GRK4               | BB185168 | BB417513 |
| 135 | LRRC4B   | H2-EA              | BB197117 | BB464198 |
| 136 | MARK1    | HAPLN1             | BB211758 | BB525237 |
| 137 | MASTL    | HHIPL1             | BB233495 | BB529019 |
| 138 | MATR3    | HIF3A              | BB237434 | BB729922 |
| 139 | MCM8     | HIVEP3             | BB251113 | BB751335 |
| 140 | MED1     | HS3ST3A1           | BB265030 | BC005764 |
| 141 | MEX3A    | ID4                | BB267954 | BC007180 |
| 142 | MIPOL1   | IGF2BP3            | BB283564 | BC021394 |
| 143 | MLF1IP   | IGSF1              | BB309408 | BC037034 |
| 144 | MPHOSPH9 | IL17RD             | BB314361 | BC059841 |
| 145 | MTAP2    | KCNE1L             | BB315012 | BE851943 |
| 146 | MTR      | LGI4               | BB335821 | BE943713 |
| 147 | MYBL1    | LIX1               | BB336546 | BE944943 |
| 148 | MYO10    | LOC100046982       | BB345595 | BE948255 |
| 149 | NASP     | LOC627626          | BB354954 | BE948992 |
| 150 | NAV2     | LPAR4              | BB367621 | BE955100 |
| 151 | NCAPD3   | LTBP1              | BB375376 | BE956787 |
| 152 | NCOR2    | LYPD6              | BB385094 | BE980582 |
| 153 | NETO2    | MIA1               | BB389461 | BE981420 |
| 154 | NKRF     | MMD2               | BB391093 | BE989942 |
| 155 | NOVA1    | MSI2               | BB392770 | BE996371 |
| 156 | NPAS3    | MSX1               | BB393194 | BF472737 |
| 157 | NPHP4    | MT1                | BB404534 | BG063310 |
| 158 | NPTX1    | NAT1               | BB427399 | BG069783 |
| 159 | NUP188   | NCAM1              | BB440983 | BG070831 |
| 160 | NUP205   | NHSL1              | BB453864 | BG071987 |
| 161 | NUSAP1   | NOTCH3             | BB462555 | BICD2    |
| 162 | OGG1     | NR2E1              | BB471595 | BM218863 |
| 163 | PA2G4    | NRP2               | BB481761 | BM938299 |
| 164 | PCDHB11  | NTRK2              | BB491630 | BM938335 |
| 165 | PEG10    | NTSR2              | BB520404 | BM939341 |
| 166 | PEG12    | NXN                | BB522668 | BM941510 |
| 167 | PGAP1    | OCIAD1             | BB534712 | BQ174216 |
| 168 | PHF6     | OTTMUSG00000002879 | BB538688 | BQ177195 |
| 169 | PIF1     | OTTMUSG00000003311 | BB560365 | BRUNOL6  |
| 170 | PIGN     | OTTMUSG00000010446 | BB667304 | BSN      |

|     |          |                   |          |               |
|-----|----------|-------------------|----------|---------------|
| 171 | PIGT     | P4HA3             | BB707145 | BTRC          |
| 172 | PLDN     | PAG1              | BB728649 | C030011L09RIK |
| 173 | POU3F4   | PAQR6             | BB735884 | C030017B01RIK |
| 174 | PPIH     | PAX6OS1           | BB750203 | C030019I05RIK |
| 175 | PPP1R14B | PDYN              | BB761583 | C130081A10RIK |
| 176 | PSRC1    | PDZD11            | BB787201 | C130092O11RIK |
| 177 | PVT1     | PLA2G3            | BB800733 | C230034O21RIK |
| 178 | RAB23    | PON2              | BB801162 | C230057M02RIK |
| 179 | RAB31    | PPP1R3G           | BB802543 | C230098O21RIK |
| 180 | RAD18    | PRDM16            | BB805891 | C77370        |
| 181 | RAD51C   | PREX2             | BC019943 | C78859        |
| 182 | RAD51L1  | PRRX2             | BC021394 | C80120        |
| 183 | RASL11A  | PTAR1             | BCAS1    | CABP1         |
| 184 | RCBTB2   | PTX3              | BE650754 | CACNA1B       |
| 185 | RCOR2    | RANBP3L           | BE852843 | CACNG2        |
| 186 | RG9MTD2  | RASSF10           | BE944618 | CACNG3        |
| 187 | RHOBTB3  | RMST              | BE945018 | CALCA         |
| 188 | RNF219   | RNASE10           | BE948900 | CAMKV         |
| 189 | RRP1B    | ROR2              | BE949437 | CBLN1         |
| 190 | RTEL1    | RPP14             | BE951087 | CBLN4         |
| 191 | SALL1    | SBNO2             | BE955043 | CCDC112       |
| 192 | SART3    | SLC14A2           | BE956710 | CCDC120       |
| 193 | SDC3     | SLC1A2            | BE979116 | CCDC65        |
| 194 | SEMA6D   | SLC2A10           | BE979956 | CCKBR         |
| 195 | SEPT2    | SLC39A12          | BE990881 | CDADC1        |
| 196 | SETDB1   | SLC7A11           | BF018283 | CDH7          |
| 197 | SF1      | SNCAIP            | BF019847 | CDH8          |
| 198 | SHC3     | SPATA3            | BF462741 | CDH9          |
| 199 | SKP2     | SPIRE1            | BF472513 | CDK5R1        |
| 200 | SMARCC1  | SYCP2             | BG060627 | CDK5R2        |
| 201 | SMC2     | TBC1D10A          | BG064130 | CDKL3         |
| 202 | SNCAIP   | TECTB             | BG067253 | CDKL4         |
| 203 | SORCS1   | TEKT4             | BG067408 | CEBPZ         |
| 204 | SOX11    | TLCD1             | BG070615 | CELSR3        |
| 205 | SOX3     | TNC               | BG071771 | CHN1          |
| 206 | SOX4     | TNFAIP2           | BG072567 | CHRM1         |
| 207 | SPDYA    | TOM1L1            | BG073826 | CHRNA5        |
| 208 | SPRY4    | TPBG              | BG076186 | CHRN2         |
| 209 | SRGAP2   | TPH2              | BG076361 | CIAPIN1       |
| 210 | SUPT16H  | TP53 (TRP53, P53) | BG076370 | CLSTN2        |
| 211 | SUV39H2  | TTYH1             | BI133499 | CLSTN3        |
| 212 | TAF1D    | USP53             | BI499715 | CMPK1         |
| 213 | TAF2     | WRNIP1            | BI689456 | CNIH3         |

|     |         |        |               |                    |
|-----|---------|--------|---------------|--------------------|
| 214 | TCERG1  | ZBTB37 | BI990622      | CNKSR2             |
| 215 | TEAD2   | ZFP467 | BIN1          | CNNM1              |
| 216 | TGIF2   |        | BM115174      | CNTNAP4            |
| 217 | THG1L   |        | BM117318      | COL19A1            |
| 218 | TLE4    |        | BM120182      | COL25A1            |
| 219 | TMEM138 |        | BM201500      | COPG2AS2           |
| 220 | TMEM48  |        | BM237609      | CPA2               |
| 221 | TROAP   |        | BM238649      | CPLX1              |
| 222 | TSGA14  |        | BM243133      | CPNE4              |
| 223 | TTF2    |        | BM246582      | CPNE5              |
| 224 | TTK     |        | BM934616      | CPNE7              |
| 225 | UTP23   |        | BM941356      | CPNE9              |
| 226 | VAV3    |        | BM942899      | CRH                |
| 227 | WDR35   |        | BQ030936      | CRHR1              |
| 228 | WDR62   |        | BQ175003      | CRTC1              |
| 229 | WNT7B   |        | BQ175871      | CSF2RA             |
| 230 | XKR5    |        | BQ176350      | CSRNP3             |
| 231 | YES1    |        | BRD8          | CXCL2              |
| 232 | ZBED3   |        | BTF3          | CYP4X1             |
| 233 | ZBTB12  |        | C030030A07RIK | D11BWG0517E        |
| 234 | ZBTB39  |        | C1QL1         | DBN1               |
| 235 | ZBTB7C  |        | C1QL2         | DBNDD1             |
| 236 | ZFP157  |        | C330006K01RIK | DGKG               |
| 237 | ZFP2    |        | C630004H02RIK | DKKL1              |
| 238 | ZFP354C |        | C630043F03RIK | DLGAP2             |
| 239 | ZFP40   |        | C76273        | DLX1               |
| 240 | ZFP451  |        | C77185        | DLX1AS             |
| 241 | ZFP69   |        | C79242        | DLX2               |
| 242 | ZIK1    |        | C80068        | DLX6OS1            |
| 243 |         |        | C86753        | DNM1               |
| 244 |         |        | CATSPER2      | DOC2A              |
| 245 |         |        | CCDC89        | DOK5               |
| 246 |         |        | CCL3          | DPYSL5             |
| 247 |         |        | CCL4          | E530001K10RIK      |
| 248 |         |        | CDGAP         | ECEL1              |
| 249 |         |        | CDH7          | EG245440           |
| 250 |         |        | CEP68         | EG628779           |
| 251 |         |        | CEP72         | EG636791           |
| 252 |         |        | CFL2          | EGR4               |
| 253 |         |        | CHST5         | ELMO1              |
| 254 |         |        | CLCC1         | EMX1               |
| 255 |         |        | CLDN11        | ENSMUSG00000058736 |
| 256 |         |        | CLDN14        | ENSMUSG00000074461 |

|     |  |  |               |         |
|-----|--|--|---------------|---------|
| 257 |  |  | CLGN          | EPHA10  |
| 258 |  |  | CNOT3         | EPHA3   |
| 259 |  |  | CNTN2         | EPHA4   |
| 260 |  |  | CNTN3         | EPHA6   |
| 261 |  |  | CNTN4         | EPHA7   |
| 262 |  |  | COL20A1       | EZH1    |
| 263 |  |  | COL24A1       | FAIM2   |
| 264 |  |  | COL9A2        | FAM110B |
| 265 |  |  | CSMD1         | FAM116B |
| 266 |  |  | CSPG4         | FAM123B |
| 267 |  |  | CTTNBP2       | FAM123C |
| 268 |  |  | CYB5D2        | FAM148C |
| 269 |  |  | CYFIP2        | FAM163B |
| 270 |  |  | D18ERTD653E   | FAM43B  |
| 271 |  |  | DACH2         | FANK1   |
| 272 |  |  | DDX43         | FBXL2   |
| 273 |  |  | DIS3L2        | FBXO41  |
| 274 |  |  | DLGAP1        | FCHO1   |
| 275 |  |  | DLL3          | FCHSD1  |
| 276 |  |  | DMRTB1        | FIBCD1  |
| 277 |  |  | DMRTC1A       | FOXD1   |
| 278 |  |  | DNM2          | FOXP2   |
| 279 |  |  | DOCK4         | FOXQ1   |
| 280 |  |  | DPP6          | FRMPD3  |
| 281 |  |  | DPP7          | FXYD7   |
| 282 |  |  | DSCAML1       | GABRA5  |
| 283 |  |  | DTX1          | GABRD   |
| 284 |  |  | DUSP9         | GAD2    |
| 285 |  |  | E130309F12RIK | GALNT9  |
| 286 |  |  | E230016M11RIK | GALNTL6 |
| 287 |  |  | E330034G19RIK | GLRA2   |
| 288 |  |  | E330037M01RIK | GM1060  |
| 289 |  |  | EBF4          | GM879   |
| 290 |  |  | ECE2          | GNAL    |
| 291 |  |  | EDIL3         | GOLGA7B |
| 292 |  |  | EG232599      | GPR101  |
| 293 |  |  | EG331480      | GPR12   |
| 294 |  |  | EG574403      | GPR123  |
| 295 |  |  | EIF2C3        | GPR26   |
| 296 |  |  | ELFN2         | GPR4    |
| 297 |  |  | ELOVL1        | GPR6    |
| 298 |  |  | EN2           | GPR83   |
| 299 |  |  | ENDOD1        | GPR88   |

|     |  |  |                    |          |
|-----|--|--|--------------------|----------|
| 300 |  |  | ENPP6              | GPRIN1   |
| 301 |  |  | ENSMUSG00000078431 | GRIN1    |
| 302 |  |  | ENTPD5             | GRIN2B   |
| 303 |  |  | EPB4.1L3           | GRM2     |
| 304 |  |  | EPN2               | HAS3     |
| 305 |  |  | ERMN               | HCN3     |
| 306 |  |  | ERP27              | HCRTR1   |
| 307 |  |  | ETV1               | HECW1    |
| 308 |  |  | FA2H               | HEXIM2   |
| 309 |  |  | FAM115A            | HPCA     |
| 310 |  |  | FAM13C             | HRH3     |
| 311 |  |  | FAM163A            | HRK      |
| 312 |  |  | FAM178B            | HS3ST2   |
| 313 |  |  | FAM19A4            | HTR1A    |
| 314 |  |  | FAM70A             | HTR1D    |
| 315 |  |  | FAM89A             | HTR2C    |
| 316 |  |  | FBXO27             | HTR3A    |
| 317 |  |  | FUT10              | HTR5A    |
| 318 |  |  | GAB3               | HTR7     |
| 319 |  |  | GABRB2             | ICA1L    |
| 320 |  |  | GALNT10            | ICAM5    |
| 321 |  |  | GALNT3             | IGHMBP2  |
| 322 |  |  | GFOD1              | IKZF4    |
| 323 |  |  | GJC2               | IL1RAPL2 |
| 324 |  |  | GJE1               | IL34     |
| 325 |  |  | GM22               | INPP4B   |
| 326 |  |  | GM410              | IQSEC2   |
| 327 |  |  | GNG8               | IRS4     |
| 328 |  |  | GPN1               | ISLR2    |
| 329 |  |  | GPR45              | ITPKA    |
| 330 |  |  | GPR62              | JAG2     |
| 331 |  |  | GPR75              | JAK3     |
| 332 |  |  | GRIK1              | JPH3     |
| 333 |  |  | GRIK2              | JPH4     |
| 334 |  |  | GRIK4              | KALRN    |
| 335 |  |  | GSTO2              | KCNA4    |
| 336 |  |  | GSX1               | KCNAB1   |
| 337 |  |  | HABP4              | KCNF1    |
| 338 |  |  | HAPLN2             | KCNG1    |
| 339 |  |  | HAPLN3             | KCNH1    |
| 340 |  |  | HBP1               | KCNJ9    |
| 341 |  |  | HEBP2              | KCNK12   |
| 342 |  |  | HHIP               | KCNMB2   |



|     |  |  |              |              |
|-----|--|--|--------------|--------------|
| 343 |  |  | HIST1H2BB    | KCNN1        |
| 344 |  |  | HIST1H3B     | KCNQ3        |
| 345 |  |  | HMBX1        | KCNQ5        |
| 346 |  |  | HOXD1        | KCNS2        |
| 347 |  |  | HSD17B7      | KCNT1        |
| 348 |  |  | HSF2         | KCNV1        |
| 349 |  |  | IL12RB1      | KIF17        |
| 350 |  |  | IL1A         | KLHL1        |
| 351 |  |  | IL23A        | KRT73        |
| 352 |  |  | INPP4A       | L1CAM        |
| 353 |  |  | INSC         | LDOC1        |
| 354 |  |  | IPW          | LEFTY2       |
| 355 |  |  | ITGB4        | LEMD1        |
| 356 |  |  | ITPR2        | LHX6         |
| 357 |  |  | JAM2         | LHX8         |
| 358 |  |  | JAM3         | LHX9         |
| 359 |  |  | JMJD2D       | LIN7B        |
| 360 |  |  | JMY          | LOC100036521 |
| 361 |  |  | KCND3        | LOR          |
| 362 |  |  | KCNH5        | LRFN1        |
| 363 |  |  | KCNH8        | LRFN2        |
| 364 |  |  | KCNIP1       | LRFN5        |
| 365 |  |  | KCNK13       | LSM11        |
| 366 |  |  | KCNQ2        | LYSMD4       |
| 367 |  |  | KIF13B       | MACROD2      |
| 368 |  |  | KLHL35       | MAGEL2       |
| 369 |  |  | KLK6         | MAP3K9       |
| 370 |  |  | KRT1         | MAPK11       |
| 371 |  |  | KRTAP10-4    | MAPT         |
| 372 |  |  | LATS2        | MARCH11      |
| 373 |  |  | LDLRAP1      | MARCH4       |
| 374 |  |  | LGI2         | MAS1         |
| 375 |  |  | LHFPL3       | MATK         |
| 376 |  |  | LIMCH1       | MCG_21548    |
| 377 |  |  | LITAF        | MCHR1        |
| 378 |  |  | LNX1         | MED14        |
| 379 |  |  | LOC100047123 | MEG3         |
| 380 |  |  | LOC100049166 | MFSD4        |
| 381 |  |  | LOC552913    | MMP24        |
| 382 |  |  | LOC626082    | MPPED1       |
| 383 |  |  | LOC639063    | MRAP2        |
| 384 |  |  | LPAR1        | MTAP9        |
| 385 |  |  | LPCAT2       | MYG1         |

|     |  |  |         |                    |
|-----|--|--|---------|--------------------|
| 386 |  |  | LRP1B   | MYLC2B             |
| 387 |  |  | LRRTM3  | MYT1L              |
| 388 |  |  | M73818  | N28178             |
| 389 |  |  | MAG     | NCRNA00086         |
| 390 |  |  | MATN1   | NECAB3             |
| 391 |  |  | MATN4   | NEDD4L             |
| 392 |  |  | MBP     | NELL1              |
| 393 |  |  | MED14   | NEUROD2            |
| 394 |  |  | MEGF11  | NEUROD6            |
| 395 |  |  | MEIS3   | NHEDC2             |
| 396 |  |  | MESDC2  | NKD2               |
| 397 |  |  | MOBP    | NMBR               |
| 398 |  |  | MOG     | NODAL              |
| 399 |  |  | MON2    | NOS1AP             |
| 400 |  |  | MTAP1A  | NPAS4              |
| 401 |  |  | MX2     | NPTXR              |
| 402 |  |  | MYG1    | NPY5R              |
| 403 |  |  | MYT1    | NRG3               |
| 404 |  |  | NAV3    | NRGN               |
| 405 |  |  | NCALD   | NRIP3              |
| 406 |  |  | NCAM2   | NRSN2              |
| 407 |  |  | NEUROG2 | NTF3               |
| 408 |  |  | NFASC   | NTS                |
| 409 |  |  | NFATC2  | NTSR1              |
| 410 |  |  | NFE2L3  | NXPH2              |
| 411 |  |  | NINJ2   | NXPH3              |
| 412 |  |  | NKAIN1  | ODZ1               |
| 413 |  |  | NKX2-9  | ODZ2               |
| 414 |  |  | NKX6-2  | OLFM3              |
| 415 |  |  | NMRAL1  | OLFR1344           |
| 416 |  |  | NPB     | OTTMUSG00000000720 |
| 417 |  |  | NTRK3   | OTTMUSG00000006514 |
| 418 |  |  | NUDT17  | OTTMUSG00000011355 |
| 419 |  |  | NXPH1   | OTTMUSG00000015348 |
| 420 |  |  | OPALIN  | OTTMUSG00000015750 |
| 421 |  |  | OPRL1   | PAK6               |
| 422 |  |  | OSM     | PANX2              |
| 423 |  |  | OSTF1   | PAPPA2             |
| 424 |  |  | PACS2   | PCDHA10            |
| 425 |  |  | PAK7    | PCDHA11            |
| 426 |  |  | PCDH15  | PCLO               |
| 427 |  |  | PCDH20  | PCNXL2             |
| 428 |  |  | PCDHB10 | PCSK2              |

|     |  |  |          |          |
|-----|--|--|----------|----------|
| 429 |  |  | PDE4B    | PDE10A   |
| 430 |  |  | PDE7B    | PDZD4    |
| 431 |  |  | PDGFRA   | PFKP     |
| 432 |  |  | PDXK     | PGM2L1   |
| 433 |  |  | PHXR1    | PGR      |
| 434 |  |  | PIGT     | PHYHIP   |
| 435 |  |  | PIGZ     | PIK3R6   |
| 436 |  |  | PKD2L1   | PIP5KL1  |
| 437 |  |  | PLD6     | PLCXD1   |
| 438 |  |  | PLEKHH1  | PLEKHG4  |
| 439 |  |  | PLP1     | PLEKHG5  |
| 440 |  |  | PLXNB3   | PLXNA4   |
| 441 |  |  | PNLIP    | PNMA1    |
| 442 |  |  | POLR3E   | PNMA2    |
| 443 |  |  | POLR3F   | PNMA3    |
| 444 |  |  | PPAPDC1A | PNOC     |
| 445 |  |  | PPFIBP1  | POMC     |
| 446 |  |  | PPNR     | PRKCC    |
| 447 |  |  | PRAMEL3  | PRKCE    |
| 448 |  |  | PRIMA1   | PRND     |
| 449 |  |  | PRKCB    | PROKR2   |
| 450 |  |  | PRTG     | PRPH     |
| 451 |  |  | PTGER1   | PRRT2    |
| 452 |  |  | PTPDC1   | PRRT3    |
| 453 |  |  | PTPN20   | PRSS12   |
| 454 |  |  | PVRL1    | PTCHD1   |
| 455 |  |  | RANBP17  | PTH2R    |
| 456 |  |  | RASSF10  | PTPN2    |
| 457 |  |  | RASSF8   | PTPRD    |
| 458 |  |  | RBPJL    | PTPRK    |
| 459 |  |  | RCBTB1   | PTPRN2   |
| 460 |  |  | RGNEF    | R75193   |
| 461 |  |  | RGS16    | RAC3     |
| 462 |  |  | RGS3     | RAPGEFL1 |
| 463 |  |  | RHPN1    | RASGEF1C |
| 464 |  |  | RNF165   | RASL10A  |
| 465 |  |  | RNF220   | RBM9     |
| 466 |  |  | RNPEPL1  | REM2     |
| 467 |  |  | RPP30    | RHOV     |
| 468 |  |  | RPS6     | RIAN     |
| 469 |  |  | S100A3   | RIMBP2   |
| 470 |  |  | S1PR2    | RIN1     |
| 471 |  |  | S1PR5    | RLBP1L1  |

|     |  |  |            |           |
|-----|--|--|------------|-----------|
| 472 |  |  | SAAL1      | RPH3A     |
| 473 |  |  | SCFD2      | RPRML     |
| 474 |  |  | SCYL2      | RPS20     |
| 475 |  |  | SEC14L5    | RPS6KL1   |
| 476 |  |  | SEMA5A     | RSPO2     |
| 477 |  |  | SENP8      | RTN4R     |
| 478 |  |  | SEPT7      | RTN4RL2   |
| 479 |  |  | SEZ6L      | RUNDC3A   |
| 480 |  |  | SFRS14     | RUNX1T1   |
| 481 |  |  | SH3RF1     | RUSC1     |
| 482 |  |  | SLAIN1     | RXFP1     |
| 483 |  |  | SLC16A1    | SAMD5     |
| 484 |  |  | SLC1A6     | SATB2     |
| 485 |  |  | SLC22A21   | SCAND3    |
| 486 |  |  | SLC24A2    | SCN8A     |
| 487 |  |  | SLC25A27   | SCN9A     |
| 488 |  |  | SLC35F1    | SERPINB1B |
| 489 |  |  | SLC38A9    | SH2D5     |
| 490 |  |  | SLITRK3    | SH3RF3    |
| 491 |  |  | SNTG1      | SHANK2    |
| 492 |  |  | SNX22      | SLAIN2    |
| 493 |  |  | SNX30      | SLC22A8   |
| 494 |  |  | SORCS3     | SLC29A4   |
| 495 |  |  | SOX10      | SLC30A3   |
| 496 |  |  | SP7        | SLC32A1   |
| 497 |  |  | SPEER4B    | SLC35F4   |
| 498 |  |  | SPRED3     | SLC5A5    |
| 499 |  |  | SPRY4      | SLC6A17   |
| 500 |  |  | SPSB1      | SLC6A7    |
| 501 |  |  | SRPK3      | SLCO1A4   |
| 502 |  |  | SSTR1      | SLIT1     |
| 503 |  |  | SSXB1      | SMPD3     |
| 504 |  |  | ST18       | SNCB      |
| 505 |  |  | ST6GALNAC3 | SNRPN     |
| 506 |  |  | STK32A     | SOBP      |
| 507 |  |  | STRN       | SOX7      |
| 508 |  |  | SUSD5      | SP8       |
| 509 |  |  | SYN2       | SPHKAP    |
| 510 |  |  | SYNJ2      | SPRN      |
| 511 |  |  | SYS1       | SSTR2     |
| 512 |  |  | TDRD7      | SSTR3     |
| 513 |  |  | THSD4      | SSTR4     |
| 514 |  |  | TMCO3      | ST3GAL6   |

|     |  |  |            |         |
|-----|--|--|------------|---------|
| 515 |  |  | TMEM108    | ST8SIA2 |
| 516 |  |  | TMEM110    | STAM    |
| 517 |  |  | TMEM121    | STK32B  |
| 518 |  |  | TMEM125    | STK32C  |
| 519 |  |  | TMEM132D   | STX1A   |
| 520 |  |  | TMEM141    | STXBP5L |
| 521 |  |  | TMEM63A    | SYNE1   |
| 522 |  |  | TMOD2      | SYT13   |
| 523 |  |  | TMPRSS5    | SYT5    |
| 524 |  |  | TNS3       | TAC2    |
| 525 |  |  | TRAF4      | TBC1D30 |
| 526 |  |  | TRIM36     | TBR1    |
| 527 |  |  | TRPC2      | THSD1   |
| 528 |  |  | TSPAN2     | TIAM2   |
| 529 |  |  | TTL5       | TMEM29  |
| 530 |  |  | TUBA1A     | TMEM44  |
| 531 |  |  | TXNDC17    | TMEM63C |
| 532 |  |  | UNC5B      | TMEM90A |
| 533 |  |  | USP16      | TRH     |
| 534 |  |  | UST        | TRHDE   |
| 535 |  |  | VCAN       | TRHR    |
| 536 |  |  | WDR79      | TRIM46  |
| 537 |  |  | WNT3       | TRIM66  |
| 538 |  |  | XRCC3      | TRIM67  |
| 539 |  |  | YPEL2      | TRP73   |
| 540 |  |  | ZCCHC11    | TRPA1   |
| 541 |  |  | ZDHHC9     | TRPC4   |
| 542 |  |  | ZER1       | TRPC5   |
| 543 |  |  | ZFHX2AS    | TTL     |
| 544 |  |  | ZFP101     | TUBG2   |
| 545 |  |  | ZFP14      | UNC13A  |
| 546 |  |  | ZFP235     | UNC5D   |
| 547 |  |  | ZFP276     | USP29   |
| 548 |  |  | ZFP287     | VASH2   |
| 549 |  |  | ZFP422-RS1 | VGf     |
| 550 |  |  | ZFP462     | VIP     |
| 551 |  |  | ZFP617     | VSTM2L  |
| 552 |  |  |            | VWA5B2  |
| 553 |  |  |            | WSCD2   |
| 554 |  |  |            | YDJC    |
| 555 |  |  |            | ZBTB8B  |
| 556 |  |  |            | ZFP184  |
| 557 |  |  |            | ZFP341  |

|     |  |  |  |         |
|-----|--|--|--|---------|
| 558 |  |  |  | ZFP575  |
| 559 |  |  |  | ZFP804A |
| 560 |  |  |  | ZIC3    |
| 561 |  |  |  | ZIC4    |
| 562 |  |  |  | ZMAT4   |
| 563 |  |  |  | ZMYM3   |
