# Supplementary material
Source: PubMed Central journal article supplement (PMC4875420)
Supplement: 13238_2012_14_MOESM4_ESM.pdf [file 13238_2012_14_MOESM4_ESM.pdf]

**Table S3** Functional clustering of NSCs, astrocytes, OLs and neurons specifically expressed genes ( $p \leq 0.01$ ).

| <b>NSC enriched functions</b>       |          |                                                        |          |
|-------------------------------------|----------|--------------------------------------------------------|----------|
| Index                               | p-value  | GO terms                                               | FDR (%)  |
| 1                                   | 4.94E-12 | GO:0022402~cell cycle process                          | 7.77E-09 |
| 2                                   | 6.65E-12 | GO:0007049~cell cycle                                  | 1.05E-08 |
| 3                                   | 8.50E-12 | GO:0022403~cell cycle phase                            | 1.34E-08 |
| 4                                   | 4.04E-11 | GO:0000279~M phase                                     | 6.35E-08 |
| 5                                   | 2.21E-09 | GO:0000278~mitotic cell cycle                          | 3.47E-06 |
| 6                                   | 6.98E-09 | GO:0000087~M phase of mitotic cell cycle               | 1.10E-05 |
| 7                                   | 4.68E-08 | GO:0000280~nuclear division                            | 7.35E-05 |
| 8                                   | 4.68E-08 | GO:0007067~mitosis                                     | 7.35E-05 |
| 9                                   | 7.17E-08 | GO:0048285~organelle fission                           | 1.13E-04 |
| 10                                  | 7.03E-07 | GO:0051301~cell division                               | 1.11E-03 |
| 11                                  | 1.43E-09 | GO:0003677~DNA binding                                 | 1.84E-06 |
| 12                                  | 2.34E-09 | GO:0006350~transcription                               | 3.67E-06 |
| 13                                  | 3.43E-08 | GO:0045449~regulation of transcription                 | 5.39E-05 |
| 14                                  | 4.34E-03 | GO:0006355~regulation of transcription, DNA-dependent  | 6.61E+00 |
| 15                                  | 5.30E-03 | GO:0051252~regulation of RNA metabolic process         | 8.02E+00 |
| 16                                  | 6.00E-03 | GO:0030528~transcription regulator activity            | 7.44E+00 |
| 17                                  | 1.71E-05 | GO:0006259~DNA metabolic process                       | 2.69E-02 |
| 18                                  | 2.66E-05 | GO:0006974~response to DNA damage stimulus             | 4.19E-02 |
| 19                                  | 1.78E-04 | GO:0033554~cellular response to stress                 | 2.79E-01 |
| 20                                  | 3.52E-04 | GO:0006281~DNA repair                                  | 5.52E-01 |
| 21                                  | 7.82E-04 | GO:0003682~chromatin binding                           | 9.99E-01 |
| 22                                  | 1.60E-03 | GO:0004386~helicase activity                           | 2.04E+00 |
| 23                                  | 6.06E-03 | GO:0042623~ATPase activity, coupled                    | 7.51E+00 |
| 24                                  | 6.09E-03 | GO:0016887~ATPase activity                             | 7.55E+00 |
| 25                                  | 4.34E-03 | GO:0006355~regulation of transcription, DNA-dependent  | 6.61E+00 |
| 26                                  | 5.30E-03 | GO:0051252~regulation of RNA metabolic process         | 8.02E+00 |
| 27                                  | 6.00E-03 | GO:0030528~transcription regulator activity            | 7.44E+00 |
| 28                                  | 9.84E-03 | GO:0032886~regulation of microtubule-based process     | 1.44E+01 |
| 29                                  | 9.28E-03 | GO:0016055~Wnt receptor signaling pathway              | 1.36E+01 |
| 30                                  | 3.98E-03 | GO:0006396~RNA processing                              | 6.07E+00 |
| <b>Astrocyte enriched functions</b> |          |                                                        |          |
| Index                               | p-value  | GO terms                                               | FDR (%)  |
| 1                                   | 1.27E-04 | GO:0030900~forebrain development                       | 1.99E-01 |
| 2                                   | 4.70E-04 | GO:0051960~regulation of nervous system development    | 7.34E-01 |
| 3                                   | 1.38E-03 | GO:0045596~negative regulation of cell differentiation | 2.14E+00 |
| 4                                   | 1.91E-03 | GO:0050767~regulation of neurogenesis                  | 2.96E+00 |
| 5                                   | 3.05E-03 | GO:0045165~cell fate commitment                        | 4.68E+00 |
| 6                                   | 4.27E-03 | GO:0060284~regulation of cell development              | 6.49E+00 |
| 7                                   | 4.85E-03 | GO:0045664~regulation of neuron differentiation        | 7.34E+00 |
| 8                                   | 5.24E-03 | GO:0030182~neuron differentiation                      | 7.91E+00 |

|                                           |          |                                                             |          |
|-------------------------------------------|----------|-------------------------------------------------------------|----------|
| 9                                         | 9.84E-03 | GO:0042127~regulation of cell proliferation                 | 1.44E+01 |
| 10                                        | 2.35E-03 | GO:0007167~enzyme linked receptor protein signaling pathway | 3.63E+00 |
| 11                                        | 1.27E-04 | GO:0030900~forebrain development                            | 1.99E-01 |
| 12                                        | 6.61E-04 | GO:0048598~embryonic morphogenesis                          | 1.03E+00 |
| 13                                        | 7.33E-04 | GO:0048562~embryonic organ morphogenesis                    | 1.14E+00 |
| 14                                        | 1.38E-03 | GO:0045596~negative regulation of cell differentiation      | 2.14E+00 |
| 15                                        | 1.84E-03 | GO:0051216~cartilage development                            | 2.85E+00 |
| 16                                        | 2.99E-03 | GO:0001501~skeletal system development                      | 4.59E+00 |
| 17                                        | 3.05E-03 | GO:0045165~cell fate commitment                             | 4.68E+00 |
| 18                                        | 3.29E-03 | GO:0007267~cell-cell signaling                              | 5.04E+00 |
| 19                                        | 4.06E-03 | GO:0030326~embryonic limb morphogenesis                     | 6.18E+00 |
| 20                                        | 4.06E-03 | GO:0035113~embryonic appendage morphogenesis                | 6.18E+00 |
| 21                                        | 5.24E-03 | GO:0030182~neuron differentiation                           | 7.91E+00 |
| 22                                        | 5.56E-03 | GO:0048568~embryonic organ development                      | 8.37E+00 |
| 23                                        | 7.40E-03 | GO:0035108~limb morphogenesis                               | 1.10E+01 |
| 24                                        | 7.40E-03 | GO:0035107~appendage morphogenesis                          | 1.10E+01 |
| 25                                        | 7.54E-03 | GO:0007423~sensory organ development                        | 1.12E+01 |
| 26                                        | 8.33E-03 | GO:0048736~appendage development                            | 1.23E+01 |
| 27                                        | 8.33E-03 | GO:0060173~limb development                                 | 1.23E+01 |
| 28                                        | 9.02E-03 | GO:0009953~dorsal/ventral pattern formation                 | 1.32E+01 |
| 29                                        | 9.54E-03 | GO:0040007~growth                                           | 1.39E+01 |
| 30                                        | 9.84E-03 | GO:0042127~regulation of cell proliferation                 | 1.44E+01 |
| 31                                        | 4.38E-04 | GO:0008635~activation of caspase activity by cytochrome c   | 6.84E-01 |
| 32                                        | 7.54E-03 | GO:0007423~sensory organ development                        | 1.12E+01 |
| 33                                        | 2.35E-03 | GO:0007167~enzyme linked receptor protein signaling pathway | 3.63E+00 |
| <b>Oligodendrocyte enriched functions</b> |          |                                                             |          |
| Index                                     | p-value  | GO terms                                                    | FDR (%)  |
| 1                                         | 9.75E-06 | GO:0007155~cell adhesion                                    | 1.56E-02 |
| 2                                         | 1.01E-05 | GO:0022610~biological adhesion                              | 1.61E-02 |
| 3                                         | 9.36E-04 | GO:0019228~regulation of action potential in neuron         | 1.49E+00 |
| 4                                         | 1.64E-03 | GO:0019226~transmission of nerve impulse                    | 2.60E+00 |
| 5                                         | 2.14E-03 | GO:0001508~regulation of action potential                   | 3.38E+00 |
| 6                                         | 4.10E-03 | GO:0042391~regulation of membrane potential                 | 6.38E+00 |
| 7                                         | 4.13E-03 | GO:0007272~ensheathment of neurons                          | 6.43E+00 |
| 8                                         | 4.13E-03 | GO:0008366~axon ensheathment                                | 6.43E+00 |
| 9                                         | 4.95E-03 | GO:0006873~cellular ion homeostasis                         | 7.66E+00 |
| 10                                        | 6.04E-03 | GO:0055082~cellular chemical homeostasis                    | 9.26E+00 |
| 11                                        | 9.38E-03 | GO:0048878~chemical homeostasis                             | 1.40E+01 |
| 12                                        | 2.88E-04 | GO:0005540~hyaluronic acid binding                          | 3.88E-01 |
| 13                                        | 1.22E-04 | GO:0022803~passive transmembrane transporter activity       | 1.64E-01 |
| 14                                        | 1.22E-04 | GO:0015267~channel activity                                 | 1.64E-01 |
| 15                                        | 7.18E-04 | GO:0005216~ion channel activity                             | 9.67E-01 |
| 16                                        | 9.91E-04 | GO:0022838~substrate specific channel activity              | 1.33E+00 |

| 17                               | 2.54E-03 | GO:0022836~gated channel activity                                | 3.38E+00 |
|----------------------------------|----------|------------------------------------------------------------------|----------|
| 18                               | 2.84E-03 | GO:0005261~cation channel activity                               | 3.78E+00 |
| 19                               | 4.71E-03 | GO:0006811~ion transport                                         | 7.30E+00 |
| 20                               | 9.05E-03 | GO:0046873~metal ion transmembrane transporter activity          | 1.16E+01 |
| 21                               | 3.31E-03 | GO:0030182~neuron differentiation                                | 5.18E+00 |
| 22                               | 4.95E-03 | GO:0006873~cellular ion homeostasis                              | 7.66E+00 |
| 23                               | 6.04E-03 | GO:0055082~cellular chemical homeostasis                         | 9.26E+00 |
| 24                               | 9.38E-03 | GO:0048878~chemical homeostasis                                  | 1.40E+01 |
| 25                               | 7.18E-03 | GO:0044092~negative regulation of molecular function             | 1.09E+01 |
| <b>Neuron enriched functions</b> |          |                                                                  |          |
| Index                            | p-value  | GO terms                                                         | FDR (%)  |
| 1                                | 7.58E-13 | GO:0005261~cation channel activity                               | 1.06E-09 |
| 2                                | 3.29E-12 | GO:0005216~ion channel activity                                  | 4.59E-09 |
| 3                                | 5.36E-12 | GO:0046873~metal ion transmembrane transporter activity          | 7.49E-09 |
| 4                                | 7.44E-12 | GO:0022838~substrate specific channel activity                   | 1.04E-08 |
| 5                                | 1.06E-11 | GO:0022803~passive transmembrane transporter activity            | 1.48E-08 |
| 6                                | 1.06E-11 | GO:0015267~channel activity                                      | 1.48E-08 |
| 7                                | 1.47E-11 | GO:0022836~gated channel activity                                | 2.05E-08 |
| 8                                | 1.73E-08 | GO:0006811~ion transport                                         | 2.78E-05 |
| 9                                | 3.09E-08 | GO:0030001~metal ion transport                                   | 4.97E-05 |
| 10                               | 2.43E-07 | GO:0006812~cation transport                                      | 3.91E-04 |
| 11                               | 2.80E-07 | GO:0022843~voltage-gated cation channel activity                 | 3.91E-04 |
| 12                               | 3.09E-07 | GO:0005267~potassium channel activity                            | 4.31E-04 |
| 13                               | 3.26E-06 | GO:0022832~voltage-gated channel activity                        | 4.56E-03 |
| 14                               | 3.26E-06 | GO:0005244~voltage-gated ion channel activity                    | 4.56E-03 |
| 15                               | 4.11E-06 | GO:0031420~alkali metal ion binding                              | 5.73E-03 |
| 16                               | 4.36E-06 | GO:0030955~potassium ion binding                                 | 6.09E-03 |
| 17                               | 5.18E-06 | GO:0006813~potassium ion transport                               | 8.34E-03 |
| 18                               | 2.93E-05 | GO:0005249~voltage-gated potassium channel activity              | 4.09E-02 |
| 19                               | 5.28E-05 | GO:0015672~monovalent inorganic cation transport                 | 8.50E-02 |
| 20                               | 2.97E-03 | GO:0055085~transmembrane transport                               | 4.68E+00 |
| 21                               | 5.06E-08 | GO:0030182~neuron differentiation                                | 8.14E-05 |
| 22                               | 1.47E-07 | GO:0048666~neuron development                                    | 2.36E-04 |
| 23                               | 5.44E-07 | GO:0031175~neuron projection development                         | 8.76E-04 |
| 24                               | 1.26E-06 | GO:0007409~axonogenesis                                          | 2.03E-03 |
| 25                               | 3.30E-06 | GO:0048812~neuron projection morphogenesis                       | 5.31E-03 |
| 26                               | 4.98E-06 | GO:0048667~cell morphogenesis involved in neuron differentiation | 8.03E-03 |
| 27                               | 7.49E-06 | GO:0000904~cell morphogenesis involved in differentiation        | 1.21E-02 |
| 28                               | 1.76E-05 | GO:0048858~cell projection morphogenesis                         | 2.83E-02 |
| 29                               | 3.10E-05 | GO:0032990~cell part morphogenesis                               | 4.99E-02 |
| 30                               | 3.14E-05 | GO:0007411~axon guidance                                         | 5.05E-02 |
| 31                               | 3.16E-05 | GO:0030030~cell projection organization                          | 5.08E-02 |
| 32                               | 6.30E-04 | GO:0000902~cell morphogenesis                                    | 1.01E+00 |

|    |          |                                                                   |          |
|----|----------|-------------------------------------------------------------------|----------|
| 33 | 2.40E-03 | GO:0032989~cellular component morphogenesis                       | 3.79E+00 |
| 34 | 3.72E-03 | GO:0006928~cell motion                                            | 5.83E+00 |
| 35 | 6.94E-07 | GO:0042923~neuropeptide binding                                   | 9.69E-04 |
| 36 | 6.94E-07 | GO:0008188~neuropeptide receptor activity                         | 9.69E-04 |
| 37 | 5.45E-06 | GO:0004993~serotonin receptor activity                            | 7.60E-03 |
| 38 | 8.55E-05 | GO:0008227~amine receptor activity                                | 1.19E-01 |
| 39 | 7.90E-03 | GO:0051378~serotonin binding                                      | 1.05E+01 |
| 40 | 1.49E-11 | GO:0030594~neurotransmitter receptor activity                     | 2.08E-08 |
| 41 | 1.49E-11 | GO:0042165~neurotransmitter binding                               | 2.08E-08 |
| 42 | 6.94E-07 | GO:0042923~neuropeptide binding                                   | 9.69E-04 |
| 43 | 6.94E-07 | GO:0008188~neuropeptide receptor activity                         | 9.69E-04 |
| 44 | 7.27E-05 | GO:0001653~peptide receptor activity                              | 1.02E-01 |
| 45 | 7.27E-05 | GO:0008528~peptide receptor activity, G-protein coupled           | 1.02E-01 |
| 46 | 1.47E-03 | GO:0042277~peptide binding                                        | 2.03E+00 |
| 47 | 3.79E-06 | GO:0007268~synaptic transmission                                  | 6.11E-03 |
| 48 | 4.06E-06 | GO:0019226~transmission of nerve impulse                          | 6.53E-03 |
| 49 | 8.31E-06 | GO:0007267~cell-cell signaling                                    | 1.34E-02 |
| 50 | 3.59E-05 | GO:0006836~neurotransmitter transport                             | 5.78E-02 |
| 51 | 5.01E-05 | GO:0046903~secretion                                              | 8.06E-02 |
| 52 | 5.31E-05 | GO:0003001~generation of a signal involved in cell-cell signaling | 8.55E-02 |
| 53 | 8.08E-05 | GO:0007269~neurotransmitter secretion                             | 1.30E-01 |
| 54 | 2.62E-04 | GO:0001505~regulation of neurotransmitter levels                  | 4.20E-01 |
| 55 | 4.48E-04 | GO:0032940~secretion by cell                                      | 7.19E-01 |
| 56 | 1.88E-03 | GO:0006887~exocytosis                                             | 2.98E+00 |
| 57 | 2.72E-03 | GO:0048489~synaptic vesicle transport                             | 4.29E+00 |
| 58 | 4.66E-03 | GO:0016079~synaptic vesicle exocytosis                            | 7.24E+00 |
| 59 | 9.58E-03 | GO:0046879~hormone secretion                                      | 1.44E+01 |
| 60 | 6.94E-07 | GO:0042923~neuropeptide binding                                   | 9.69E-04 |
| 61 | 6.94E-07 | GO:0008188~neuropeptide receptor activity                         | 9.69E-04 |
| 62 | 3.86E-03 | GO:0004994~somatostatin receptor activity                         | 5.26E+00 |
| 63 | 7.75E-03 | GO:0005179~hormone activity                                       | 1.03E+01 |
| 64 | 4.16E-04 | GO:0005262~calcium channel activity                               | 5.80E-01 |
| 65 | 8.45E-04 | GO:0006816~calcium ion transport                                  | 1.35E+00 |
| 66 | 5.90E-03 | GO:0015674~di-, tri-valent inorganic cation transport             | 9.09E+00 |
| 67 | 6.29E-04 | GO:0030534~adult behavior                                         | 1.01E+00 |
| 68 | 1.64E-03 | GO:0008344~adult locomotory behavior                              | 2.60E+00 |
| 69 | 1.36E-04 | GO:0005003~ephrin receptor activity                               | 1.90E-01 |
| 70 | 9.48E-05 | GO:0033555~multicellular organismal response to stress            | 1.52E-01 |
| 71 | 2.61E-03 | GO:0001662~behavioral fear response                               | 4.12E+00 |
| 72 | 2.61E-03 | GO:0002209~behavioral defense response                            | 4.12E+00 |
| 73 | 6.08E-03 | GO:0007612~learning                                               | 9.35E+00 |
| 74 | 6.44E-03 | GO:0042596~fear response                                          | 9.88E+00 |
| 75 | 2.80E-04 | GO:0022834~ligand-gated channel activity                          | 3.90E-01 |

|     |          |                                                                   |          |
|-----|----------|-------------------------------------------------------------------|----------|
| 76  | 2.80E-04 | GO:0015276~ligand-gated ion channel activity                      | 3.90E-01 |
| 77  | 3.46E-04 | GO:0005230~extracellular ligand-gated ion channel activity        | 4.82E-01 |
| 78  | 4.68E-04 | GO:0007611~learning or memory                                     | 7.51E-01 |
| 79  | 5.51E-03 | GO:0008306~associative learning                                   | 8.51E+00 |
| 80  | 6.08E-03 | GO:0007612~learning                                               | 9.35E+00 |
| 81  | 1.63E-03 | GO:0008038~neuron recognition                                     | 2.59E+00 |
| 82  | 8.18E-03 | GO:0007413~axonal fasciculation                                   | 1.24E+01 |
| 83  | 1.38E-03 | GO:0045761~regulation of adenylate cyclase activity               | 2.20E+00 |
| 84  | 1.50E-03 | GO:0019933~cAMP-mediated signaling                                | 2.39E+00 |
| 85  | 1.64E-03 | GO:0051339~regulation of lyase activity                           | 2.60E+00 |
| 86  | 1.64E-03 | GO:0031279~regulation of cyclase activity                         | 2.60E+00 |
| 87  | 2.09E-03 | GO:0030817~regulation of cAMP biosynthetic process                | 3.31E+00 |
| 88  | 2.26E-03 | GO:0019935~cyclic-nucleotide-mediated signaling                   | 3.57E+00 |
| 89  | 2.44E-03 | GO:0030814~regulation of cAMP metabolic process                   | 3.86E+00 |
| 90  | 2.92E-03 | GO:0019932~second-messenger-mediated signaling                    | 4.60E+00 |
| 91  | 3.05E-03 | GO:0030808~regulation of nucleotide biosynthetic process          | 4.79E+00 |
| 92  | 3.05E-03 | GO:0030802~regulation of cyclic nucleotide biosynthetic process   | 4.79E+00 |
| 93  | 3.76E-03 | GO:0030799~regulation of cyclic nucleotide metabolic process      | 5.88E+00 |
| 94  | 4.30E-03 | GO:0006140~regulation of nucleotide metabolic process             | 6.70E+00 |
| 95  | 9.58E-03 | GO:0007190~activation of adenylate cyclase activity               | 1.44E+01 |
| 96  | 8.70E-05 | GO:0043167~ion binding                                            | 1.21E-01 |
| 97  | 1.57E-04 | GO:0046872~metal ion binding                                      | 2.19E-01 |
| 98  | 2.28E-04 | GO:0043169~cation binding                                         | 3.18E-01 |
| 99  | 5.31E-05 | GO:0003001~generation of a signal involved in cell-cell signaling | 8.55E-02 |
| 100 | 9.58E-03 | GO:0046879~hormone secretion                                      | 1.44E+01 |
| 101 | 2.31E-03 | GO:0030900~forebrain development                                  | 3.65E+00 |
| 102 | 2.77E-03 | GO:0007156~homophilic cell adhesion                               | 4.36E+00 |
| 103 | 9.37E-03 | GO:0016337~cell-cell adhesion                                     | 1.41E+01 |
| 104 | 1.96E-04 | GO:0014070~response to organic cyclic substance                   | 3.16E-01 |
| 105 | 3.24E-04 | GO:0043279~response to alkaloid                                   | 5.20E-01 |
| 106 | 4.40E-03 | GO:0019233~sensory perception of pain                             | 6.85E+00 |
| 107 | 6.08E-03 | GO:0007612~learning                                               | 9.35E+00 |
| 108 | 8.52E-03 | GO:0031644~regulation of neurological system process              | 1.29E+01 |
| 109 | 5.76E-03 | GO:0050767~regulation of neurogenesis                             | 8.88E+00 |
| 110 | 9.48E-05 | GO:0033555~multicellular organismal response to stress            | 1.52E-01 |
| 111 | 4.40E-03 | GO:0019233~sensory perception of pain                             | 6.85E+00 |
| 112 | 6.44E-03 | GO:0048265~response to pain                                       | 9.88E+00 |
| 113 | 2.31E-03 | GO:0030900~forebrain development                                  | 3.65E+00 |
| 114 | 2.61E-03 | GO:0021879~forebrain neuron differentiation                       | 4.12E+00 |
| 115 | 3.51E-03 | GO:0021537~telencephalon development                              | 5.50E+00 |
| 116 | 3.89E-03 | GO:0021872~generation of neurons in the forebrain                 | 6.09E+00 |
| 117 | 4.00E-03 | GO:0021877~forebrain neuron fate commitment                       | 6.26E+00 |
| 118 | 4.45E-03 | GO:0021543~pallium development                                    | 6.93E+00 |

|     |          |                                                                  |          |
|-----|----------|------------------------------------------------------------------|----------|
| 119 | 8.18E-03 | GO:0021892~cerebral cortex GABAergic interneuron differentiation | 1.24E+01 |
| 120 | 3.72E-03 | GO:0006928~cell motion                                           | 5.83E+00 |
| 121 | 1.24E-03 | GO:0043523~regulation of neuron apoptosis                        | 1.97E+00 |

Different clusters were separated by different colors.
