# Supplementary material
Source: PubMed Central journal article supplement (PMC4875420)
Supplement: 13238_2012_14_MOESM5_ESM.pdf [file 13238_2012_14_MOESM5_ESM.pdf]

**Table S4** Gene co-expression data between the 57 transcription regulators and other neural cell specifically expressed genes.

| Regulator | Targets | Regulator probe | Target probe | PCC    |
|-----------|---------|-----------------|--------------|--------|
| HOXA1     | CCT4    | 1420565_at      | 1415868_at   | 0.8373 |
| ZIK1      | CCT4    | 1421395_at      | 1415868_at   | 0.8122 |
| HMGA2     | CCT4    | 1422851_at      | 1415868_at   | 0.8408 |
| SUV39H2   | CCT4    | 1422979_at      | 1415868_at   | 0.8280 |
| RAD18     | CCT4    | 1423318_at      | 1415868_at   | 0.8466 |
| SMARCC1   | CCT4    | 1423417_at      | 1415868_at   | 0.8122 |
| CAND1     | CCT4    | 1428649_at      | 1415868_at   | 0.8024 |
| MCM8      | CCT4    | 1429557_at      | 1415868_at   | 0.8229 |
| HELLS     | CCT4    | 1430139_at      | 1415868_at   | 0.8170 |
| SUV39H2   | CCT4    | 1433996_at      | 1415868_at   | 0.8370 |
| PIF1      | CCT4    | 1436738_at      | 1415868_at   | 0.8509 |
| RAD51C    | CCT4    | 1438453_at      | 1415868_at   | 0.8398 |
| TAF1D     | CCT4    | 1442289_at      | 1415868_at   | 0.8850 |
| SUPT16H   | CCT4    | 1449578_at      | 1415868_at   | 0.8464 |
| TCERG1    | CCT4    | 1450100_a_at    | 1415868_at   | 0.8065 |
| MYBL1     | CCT4    | 1450481_at      | 1415868_at   | 0.8613 |
| HMGA2     | CCT4    | 1450780_s_at    | 1415868_at   | 0.8410 |
| HMGA2     | CCT4    | 1450781_at      | 1415868_at   | 0.8230 |
| ZNF451    | CCT4    | 1451816_at      | 1415868_at   | 0.8642 |
| ZBED3     | CCT4    | 1452088_at      | 1415868_at   | 0.8317 |
| MLF1IP    | CCT4    | 1452816_at      | 1415868_at   | 0.8264 |
| PHF6      | CCT4    | 1453761_at      | 1415868_at   | 0.8183 |
| NUSAP1    | NASP    | 1416310_at      | 1416043_at   | 0.9911 |
| SETDB1    | NASP    | 1416670_at      | 1416043_at   | 0.9738 |
| RCOR2     | NASP    | 1417302_at      | 1416043_at   | 0.8940 |
| PSRC1     | NASP    | 1417323_at      | 1416043_at   | 0.9508 |
| ETV5      | NASP    | 1420998_at      | 1416043_at   | 0.9676 |
| ATN1      | NASP    | 1421149_a_at    | 1416043_at   | 0.8264 |
| ZIK1      | NASP    | 1421395_at      | 1416043_at   | 0.9776 |
| NPAS3     | NASP    | 1421567_at      | 1416043_at   | 0.9450 |
| SF1       | NASP    | 1422321_a_at    | 1416043_at   | 0.9396 |
| ILF3      | NASP    | 1422546_at      | 1416043_at   | 0.8479 |
| HMGA2     | NASP    | 1422851_at      | 1416043_at   | 0.8975 |
| SUV39H2   | NASP    | 1422979_at      | 1416043_at   | 0.9574 |
| RAD51C    | NASP    | 1423026_at      | 1416043_at   | 0.9882 |
| RAD18     | NASP    | 1423318_at      | 1416043_at   | 0.8545 |
| SMARCC1   | NASP    | 1423417_at      | 1416043_at   | 0.9179 |
| HIP1      | NASP    | 1424756_at      | 1416043_at   | 0.9777 |
| PSRC1     | NASP    | 1425416_s_at    | 1416043_at   | 0.9838 |
| CAND1     | NASP    | 1428649_at      | 1416043_at   | 0.9539 |
| ZNF157    | NASP    | 1428887_at      | 1416043_at   | 0.9373 |
| MCM8      | NASP    | 1429557_at      | 1416043_at   | 0.8848 |
| HELLS     | NASP    | 1430139_at      | 1416043_at   | 0.9145 |
| TLE4      | NASP    | 1430384_at      | 1416043_at   | 0.8356 |
| TGIF2     | NASP    | 1431115_at      | 1416043_at   | 0.9246 |
| ERCC4     | NASP    | 1432272_a_at    | 1416043_at   | 0.9764 |
| SUV39H2   | NASP    | 1433996_at      | 1416043_at   | 0.9081 |
| SOX3      | NASP    | 1435192_at      | 1416043_at   | 0.8324 |

|         |        |              |              |        |
|---------|--------|--------------|--------------|--------|
| PIF1    | NASP   | 1436738_at   | 1416043_at   | 0.8835 |
| SOX11   | NASP   | 1436790_a_at | 1416043_at   | 0.9033 |
| ASCL1   | NASP   | 1437086_at   | 1416043_at   | 0.8965 |
| RAD51C  | NASP   | 1438453_at   | 1416043_at   | 0.9073 |
| NKRF    | NASP   | 1441325_at   | 1416043_at   | 0.9670 |
| TAF1D   | NASP   | 1442289_at   | 1416043_at   | 0.8405 |
| FOXM1   | NASP   | 1448834_at   | 1416043_at   | 0.9648 |
| SOX4    | NASP   | 1449370_at   | 1416043_at   | 0.8625 |
| SUPT16H | NASP   | 1449578_at   | 1416043_at   | 0.9287 |
| TCERG1  | NASP   | 1450100_a_at | 1416043_at   | 0.9658 |
| ASCL1   | NASP   | 1450164_at   | 1416043_at   | 0.9685 |
| NPAS3   | NASP   | 1450287_at   | 1416043_at   | 0.8270 |
| ZFP354C | NASP   | 1450321_at   | 1416043_at   | 0.9209 |
| MYBL1   | NASP   | 1450481_at   | 1416043_at   | 0.9103 |
| SOX3    | NASP   | 1450485_at   | 1416043_at   | 0.9471 |
| SALL1   | NASP   | 1450489_at   | 1416043_at   | 0.8116 |
| HMGA2   | NASP   | 1450780_s_at | 1416043_at   | 0.8924 |
| ZNF451  | NASP   | 1451816_at   | 1416043_at   | 0.8809 |
| NCOR2   | NASP   | 1451841_a_at | 1416043_at   | 0.9584 |
| ZFP2    | NASP   | 1452025_a_at | 1416043_at   | 0.9349 |
| ZBED3   | NASP   | 1452088_at   | 1416043_at   | 0.8347 |
| CENPF   | NASP   | 1452334_at   | 1416043_at   | 0.9374 |
| MLF1IP  | NASP   | 1452816_at   | 1416043_at   | 0.8712 |
| TTF2    | NASP   | 1452818_at   | 1416043_at   | 0.9424 |
| PHF6    | NASP   | 1453761_at   | 1416043_at   | 0.9752 |
| TAF2    | NASP   | 1457351_at   | 1416043_at   | 0.9691 |
| ZNF69   | NASP   | 1458274_at   | 1416043_at   | 0.8696 |
| NUSAP1  | FSCN1  | 1416310_at   | 1416515_at   | 0.9070 |
| NUSAP1  | SETDB1 | 1416310_at   | 1416670_at   | 0.9811 |
| NUSAP1  | GTSE1  | 1416310_at   | 1416969_at   | 0.9581 |
| NUSAP1  | CSTF1  | 1416310_at   | 1417117_at   | 0.8474 |
| NUSAP1  | VAV3   | 1416310_at   | 1417123_at   | 0.9861 |
| NUSAP1  | RCOR2  | 1416310_at   | 1417302_at   | 0.9015 |
| NUSAP1  | PSRC1  | 1416310_at   | 1417323_at   | 0.9349 |
| NUSAP1  | SART3  | 1416310_at   | 1417548_at   | 0.9144 |
| NUSAP1  | INTS5  | 1416310_at   | 1417887_at   | 0.8961 |
| NUSAP1  | EXO1   | 1416310_at   | 1418027_at   | 0.9838 |
| NUSAP1  | CENPM  | 1416310_at   | 1418184_at   | 0.9650 |
| NUSAP1  | TSGA14 | 1416310_at   | 1419686_at   | 0.9382 |
| NUSAP1  | PEG12  | 1416310_at   | 1420406_at   | 0.9044 |
| NUSAP1  | EIF2S1 | 1416310_at   | 1420491_at   | 0.8090 |
| NUSAP1  | GALC   | 1416310_at   | 1420547_at   | 0.9813 |
| NUSAP1  | WNT7B  | 1416310_at   | 1420891_at   | 0.8663 |
| NUSAP1  | ETV5   | 1416310_at   | 1420998_at   | 0.9639 |
| NUSAP1  | ATN1   | 1416310_at   | 1421149_a_at | 0.8160 |
| NUSAP1  | ADAM12 | 1416310_at   | 1421171_at   | 0.9598 |
| NUSAP1  | ADAM12 | 1416310_at   | 1421172_at   | 0.8175 |
| NUSAP1  | MTAP2  | 1416310_at   | 1421327_at   | 0.9855 |
| NUSAP1  | MTAP2  | 1416310_at   | 1421328_at   | 0.9358 |
| NUSAP1  | ZIK1   | 1416310_at   | 1421395_at   | 0.9838 |
| NUSAP1  | LRP8   | 1416310_at   | 1421459_a_at | 0.9457 |

|        |               |            |              |        |
|--------|---------------|------------|--------------|--------|
| NUSAP1 | SORCS1        | 1416310_at | 1421509_at   | 0.8140 |
| NUSAP1 | NPAS3         | 1416310_at | 1421567_at   | 0.9422 |
| NUSAP1 | CRKL          | 1416310_at | 1421953_at   | 0.9424 |
| NUSAP1 | NPTX1         | 1416310_at | 1422130_at   | 0.8546 |
| NUSAP1 | CDC25C        | 1416310_at | 1422252_a_at | 0.9121 |
| NUSAP1 | SF1           | 1416310_at | 1422321_a_at | 0.9447 |
| NUSAP1 | RAB23         | 1416310_at | 1422399_a_at | 0.9833 |
| NUSAP1 | ILF3          | 1416310_at | 1422546_at   | 0.8503 |
| NUSAP1 | HMGA2         | 1416310_at | 1422851_at   | 0.9023 |
| NUSAP1 | SUV39H2       | 1416310_at | 1422979_at   | 0.9621 |
| NUSAP1 | RAD51C        | 1416310_at | 1423026_at   | 0.9888 |
| NUSAP1 | INCENP        | 1416310_at | 1423093_at   | 0.9442 |
| NUSAP1 | RAD18         | 1416310_at | 1423318_at   | 0.8607 |
| NUSAP1 | SMARCC1       | 1416310_at | 1423417_at   | 0.9304 |
| NUSAP1 | D2ERTD750E    | 1416310_at | 1423464_at   | 0.9722 |
| NUSAP1 | SEPT2         | 1416310_at | 1423473_at   | 0.9352 |
| NUSAP1 | MASTL         | 1416310_at | 1423524_at   | 0.9837 |
| NUSAP1 | MASTL         | 1416310_at | 1423525_at   | 0.9722 |
| NUSAP1 | KCNC1         | 1416310_at | 1423559_at   | 0.8622 |
| NUSAP1 | TMEM48        | 1416310_at | 1424173_at   | 0.9852 |
| NUSAP1 | CAMKK2        | 1416310_at | 1424476_at   | 0.8046 |
| NUSAP1 | HIP1          | 1416310_at | 1424756_at   | 0.9822 |
| NUSAP1 | WDR62         | 1416310_at | 1424849_at   | 0.9324 |
| NUSAP1 | ATP6V0A1      | 1416310_at | 1425227_a_at | 0.8534 |
| NUSAP1 | HUS1          | 1416310_at | 1425366_a_at | 0.9401 |
| NUSAP1 | PSRC1         | 1416310_at | 1425416_s_at | 0.9758 |
| NUSAP1 | CD109         | 1416310_at | 1425658_at   | 0.9829 |
| NUSAP1 | CCDC77        | 1416310_at | 1425734_a_at | 0.9472 |
| NUSAP1 | FANCI         | 1416310_at | 1425941_a_at | 0.9699 |
| NUSAP1 | CDC7          | 1416310_at | 1426021_a_at | 0.9691 |
| NUSAP1 | PVT1          | 1416310_at | 1427140_at   | 0.8815 |
| NUSAP1 | RG9MTD2       | 1416310_at | 1427375_at   | 0.9369 |
| NUSAP1 | FANCI         | 1416310_at | 1427953_at   | 0.9587 |
| NUSAP1 | SRGAP2        | 1416310_at | 1427967_at   | 0.9834 |
| NUSAP1 | CAND1         | 1416310_at | 1428649_at   | 0.9524 |
| NUSAP1 | ZNF157        | 1416310_at | 1428887_at   | 0.9423 |
| NUSAP1 | RASL11A       | 1416310_at | 1429444_at   | 0.8682 |
| NUSAP1 | MCM8          | 1416310_at | 1429557_at   | 0.8965 |
| NUSAP1 | SMC2          | 1416310_at | 1429659_at   | 0.9583 |
| NUSAP1 | 6230416J20RIK | 1416310_at | 1429665_at   | 0.9333 |
| NUSAP1 | 4632434I11RIK | 1416310_at | 1429734_at   | 0.9738 |
| NUSAP1 | HELLS         | 1416310_at | 1430139_at   | 0.9084 |
| NUSAP1 | CEP70         | 1416310_at | 1430231_a_at | 0.9748 |
| NUSAP1 | NUP205        | 1416310_at | 1430343_at   | 0.9355 |
| NUSAP1 | TLE4          | 1416310_at | 1430384_at   | 0.8306 |
| NUSAP1 | NCAPD3        | 1416310_at | 1430782_at   | 0.8910 |
| NUSAP1 | TGIF2         | 1416310_at | 1431115_at   | 0.9149 |
| NUSAP1 | PGAP1         | 1416310_at | 1431169_at   | 0.9406 |
| NUSAP1 | DLG5          | 1416310_at | 1431187_s_at | 0.9355 |
| NUSAP1 | PVT1          | 1416310_at | 1431352_s_at | 0.8957 |
| NUSAP1 | JAM2          | 1416310_at | 1431416_a_at | 0.8714 |

|        |               |            |              |        |
|--------|---------------|------------|--------------|--------|
| NUSAP1 | 4933432K03RIK | 1416310_at | 1431489_at   | 0.8658 |
| NUSAP1 | 2610021K21RIK | 1416310_at | 1431667_s_at | 0.9265 |
| NUSAP1 | RAB31         | 1416310_at | 1431691_a_at | 0.9273 |
| NUSAP1 | PIGN          | 1416310_at | 1432115_a_at | 0.9670 |
| NUSAP1 | ERCC4         | 1416310_at | 1432272_a_at | 0.9810 |
| NUSAP1 | ARMC9         | 1416310_at | 1432383_a_at | 0.9717 |
| NUSAP1 | 1700106N22RIK | 1416310_at | 1432504_at   | 0.8958 |
| NUSAP1 | SUV39H2       | 1416310_at | 1433996_at   | 0.9171 |
| NUSAP1 | NPHP4         | 1416310_at | 1434024_at   | 0.9380 |
| NUSAP1 | SRGAP2        | 1416310_at | 1434407_at   | 0.8926 |
| NUSAP1 | SOX3          | 1416310_at | 1435192_at   | 0.8075 |
| NUSAP1 | EXOD1         | 1416310_at | 1435390_at   | 0.8682 |
| NUSAP1 | CD109         | 1416310_at | 1436346_at   | 0.9754 |
| NUSAP1 | CEP78         | 1416310_at | 1436352_at   | 0.8757 |
| NUSAP1 | ZBTB12        | 1416310_at | 1436382_at   | 0.9206 |
| NUSAP1 | SDC3          | 1416310_at | 1436482_a_at | 0.8336 |
| NUSAP1 | PIF1          | 1416310_at | 1436738_at   | 0.8783 |
| NUSAP1 | SOX11         | 1416310_at | 1436790_a_at | 0.8984 |
| NUSAP1 | ASCL1         | 1416310_at | 1437086_at   | 0.8730 |
| NUSAP1 | 2810408I11RIK | 1416310_at | 1437549_at   | 0.9534 |
| NUSAP1 | AV164956      | 1416310_at | 1437673_at   | 0.9413 |
| NUSAP1 | HEATR5B       | 1416310_at | 1438085_at   | 0.9296 |
| NUSAP1 | 4933432K03RIK | 1416310_at | 1438356_x_at | 0.9723 |
| NUSAP1 | RAD51C        | 1416310_at | 1438453_at   | 0.9055 |
| NUSAP1 | DHX33         | 1416310_at | 1438765_at   | 0.9658 |
| NUSAP1 | AH11          | 1416310_at | 1439083_at   | 0.8770 |
| NUSAP1 | FANCD2        | 1416310_at | 1439091_at   | 0.9180 |
| NUSAP1 | A1506816      | 1416310_at | 1439483_at   | 0.9806 |
| NUSAP1 | A1746468      | 1416310_at | 1439960_at   | 0.9667 |
| NUSAP1 | ABCC12        | 1416310_at | 1439985_at   | 0.8894 |
| NUSAP1 | A930024E05RIK | 1416310_at | 1440206_at   | 0.9588 |
| NUSAP1 | WDR35         | 1416310_at | 1440318_at   | 0.8117 |
| NUSAP1 | KIF20B        | 1416310_at | 1440924_at   | 0.9244 |
| NUSAP1 | A430071A18RIK | 1416310_at | 1441113_at   | 0.8225 |
| NUSAP1 | MATR3         | 1416310_at | 1441272_at   | 0.9164 |
| NUSAP1 | KBTBD8        | 1416310_at | 1441275_at   | 0.9607 |
| NUSAP1 | NKRF          | 1416310_at | 1441325_at   | 0.9778 |
| NUSAP1 | AU043080      | 1416310_at | 1441375_at   | 0.9515 |
| NUSAP1 | ASPM          | 1416310_at | 1441520_at   | 0.9258 |
| NUSAP1 | D2ERTD750E    | 1416310_at | 1442280_at   | 0.8923 |
| NUSAP1 | TAF1D         | 1416310_at | 1442289_at   | 0.8510 |
| NUSAP1 | NUP188        | 1416310_at | 1442314_at   | 0.8646 |
| NUSAP1 | TTK           | 1416310_at | 1442594_at   | 0.9813 |
| NUSAP1 | AW545941      | 1416310_at | 1443007_at   | 0.8431 |
| NUSAP1 | BB337104      | 1416310_at | 1443026_at   | 0.8728 |
| NUSAP1 | BB444561      | 1416310_at | 1443171_at   | 0.9525 |
| NUSAP1 | BB340127      | 1416310_at | 1443230_at   | 0.8034 |
| NUSAP1 | BB130444      | 1416310_at | 1443410_at   | 0.8871 |
| NUSAP1 | BM202761      | 1416310_at | 1443800_at   | 0.8432 |
| NUSAP1 | ZBTB39        | 1416310_at | 1443880_at   | 0.9358 |
| NUSAP1 | CDK5RAP2      | 1416310_at | 1443976_at   | 0.9097 |

|        |               |            |              |        |
|--------|---------------|------------|--------------|--------|
| NUSAP1 | ERCC6L        | 1416310_at | 1444024_at   | 0.9874 |
| NUSAP1 | AV228095      | 1416310_at | 1444443_at   | 0.9606 |
| NUSAP1 | 6530418L21RIK | 1416310_at | 1444723_at   | 0.9450 |
| NUSAP1 | MASTL         | 1416310_at | 1444725_at   | 0.9162 |
| NUSAP1 | BC023969      | 1416310_at | 1445226_at   | 0.9813 |
| NUSAP1 | C530044C16RIK | 1416310_at | 1445247_at   | 0.8376 |
| NUSAP1 | AV323315      | 1416310_at | 1445298_at   | 0.9068 |
| NUSAP1 | KCND3         | 1416310_at | 1447513_at   | 0.9905 |
| NUSAP1 | SEMA6D        | 1416310_at | 1448060_at   | 0.9182 |
| NUSAP1 | OGG1          | 1416310_at | 1448815_at   | 0.9391 |
| NUSAP1 | FOXM1         | 1416310_at | 1448834_at   | 0.9564 |
| NUSAP1 | SKP2          | 1416310_at | 1449293_a_at | 0.9857 |
| NUSAP1 | SOX4          | 1416310_at | 1449370_at   | 0.8557 |
| NUSAP1 | SUPT16H       | 1416310_at | 1449578_at   | 0.9356 |
| NUSAP1 | CCNB1         | 1416310_at | 1449675_at   | 0.9821 |
| NUSAP1 | LFNG          | 1416310_at | 1449943_at   | 0.9188 |
| NUSAP1 | APC           | 1416310_at | 1450056_at   | 0.8897 |
| NUSAP1 | 4933411K20RIK | 1416310_at | 1450076_at   | 0.9733 |
| NUSAP1 | TCERG1        | 1416310_at | 1450100_a_at | 0.9783 |
| NUSAP1 | ASCL1         | 1416310_at | 1450164_at   | 0.9566 |
| NUSAP1 | PCDHB11       | 1416310_at | 1450270_at   | 0.8097 |
| NUSAP1 | NPAS3         | 1416310_at | 1450287_at   | 0.8126 |
| NUSAP1 | ZFP354C       | 1416310_at | 1450321_at   | 0.9332 |
| NUSAP1 | SHC3          | 1416310_at | 1450326_at   | 0.8765 |
| NUSAP1 | MYBL1         | 1416310_at | 1450481_at   | 0.9217 |
| NUSAP1 | SOX3          | 1416310_at | 1450485_at   | 0.9590 |
| NUSAP1 | SALL1         | 1416310_at | 1450489_at   | 0.8305 |
| NUSAP1 | HMGA2         | 1416310_at | 1450780_s_at | 0.8955 |
| NUSAP1 | ZNF451        | 1416310_at | 1451816_at   | 0.8962 |
| NUSAP1 | NCOR2         | 1416310_at | 1451841_a_at | 0.9510 |
| NUSAP1 | LMNB2         | 1416310_at | 1451849_a_at | 0.8733 |
| NUSAP1 | ZFP2          | 1416310_at | 1452025_a_at | 0.9369 |
| NUSAP1 | 6720460F02RIK | 1416310_at | 1452073_at   | 0.9521 |
| NUSAP1 | ZBED3         | 1416310_at | 1452088_at   | 0.8606 |
| NUSAP1 | RRP1B         | 1416310_at | 1452119_at   | 0.9129 |
| NUSAP1 | NOVA1         | 1416310_at | 1452245_at   | 0.8699 |
| NUSAP1 | PVT1          | 1416310_at | 1452324_at   | 0.8085 |
| NUSAP1 | CENPF         | 1416310_at | 1452334_at   | 0.9176 |
| NUSAP1 | ADAMTS7       | 1416310_at | 1452339_at   | 0.8280 |
| NUSAP1 | ASPM          | 1416310_at | 1452459_at   | 0.9651 |
| NUSAP1 | MLF1IP        | 1416310_at | 1452816_at   | 0.8734 |
| NUSAP1 | TTF2          | 1416310_at | 1452818_at   | 0.9446 |
| NUSAP1 | TMEM138       | 1416310_at | 1452978_at   | 0.8809 |
| NUSAP1 | RHOBTB3       | 1416310_at | 1453227_at   | 0.9898 |
| NUSAP1 | CALR3         | 1416310_at | 1453232_at   | 0.8361 |
| NUSAP1 | HELLS         | 1416310_at | 1453361_at   | 0.8202 |
| NUSAP1 | TROAP         | 1416310_at | 1453370_at   | 0.9696 |
| NUSAP1 | CEP55         | 1416310_at | 1453683_a_at | 0.9722 |
| NUSAP1 | DHX38         | 1416310_at | 1453751_at   | 0.9634 |
| NUSAP1 | PHF6          | 1416310_at | 1453761_at   | 0.9787 |
| NUSAP1 | FAM110A       | 1416310_at | 1453768_a_at | 0.8662 |

|         |                       |              |                       |        |
|---------|-----------------------|--------------|-----------------------|--------|
| NUSAP1  | NETO2                 | 1416310_at   | 1454032_at            | 0.9048 |
| NUSAP1  | CCDC77                | 1416310_at   | 1454228_a_at          | 0.9311 |
| NUSAP1  | EXOD1                 | 1416310_at   | 1454229_a_at          | 0.9872 |
| NUSAP1  | XKR5                  | 1416310_at   | 1455127_at            | 0.8456 |
| NUSAP1  | UTP23                 | 1416310_at   | 1455259_a_at          | 0.9538 |
| NUSAP1  | ATP5G2                | 1416310_at   | 1456128_at            | 0.8420 |
| NUSAP1  | 2700049P18RIK         | 1416310_at   | 1456163_at            | 0.9413 |
| NUSAP1  | RTEL1                 | 1416310_at   | 1456729_x_at          | 0.8540 |
| NUSAP1  | BB053540              | 1416310_at   | 1456840_at            | 0.8694 |
| NUSAP1  | AV254764              | 1416310_at   | 1456951_at            | 0.8808 |
| NUSAP1  | TAF2                  | 1416310_at   | 1457351_at            | 0.9804 |
| NUSAP1  | ZNF69                 | 1416310_at   | 1458274_at            | 0.8784 |
| NUSAP1  | MTR                   | 1416310_at   | 1458532_at            | 0.8587 |
| NUSAP1  | RNF219                | 1416310_at   | 1458636_at            | 0.9724 |
| NUSAP1  | BB463474              | 1416310_at   | 1458902_at            | 0.8183 |
| NUSAP1  | 6530418L21RIK         | 1416310_at   | 1459051_at            | 0.8850 |
| NUSAP1  | AFFX-DapX-5_at        | 1416310_at   | AFFX-DapX-5_at        | 0.9208 |
| NUSAP1  | AFFX-LysX-5_at        | 1416310_at   | AFFX-LysX-5_at        | 0.8815 |
| NUSAP1  | AFFX-PheX-5_at        | 1416310_at   | AFFX-PheX-5_at        | 0.8050 |
| NUSAP1  | AFFX-r2-Bs-dap-5_at   | 1416310_at   | AFFX-r2-Bs-dap-5_at   | 0.9104 |
| NUSAP1  | AFFX-r2-Bs-lys-5_at   | 1416310_at   | AFFX-r2-Bs-lys-5_at   | 0.9097 |
| NUSAP1  | AFFX-r2-Bs-thr-5_s_at | 1416310_at   | AFFX-r2-Bs-thr-5_s_at | 0.8938 |
| NUSAP1  | AFFX-ThrX-5_at        | 1416310_at   | AFFX-ThrX-5_at        | 0.9026 |
| SETDB1  | FSCN1                 | 1416670_at   | 1416515_at            | 0.9051 |
| RCOR2   | FSCN1                 | 1417302_at   | 1416515_at            | 0.8825 |
| PSRC1   | FSCN1                 | 1417323_at   | 1416515_at            | 0.8478 |
| ETV5    | FSCN1                 | 1420998_at   | 1416515_at            | 0.8409 |
| ZIK1    | FSCN1                 | 1421395_at   | 1416515_at            | 0.8903 |
| NPAS3   | FSCN1                 | 1421567_at   | 1416515_at            | 0.8883 |
| SF1     | FSCN1                 | 1422321_a_at | 1416515_at            | 0.8640 |
| ILF3    | FSCN1                 | 1422546_at   | 1416515_at            | 0.8894 |
| HMGA2   | FSCN1                 | 1422851_at   | 1416515_at            | 0.8005 |
| SUV39H2 | FSCN1                 | 1422979_at   | 1416515_at            | 0.8674 |
| RAD51C  | FSCN1                 | 1423026_at   | 1416515_at            | 0.9080 |
| SMARCC1 | FSCN1                 | 1423417_at   | 1416515_at            | 0.8701 |
| HIP1    | FSCN1                 | 1424756_at   | 1416515_at            | 0.8952 |
| PSRC1   | FSCN1                 | 1425416_s_at | 1416515_at            | 0.9109 |
| CAND1   | FSCN1                 | 1428649_at   | 1416515_at            | 0.8687 |
| ZNF157  | FSCN1                 | 1428887_at   | 1416515_at            | 0.9008 |
| MCM8    | FSCN1                 | 1429557_at   | 1416515_at            | 0.8967 |
| HELLS   | FSCN1                 | 1430139_at   | 1416515_at            | 0.8202 |
| ERCC4   | FSCN1                 | 1432272_a_at | 1416515_at            | 0.9143 |
| SUV39H2 | FSCN1                 | 1433996_at   | 1416515_at            | 0.8203 |
| SOX11   | FSCN1                 | 1436790_a_at | 1416515_at            | 0.8420 |
| RAD51C  | FSCN1                 | 1438453_at   | 1416515_at            | 0.8290 |
| NKRF    | FSCN1                 | 1441325_at   | 1416515_at            | 0.8981 |
| FOXM1   | FSCN1                 | 1448834_at   | 1416515_at            | 0.8591 |
| SOX4    | FSCN1                 | 1449370_at   | 1416515_at            | 0.8115 |
| SUPT16H | FSCN1                 | 1449578_at   | 1416515_at            | 0.8542 |
| TCERG1  | FSCN1                 | 1450100_a_at | 1416515_at            | 0.8968 |
| ASCL1   | FSCN1                 | 1450164_at   | 1416515_at            | 0.8883 |

|         |            |              |              |        |
|---------|------------|--------------|--------------|--------|
| ZFP354C | FSCN1      | 1450321_at   | 1416515_at   | 0.8855 |
| MYBL1   | FSCN1      | 1450481_at   | 1416515_at   | 0.8240 |
| SOX3    | FSCN1      | 1450485_at   | 1416515_at   | 0.8965 |
| NCOR2   | FSCN1      | 1451841_a_at | 1416515_at   | 0.8975 |
| ZFP2    | FSCN1      | 1452025_a_at | 1416515_at   | 0.9153 |
| CENPF   | FSCN1      | 1452334_at   | 1416515_at   | 0.8618 |
| TTF2    | FSCN1      | 1452818_at   | 1416515_at   | 0.8288 |
| PHF6    | FSCN1      | 1453761_at   | 1416515_at   | 0.8884 |
| TAF2    | FSCN1      | 1457351_at   | 1416515_at   | 0.8960 |
| SETDB1  | GTSE1      | 1416670_at   | 1416969_at   | 0.9626 |
| SETDB1  | CSTF1      | 1416670_at   | 1417117_at   | 0.8581 |
| SETDB1  | VAV3       | 1416670_at   | 1417123_at   | 0.9787 |
| SETDB1  | RCOR2      | 1416670_at   | 1417302_at   | 0.9104 |
| SETDB1  | PSRC1      | 1416670_at   | 1417323_at   | 0.9090 |
| SETDB1  | SART3      | 1416670_at   | 1417548_at   | 0.9383 |
| SETDB1  | INTS5      | 1416670_at   | 1417887_at   | 0.8974 |
| SETDB1  | EXO1       | 1416670_at   | 1418027_at   | 0.9878 |
| SETDB1  | CENPM      | 1416670_at   | 1418184_at   | 0.9549 |
| SETDB1  | TSGA14     | 1416670_at   | 1419686_at   | 0.9309 |
| SETDB1  | PEG12      | 1416670_at   | 1420406_at   | 0.8805 |
| SETDB1  | EIF2S1     | 1416670_at   | 1420491_at   | 0.8080 |
| SETDB1  | GALC       | 1416670_at   | 1420547_at   | 0.9641 |
| SETDB1  | WNT7B      | 1416670_at   | 1420891_at   | 0.8582 |
| SETDB1  | ETV5       | 1416670_at   | 1420998_at   | 0.9374 |
| SETDB1  | ADAM12     | 1416670_at   | 1421171_at   | 0.9512 |
| SETDB1  | ADAM12     | 1416670_at   | 1421172_at   | 0.8136 |
| SETDB1  | MTAP2      | 1416670_at   | 1421327_at   | 0.9736 |
| SETDB1  | MTAP2      | 1416670_at   | 1421328_at   | 0.9306 |
| SETDB1  | ZIK1       | 1416670_at   | 1421395_at   | 0.9842 |
| SETDB1  | LRP8       | 1416670_at   | 1421459_a_at | 0.9741 |
| SETDB1  | NPAS3      | 1416670_at   | 1421567_at   | 0.9239 |
| SETDB1  | CRKL       | 1416670_at   | 1421953_at   | 0.9613 |
| SETDB1  | NPTX1      | 1416670_at   | 1422130_at   | 0.8494 |
| SETDB1  | CDC25C     | 1416670_at   | 1422252_a_at | 0.9014 |
| SETDB1  | SF1        | 1416670_at   | 1422321_a_at | 0.9175 |
| SETDB1  | RAB23      | 1416670_at   | 1422399_a_at | 0.9808 |
| SETDB1  | ILF3       | 1416670_at   | 1422546_at   | 0.8521 |
| SETDB1  | HMGA2      | 1416670_at   | 1422851_at   | 0.8939 |
| SETDB1  | SUV39H2    | 1416670_at   | 1422979_at   | 0.9545 |
| SETDB1  | RAD51C     | 1416670_at   | 1423026_at   | 0.9875 |
| SETDB1  | INCENP     | 1416670_at   | 1423093_at   | 0.9534 |
| SETDB1  | RAD18      | 1416670_at   | 1423318_at   | 0.8637 |
| SETDB1  | SMARCC1    | 1416670_at   | 1423417_at   | 0.9520 |
| SETDB1  | D2ERTD750E | 1416670_at   | 1423464_at   | 0.9628 |
| SETDB1  | SEPT2      | 1416670_at   | 1423473_at   | 0.9318 |
| SETDB1  | MASTL      | 1416670_at   | 1423524_at   | 0.9828 |
| SETDB1  | MASTL      | 1416670_at   | 1423525_at   | 0.9665 |
| SETDB1  | KCNC1      | 1416670_at   | 1423559_at   | 0.8686 |
| SETDB1  | TMEM48     | 1416670_at   | 1424173_at   | 0.9734 |
| SETDB1  | CAMKK2     | 1416670_at   | 1424476_at   | 0.8074 |
| SETDB1  | HIP1       | 1416670_at   | 1424756_at   | 0.9857 |

|        |               |            |              |        |
|--------|---------------|------------|--------------|--------|
| SETDB1 | WDR62         | 1416670_at | 1424849_at   | 0.9593 |
| SETDB1 | ATP6V0A1      | 1416670_at | 1425227_a_at | 0.8616 |
| SETDB1 | HUS1          | 1416670_at | 1425366_a_at | 0.9452 |
| SETDB1 | PSRC1         | 1416670_at | 1425416_s_at | 0.9586 |
| SETDB1 | CD109         | 1416670_at | 1425658_at   | 0.9755 |
| SETDB1 | CCDC77        | 1416670_at | 1425734_a_at | 0.9462 |
| SETDB1 | FANCI         | 1416670_at | 1425941_a_at | 0.9901 |
| SETDB1 | CDC7          | 1416670_at | 1426021_a_at | 0.9623 |
| SETDB1 | PVT1          | 1416670_at | 1427140_at   | 0.8690 |
| SETDB1 | RG9MTD2       | 1416670_at | 1427375_at   | 0.9304 |
| SETDB1 | FANCI         | 1416670_at | 1427953_at   | 0.9579 |
| SETDB1 | SRGAP2        | 1416670_at | 1427967_at   | 0.9829 |
| SETDB1 | CAND1         | 1416670_at | 1428649_at   | 0.9391 |
| SETDB1 | ZNF157        | 1416670_at | 1428887_at   | 0.9250 |
| SETDB1 | RASL11A       | 1416670_at | 1429444_at   | 0.8318 |
| SETDB1 | MCM8          | 1416670_at | 1429557_at   | 0.8981 |
| SETDB1 | SMC2          | 1416670_at | 1429659_at   | 0.9812 |
| SETDB1 | 6230416J20RIK | 1416670_at | 1429665_at   | 0.9251 |
| SETDB1 | 4632434I11RIK | 1416670_at | 1429734_at   | 0.9696 |
| SETDB1 | HELLS         | 1416670_at | 1430139_at   | 0.9066 |
| SETDB1 | CEP70         | 1416670_at | 1430231_a_at | 0.9587 |
| SETDB1 | NUP205        | 1416670_at | 1430343_at   | 0.9722 |
| SETDB1 | TLE4          | 1416670_at | 1430384_at   | 0.8223 |
| SETDB1 | NCAPD3        | 1416670_at | 1430782_at   | 0.9207 |
| SETDB1 | TGIF2         | 1416670_at | 1431115_at   | 0.9043 |
| SETDB1 | PGAP1         | 1416670_at | 1431169_at   | 0.9432 |
| SETDB1 | DLG5          | 1416670_at | 1431187_s_at | 0.9341 |
| SETDB1 | PVT1          | 1416670_at | 1431352_s_at | 0.8845 |
| SETDB1 | JAM2          | 1416670_at | 1431416_a_at | 0.8508 |
| SETDB1 | 4933432K03RIK | 1416670_at | 1431489_at   | 0.8487 |
| SETDB1 | 2610021K21RIK | 1416670_at | 1431667_s_at | 0.9632 |
| SETDB1 | RAB31         | 1416670_at | 1431691_a_at | 0.9051 |
| SETDB1 | PIGN          | 1416670_at | 1432115_a_at | 0.9782 |
| SETDB1 | ERCC4         | 1416670_at | 1432272_a_at | 0.9810 |
| SETDB1 | ARMC9         | 1416670_at | 1432383_a_at | 0.9640 |
| SETDB1 | 1700106N22RIK | 1416670_at | 1432504_at   | 0.8804 |
| SETDB1 | TROAP         | 1416670_at | 1433790_at   | 0.8095 |
| SETDB1 | SUV39H2       | 1416670_at | 1433996_at   | 0.9347 |
| SETDB1 | NPHP4         | 1416670_at | 1434024_at   | 0.9437 |
| SETDB1 | SRGAP2        | 1416670_at | 1434407_at   | 0.9024 |
| SETDB1 | EXOD1         | 1416670_at | 1435390_at   | 0.8684 |
| SETDB1 | GEMIN5        | 1416670_at | 1436311_at   | 0.8180 |
| SETDB1 | CD109         | 1416670_at | 1436346_at   | 0.9586 |
| SETDB1 | CEP78         | 1416670_at | 1436352_at   | 0.8639 |
| SETDB1 | ZBTB12        | 1416670_at | 1436382_at   | 0.9256 |
| SETDB1 | SDC3          | 1416670_at | 1436482_a_at | 0.8250 |
| SETDB1 | PIF1          | 1416670_at | 1436738_at   | 0.8759 |
| SETDB1 | SOX11         | 1416670_at | 1436790_a_at | 0.8899 |
| SETDB1 | ASCL1         | 1416670_at | 1437086_at   | 0.8506 |
| SETDB1 | 2810408I11RIK | 1416670_at | 1437549_at   | 0.9588 |
| SETDB1 | AV164956      | 1416670_at | 1437673_at   | 0.9113 |



|        |               |            |              |        |
|--------|---------------|------------|--------------|--------|
| SETDB1 | HEATR1        | 1416670_at | 1437965_at   | 0.8069 |
| SETDB1 | HEATR5B       | 1416670_at | 1438085_at   | 0.9648 |
| SETDB1 | 4933432K03RIK | 1416670_at | 1438356_x_at | 0.9769 |
| SETDB1 | RAD51C        | 1416670_at | 1438453_at   | 0.9074 |
| SETDB1 | DHX33         | 1416670_at | 1438765_at   | 0.9556 |
| SETDB1 | AHI1          | 1416670_at | 1439083_at   | 0.8745 |
| SETDB1 | FANCD2        | 1416670_at | 1439091_at   | 0.9320 |
| SETDB1 | AI506816      | 1416670_at | 1439483_at   | 0.9700 |
| SETDB1 | AI746468      | 1416670_at | 1439960_at   | 0.9705 |
| SETDB1 | ABCC12        | 1416670_at | 1439985_at   | 0.8810 |
| SETDB1 | A930024E05RIK | 1416670_at | 1440206_at   | 0.9589 |
| SETDB1 | WDR35         | 1416670_at | 1440318_at   | 0.8141 |
| SETDB1 | KIF20B        | 1416670_at | 1440924_at   | 0.9509 |
| SETDB1 | MATR3         | 1416670_at | 1441272_at   | 0.9263 |
| SETDB1 | KBTBD8        | 1416670_at | 1441275_at   | 0.9622 |
| SETDB1 | NKRF          | 1416670_at | 1441325_at   | 0.9921 |
| SETDB1 | AU043080      | 1416670_at | 1441375_at   | 0.9694 |
| SETDB1 | ASPM          | 1416670_at | 1441520_at   | 0.9486 |
| SETDB1 | D2ERTD750E    | 1416670_at | 1442280_at   | 0.8671 |
| SETDB1 | TAF1D         | 1416670_at | 1442289_at   | 0.8694 |
| SETDB1 | NUP188        | 1416670_at | 1442314_at   | 0.9125 |
| SETDB1 | TTK           | 1416670_at | 1442594_at   | 0.9829 |
| SETDB1 | AW545941      | 1416670_at | 1443007_at   | 0.8544 |
| SETDB1 | BB337104      | 1416670_at | 1443026_at   | 0.8580 |
| SETDB1 | BB444561      | 1416670_at | 1443171_at   | 0.9511 |
| SETDB1 | BB340127      | 1416670_at | 1443230_at   | 0.8130 |
| SETDB1 | BB130444      | 1416670_at | 1443410_at   | 0.8604 |
| SETDB1 | BM202761      | 1416670_at | 1443800_at   | 0.8478 |
| SETDB1 | ZBTB39        | 1416670_at | 1443880_at   | 0.9292 |
| SETDB1 | CDK5RAP2      | 1416670_at | 1443976_at   | 0.9110 |
| SETDB1 | ERCC6L        | 1416670_at | 1444024_at   | 0.9935 |
| SETDB1 | AV228095      | 1416670_at | 1444443_at   | 0.9606 |
| SETDB1 | 6530418L21RIK | 1416670_at | 1444723_at   | 0.9304 |
| SETDB1 | MASTL         | 1416670_at | 1444725_at   | 0.9259 |
| SETDB1 | BC023969      | 1416670_at | 1445226_at   | 0.9742 |
| SETDB1 | C530044C16RIK | 1416670_at | 1445247_at   | 0.8214 |
| SETDB1 | AV323315      | 1416670_at | 1445298_at   | 0.9059 |
| SETDB1 | KCND3         | 1416670_at | 1447513_at   | 0.9831 |
| SETDB1 | SEMA6D        | 1416670_at | 1448060_at   | 0.9087 |
| SETDB1 | OGG1          | 1416670_at | 1448815_at   | 0.9509 |
| SETDB1 | FOXN1         | 1416670_at | 1448834_at   | 0.9436 |
| SETDB1 | SKP2          | 1416670_at | 1449293_a_at | 0.9886 |
| SETDB1 | SOX4          | 1416670_at | 1449370_at   | 0.8478 |
| SETDB1 | SUPT16H       | 1416670_at | 1449578_at   | 0.9371 |
| SETDB1 | CCNB1         | 1416670_at | 1449675_at   | 0.9775 |
| SETDB1 | LFNG          | 1416670_at | 1449943_at   | 0.8987 |
| SETDB1 | APC           | 1416670_at | 1450056_at   | 0.8891 |
| SETDB1 | 4933411K20RIK | 1416670_at | 1450076_at   | 0.9727 |
| SETDB1 | TCERG1        | 1416670_at | 1450100_a_at | 0.9865 |
| SETDB1 | ASCL1         | 1416670_at | 1450164_at   | 0.9534 |
| SETDB1 | ZFP354C       | 1416670_at | 1450321_at   | 0.9425 |

|        |                       |            |                       |        |
|--------|-----------------------|------------|-----------------------|--------|
| SETDB1 | SHC3                  | 1416670_at | 1450326_at            | 0.8515 |
| SETDB1 | MED1                  | 1416670_at | 1450402_at            | 0.8172 |
| SETDB1 | MYBL1                 | 1416670_at | 1450481_at            | 0.9323 |
| SETDB1 | SOX3                  | 1416670_at | 1450485_at            | 0.9657 |
| SETDB1 | SALL1                 | 1416670_at | 1450489_at            | 0.8283 |
| SETDB1 | HMGA2                 | 1416670_at | 1450780_s_at          | 0.9045 |
| SETDB1 | ZNF451                | 1416670_at | 1451816_at            | 0.9049 |
| SETDB1 | NCOR2                 | 1416670_at | 1451841_a_at          | 0.9403 |
| SETDB1 | LMNB2                 | 1416670_at | 1451849_a_at          | 0.8859 |
| SETDB1 | ZFP2                  | 1416670_at | 1452025_a_at          | 0.9366 |
| SETDB1 | 6720460F02RIK         | 1416670_at | 1452073_at            | 0.9335 |
| SETDB1 | ZBED3                 | 1416670_at | 1452088_at            | 0.8661 |
| SETDB1 | RRP1B                 | 1416670_at | 1452119_at            | 0.9067 |
| SETDB1 | NOVA1                 | 1416670_at | 1452245_at            | 0.8397 |
| SETDB1 | CENPF                 | 1416670_at | 1452334_at            | 0.9350 |
| SETDB1 | ADAMTS7               | 1416670_at | 1452339_at            | 0.8277 |
| SETDB1 | ASPM                  | 1416670_at | 1452459_at            | 0.9638 |
| SETDB1 | MLF1IP                | 1416670_at | 1452816_at            | 0.8993 |
| SETDB1 | TTF2                  | 1416670_at | 1452818_at            | 0.9504 |
| SETDB1 | TMEM138               | 1416670_at | 1452978_at            | 0.9079 |
| SETDB1 | RHOBTB3               | 1416670_at | 1453227_at            | 0.9804 |
| SETDB1 | HELLS                 | 1416670_at | 1453361_at            | 0.8394 |
| SETDB1 | TROAP                 | 1416670_at | 1453370_at            | 0.9809 |
| SETDB1 | CEP55                 | 1416670_at | 1453683_a_at          | 0.9689 |
| SETDB1 | DHX38                 | 1416670_at | 1453751_at            | 0.9846 |
| SETDB1 | PHF6                  | 1416670_at | 1453761_at            | 0.9696 |
| SETDB1 | FAM110A               | 1416670_at | 1453768_a_at          | 0.8642 |
| SETDB1 | NETO2                 | 1416670_at | 1454032_at            | 0.8848 |
| SETDB1 | CCDC77                | 1416670_at | 1454228_a_at          | 0.9218 |
| SETDB1 | EXOD1                 | 1416670_at | 1454229_a_at          | 0.9837 |
| SETDB1 | XKR5                  | 1416670_at | 1455127_at            | 0.8501 |
| SETDB1 | UTP23                 | 1416670_at | 1455259_a_at          | 0.9649 |
| SETDB1 | ATP5G2                | 1416670_at | 1456128_at            | 0.8185 |
| SETDB1 | 2700049P18RIK         | 1416670_at | 1456163_at            | 0.9432 |
| SETDB1 | RTEL1                 | 1416670_at | 1456729_x_at          | 0.8525 |
| SETDB1 | BB053540              | 1416670_at | 1456840_at            | 0.8580 |
| SETDB1 | AV254764              | 1416670_at | 1456951_at            | 0.8779 |
| SETDB1 | TAF2                  | 1416670_at | 1457351_at            | 0.9892 |
| SETDB1 | ZNF69                 | 1416670_at | 1458274_at            | 0.9091 |
| SETDB1 | MTR                   | 1416670_at | 1458532_at            | 0.9030 |
| SETDB1 | RNF219                | 1416670_at | 1458636_at            | 0.9733 |
| SETDB1 | BB463474              | 1416670_at | 1458902_at            | 0.8249 |
| SETDB1 | 6530418L21RIK         | 1416670_at | 1459051_at            | 0.8694 |
| SETDB1 | AFFX-DapX-5_at        | 1416670_at | AFFX-DapX-5_at        | 0.9078 |
| SETDB1 | AFFX-LysX-5_at        | 1416670_at | AFFX-LysX-5_at        | 0.8767 |
| SETDB1 | AFFX-r2-Bs-dap-5_at   | 1416670_at | AFFX-r2-Bs-dap-5_at   | 0.8977 |
| SETDB1 | AFFX-r2-Bs-lys-5_at   | 1416670_at | AFFX-r2-Bs-lys-5_at   | 0.8949 |
| SETDB1 | AFFX-r2-Bs-thr-5_s_at | 1416670_at | AFFX-r2-Bs-thr-5_s_at | 0.8870 |
| SETDB1 | AFFX-ThrX-5_at        | 1416670_at | AFFX-ThrX-5_at        | 0.8903 |
| RCOR2  | GTSE1                 | 1417302_at | 1416969_at            | 0.8973 |
| PSRC1  | GTSE1                 | 1417323_at | 1416969_at            | 0.9616 |

|         |       |              |            |        |
|---------|-------|--------------|------------|--------|
| ETV5    | GTSE1 | 1420998_at   | 1416969_at | 0.9488 |
| ATN1    | GTSE1 | 1421149_a_at | 1416969_at | 0.8299 |
| ZIK1    | GTSE1 | 1421395_at   | 1416969_at | 0.9552 |
| NPAS3   | GTSE1 | 1421567_at   | 1416969_at | 0.9338 |
| SF1     | GTSE1 | 1422321_a_at | 1416969_at | 0.9278 |
| ILF3    | GTSE1 | 1422546_at   | 1416969_at | 0.8156 |
| HMGA2   | GTSE1 | 1422851_at   | 1416969_at | 0.9062 |
| SUV39H2 | GTSE1 | 1422979_at   | 1416969_at | 0.9247 |
| RAD51C  | GTSE1 | 1423026_at   | 1416969_at | 0.9636 |
| RAD18   | GTSE1 | 1423318_at   | 1416969_at | 0.8417 |
| SMARCC1 | GTSE1 | 1423417_at   | 1416969_at | 0.9133 |
| HIP1    | GTSE1 | 1424756_at   | 1416969_at | 0.9706 |
| PSRC1   | GTSE1 | 1425416_s_at | 1416969_at | 0.9593 |
| CAND1   | GTSE1 | 1428649_at   | 1416969_at | 0.9272 |
| ZNF157  | GTSE1 | 1428887_at   | 1416969_at | 0.9251 |
| MCM8    | GTSE1 | 1429557_at   | 1416969_at | 0.8700 |
| HELLS   | GTSE1 | 1430139_at   | 1416969_at | 0.9527 |
| TLE4    | GTSE1 | 1430384_at   | 1416969_at | 0.8210 |
| TGIF2   | GTSE1 | 1431115_at   | 1416969_at | 0.9087 |
| ERCC4   | GTSE1 | 1432272_a_at | 1416969_at | 0.9601 |
| SUV39H2 | GTSE1 | 1433996_at   | 1416969_at | 0.9173 |
| SOX3    | GTSE1 | 1435192_at   | 1416969_at | 0.8549 |
| PIF1    | GTSE1 | 1436738_at   | 1416969_at | 0.8996 |
| SOX11   | GTSE1 | 1436790_a_at | 1416969_at | 0.9068 |
| ASCL1   | GTSE1 | 1437086_at   | 1416969_at | 0.9172 |
| RAD51C  | GTSE1 | 1438453_at   | 1416969_at | 0.9215 |
| NKRF    | GTSE1 | 1441325_at   | 1416969_at | 0.9571 |
| TAF1D   | GTSE1 | 1442289_at   | 1416969_at | 0.8307 |
| FOXM1   | GTSE1 | 1448834_at   | 1416969_at | 0.9740 |
| SOX4    | GTSE1 | 1449370_at   | 1416969_at | 0.8568 |
| SUPT16H | GTSE1 | 1449578_at   | 1416969_at | 0.9134 |
| TCERG1  | GTSE1 | 1450100_a_at | 1416969_at | 0.9482 |
| ASCL1   | GTSE1 | 1450164_at   | 1416969_at | 0.9791 |
| NPAS3   | GTSE1 | 1450287_at   | 1416969_at | 0.8286 |
| ZFP354C | GTSE1 | 1450321_at   | 1416969_at | 0.9226 |
| MYBL1   | GTSE1 | 1450481_at   | 1416969_at | 0.8931 |
| SOX3    | GTSE1 | 1450485_at   | 1416969_at | 0.9519 |
| HMGA2   | GTSE1 | 1450780_s_at | 1416969_at | 0.9198 |
| ZNF451  | GTSE1 | 1451816_at   | 1416969_at | 0.8721 |
| NCOR2   | GTSE1 | 1451841_a_at | 1416969_at | 0.9424 |
| ZFP2    | GTSE1 | 1452025_a_at | 1416969_at | 0.9244 |
| ZBED3   | GTSE1 | 1452088_at   | 1416969_at | 0.8368 |
| CENPF   | GTSE1 | 1452334_at   | 1416969_at | 0.9171 |
| MLF1IP  | GTSE1 | 1452816_at   | 1416969_at | 0.8713 |
| TTF2    | GTSE1 | 1452818_at   | 1416969_at | 0.9379 |
| HELLS   | GTSE1 | 1453361_at   | 1416969_at | 0.8080 |
| PHF6    | GTSE1 | 1453761_at   | 1416969_at | 0.9462 |
| TAF2    | GTSE1 | 1457351_at   | 1416969_at | 0.9501 |
| ZNF69   | GTSE1 | 1458274_at   | 1416969_at | 0.8790 |
| RCOR2   | CSTF1 | 1417302_at   | 1417117_at | 0.8458 |
| PSRC1   | CSTF1 | 1417323_at   | 1417117_at | 0.8243 |

|         |       |              |            |        |
|---------|-------|--------------|------------|--------|
| ETV5    | CSTF1 | 1420998_at   | 1417117_at | 0.9115 |
| ZIK1    | CSTF1 | 1421395_at   | 1417117_at | 0.8511 |
| NPAS3   | CSTF1 | 1421567_at   | 1417117_at | 0.9163 |
| SF1     | CSTF1 | 1422321_a_at | 1417117_at | 0.9084 |
| HMGA2   | CSTF1 | 1422851_at   | 1417117_at | 0.8518 |
| SUV39H2 | CSTF1 | 1422979_at   | 1417117_at | 0.8254 |
| RAD51C  | CSTF1 | 1423026_at   | 1417117_at | 0.8591 |
| RAD18   | CSTF1 | 1423318_at   | 1417117_at | 0.8026 |
| SMARCC1 | CSTF1 | 1423417_at   | 1417117_at | 0.8298 |
| HIP1    | CSTF1 | 1424756_at   | 1417117_at | 0.8997 |
| PSRC1   | CSTF1 | 1425416_s_at | 1417117_at | 0.8538 |
| CAND1   | CSTF1 | 1428649_at   | 1417117_at | 0.9081 |
| ZNF157  | CSTF1 | 1428887_at   | 1417117_at | 0.8410 |
| HELLS   | CSTF1 | 1430139_at   | 1417117_at | 0.8173 |
| TGIF2   | CSTF1 | 1431115_at   | 1417117_at | 0.8525 |
| ERCC4   | CSTF1 | 1432272_a_at | 1417117_at | 0.8683 |
| PIF1    | CSTF1 | 1436738_at   | 1417117_at | 0.8454 |
| RAD51C  | CSTF1 | 1438453_at   | 1417117_at | 0.8059 |
| NKRF    | CSTF1 | 1441325_at   | 1417117_at | 0.8668 |
| TAF1D   | CSTF1 | 1442289_at   | 1417117_at | 0.8091 |
| FOXM1   | CSTF1 | 1448834_at   | 1417117_at | 0.8449 |
| SUPT16H | CSTF1 | 1449578_at   | 1417117_at | 0.8213 |
| TCERG1  | CSTF1 | 1450100_a_at | 1417117_at | 0.8545 |
| ASCL1   | CSTF1 | 1450164_at   | 1417117_at | 0.8793 |
| ZFP354C | CSTF1 | 1450321_at   | 1417117_at | 0.8404 |
| MYBL1   | CSTF1 | 1450481_at   | 1417117_at | 0.8215 |
| SOX3    | CSTF1 | 1450485_at   | 1417117_at | 0.9020 |
| HMGA2   | CSTF1 | 1450780_s_at | 1417117_at | 0.8485 |
| HMGA2   | CSTF1 | 1450781_at   | 1417117_at | 0.8066 |
| ZNF451  | CSTF1 | 1451816_at   | 1417117_at | 0.8380 |
| NCOR2   | CSTF1 | 1451841_a_at | 1417117_at | 0.8879 |
| ZFP2    | CSTF1 | 1452025_a_at | 1417117_at | 0.8398 |
| ZBED3   | CSTF1 | 1452088_at   | 1417117_at | 0.8061 |
| TTF2    | CSTF1 | 1452818_at   | 1417117_at | 0.8768 |
| HELLS   | CSTF1 | 1453361_at   | 1417117_at | 0.8559 |
| PHF6    | CSTF1 | 1453761_at   | 1417117_at | 0.8561 |
| TAF2    | CSTF1 | 1457351_at   | 1417117_at | 0.8399 |
| ZNF69   | CSTF1 | 1458274_at   | 1417117_at | 0.8059 |
| RCOR2   | VAV3  | 1417302_at   | 1417123_at | 0.8893 |
| PSRC1   | VAV3  | 1417323_at   | 1417123_at | 0.9154 |
| HOXA1   | VAV3  | 1420565_at   | 1417123_at | 0.8423 |
| ETV5    | VAV3  | 1420998_at   | 1417123_at | 0.9705 |
| ATN1    | VAV3  | 1421149_a_at | 1417123_at | 0.8254 |
| ZIK1    | VAV3  | 1421395_at   | 1417123_at | 0.9886 |
| NPAS3   | VAV3  | 1421567_at   | 1417123_at | 0.9633 |
| SF1     | VAV3  | 1422321_a_at | 1417123_at | 0.9449 |
| ILF3    | VAV3  | 1422546_at   | 1417123_at | 0.8476 |
| HMGA2   | VAV3  | 1422851_at   | 1417123_at | 0.9371 |
| SUV39H2 | VAV3  | 1422979_at   | 1417123_at | 0.9675 |
| RAD51C  | VAV3  | 1423026_at   | 1417123_at | 0.9943 |
| RAD18   | VAV3  | 1423318_at   | 1417123_at | 0.9050 |

|         |        |              |            |        |
|---------|--------|--------------|------------|--------|
| SMARCC1 | VAV3   | 1423417_at   | 1417123_at | 0.9393 |
| HIP1    | VAV3   | 1424756_at   | 1417123_at | 0.9843 |
| PSRC1   | VAV3   | 1425416_s_at | 1417123_at | 0.9717 |
| CAND1   | VAV3   | 1428649_at   | 1417123_at | 0.9807 |
| ZNF157  | VAV3   | 1428887_at   | 1417123_at | 0.9275 |
| MCM8    | VAV3   | 1429557_at   | 1417123_at | 0.9156 |
| HELLS   | VAV3   | 1430139_at   | 1417123_at | 0.9159 |
| TLE4    | VAV3   | 1430384_at   | 1417123_at | 0.8142 |
| TGIF2   | VAV3   | 1431115_at   | 1417123_at | 0.9166 |
| ERCC4   | VAV3   | 1432272_a_at | 1417123_at | 0.9746 |
| SUV39H2 | VAV3   | 1433996_at   | 1417123_at | 0.9273 |
| PIF1    | VAV3   | 1436738_at   | 1417123_at | 0.9144 |
| SOX11   | VAV3   | 1436790_a_at | 1417123_at | 0.8865 |
| ASCL1   | VAV3   | 1437086_at   | 1417123_at | 0.8596 |
| RAD51C  | VAV3   | 1438453_at   | 1417123_at | 0.9215 |
| NKRF    | VAV3   | 1441325_at   | 1417123_at | 0.9828 |
| TAF1D   | VAV3   | 1442289_at   | 1417123_at | 0.8967 |
| FOXM1   | VAV3   | 1448834_at   | 1417123_at | 0.9398 |
| SOX4    | VAV3   | 1449370_at   | 1417123_at | 0.8426 |
| SUPT16H | VAV3   | 1449578_at   | 1417123_at | 0.9491 |
| TCERG1  | VAV3   | 1450100_a_at | 1417123_at | 0.9821 |
| ASCL1   | VAV3   | 1450164_at   | 1417123_at | 0.9596 |
| ZFP354C | VAV3   | 1450321_at   | 1417123_at | 0.9066 |
| MED1    | VAV3   | 1450402_at   | 1417123_at | 0.8075 |
| MYBL1   | VAV3   | 1450481_at   | 1417123_at | 0.9468 |
| SOX3    | VAV3   | 1450485_at   | 1417123_at | 0.9715 |
| SALL1   | VAV3   | 1450489_at   | 1417123_at | 0.8483 |
| HMGA2   | VAV3   | 1450780_s_at | 1417123_at | 0.9293 |
| HMGA2   | VAV3   | 1450781_at   | 1417123_at | 0.8495 |
| ZNF451  | VAV3   | 1451816_at   | 1417123_at | 0.9335 |
| NCOR2   | VAV3   | 1451841_a_at | 1417123_at | 0.9551 |
| ZFP2    | VAV3   | 1452025_a_at | 1417123_at | 0.9426 |
| ZBED3   | VAV3   | 1452088_at   | 1417123_at | 0.8946 |
| CENPF   | VAV3   | 1452334_at   | 1417123_at | 0.9074 |
| MLF1IP  | VAV3   | 1452816_at   | 1417123_at | 0.9065 |
| TTF2    | VAV3   | 1452818_at   | 1417123_at | 0.9529 |
| HELLS   | VAV3   | 1453361_at   | 1417123_at | 0.8622 |
| PHF6    | VAV3   | 1453761_at   | 1417123_at | 0.9947 |
| TAF2    | VAV3   | 1457351_at   | 1417123_at | 0.9820 |
| ZNF69   | VAV3   | 1458274_at   | 1417123_at | 0.8833 |
| RCOR2   | PSRC1  | 1417302_at   | 1417323_at | 0.8742 |
| RCOR2   | SART3  | 1417302_at   | 1417548_at | 0.8139 |
| RCOR2   | EXO1   | 1417302_at   | 1418027_at | 0.8693 |
| RCOR2   | CENPM  | 1417302_at   | 1418184_at | 0.8362 |
| RCOR2   | HRH1   | 1417302_at   | 1419210_at | 0.8043 |
| RCOR2   | TSGA14 | 1417302_at   | 1419686_at | 0.8167 |
| RCOR2   | PEG12  | 1417302_at   | 1420406_at | 0.8203 |
| RCOR2   | GALC   | 1417302_at   | 1420547_at | 0.9381 |
| RCOR2   | WNT7B  | 1417302_at   | 1420891_at | 0.8776 |
| RCOR2   | ETV5   | 1417302_at   | 1420998_at | 0.8653 |
| RCOR2   | ADAM12 | 1417302_at   | 1421171_at | 0.9188 |

|       |               |            |              |        |
|-------|---------------|------------|--------------|--------|
| RCOR2 | ADAM12        | 1417302_at | 1421172_at   | 0.8068 |
| RCOR2 | MTAP2         | 1417302_at | 1421327_at   | 0.9183 |
| RCOR2 | MTAP2         | 1417302_at | 1421328_at   | 0.8627 |
| RCOR2 | ZIK1          | 1417302_at | 1421395_at   | 0.8617 |
| RCOR2 | LRP8          | 1417302_at | 1421459_a_at | 0.8437 |
| RCOR2 | NPAS3         | 1417302_at | 1421567_at   | 0.9332 |
| RCOR2 | CRKL          | 1417302_at | 1421953_at   | 0.8508 |
| RCOR2 | NPTX1         | 1417302_at | 1422130_at   | 0.8053 |
| RCOR2 | CDC25C        | 1417302_at | 1422252_a_at | 0.8042 |
| RCOR2 | SF1           | 1417302_at | 1422321_a_at | 0.9284 |
| RCOR2 | RAB23         | 1417302_at | 1422399_a_at | 0.9160 |
| RCOR2 | ILF3          | 1417302_at | 1422546_at   | 0.8136 |
| RCOR2 | SUV39H2       | 1417302_at | 1422979_at   | 0.8508 |
| RCOR2 | RAD51C        | 1417302_at | 1423026_at   | 0.8918 |
| RCOR2 | INCENP        | 1417302_at | 1423093_at   | 0.8164 |
| RCOR2 | SMARCC1       | 1417302_at | 1423417_at   | 0.8494 |
| RCOR2 | D2ERTD750E    | 1417302_at | 1423464_at   | 0.8838 |
| RCOR2 | SEPT2         | 1417302_at | 1423473_at   | 0.8218 |
| RCOR2 | MASTL         | 1417302_at | 1423524_at   | 0.8560 |
| RCOR2 | MASTL         | 1417302_at | 1423525_at   | 0.8691 |
| RCOR2 | KCNC1         | 1417302_at | 1423559_at   | 0.8468 |
| RCOR2 | TMEM48        | 1417302_at | 1424173_at   | 0.8988 |
| RCOR2 | HIP1          | 1417302_at | 1424756_at   | 0.9176 |
| RCOR2 | WDR62         | 1417302_at | 1424849_at   | 0.8602 |
| RCOR2 | ATP6V0A1      | 1417302_at | 1425227_a_at | 0.8357 |
| RCOR2 | HUS1          | 1417302_at | 1425366_a_at | 0.8150 |
| RCOR2 | PSRC1         | 1417302_at | 1425416_s_at | 0.9292 |
| RCOR2 | MARK1         | 1417302_at | 1425509_at   | 0.8003 |
| RCOR2 | CD109         | 1417302_at | 1425658_at   | 0.8801 |
| RCOR2 | CCDC77        | 1417302_at | 1425734_a_at | 0.8247 |
| RCOR2 | FANCI         | 1417302_at | 1425941_a_at | 0.8617 |
| RCOR2 | CDC7          | 1417302_at | 1426021_a_at | 0.8738 |
| RCOR2 | PVT1          | 1417302_at | 1427140_at   | 0.8407 |
| RCOR2 | RG9MTD2       | 1417302_at | 1427375_at   | 0.8328 |
| RCOR2 | FANCI         | 1417302_at | 1427953_at   | 0.8079 |
| RCOR2 | SRGAP2        | 1417302_at | 1427967_at   | 0.9548 |
| RCOR2 | CAND1         | 1417302_at | 1428649_at   | 0.8676 |
| RCOR2 | ZNF157        | 1417302_at | 1428887_at   | 0.9570 |
| RCOR2 | RASL11A       | 1417302_at | 1429444_at   | 0.8679 |
| RCOR2 | SMC2          | 1417302_at | 1429659_at   | 0.8275 |
| RCOR2 | 6230416J20RIK | 1417302_at | 1429665_at   | 0.8867 |
| RCOR2 | 4632434I11RIK | 1417302_at | 1429734_at   | 0.9088 |
| RCOR2 | CEP70         | 1417302_at | 1430231_a_at | 0.8658 |
| RCOR2 | NUP205        | 1417302_at | 1430343_at   | 0.8399 |
| RCOR2 | TLE4          | 1417302_at | 1430384_at   | 0.8417 |
| RCOR2 | TGIF2         | 1417302_at | 1431115_at   | 0.8172 |
| RCOR2 | PGAP1         | 1417302_at | 1431169_at   | 0.8235 |
| RCOR2 | DLG5          | 1417302_at | 1431187_s_at | 0.8519 |
| RCOR2 | PVT1          | 1417302_at | 1431352_s_at | 0.8514 |
| RCOR2 | JAM2          | 1417302_at | 1431416_a_at | 0.8100 |
| RCOR2 | 2610021K21RIK | 1417302_at | 1431667_s_at | 0.8066 |

|       |               |            |              |        |
|-------|---------------|------------|--------------|--------|
| RCOR2 | RAB31         | 1417302_at | 1431691_a_at | 0.8986 |
| RCOR2 | PIGN          | 1417302_at | 1432115_a_at | 0.8290 |
| RCOR2 | ERCC4         | 1417302_at | 1432272_a_at | 0.9480 |
| RCOR2 | ARMC9         | 1417302_at | 1432383_a_at | 0.9474 |
| RCOR2 | NPHP4         | 1417302_at | 1434024_at   | 0.8942 |
| RCOR2 | SRGAP2        | 1417302_at | 1434407_at   | 0.8553 |
| RCOR2 | CD109         | 1417302_at | 1436346_at   | 0.8582 |
| RCOR2 | SDC3          | 1417302_at | 1436482_a_at | 0.8760 |
| RCOR2 | SOX11         | 1417302_at | 1436790_a_at | 0.8365 |
| RCOR2 | LRRC4B        | 1417302_at | 1437183_at   | 0.8174 |
| RCOR2 | AV164956      | 1417302_at | 1437673_at   | 0.8172 |
| RCOR2 | HEATR5B       | 1417302_at | 1438085_at   | 0.9018 |
| RCOR2 | 4933432K03RIK | 1417302_at | 1438356_x_at | 0.8457 |
| RCOR2 | DHX33         | 1417302_at | 1438765_at   | 0.8401 |
| RCOR2 | AI506816      | 1417302_at | 1439483_at   | 0.9362 |
| RCOR2 | INTS10        | 1417302_at | 1439712_at   | 0.8040 |
| RCOR2 | AI746468      | 1417302_at | 1439960_at   | 0.8677 |
| RCOR2 | A930024E05RIK | 1417302_at | 1440206_at   | 0.8868 |
| RCOR2 | KBTBD8        | 1417302_at | 1441275_at   | 0.8129 |
| RCOR2 | NKRF          | 1417302_at | 1441325_at   | 0.8916 |
| RCOR2 | AU043080      | 1417302_at | 1441375_at   | 0.8172 |
| RCOR2 | ASPM          | 1417302_at | 1441520_at   | 0.8951 |
| RCOR2 | TTK           | 1417302_at | 1442594_at   | 0.8757 |
| RCOR2 | BB337104      | 1417302_at | 1443026_at   | 0.8137 |
| RCOR2 | BB444561      | 1417302_at | 1443171_at   | 0.8190 |
| RCOR2 | BB340127      | 1417302_at | 1443230_at   | 0.8281 |
| RCOR2 | BB130444      | 1417302_at | 1443410_at   | 0.8551 |
| RCOR2 | ZBTB39        | 1417302_at | 1443880_at   | 0.8753 |
| RCOR2 | CDK5RAP2      | 1417302_at | 1443976_at   | 0.8995 |
| RCOR2 | ERCC6L        | 1417302_at | 1444024_at   | 0.8946 |
| RCOR2 | AV228095      | 1417302_at | 1444443_at   | 0.8048 |
| RCOR2 | 6530418L21RIK | 1417302_at | 1444723_at   | 0.9284 |
| RCOR2 | BC023969      | 1417302_at | 1445226_at   | 0.9330 |
| RCOR2 | KCND3         | 1417302_at | 1447513_at   | 0.9090 |
| RCOR2 | SEMA6D        | 1417302_at | 1448060_at   | 0.8670 |
| RCOR2 | OGG1          | 1417302_at | 1448815_at   | 0.8379 |
| RCOR2 | FOXM1         | 1417302_at | 1448834_at   | 0.8870 |
| RCOR2 | SKP2          | 1417302_at | 1449293_a_at | 0.8784 |
| RCOR2 | SOX4          | 1417302_at | 1449370_at   | 0.8457 |
| RCOR2 | SUPT16H       | 1417302_at | 1449578_at   | 0.8321 |
| RCOR2 | CCNB1         | 1417302_at | 1449675_at   | 0.8466 |
| RCOR2 | LFNG          | 1417302_at | 1449943_at   | 0.9562 |
| RCOR2 | APC           | 1417302_at | 1450056_at   | 0.8140 |
| RCOR2 | 4933411K20RIK | 1417302_at | 1450076_at   | 0.8401 |
| RCOR2 | TCERG1        | 1417302_at | 1450100_a_at | 0.8712 |
| RCOR2 | ASCL1         | 1417302_at | 1450164_at   | 0.9035 |
| RCOR2 | PCDHB11       | 1417302_at | 1450270_at   | 0.8581 |
| RCOR2 | ZFP354C       | 1417302_at | 1450321_at   | 0.9703 |
| RCOR2 | SHC3          | 1417302_at | 1450326_at   | 0.8122 |
| RCOR2 | SOX3          | 1417302_at | 1450485_at   | 0.9180 |
| RCOR2 | NCOR2         | 1417302_at | 1451841_a_at | 0.9580 |

|       |                       |            |                       |        |
|-------|-----------------------|------------|-----------------------|--------|
| RCOR2 | LMNB2                 | 1417302_at | 1451849_a_at          | 0.8162 |
| RCOR2 | ZFP2                  | 1417302_at | 1452025_a_at          | 0.9143 |
| RCOR2 | 6720460F02RIK         | 1417302_at | 1452073_at            | 0.8587 |
| RCOR2 | NOVA1                 | 1417302_at | 1452245_at            | 0.8033 |
| RCOR2 | CENPF                 | 1417302_at | 1452334_at            | 0.8761 |
| RCOR2 | ADAMTS7               | 1417302_at | 1452339_at            | 0.8603 |
| RCOR2 | ASPM                  | 1417302_at | 1452459_at            | 0.8644 |
| RCOR2 | TTF2                  | 1417302_at | 1452818_at            | 0.8178 |
| RCOR2 | RHOBTB3               | 1417302_at | 1453227_at            | 0.9237 |
| RCOR2 | CALR3                 | 1417302_at | 1453232_at            | 0.8141 |
| RCOR2 | TROAP                 | 1417302_at | 1453370_at            | 0.8663 |
| RCOR2 | CEP55                 | 1417302_at | 1453683_a_at          | 0.8341 |
| RCOR2 | DHX38                 | 1417302_at | 1453751_at            | 0.9076 |
| RCOR2 | PHF6                  | 1417302_at | 1453761_at            | 0.8448 |
| RCOR2 | FAM110A               | 1417302_at | 1453768_a_at          | 0.8420 |
| RCOR2 | NETO2                 | 1417302_at | 1454032_at            | 0.8050 |
| RCOR2 | EXOD1                 | 1417302_at | 1454229_a_at          | 0.8871 |
| RCOR2 | XKR5                  | 1417302_at | 1455127_at            | 0.8417 |
| RCOR2 | BM114403              | 1417302_at | 1455624_at            | 0.8011 |
| RCOR2 | ATP5G2                | 1417302_at | 1456128_at            | 0.8700 |
| RCOR2 | BB053540              | 1417302_at | 1456840_at            | 0.8221 |
| RCOR2 | TAF2                  | 1417302_at | 1457351_at            | 0.8690 |
| RCOR2 | BM224051              | 1417302_at | 1458630_at            | 0.8754 |
| RCOR2 | RNF219                | 1417302_at | 1458636_at            | 0.8684 |
| RCOR2 | 6530418L21RIK         | 1417302_at | 1459051_at            | 0.9006 |
| RCOR2 | AFFX-DapX-5_at        | 1417302_at | AFFX-DapX-5_at        | 0.8614 |
| RCOR2 | AFFX-r2-Bs-dap-5_at   | 1417302_at | AFFX-r2-Bs-dap-5_at   | 0.8604 |
| RCOR2 | AFFX-r2-Bs-lys-5_at   | 1417302_at | AFFX-r2-Bs-lys-5_at   | 0.8212 |
| RCOR2 | AFFX-r2-Bs-thr-5_s_at | 1417302_at | AFFX-r2-Bs-thr-5_s_at | 0.8622 |
| RCOR2 | AFFX-ThrX-5_at        | 1417302_at | AFFX-ThrX-5_at        | 0.8603 |
| PSRC1 | SART3                 | 1417323_at | 1417548_at            | 0.8354 |
| PSRC1 | EXO1                  | 1417323_at | 1418027_at            | 0.9060 |
| PSRC1 | CENPM                 | 1417323_at | 1418184_at            | 0.9317 |
| PSRC1 | TSGA14                | 1417323_at | 1419686_at            | 0.9109 |
| PSRC1 | PEG12                 | 1417323_at | 1420406_at            | 0.8792 |
| PSRC1 | GALC                  | 1417323_at | 1420547_at            | 0.9431 |
| PSRC1 | WNT7B                 | 1417323_at | 1420891_at            | 0.8520 |
| PSRC1 | ETV5                  | 1417323_at | 1420998_at            | 0.9141 |
| PSRC1 | ATN1                  | 1417323_at | 1421149_a_at          | 0.8401 |
| PSRC1 | ADAM12                | 1417323_at | 1421171_at            | 0.9536 |
| PSRC1 | ADAM12                | 1417323_at | 1421172_at            | 0.8224 |
| PSRC1 | MTAP2                 | 1417323_at | 1421327_at            | 0.9443 |
| PSRC1 | MTAP2                 | 1417323_at | 1421328_at            | 0.8861 |
| PSRC1 | ZIK1                  | 1417323_at | 1421395_at            | 0.9094 |
| PSRC1 | LRP8                  | 1417323_at | 1421459_a_at          | 0.8419 |
| PSRC1 | NPAS3                 | 1417323_at | 1421567_at            | 0.9071 |
| PSRC1 | CRKL                  | 1417323_at | 1421953_at            | 0.8364 |
| PSRC1 | NPTX1                 | 1417323_at | 1422130_at            | 0.8319 |
| PSRC1 | CDC25C                | 1417323_at | 1422252_a_at          | 0.9514 |
| PSRC1 | SF1                   | 1417323_at | 1422321_a_at          | 0.9159 |
| PSRC1 | RAB23                 | 1417323_at | 1422399_a_at          | 0.9234 |



|       |               |            |              |        |
|-------|---------------|------------|--------------|--------|
| PSRC1 | HMGA2         | 1417323_at | 1422851_at   | 0.8432 |
| PSRC1 | SUV39H2       | 1417323_at | 1422979_at   | 0.8947 |
| PSRC1 | RAD51C        | 1417323_at | 1423026_at   | 0.9265 |
| PSRC1 | INCENP        | 1417323_at | 1423093_at   | 0.8454 |
| PSRC1 | SMARCC1       | 1417323_at | 1423417_at   | 0.8459 |
| PSRC1 | D2ERTD750E    | 1417323_at | 1423464_at   | 0.9659 |
| PSRC1 | SEPT2         | 1417323_at | 1423473_at   | 0.8785 |
| PSRC1 | MASTL         | 1417323_at | 1423524_at   | 0.9200 |
| PSRC1 | MASTL         | 1417323_at | 1423525_at   | 0.9565 |
| PSRC1 | KCNC1         | 1417323_at | 1423559_at   | 0.8428 |
| PSRC1 | TMEM48        | 1417323_at | 1424173_at   | 0.9119 |
| PSRC1 | HIP1          | 1417323_at | 1424756_at   | 0.9186 |
| PSRC1 | WDR62         | 1417323_at | 1424849_at   | 0.8467 |
| PSRC1 | ATP6V0A1      | 1417323_at | 1425227_a_at | 0.8425 |
| PSRC1 | HUS1          | 1417323_at | 1425366_a_at | 0.8627 |
| PSRC1 | CD109         | 1417323_at | 1425658_at   | 0.9058 |
| PSRC1 | CCDC77        | 1417323_at | 1425734_a_at | 0.8599 |
| PSRC1 | FANCI         | 1417323_at | 1425941_a_at | 0.8865 |
| PSRC1 | CDC7          | 1417323_at | 1426021_a_at | 0.9057 |
| PSRC1 | PVT1          | 1417323_at | 1427140_at   | 0.8679 |
| PSRC1 | RG9MTD2       | 1417323_at | 1427375_at   | 0.8517 |
| PSRC1 | FANCI         | 1417323_at | 1427953_at   | 0.9055 |
| PSRC1 | SRGAP2        | 1417323_at | 1427967_at   | 0.9339 |
| PSRC1 | CAND1         | 1417323_at | 1428649_at   | 0.8901 |
| PSRC1 | ZNF157        | 1417323_at | 1428887_at   | 0.9297 |
| PSRC1 | RASL11A       | 1417323_at | 1429444_at   | 0.8872 |
| PSRC1 | SMC2          | 1417323_at | 1429659_at   | 0.8723 |
| PSRC1 | 6230416J20RIK | 1417323_at | 1429665_at   | 0.8942 |
| PSRC1 | 4632434I11RIK | 1417323_at | 1429734_at   | 0.9458 |
| PSRC1 | HELLS         | 1417323_at | 1430139_at   | 0.9158 |
| PSRC1 | CEP70         | 1417323_at | 1430231_a_at | 0.9026 |
| PSRC1 | NUP205        | 1417323_at | 1430343_at   | 0.8435 |
| PSRC1 | TLE4          | 1417323_at | 1430384_at   | 0.8125 |
| PSRC1 | TGIF2         | 1417323_at | 1431115_at   | 0.8676 |
| PSRC1 | PGAP1         | 1417323_at | 1431169_at   | 0.8335 |
| PSRC1 | DLG5          | 1417323_at | 1431187_s_at | 0.8537 |
| PSRC1 | PVT1          | 1417323_at | 1431352_s_at | 0.8859 |
| PSRC1 | 2610021K21RIK | 1417323_at | 1431667_s_at | 0.8303 |
| PSRC1 | RAB31         | 1417323_at | 1431691_a_at | 0.8702 |
| PSRC1 | PIGN          | 1417323_at | 1432115_a_at | 0.8772 |
| PSRC1 | ERCC4         | 1417323_at | 1432272_a_at | 0.9332 |
| PSRC1 | ARMC9         | 1417323_at | 1432383_a_at | 0.9272 |
| PSRC1 | 1700106N22RIK | 1417323_at | 1432504_at   | 0.8405 |
| PSRC1 | SUV39H2       | 1417323_at | 1433996_at   | 0.8561 |
| PSRC1 | NPHP4         | 1417323_at | 1434024_at   | 0.9384 |
| PSRC1 | SRGAP2        | 1417323_at | 1434407_at   | 0.8093 |
| PSRC1 | SOX3          | 1417323_at | 1435192_at   | 0.8655 |
| PSRC1 | EXOD1         | 1417323_at | 1435390_at   | 0.8504 |
| PSRC1 | CD109         | 1417323_at | 1436346_at   | 0.8964 |
| PSRC1 | CEP78         | 1417323_at | 1436352_at   | 0.8678 |
| PSRC1 | ZBTB12        | 1417323_at | 1436382_at   | 0.8117 |

|       |               |            |              |        |
|-------|---------------|------------|--------------|--------|
| PSRC1 | SDC3          | 1417323_at | 1436482_a_at | 0.9206 |
| PSRC1 | PIF1          | 1417323_at | 1436738_at   | 0.8304 |
| PSRC1 | SOX11         | 1417323_at | 1436790_a_at | 0.9307 |
| PSRC1 | ASCL1         | 1417323_at | 1437086_at   | 0.9318 |
| PSRC1 | LRRC4B        | 1417323_at | 1437183_at   | 0.8267 |
| PSRC1 | 2810408I11RIK | 1417323_at | 1437549_at   | 0.8521 |
| PSRC1 | AV164956      | 1417323_at | 1437673_at   | 0.9146 |
| PSRC1 | HEATR1        | 1417323_at | 1437965_at   | 0.8143 |
| PSRC1 | HEATR5B       | 1417323_at | 1438085_at   | 0.8787 |
| PSRC1 | 4933432K03RIK | 1417323_at | 1438356_x_at | 0.8806 |
| PSRC1 | RAD51C        | 1417323_at | 1438453_at   | 0.8747 |
| PSRC1 | DHX33         | 1417323_at | 1438765_at   | 0.8923 |
| PSRC1 | AH11          | 1417323_at | 1439083_at   | 0.8008 |
| PSRC1 | FANCD2        | 1417323_at | 1439091_at   | 0.8934 |
| PSRC1 | AI506816      | 1417323_at | 1439483_at   | 0.9410 |
| PSRC1 | AI746468      | 1417323_at | 1439960_at   | 0.8718 |
| PSRC1 | ABCC12        | 1417323_at | 1439985_at   | 0.8493 |
| PSRC1 | A930024E05RIK | 1417323_at | 1440206_at   | 0.9288 |
| PSRC1 | SPRY4         | 1417323_at | 1440867_at   | 0.8194 |
| PSRC1 | KIF20B        | 1417323_at | 1440924_at   | 0.8149 |
| PSRC1 | KBTBD8        | 1417323_at | 1441275_at   | 0.8724 |
| PSRC1 | NKRF          | 1417323_at | 1441325_at   | 0.8957 |
| PSRC1 | AU043080      | 1417323_at | 1441375_at   | 0.8700 |
| PSRC1 | ASPM          | 1417323_at | 1441520_at   | 0.8843 |
| PSRC1 | D2ERTD750E    | 1417323_at | 1442280_at   | 0.9535 |
| PSRC1 | TTK           | 1417323_at | 1442594_at   | 0.9203 |
| PSRC1 | BB337104      | 1417323_at | 1443026_at   | 0.8890 |
| PSRC1 | BB444561      | 1417323_at | 1443171_at   | 0.9128 |
| PSRC1 | BB340127      | 1417323_at | 1443230_at   | 0.8447 |
| PSRC1 | BB130444      | 1417323_at | 1443410_at   | 0.9268 |
| PSRC1 | ZBTB39        | 1417323_at | 1443880_at   | 0.8605 |
| PSRC1 | CDK5RAP2      | 1417323_at | 1443976_at   | 0.8538 |
| PSRC1 | ERCC6L        | 1417323_at | 1444024_at   | 0.9152 |
| PSRC1 | AV228095      | 1417323_at | 1444443_at   | 0.8905 |
| PSRC1 | 6530418L21RIK | 1417323_at | 1444723_at   | 0.9580 |
| PSRC1 | MASTL         | 1417323_at | 1444725_at   | 0.8615 |
| PSRC1 | BC023969      | 1417323_at | 1445226_at   | 0.9352 |
| PSRC1 | AV323315      | 1417323_at | 1445298_at   | 0.9414 |
| PSRC1 | KCND3         | 1417323_at | 1447513_at   | 0.9280 |
| PSRC1 | SEMA6D        | 1417323_at | 1448060_at   | 0.8299 |
| PSRC1 | OGG1          | 1417323_at | 1448815_at   | 0.8457 |
| PSRC1 | FOXM1         | 1417323_at | 1448834_at   | 0.9495 |
| PSRC1 | SKP2          | 1417323_at | 1449293_a_at | 0.9093 |
| PSRC1 | SOX4          | 1417323_at | 1449370_at   | 0.8744 |
| PSRC1 | SUPT16H       | 1417323_at | 1449578_at   | 0.8629 |
| PSRC1 | CCNB1         | 1417323_at | 1449675_at   | 0.8943 |
| PSRC1 | LFNG          | 1417323_at | 1449943_at   | 0.8966 |
| PSRC1 | 4933411K20RIK | 1417323_at | 1450076_at   | 0.8979 |
| PSRC1 | TCERG1        | 1417323_at | 1450100_a_at | 0.8873 |
| PSRC1 | ASCL1         | 1417323_at | 1450164_at   | 0.9594 |
| PSRC1 | PCDHB11       | 1417323_at | 1450270_at   | 0.8040 |

|       |                       |            |                       |        |
|-------|-----------------------|------------|-----------------------|--------|
| PSRC1 | NPAS3                 | 1417323_at | 1450287_at            | 0.8022 |
| PSRC1 | ZFP354C               | 1417323_at | 1450321_at            | 0.9043 |
| PSRC1 | SHC3                  | 1417323_at | 1450326_at            | 0.8587 |
| PSRC1 | MYBL1                 | 1417323_at | 1450481_at            | 0.8049 |
| PSRC1 | SOX3                  | 1417323_at | 1450485_at            | 0.8895 |
| PSRC1 | HMGA2                 | 1417323_at | 1450780_s_at          | 0.8366 |
| PSRC1 | NCOR2                 | 1417323_at | 1451841_a_at          | 0.9289 |
| PSRC1 | ZFP2                  | 1417323_at | 1452025_a_at          | 0.8875 |
| PSRC1 | 6720460F02RIK         | 1417323_at | 1452073_at            | 0.9738 |
| PSRC1 | RRP1B                 | 1417323_at | 1452119_at            | 0.8782 |
| PSRC1 | NOVA1                 | 1417323_at | 1452245_at            | 0.9022 |
| PSRC1 | PVT1                  | 1417323_at | 1452324_at            | 0.8081 |
| PSRC1 | CENPF                 | 1417323_at | 1452334_at            | 0.9055 |
| PSRC1 | 4930427A07RIK         | 1417323_at | 1452337_at            | 0.8395 |
| PSRC1 | ADAMTS7               | 1417323_at | 1452339_at            | 0.9199 |
| PSRC1 | ASPM                  | 1417323_at | 1452459_at            | 0.9460 |
| PSRC1 | TTF2                  | 1417323_at | 1452818_at            | 0.8667 |
| PSRC1 | RHOBTB3               | 1417323_at | 1453227_at            | 0.9344 |
| PSRC1 | CALR3                 | 1417323_at | 1453232_at            | 0.8358 |
| PSRC1 | TROAP                 | 1417323_at | 1453370_at            | 0.8801 |
| PSRC1 | CEP55                 | 1417323_at | 1453683_a_at          | 0.8863 |
| PSRC1 | DHX38                 | 1417323_at | 1453751_at            | 0.9035 |
| PSRC1 | PHF6                  | 1417323_at | 1453761_at            | 0.8968 |
| PSRC1 | FAM110A               | 1417323_at | 1453768_a_at          | 0.8842 |
| PSRC1 | NETO2                 | 1417323_at | 1454032_at            | 0.9277 |
| PSRC1 | CCDC77                | 1417323_at | 1454228_a_at          | 0.8284 |
| PSRC1 | EXOD1                 | 1417323_at | 1454229_a_at          | 0.9269 |
| PSRC1 | XKR5                  | 1417323_at | 1455127_at            | 0.8573 |
| PSRC1 | UTP23                 | 1417323_at | 1455259_a_at          | 0.8638 |
| PSRC1 | ATP5G2                | 1417323_at | 1456128_at            | 0.8424 |
| PSRC1 | 2700049P18RIK         | 1417323_at | 1456163_at            | 0.8387 |
| PSRC1 | BB053540              | 1417323_at | 1456840_at            | 0.8381 |
| PSRC1 | BM235636              | 1417323_at | 1456853_at            | 0.8080 |
| PSRC1 | AV254764              | 1417323_at | 1456951_at            | 0.8356 |
| PSRC1 | NETO2                 | 1417323_at | 1457344_at            | 0.8248 |
| PSRC1 | TAF2                  | 1417323_at | 1457351_at            | 0.8895 |
| PSRC1 | ADAMTS6               | 1417323_at | 1457548_at            | 0.8073 |
| PSRC1 | ZNF69                 | 1417323_at | 1458274_at            | 0.8033 |
| PSRC1 | BM224051              | 1417323_at | 1458630_at            | 0.8093 |
| PSRC1 | RNF219                | 1417323_at | 1458636_at            | 0.8978 |
| PSRC1 | 6530418L21RIK         | 1417323_at | 1459051_at            | 0.9208 |
| PSRC1 | AFFX-DapX-5_at        | 1417323_at | AFFX-DapX-5_at        | 0.8754 |
| PSRC1 | AFFX-LysX-5_at        | 1417323_at | AFFX-LysX-5_at        | 0.8038 |
| PSRC1 | AFFX-r2-Bs-dap-5_at   | 1417323_at | AFFX-r2-Bs-dap-5_at   | 0.8605 |
| PSRC1 | AFFX-r2-Bs-lys-5_at   | 1417323_at | AFFX-r2-Bs-lys-5_at   | 0.8506 |
| PSRC1 | AFFX-r2-Bs-thr-5_s_at | 1417323_at | AFFX-r2-Bs-thr-5_s_at | 0.8571 |
| PSRC1 | AFFX-ThrX-5_at        | 1417323_at | AFFX-ThrX-5_at        | 0.8769 |
| ETV5  | SART3                 | 1420998_at | 1417548_at            | 0.8565 |
| ZIK1  | SART3                 | 1421395_at | 1417548_at            | 0.9327 |
| NPAS3 | SART3                 | 1421567_at | 1417548_at            | 0.8335 |
| CBX5  | SART3                 | 1421933_at | 1417548_at            | 0.8243 |

|         |       |              |            |        |
|---------|-------|--------------|------------|--------|
| SF1     | SART3 | 1422321_a_at | 1417548_at | 0.8361 |
| ILF3    | SART3 | 1422546_at   | 1417548_at | 0.8691 |
| HMGA2   | SART3 | 1422851_at   | 1417548_at | 0.8663 |
| SUV39H2 | SART3 | 1422979_at   | 1417548_at | 0.9393 |
| RAD51C  | SART3 | 1423026_at   | 1417548_at | 0.9177 |
| RAD18   | SART3 | 1423318_at   | 1417548_at | 0.8384 |
| SMARCC1 | SART3 | 1423417_at   | 1417548_at | 0.9558 |
| HIP1    | SART3 | 1424756_at   | 1417548_at | 0.9177 |
| PSRC1   | SART3 | 1425416_s_at | 1417548_at | 0.8698 |
| CAND1   | SART3 | 1428649_at   | 1417548_at | 0.8805 |
| ZNF157  | SART3 | 1428887_at   | 1417548_at | 0.8361 |
| MCM8    | SART3 | 1429557_at   | 1417548_at | 0.8239 |
| HELLS   | SART3 | 1430139_at   | 1417548_at | 0.8862 |
| TGIF2   | SART3 | 1431115_at   | 1417548_at | 0.8431 |
| ERCC4   | SART3 | 1432272_a_at | 1417548_at | 0.9107 |
| SUV39H2 | SART3 | 1433996_at   | 1417548_at | 0.9386 |
| PIF1    | SART3 | 1436738_at   | 1417548_at | 0.8444 |
| SOX11   | SART3 | 1436790_a_at | 1417548_at | 0.8932 |
| RAD51C  | SART3 | 1438453_at   | 1417548_at | 0.9171 |
| NKRF    | SART3 | 1441325_at   | 1417548_at | 0.9353 |
| TAF1D   | SART3 | 1442289_at   | 1417548_at | 0.8408 |
| FOXM1   | SART3 | 1448834_at   | 1417548_at | 0.8665 |
| SOX4    | SART3 | 1449370_at   | 1417548_at | 0.8473 |
| SUPT16H | SART3 | 1449578_at   | 1417548_at | 0.9525 |
| TCERG1  | SART3 | 1450100_a_at | 1417548_at | 0.9592 |
| ASCL1   | SART3 | 1450164_at   | 1417548_at | 0.8841 |
| ZFP354C | SART3 | 1450321_at   | 1417548_at | 0.8736 |
| MED1    | SART3 | 1450402_at   | 1417548_at | 0.8398 |
| MYBL1   | SART3 | 1450481_at   | 1417548_at | 0.9089 |
| SOX3    | SART3 | 1450485_at   | 1417548_at | 0.9066 |
| HMGA2   | SART3 | 1450780_s_at | 1417548_at | 0.8837 |
| ZNF451  | SART3 | 1451816_at   | 1417548_at | 0.8736 |
| NCOR2   | SART3 | 1451841_a_at | 1417548_at | 0.8474 |
| ZFP2    | SART3 | 1452025_a_at | 1417548_at | 0.8656 |
| ZBED3   | SART3 | 1452088_at   | 1417548_at | 0.8576 |
| CENPF   | SART3 | 1452334_at   | 1417548_at | 0.8671 |
| MLF1IP  | SART3 | 1452816_at   | 1417548_at | 0.8530 |
| TTF2    | SART3 | 1452818_at   | 1417548_at | 0.8941 |
| HELLS   | SART3 | 1453361_at   | 1417548_at | 0.8092 |
| PHF6    | SART3 | 1453761_at   | 1417548_at | 0.9095 |
| TAF2    | SART3 | 1457351_at   | 1417548_at | 0.9391 |
| ZNF69   | SART3 | 1458274_at   | 1417548_at | 0.9019 |
| HOXA1   | INTS5 | 1420565_at   | 1417887_at | 0.9402 |
| ETV5    | INTS5 | 1420998_at   | 1417887_at | 0.9278 |
| ZIK1    | INTS5 | 1421395_at   | 1417887_at | 0.9204 |
| RAD51L1 | INTS5 | 1421430_at   | 1417887_at | 0.8580 |
| NPAS3   | INTS5 | 1421567_at   | 1417887_at | 0.9078 |
| SF1     | INTS5 | 1422321_a_at | 1417887_at | 0.8930 |
| HMGA2   | INTS5 | 1422851_at   | 1417887_at | 0.9547 |
| SUV39H2 | INTS5 | 1422979_at   | 1417887_at | 0.9045 |
| RAD51C  | INTS5 | 1423026_at   | 1417887_at | 0.9145 |

|         |       |              |            |        |
|---------|-------|--------------|------------|--------|
| RAD18   | INTS5 | 1423318_at   | 1417887_at | 0.9579 |
| SMARCC1 | INTS5 | 1423417_at   | 1417887_at | 0.8862 |
| HIP1    | INTS5 | 1424756_at   | 1417887_at | 0.9174 |
| PSRC1   | INTS5 | 1425416_s_at | 1417887_at | 0.8551 |
| PEG10   | INTS5 | 1427550_at   | 1417887_at | 0.8710 |
| CAND1   | INTS5 | 1428649_at   | 1417887_at | 0.9452 |
| MCM8    | INTS5 | 1429557_at   | 1417887_at | 0.9043 |
| HELLS   | INTS5 | 1430139_at   | 1417887_at | 0.8661 |
| TGIF2   | INTS5 | 1431115_at   | 1417887_at | 0.8973 |
| ERCC4   | INTS5 | 1432272_a_at | 1417887_at | 0.8719 |
| SUV39H2 | INTS5 | 1433996_at   | 1417887_at | 0.8884 |
| PIF1    | INTS5 | 1436738_at   | 1417887_at | 0.9439 |
| RAD51C  | INTS5 | 1438453_at   | 1417887_at | 0.8768 |
| NKRF    | INTS5 | 1441325_at   | 1417887_at | 0.9237 |
| TAF1D   | INTS5 | 1442289_at   | 1417887_at | 0.9520 |
| FOXM1   | INTS5 | 1448834_at   | 1417887_at | 0.8678 |
| SUPT16H | INTS5 | 1449578_at   | 1417887_at | 0.9079 |
| TCERG1  | INTS5 | 1450100_a_at | 1417887_at | 0.9187 |
| ASCL1   | INTS5 | 1450164_at   | 1417887_at | 0.8677 |
| MED1    | INTS5 | 1450402_at   | 1417887_at | 0.8708 |
| MYBL1   | INTS5 | 1450481_at   | 1417887_at | 0.9510 |
| SOX3    | INTS5 | 1450485_at   | 1417887_at | 0.9220 |
| SALL1   | INTS5 | 1450489_at   | 1417887_at | 0.8710 |
| HMGA2   | INTS5 | 1450780_s_at | 1417887_at | 0.9465 |
| HMGA2   | INTS5 | 1450781_at   | 1417887_at | 0.9396 |
| ZNF451  | INTS5 | 1451816_at   | 1417887_at | 0.9750 |
| NCOR2   | INTS5 | 1451841_a_at | 1417887_at | 0.8578 |
| ZFP2    | INTS5 | 1452025_a_at | 1417887_at | 0.8709 |
| ZBED3   | INTS5 | 1452088_at   | 1417887_at | 0.9440 |
| MLF1IP  | INTS5 | 1452816_at   | 1417887_at | 0.9260 |
| TTF2    | INTS5 | 1452818_at   | 1417887_at | 0.9316 |
| HELLS   | INTS5 | 1453361_at   | 1417887_at | 0.9360 |
| PHF6    | INTS5 | 1453761_at   | 1417887_at | 0.9449 |
| TAF2    | INTS5 | 1457351_at   | 1417887_at | 0.9178 |
| ZNF69   | INTS5 | 1458274_at   | 1417887_at | 0.8369 |
| HOXA1   | EXO1  | 1420565_at   | 1418027_at | 0.8415 |
| ETV5    | EXO1  | 1420998_at   | 1418027_at | 0.9562 |
| ZIK1    | EXO1  | 1421395_at   | 1418027_at | 0.9960 |
| NPAS3   | EXO1  | 1421567_at   | 1418027_at | 0.9331 |
| SF1     | EXO1  | 1422321_a_at | 1418027_at | 0.9217 |
| ILF3    | EXO1  | 1422546_at   | 1418027_at | 0.8453 |
| HMGA2   | EXO1  | 1422851_at   | 1418027_at | 0.9368 |
| SUV39H2 | EXO1  | 1422979_at   | 1418027_at | 0.9689 |
| RAD51C  | EXO1  | 1423026_at   | 1418027_at | 0.9955 |
| RAD18   | EXO1  | 1423318_at   | 1418027_at | 0.9154 |
| SMARCC1 | EXO1  | 1423417_at   | 1418027_at | 0.9457 |
| HIP1    | EXO1  | 1424756_at   | 1418027_at | 0.9827 |
| PSRC1   | EXO1  | 1425416_s_at | 1418027_at | 0.9590 |
| CAND1   | EXO1  | 1428649_at   | 1418027_at | 0.9655 |
| ZNF157  | EXO1  | 1428887_at   | 1418027_at | 0.9064 |
| MCM8    | EXO1  | 1429557_at   | 1418027_at | 0.9221 |

|         |       |              |            |        |
|---------|-------|--------------|------------|--------|
| HELLS   | EXO1  | 1430139_at   | 1418027_at | 0.9209 |
| TLE4    | EXO1  | 1430384_at   | 1418027_at | 0.8005 |
| TGIF2   | EXO1  | 1431115_at   | 1418027_at | 0.9136 |
| ERCC4   | EXO1  | 1432272_a_at | 1418027_at | 0.9691 |
| SUV39H2 | EXO1  | 1433996_at   | 1418027_at | 0.9430 |
| PIF1    | EXO1  | 1436738_at   | 1418027_at | 0.9159 |
| SOX11   | EXO1  | 1436790_a_at | 1418027_at | 0.8853 |
| ASCL1   | EXO1  | 1437086_at   | 1418027_at | 0.8542 |
| RAD51C  | EXO1  | 1438453_at   | 1418027_at | 0.9306 |
| NKRF    | EXO1  | 1441325_at   | 1418027_at | 0.9887 |
| TAF1D   | EXO1  | 1442289_at   | 1418027_at | 0.9093 |
| FOX1M1  | EXO1  | 1448834_at   | 1418027_at | 0.9384 |
| SOX4    | EXO1  | 1449370_at   | 1418027_at | 0.8348 |
| SUPT16H | EXO1  | 1449578_at   | 1418027_at | 0.9499 |
| TCERG1  | EXO1  | 1450100_a_at | 1418027_at | 0.9888 |
| ASCL1   | EXO1  | 1450164_at   | 1418027_at | 0.9531 |
| ZFP354C | EXO1  | 1450321_at   | 1418027_at | 0.9001 |
| MED1    | EXO1  | 1450402_at   | 1418027_at | 0.8429 |
| MYBL1   | EXO1  | 1450481_at   | 1418027_at | 0.9621 |
| SOX3    | EXO1  | 1450485_at   | 1418027_at | 0.9599 |
| SALL1   | EXO1  | 1450489_at   | 1418027_at | 0.8490 |
| HMGA2   | EXO1  | 1450780_s_at | 1418027_at | 0.9377 |
| HMGA2   | EXO1  | 1450781_at   | 1418027_at | 0.8477 |
| ZNF451  | EXO1  | 1451816_at   | 1418027_at | 0.9410 |
| NCOR2   | EXO1  | 1451841_a_at | 1418027_at | 0.9325 |
| ZFP2    | EXO1  | 1452025_a_at | 1418027_at | 0.9322 |
| ZBED3   | EXO1  | 1452088_at   | 1418027_at | 0.9004 |
| CENPF   | EXO1  | 1452334_at   | 1418027_at | 0.9183 |
| MLF1IP  | EXO1  | 1452816_at   | 1418027_at | 0.9269 |
| TTF2    | EXO1  | 1452818_at   | 1418027_at | 0.9604 |
| HELLS   | EXO1  | 1453361_at   | 1418027_at | 0.8697 |
| PHF6    | EXO1  | 1453761_at   | 1418027_at | 0.9940 |
| TAF2    | EXO1  | 1457351_at   | 1418027_at | 0.9909 |
| ZNF69   | EXO1  | 1458274_at   | 1418027_at | 0.9044 |
| HOXA1   | CENPM | 1420565_at   | 1418184_at | 0.8163 |
| ETV5    | CENPM | 1420998_at   | 1418184_at | 0.9638 |
| ATN1    | CENPM | 1421149_a_at | 1418184_at | 0.8123 |
| ZIK1    | CENPM | 1421395_at   | 1418184_at | 0.9632 |
| NPAS3   | CENPM | 1421567_at   | 1418184_at | 0.9006 |
| SF1     | CENPM | 1422321_a_at | 1418184_at | 0.9149 |
| ILF3    | CENPM | 1422546_at   | 1418184_at | 0.8140 |
| HMGA2   | CENPM | 1422851_at   | 1418184_at | 0.9274 |
| SUV39H2 | CENPM | 1422979_at   | 1418184_at | 0.9349 |
| RAD51C  | CENPM | 1423026_at   | 1418184_at | 0.9606 |
| RAD18   | CENPM | 1423318_at   | 1418184_at | 0.8943 |
| SMARCC1 | CENPM | 1423417_at   | 1418184_at | 0.9074 |
| HIP1    | CENPM | 1424756_at   | 1418184_at | 0.9619 |
| PSRC1   | CENPM | 1425416_s_at | 1418184_at | 0.9360 |
| CAND1   | CENPM | 1428649_at   | 1418184_at | 0.9241 |
| ZNF157  | CENPM | 1428887_at   | 1418184_at | 0.8752 |
| MCM8    | CENPM | 1429557_at   | 1418184_at | 0.8817 |

|         |        |              |            |        |
|---------|--------|--------------|------------|--------|
| HELLS   | CENPM  | 1430139_at   | 1418184_at | 0.9347 |
| TGIF2   | CENPM  | 1431115_at   | 1418184_at | 0.9356 |
| ERCC4   | CENPM  | 1432272_a_at | 1418184_at | 0.9344 |
| SUV39H2 | CENPM  | 1433996_at   | 1418184_at | 0.9213 |
| SOX3    | CENPM  | 1435192_at   | 1418184_at | 0.8601 |
| PIF1    | CENPM  | 1436738_at   | 1418184_at | 0.9295 |
| SOX11   | CENPM  | 1436790_a_at | 1418184_at | 0.8747 |
| ASCL1   | CENPM  | 1437086_at   | 1418184_at | 0.9085 |
| RAD51C  | CENPM  | 1438453_at   | 1418184_at | 0.9268 |
| NKRF    | CENPM  | 1441325_at   | 1418184_at | 0.9580 |
| TAF1D   | CENPM  | 1442289_at   | 1418184_at | 0.8777 |
| FOXMI   | CENPM  | 1448834_at   | 1418184_at | 0.9658 |
| SOX4    | CENPM  | 1449370_at   | 1418184_at | 0.8412 |
| SUPT16H | CENPM  | 1449578_at   | 1418184_at | 0.9174 |
| TCERG1  | CENPM  | 1450100_a_at | 1418184_at | 0.9520 |
| ASCL1   | CENPM  | 1450164_at   | 1418184_at | 0.9548 |
| NPAS3   | CENPM  | 1450287_at   | 1418184_at | 0.8256 |
| ZFP354C | CENPM  | 1450321_at   | 1418184_at | 0.8727 |
| MED1    | CENPM  | 1450402_at   | 1418184_at | 0.8264 |
| MYBL1   | CENPM  | 1450481_at   | 1418184_at | 0.9304 |
| SOX3    | CENPM  | 1450485_at   | 1418184_at | 0.9358 |
| SALL1   | CENPM  | 1450489_at   | 1418184_at | 0.8213 |
| HMGA2   | CENPM  | 1450780_s_at | 1418184_at | 0.9371 |
| HMGA2   | CENPM  | 1450781_at   | 1418184_at | 0.8278 |
| ZNF451  | CENPM  | 1451816_at   | 1418184_at | 0.9109 |
| NCOR2   | CENPM  | 1451841_a_at | 1418184_at | 0.9049 |
| ZFP2    | CENPM  | 1452025_a_at | 1418184_at | 0.8970 |
| ZBED3   | CENPM  | 1452088_at   | 1418184_at | 0.8795 |
| CENPF   | CENPM  | 1452334_at   | 1418184_at | 0.8902 |
| MLF1IP  | CENPM  | 1452816_at   | 1418184_at | 0.8978 |
| TTF2    | CENPM  | 1452818_at   | 1418184_at | 0.9663 |
| HELLS   | CENPM  | 1453361_at   | 1418184_at | 0.8398 |
| PHF6    | CENPM  | 1453761_at   | 1418184_at | 0.9586 |
| TAF2    | CENPM  | 1457351_at   | 1418184_at | 0.9578 |
| ZNF69   | CENPM  | 1458274_at   | 1418184_at | 0.8685 |
| SALL1   | EN2    | 1450489_at   | 1418868_at | 0.8130 |
| PSRC1   | HRH1   | 1425416_s_at | 1419210_at | 0.8190 |
| ZNF157  | HRH1   | 1428887_at   | 1419210_at | 0.8484 |
| TLE4    | HRH1   | 1430384_at   | 1419210_at | 0.9075 |
| ZFP354C | HRH1   | 1450321_at   | 1419210_at | 0.8282 |
| NCOR2   | HRH1   | 1451841_a_at | 1419210_at | 0.8208 |
| ETV5    | TSGA14 | 1420998_at   | 1419686_at | 0.9265 |
| ATN1    | TSGA14 | 1421149_a_at | 1419686_at | 0.8283 |
| ZIK1    | TSGA14 | 1421395_at   | 1419686_at | 0.9491 |
| NPAS3   | TSGA14 | 1421567_at   | 1419686_at | 0.8991 |
| SF1     | TSGA14 | 1422321_a_at | 1419686_at | 0.8808 |
| ILF3    | TSGA14 | 1422546_at   | 1419686_at | 0.8318 |
| HMGA2   | TSGA14 | 1422851_at   | 1419686_at | 0.9018 |
| SUV39H2 | TSGA14 | 1422979_at   | 1419686_at | 0.9581 |
| RAD51C  | TSGA14 | 1423026_at   | 1419686_at | 0.9524 |
| RAD18   | TSGA14 | 1423318_at   | 1419686_at | 0.8677 |

|         |        |              |            |        |
|---------|--------|--------------|------------|--------|
| SMARCC1 | TSGA14 | 1423417_at   | 1419686_at | 0.9117 |
| HIP1    | TSGA14 | 1424756_at   | 1419686_at | 0.9381 |
| PSRC1   | TSGA14 | 1425416_s_at | 1419686_at | 0.9355 |
| CAND1   | TSGA14 | 1428649_at   | 1419686_at | 0.9447 |
| ZNF157  | TSGA14 | 1428887_at   | 1419686_at | 0.8682 |
| MCM8    | TSGA14 | 1429557_at   | 1419686_at | 0.8547 |
| HELLS   | TSGA14 | 1430139_at   | 1419686_at | 0.9422 |
| TGIF2   | TSGA14 | 1431115_at   | 1419686_at | 0.8487 |
| ERCC4   | TSGA14 | 1432272_a_at | 1419686_at | 0.9254 |
| SUV39H2 | TSGA14 | 1433996_at   | 1419686_at | 0.9347 |
| PIF1    | TSGA14 | 1436738_at   | 1419686_at | 0.8994 |
| SOX11   | TSGA14 | 1436790_a_at | 1419686_at | 0.9205 |
| ASCL1   | TSGA14 | 1437086_at   | 1419686_at | 0.8739 |
| RAD51C  | TSGA14 | 1438453_at   | 1419686_at | 0.9486 |
| NKRF    | TSGA14 | 1441325_at   | 1419686_at | 0.9347 |
| TAF1D   | TSGA14 | 1442289_at   | 1419686_at | 0.8379 |
| FOXM1   | TSGA14 | 1448834_at   | 1419686_at | 0.9059 |
| SOX4    | TSGA14 | 1449370_at   | 1419686_at | 0.8720 |
| SUPT16H | TSGA14 | 1449578_at   | 1419686_at | 0.9410 |
| TCERG1  | TSGA14 | 1450100_a_at | 1419686_at | 0.9436 |
| ASCL1   | TSGA14 | 1450164_at   | 1419686_at | 0.9414 |
| NPAS3   | TSGA14 | 1450287_at   | 1419686_at | 0.8019 |
| ZFP354C | TSGA14 | 1450321_at   | 1419686_at | 0.8479 |
| MYBL1   | TSGA14 | 1450481_at   | 1419686_at | 0.9052 |
| SOX3    | TSGA14 | 1450485_at   | 1419686_at | 0.9069 |
| HMGA2   | TSGA14 | 1450780_s_at | 1419686_at | 0.9051 |
| ZNF451  | TSGA14 | 1451816_at   | 1419686_at | 0.8789 |
| NCOR2   | TSGA14 | 1451841_a_at | 1419686_at | 0.8971 |
| ZFP2    | TSGA14 | 1452025_a_at | 1419686_at | 0.8809 |
| ZBED3   | TSGA14 | 1452088_at   | 1419686_at | 0.8333 |
| CENPF   | TSGA14 | 1452334_at   | 1419686_at | 0.8911 |
| MLF1IP  | TSGA14 | 1452816_at   | 1419686_at | 0.8858 |
| TTF2    | TSGA14 | 1452818_at   | 1419686_at | 0.8907 |
| PHF6    | TSGA14 | 1453761_at   | 1419686_at | 0.9503 |
| TAF2    | TSGA14 | 1457351_at   | 1419686_at | 0.9345 |
| ZNF69   | TSGA14 | 1458274_at   | 1419686_at | 0.8315 |
| ETV5    | PEG12  | 1420998_at   | 1420406_at | 0.8618 |
| ZIK1    | PEG12  | 1421395_at   | 1420406_at | 0.8720 |
| NPAS3   | PEG12  | 1421567_at   | 1420406_at | 0.8529 |
| SF1     | PEG12  | 1422321_a_at | 1420406_at | 0.8359 |
| SUV39H2 | PEG12  | 1422979_at   | 1420406_at | 0.8502 |
| RAD51C  | PEG12  | 1423026_at   | 1420406_at | 0.8932 |
| SMARCC1 | PEG12  | 1423417_at   | 1420406_at | 0.8248 |
| HIP1    | PEG12  | 1424756_at   | 1420406_at | 0.8806 |
| PSRC1   | PEG12  | 1425416_s_at | 1420406_at | 0.8917 |
| CAND1   | PEG12  | 1428649_at   | 1420406_at | 0.8348 |
| ZNF157  | PEG12  | 1428887_at   | 1420406_at | 0.8576 |
| MCM8    | PEG12  | 1429557_at   | 1420406_at | 0.8647 |
| HELLS   | PEG12  | 1430139_at   | 1420406_at | 0.8508 |
| TGIF2   | PEG12  | 1431115_at   | 1420406_at | 0.8876 |
| ERCC4   | PEG12  | 1432272_a_at | 1420406_at | 0.8856 |



|         |        |              |            |        |
|---------|--------|--------------|------------|--------|
| SUV39H2 | PEG12  | 1433996_at   | 1420406_at | 0.8120 |
| ASCL1   | PEG12  | 1437086_at   | 1420406_at | 0.8238 |
| NKRF    | PEG12  | 1441325_at   | 1420406_at | 0.8689 |
| FOXM1   | PEG12  | 1448834_at   | 1420406_at | 0.9267 |
| SUPT16H | PEG12  | 1449578_at   | 1420406_at | 0.8271 |
| TCERG1  | PEG12  | 1450100_a_at | 1420406_at | 0.8695 |
| ASCL1   | PEG12  | 1450164_at   | 1420406_at | 0.8658 |
| ZFP354C | PEG12  | 1450321_at   | 1420406_at | 0.8419 |
| MYBL1   | PEG12  | 1450481_at   | 1420406_at | 0.8106 |
| SOX3    | PEG12  | 1450485_at   | 1420406_at | 0.8529 |
| SALL1   | PEG12  | 1450489_at   | 1420406_at | 0.8221 |
| HMGA2   | PEG12  | 1450780_s_at | 1420406_at | 0.8036 |
| NCOR2   | PEG12  | 1451841_a_at | 1420406_at | 0.8742 |
| ZFP2    | PEG12  | 1452025_a_at | 1420406_at | 0.8656 |
| CENPF   | PEG12  | 1452334_at   | 1420406_at | 0.8474 |
| TTF2    | PEG12  | 1452818_at   | 1420406_at | 0.8623 |
| PHF6    | PEG12  | 1453761_at   | 1420406_at | 0.8779 |
| TAF2    | PEG12  | 1457351_at   | 1420406_at | 0.8801 |
| HOXA1   | EIF2S1 | 1420565_at   | 1420491_at | 0.9895 |
| ETV5    | EIF2S1 | 1420998_at   | 1420491_at | 0.8446 |
| ZIK1    | EIF2S1 | 1421395_at   | 1420491_at | 0.8546 |
| RAD51L1 | EIF2S1 | 1421430_at   | 1420491_at | 0.9257 |
| CBX5    | EIF2S1 | 1421933_at   | 1420491_at | 0.8126 |
| HMGA2   | EIF2S1 | 1422851_at   | 1420491_at | 0.9347 |
| SUV39H2 | EIF2S1 | 1422979_at   | 1420491_at | 0.8242 |
| RAD51C  | EIF2S1 | 1423026_at   | 1420491_at | 0.8307 |
| RAD18   | EIF2S1 | 1423318_at   | 1420491_at | 0.9770 |
| SMARCC1 | EIF2S1 | 1423417_at   | 1420491_at | 0.8097 |
| HIP1    | EIF2S1 | 1424756_at   | 1420491_at | 0.8167 |
| PEG10   | EIF2S1 | 1427550_at   | 1420491_at | 0.9555 |
| CAND1   | EIF2S1 | 1428649_at   | 1420491_at | 0.8544 |
| MCM8    | EIF2S1 | 1429557_at   | 1420491_at | 0.8925 |
| HELLS   | EIF2S1 | 1430139_at   | 1420491_at | 0.8228 |
| TGIF2   | EIF2S1 | 1431115_at   | 1420491_at | 0.8257 |
| SUV39H2 | EIF2S1 | 1433996_at   | 1420491_at | 0.8549 |
| PIF1    | EIF2S1 | 1436738_at   | 1420491_at | 0.9415 |
| RAD51C  | EIF2S1 | 1438453_at   | 1420491_at | 0.8382 |
| NKRF    | EIF2S1 | 1441325_at   | 1420491_at | 0.8517 |
| TAF1D   | EIF2S1 | 1442289_at   | 1420491_at | 0.9693 |
| SUPT16H | EIF2S1 | 1449578_at   | 1420491_at | 0.8417 |
| TCERG1  | EIF2S1 | 1450100_a_at | 1420491_at | 0.8511 |
| MED1    | EIF2S1 | 1450402_at   | 1420491_at | 0.9194 |
| MYBL1   | EIF2S1 | 1450481_at   | 1420491_at | 0.9451 |
| SOX3    | EIF2S1 | 1450485_at   | 1420491_at | 0.8345 |
| SALL1   | EIF2S1 | 1450489_at   | 1420491_at | 0.8268 |
| HMGA2   | EIF2S1 | 1450780_s_at | 1420491_at | 0.9431 |
| HMGA2   | EIF2S1 | 1450781_at   | 1420491_at | 0.9736 |
| ZNF451  | EIF2S1 | 1451816_at   | 1420491_at | 0.9724 |
| ZBED3   | EIF2S1 | 1452088_at   | 1420491_at | 0.9659 |
| MLF1IP  | EIF2S1 | 1452816_at   | 1420491_at | 0.9300 |
| TTF2    | EIF2S1 | 1452818_at   | 1420491_at | 0.8861 |

|         |        |              |            |        |
|---------|--------|--------------|------------|--------|
| HELLS   | EIF2S1 | 1453361_at   | 1420491_at | 0.9228 |
| PHF6    | EIF2S1 | 1453761_at   | 1420491_at | 0.8898 |
| TAF2    | EIF2S1 | 1457351_at   | 1420491_at | 0.8558 |
| HOXA1   | DCBLD2 | 1420565_at   | 1420526_at | 0.9559 |
| RAD51L1 | DCBLD2 | 1421430_at   | 1420526_at | 0.9660 |
| CBX5    | DCBLD2 | 1421933_at   | 1420526_at | 0.8396 |
| HMGA2   | DCBLD2 | 1422851_at   | 1420526_at | 0.8653 |
| RAD18   | DCBLD2 | 1423318_at   | 1420526_at | 0.9372 |
| PEG10   | DCBLD2 | 1427550_at   | 1420526_at | 0.9789 |
| MCM8    | DCBLD2 | 1429557_at   | 1420526_at | 0.8094 |
| PIF1    | DCBLD2 | 1436738_at   | 1420526_at | 0.8838 |
| TAF1D   | DCBLD2 | 1442289_at   | 1420526_at | 0.9294 |
| MED1    | DCBLD2 | 1450402_at   | 1420526_at | 0.9364 |
| MYBL1   | DCBLD2 | 1450481_at   | 1420526_at | 0.9026 |
| HMGA2   | DCBLD2 | 1450780_s_at | 1420526_at | 0.8909 |
| HMGA2   | DCBLD2 | 1450781_at   | 1420526_at | 0.9468 |
| ZNF451  | DCBLD2 | 1451816_at   | 1420526_at | 0.9248 |
| ZBED3   | DCBLD2 | 1452088_at   | 1420526_at | 0.9406 |
| MLF1IP  | DCBLD2 | 1452816_at   | 1420526_at | 0.9030 |
| TTF2    | DCBLD2 | 1452818_at   | 1420526_at | 0.8274 |
| HELLS   | DCBLD2 | 1453361_at   | 1420526_at | 0.8907 |
| ETV5    | GALC   | 1420998_at   | 1420547_at | 0.9449 |
| ATN1    | GALC   | 1421149_a_at | 1420547_at | 0.8180 |
| ZIK1    | GALC   | 1421395_at   | 1420547_at | 0.9533 |
| NPAS3   | GALC   | 1421567_at   | 1420547_at | 0.9547 |
| SF1     | GALC   | 1422321_a_at | 1420547_at | 0.9430 |
| ILF3    | GALC   | 1422546_at   | 1420547_at | 0.8566 |
| HMGA2   | GALC   | 1422851_at   | 1420547_at | 0.8474 |
| SUV39H2 | GALC   | 1422979_at   | 1420547_at | 0.9430 |
| RAD51C  | GALC   | 1423026_at   | 1420547_at | 0.9722 |
| SMARCC1 | GALC   | 1423417_at   | 1420547_at | 0.9069 |
| HIP1    | GALC   | 1424756_at   | 1420547_at | 0.9699 |
| PSRC1   | GALC   | 1425416_s_at | 1420547_at | 0.9871 |
| CAND1   | GALC   | 1428649_at   | 1420547_at | 0.9383 |
| ZNF157  | GALC   | 1428887_at   | 1420547_at | 0.9668 |
| MCM8    | GALC   | 1429557_at   | 1420547_at | 0.8601 |
| HELLS   | GALC   | 1430139_at   | 1420547_at | 0.8727 |
| TLE4    | GALC   | 1430384_at   | 1420547_at | 0.8535 |
| TGIF2   | GALC   | 1431115_at   | 1420547_at | 0.8945 |
| ERCC4   | GALC   | 1432272_a_at | 1420547_at | 0.9813 |
| SUV39H2 | GALC   | 1433996_at   | 1420547_at | 0.8759 |
| PIF1    | GALC   | 1436738_at   | 1420547_at | 0.8218 |
| SOX11   | GALC   | 1436790_a_at | 1420547_at | 0.8950 |
| ASCL1   | GALC   | 1437086_at   | 1420547_at | 0.8645 |
| RAD51C  | GALC   | 1438453_at   | 1420547_at | 0.8716 |
| NKRF    | GALC   | 1441325_at   | 1420547_at | 0.9500 |
| FOXM1   | GALC   | 1448834_at   | 1420547_at | 0.9585 |
| SOX4    | GALC   | 1449370_at   | 1420547_at | 0.8648 |
| SUPT16H | GALC   | 1449578_at   | 1420547_at | 0.9106 |
| TCERG1  | GALC   | 1450100_a_at | 1420547_at | 0.9479 |
| ASCL1   | GALC   | 1450164_at   | 1420547_at | 0.9585 |

|         |               |              |              |        |
|---------|---------------|--------------|--------------|--------|
| ZFP354C | GALC          | 1450321_at   | 1420547_at   | 0.9523 |
| MYBL1   | GALC          | 1450481_at   | 1420547_at   | 0.8612 |
| SOX3    | GALC          | 1450485_at   | 1420547_at   | 0.9451 |
| SALL1   | GALC          | 1450489_at   | 1420547_at   | 0.8165 |
| HMGA2   | GALC          | 1450780_s_at | 1420547_at   | 0.8372 |
| ZNF451  | GALC          | 1451816_at   | 1420547_at   | 0.8308 |
| NCOR2   | GALC          | 1451841_a_at | 1420547_at   | 0.9732 |
| ZFP2    | GALC          | 1452025_a_at | 1420547_at   | 0.9588 |
| CENPF   | GALC          | 1452334_at   | 1420547_at   | 0.9396 |
| MLF1IP  | GALC          | 1452816_at   | 1420547_at   | 0.8098 |
| TTF2    | GALC          | 1452818_at   | 1420547_at   | 0.9069 |
| PHF6    | GALC          | 1453761_at   | 1420547_at   | 0.9465 |
| TAF2    | GALC          | 1457351_at   | 1420547_at   | 0.9451 |
| ZNF69   | GALC          | 1458274_at   | 1420547_at   | 0.8440 |
| HOXA1   | ETV5          | 1420565_at   | 1420998_at   | 0.8261 |
| HOXA1   | ZIK1          | 1420565_at   | 1421395_at   | 0.8307 |
| HOXA1   | RAD51L1       | 1420565_at   | 1421430_at   | 0.9327 |
| HOXA1   | LRP8          | 1420565_at   | 1421459_a_at | 0.8182 |
| HOXA1   | SORCS1        | 1420565_at   | 1421509_at   | 0.9613 |
| HOXA1   | CBX5          | 1420565_at   | 1421933_at   | 0.8142 |
| HOXA1   | CRKL          | 1420565_at   | 1421953_at   | 0.8304 |
| HOXA1   | HMGA2         | 1420565_at   | 1422851_at   | 0.9286 |
| HOXA1   | SUV39H2       | 1420565_at   | 1422979_at   | 0.8043 |
| HOXA1   | RAD51C        | 1420565_at   | 1423026_at   | 0.8032 |
| HOXA1   | INCENP        | 1420565_at   | 1423093_at   | 0.9044 |
| HOXA1   | RAD18         | 1420565_at   | 1423318_at   | 0.9736 |
| HOXA1   | MASTL         | 1420565_at   | 1423524_at   | 0.8177 |
| HOXA1   | TMEM48        | 1420565_at   | 1424173_at   | 0.8120 |
| HOXA1   | CAMKK2        | 1420565_at   | 1424476_at   | 0.9662 |
| HOXA1   | WDR62         | 1420565_at   | 1424849_at   | 0.8218 |
| HOXA1   | CD109         | 1420565_at   | 1425658_at   | 0.8617 |
| HOXA1   | CCDC77        | 1420565_at   | 1425734_a_at | 0.8930 |
| HOXA1   | CDC7          | 1420565_at   | 1426021_a_at | 0.8286 |
| HOXA1   | RG9MTD2       | 1420565_at   | 1427375_at   | 0.8345 |
| HOXA1   | PEG10         | 1420565_at   | 1427550_at   | 0.9643 |
| HOXA1   | FANCI         | 1420565_at   | 1427953_at   | 0.8455 |
| HOXA1   | CAND1         | 1420565_at   | 1428649_at   | 0.8423 |
| HOXA1   | SPDYA         | 1420565_at   | 1429470_at   | 0.8608 |
| HOXA1   | MCM8          | 1420565_at   | 1429557_at   | 0.8584 |
| HOXA1   | SMC2          | 1420565_at   | 1429659_at   | 0.8033 |
| HOXA1   | CEP70         | 1420565_at   | 1430231_a_at | 0.8070 |
| HOXA1   | NCAPD3        | 1420565_at   | 1430782_at   | 0.8312 |
| HOXA1   | RCBTB2        | 1420565_at   | 1431017_at   | 0.8917 |
| HOXA1   | MPHOSPH9      | 1420565_at   | 1431053_at   | 0.8426 |
| HOXA1   | PGAP1         | 1420565_at   | 1431169_at   | 0.8103 |
| HOXA1   | MATR3         | 1420565_at   | 1431235_at   | 0.9564 |
| HOXA1   | 4933432K03RIK | 1420565_at   | 1431489_at   | 0.9677 |
| HOXA1   | PPIH          | 1420565_at   | 1431505_at   | 0.8858 |
| HOXA1   | 2610021K21RIK | 1420565_at   | 1431667_s_at | 0.8233 |
| HOXA1   | PIGN          | 1420565_at   | 1432115_a_at | 0.8556 |
| HOXA1   | MIPOL1        | 1420565_at   | 1432284_at   | 0.9791 |

|       |               |            |              |        |
|-------|---------------|------------|--------------|--------|
| HOXA1 | THG1L         | 1420565_at | 1432393_a_at | 0.9149 |
| HOXA1 | 1700106N22RIK | 1420565_at | 1432504_at   | 0.8848 |
| HOXA1 | SUV39H2       | 1420565_at | 1433996_at   | 0.8250 |
| HOXA1 | GEMIN5        | 1420565_at | 1436311_at   | 0.8482 |
| HOXA1 | CD109         | 1420565_at | 1436346_at   | 0.8588 |
| HOXA1 | ZBTB12        | 1420565_at | 1436382_at   | 0.9495 |
| HOXA1 | PPP1R14B      | 1420565_at | 1436716_at   | 0.9762 |
| HOXA1 | PIF1          | 1420565_at | 1436738_at   | 0.9310 |
| HOXA1 | 4922501L14RIK | 1420565_at | 1436969_at   | 0.8466 |
| HOXA1 | 2810408I11RIK | 1420565_at | 1437549_at   | 0.9142 |
| HOXA1 | PIGT          | 1420565_at | 1437594_x_at | 0.9581 |
| HOXA1 | 4933432K03RIK | 1420565_at | 1438356_x_at | 0.8452 |
| HOXA1 | RAD51C        | 1420565_at | 1438453_at   | 0.8229 |
| HOXA1 | DHX33         | 1420565_at | 1438765_at   | 0.8222 |
| HOXA1 | A1746468      | 1420565_at | 1439960_at   | 0.8475 |
| HOXA1 | KIF20B        | 1420565_at | 1440924_at   | 0.8553 |
| HOXA1 | A430071A18RIK | 1420565_at | 1441113_at   | 0.9727 |
| HOXA1 | MATR3         | 1420565_at | 1441272_at   | 0.9268 |
| HOXA1 | KBTBD8        | 1420565_at | 1441275_at   | 0.8861 |
| HOXA1 | NKRF          | 1420565_at | 1441325_at   | 0.8230 |
| HOXA1 | CCDC38        | 1420565_at | 1441965_at   | 0.9082 |
| HOXA1 | TAF1D         | 1420565_at | 1442289_at   | 0.9603 |
| HOXA1 | TTK           | 1420565_at | 1442594_at   | 0.8067 |
| HOXA1 | AW545941      | 1420565_at | 1443007_at   | 0.8317 |
| HOXA1 | BB444561      | 1420565_at | 1443171_at   | 0.8386 |
| HOXA1 | BM202761      | 1420565_at | 1443800_at   | 0.9536 |
| HOXA1 | ERCC6L        | 1420565_at | 1444024_at   | 0.8078 |
| HOXA1 | AV228095      | 1420565_at | 1444443_at   | 0.8653 |
| HOXA1 | C530044C16RIK | 1420565_at | 1445247_at   | 0.9130 |
| HOXA1 | 9330118A15RIK | 1420565_at | 1446612_at   | 0.9373 |
| HOXA1 | BE953578      | 1420565_at | 1447298_at   | 0.8822 |
| HOXA1 | OGG1          | 1420565_at | 1448815_at   | 0.8706 |
| HOXA1 | SKP2          | 1420565_at | 1449293_a_at | 0.8323 |
| HOXA1 | SUPT16H       | 1420565_at | 1449578_at   | 0.8192 |
| HOXA1 | CCNB1         | 1420565_at | 1449675_at   | 0.8341 |
| HOXA1 | 4933411K20RIK | 1420565_at | 1450076_at   | 0.8377 |
| HOXA1 | TCERG1        | 1420565_at | 1450100_a_at | 0.8261 |
| HOXA1 | MED1          | 1420565_at | 1450402_at   | 0.9061 |
| HOXA1 | MYBL1         | 1420565_at | 1450481_at   | 0.9257 |
| HOXA1 | SOX3          | 1420565_at | 1450485_at   | 0.8132 |
| HOXA1 | SALL1         | 1420565_at | 1450489_at   | 0.8160 |
| HOXA1 | HMGA2         | 1420565_at | 1450780_s_at | 0.9310 |
| HOXA1 | HMGA2         | 1420565_at | 1450781_at   | 0.9837 |
| HOXA1 | ZNF451        | 1420565_at | 1451816_at   | 0.9610 |
| HOXA1 | LMNB2         | 1420565_at | 1451849_a_at | 0.8766 |
| HOXA1 | ZBED3         | 1420565_at | 1452088_at   | 0.9641 |
| HOXA1 | RRP1B         | 1420565_at | 1452119_at   | 0.8136 |
| HOXA1 | MLF1IP        | 1420565_at | 1452816_at   | 0.9072 |
| HOXA1 | TTF2          | 1420565_at | 1452818_at   | 0.8669 |
| HOXA1 | TMEM138       | 1420565_at | 1452978_at   | 0.8395 |
| HOXA1 | HELLS         | 1420565_at | 1453361_at   | 0.9108 |

|         |               |              |              |        |
|---------|---------------|--------------|--------------|--------|
| HOXA1   | TROAP         | 1420565_at   | 1453370_at   | 0.8640 |
| HOXA1   | CEP55         | 1420565_at   | 1453683_a_at | 0.8892 |
| HOXA1   | PHF6          | 1420565_at   | 1453761_at   | 0.8730 |
| HOXA1   | CCDC77        | 1420565_at   | 1454228_a_at | 0.9189 |
| HOXA1   | EXOD1         | 1420565_at   | 1454229_a_at | 0.8086 |
| HOXA1   | UTP23         | 1420565_at   | 1455259_a_at | 0.8557 |
| HOXA1   | IER5L         | 1420565_at   | 1455881_at   | 0.8608 |
| HOXA1   | 2700049P18RIK | 1420565_at   | 1456163_at   | 0.8592 |
| HOXA1   | DTL           | 1420565_at   | 1456652_at   | 0.8277 |
| HOXA1   | RTEL1         | 1420565_at   | 1456729_x_at | 0.8253 |
| HOXA1   | AV254764      | 1420565_at   | 1456951_at   | 0.8832 |
| HOXA1   | TAF2          | 1420565_at   | 1457351_at   | 0.8296 |
| HOXA1   | ETAA1         | 1420565_at   | 1457882_at   | 0.9479 |
| HOXA1   | MTR           | 1420565_at   | 1458532_at   | 0.8266 |
| HOXA1   | RNF219        | 1420565_at   | 1458636_at   | 0.8523 |
| HOXA1   | BB463474      | 1420565_at   | 1458902_at   | 0.9501 |
| HOXA1   | AA763515      | 1420565_at   | 1460065_at   | 0.9763 |
| ETV5    | WNT7B         | 1420998_at   | 1420891_at   | 0.9080 |
| ATN1    | WNT7B         | 1421149_a_at | 1420891_at   | 0.8177 |
| ZIK1    | WNT7B         | 1421395_at   | 1420891_at   | 0.8314 |
| NPAS3   | WNT7B         | 1421567_at   | 1420891_at   | 0.8824 |
| POU3F4  | WNT7B         | 1422164_at   | 1420891_at   | 0.8181 |
| SF1     | WNT7B         | 1422321_a_at | 1420891_at   | 0.8909 |
| SUV39H2 | WNT7B         | 1422979_at   | 1420891_at   | 0.8077 |
| RAD51C  | WNT7B         | 1423026_at   | 1420891_at   | 0.8532 |
| HIP1    | WNT7B         | 1424756_at   | 1420891_at   | 0.8968 |
| PSRC1   | WNT7B         | 1425416_s_at | 1420891_at   | 0.8908 |
| CAND1   | WNT7B         | 1428649_at   | 1420891_at   | 0.8412 |
| ZNF157  | WNT7B         | 1428887_at   | 1420891_at   | 0.8893 |
| TLE4    | WNT7B         | 1430384_at   | 1420891_at   | 0.8688 |
| TGIF2   | WNT7B         | 1431115_at   | 1420891_at   | 0.8535 |
| ERCC4   | WNT7B         | 1432272_a_at | 1420891_at   | 0.8848 |
| ASCL1   | WNT7B         | 1437086_at   | 1420891_at   | 0.8227 |
| NKRF    | WNT7B         | 1441325_at   | 1420891_at   | 0.8487 |
| FOXM1   | WNT7B         | 1448834_at   | 1420891_at   | 0.8687 |
| TCERG1  | WNT7B         | 1450100_a_at | 1420891_at   | 0.8294 |
| ASCL1   | WNT7B         | 1450164_at   | 1420891_at   | 0.8862 |
| NPAS3   | WNT7B         | 1450287_at   | 1420891_at   | 0.8714 |
| ZFP354C | WNT7B         | 1450321_at   | 1420891_at   | 0.8946 |
| SOX3    | WNT7B         | 1450485_at   | 1420891_at   | 0.8718 |
| NCOR2   | WNT7B         | 1451841_a_at | 1420891_at   | 0.9051 |
| ZFP2    | WNT7B         | 1452025_a_at | 1420891_at   | 0.8146 |
| CENPF   | WNT7B         | 1452334_at   | 1420891_at   | 0.8271 |
| TTF2    | WNT7B         | 1452818_at   | 1420891_at   | 0.8296 |
| PHF6    | WNT7B         | 1453761_at   | 1420891_at   | 0.8217 |
| TAF2    | WNT7B         | 1457351_at   | 1420891_at   | 0.8340 |
| ETV5    | ATN1          | 1420998_at   | 1421149_a_at | 0.8662 |
| ETV5    | FZD3          | 1420998_at   | 1421157_at   | 0.8058 |
| ETV5    | ADAM12        | 1420998_at   | 1421171_at   | 0.9392 |
| ETV5    | MTAP2         | 1420998_at   | 1421327_at   | 0.9616 |
| ETV5    | MTAP2         | 1420998_at   | 1421328_at   | 0.9265 |

|      |               |            |              |        |
|------|---------------|------------|--------------|--------|
| ETV5 | ZIK1          | 1420998_at | 1421395_at   | 0.9488 |
| ETV5 | LRP8          | 1420998_at | 1421459_a_at | 0.9089 |
| ETV5 | SORCS1        | 1420998_at | 1421509_at   | 0.8813 |
| ETV5 | NPAS3         | 1420998_at | 1421567_at   | 0.9549 |
| ETV5 | CRKL          | 1420998_at | 1421953_at   | 0.9159 |
| ETV5 | NPTX1         | 1420998_at | 1422130_at   | 0.8268 |
| ETV5 | POU3F4        | 1420998_at | 1422164_at   | 0.8216 |
| ETV5 | CDC25C        | 1420998_at | 1422252_a_at | 0.9166 |
| ETV5 | SF1           | 1420998_at | 1422321_a_at | 0.9531 |
| ETV5 | RAB23         | 1420998_at | 1422399_a_at | 0.9482 |
| ETV5 | HMGA2         | 1420998_at | 1422851_at   | 0.9226 |
| ETV5 | SUV39H2       | 1420998_at | 1422979_at   | 0.9268 |
| ETV5 | RAD51C        | 1420998_at | 1423026_at   | 0.9562 |
| ETV5 | INCENP        | 1420998_at | 1423093_at   | 0.9400 |
| ETV5 | RAD18         | 1420998_at | 1423318_at   | 0.8825 |
| ETV5 | SMARCC1       | 1420998_at | 1423417_at   | 0.8919 |
| ETV5 | D2ERTD750E    | 1420998_at | 1423464_at   | 0.9614 |
| ETV5 | SEPT2         | 1420998_at | 1423473_at   | 0.8946 |
| ETV5 | MASTL         | 1420998_at | 1423524_at   | 0.9440 |
| ETV5 | MASTL         | 1420998_at | 1423525_at   | 0.9544 |
| ETV5 | KCNC1         | 1420998_at | 1423559_at   | 0.8185 |
| ETV5 | TMEM48        | 1420998_at | 1424173_at   | 0.9624 |
| ETV5 | CAMKK2        | 1420998_at | 1424476_at   | 0.8248 |
| ETV5 | HIP1          | 1420998_at | 1424756_at   | 0.9681 |
| ETV5 | WDR62         | 1420998_at | 1424849_at   | 0.9193 |
| ETV5 | HUS1          | 1420998_at | 1425366_a_at | 0.9180 |
| ETV5 | PSRC1         | 1420998_at | 1425416_s_at | 0.9484 |
| ETV5 | CD109         | 1420998_at | 1425658_at   | 0.9716 |
| ETV5 | CCDC77        | 1420998_at | 1425734_a_at | 0.9477 |
| ETV5 | FANCI         | 1420998_at | 1425941_a_at | 0.9153 |
| ETV5 | CDC7          | 1420998_at | 1426021_a_at | 0.9629 |
| ETV5 | PVT1          | 1420998_at | 1427140_at   | 0.8359 |
| ETV5 | RG9MTD2       | 1420998_at | 1427375_at   | 0.9226 |
| ETV5 | FANCI         | 1420998_at | 1427953_at   | 0.9571 |
| ETV5 | SRGAP2        | 1420998_at | 1427967_at   | 0.9440 |
| ETV5 | CAND1         | 1420998_at | 1428649_at   | 0.9588 |
| ETV5 | ZNF157        | 1420998_at | 1428887_at   | 0.9066 |
| ETV5 | RASL11A       | 1420998_at | 1429444_at   | 0.8587 |
| ETV5 | MCM8          | 1420998_at | 1429557_at   | 0.8546 |
| ETV5 | SMC2          | 1420998_at | 1429659_at   | 0.9043 |
| ETV5 | 6230416J20RIK | 1420998_at | 1429665_at   | 0.8829 |
| ETV5 | 4632434I11RIK | 1420998_at | 1429734_at   | 0.9243 |
| ETV5 | HELLS         | 1420998_at | 1430139_at   | 0.8981 |
| ETV5 | CEP70         | 1420998_at | 1430231_a_at | 0.9426 |
| ETV5 | NUP205        | 1420998_at | 1430343_at   | 0.8786 |
| ETV5 | TLE4          | 1420998_at | 1430384_at   | 0.8131 |
| ETV5 | NCAPD3        | 1420998_at | 1430782_at   | 0.8779 |
| ETV5 | TGIF2         | 1420998_at | 1431115_at   | 0.9348 |
| ETV5 | PGAP1         | 1420998_at | 1431169_at   | 0.8960 |
| ETV5 | DLG5          | 1420998_at | 1431187_s_at | 0.8986 |
| ETV5 | PVT1          | 1420998_at | 1431352_s_at | 0.8455 |

|      |               |            |              |        |
|------|---------------|------------|--------------|--------|
| ETV5 | JAM2          | 1420998_at | 1431416_a_at | 0.8631 |
| ETV5 | 4933432K03RIK | 1420998_at | 1431489_at   | 0.9072 |
| ETV5 | 2610021K21RIK | 1420998_at | 1431667_s_at | 0.8859 |
| ETV5 | RAB31         | 1420998_at | 1431691_a_at | 0.9215 |
| ETV5 | PIGN          | 1420998_at | 1432115_a_at | 0.9351 |
| ETV5 | ERCC4         | 1420998_at | 1432272_a_at | 0.9387 |
| ETV5 | MIPOL1        | 1420998_at | 1432284_at   | 0.8061 |
| ETV5 | ARMC9         | 1420998_at | 1432383_a_at | 0.9316 |
| ETV5 | 1700106N22RIK | 1420998_at | 1432504_at   | 0.9251 |
| ETV5 | SUV39H2       | 1420998_at | 1433996_at   | 0.8803 |
| ETV5 | NPHP4         | 1420998_at | 1434024_at   | 0.9078 |
| ETV5 | SRGAP2        | 1420998_at | 1434407_at   | 0.8313 |
| ETV5 | SOX3          | 1420998_at | 1435192_at   | 0.8177 |
| ETV5 | EXOD1         | 1420998_at | 1435390_at   | 0.8432 |
| ETV5 | CD109         | 1420998_at | 1436346_at   | 0.9724 |
| ETV5 | CEP78         | 1420998_at | 1436352_at   | 0.8652 |
| ETV5 | ZBTB12        | 1420998_at | 1436382_at   | 0.9207 |
| ETV5 | SDC3          | 1420998_at | 1436482_a_at | 0.8238 |
| ETV5 | PIF1          | 1420998_at | 1436738_at   | 0.9110 |
| ETV5 | SOX11         | 1420998_at | 1436790_a_at | 0.8473 |
| ETV5 | 4922501L14RIK | 1420998_at | 1436969_at   | 0.8422 |
| ETV5 | ASCL1         | 1420998_at | 1437086_at   | 0.8709 |
| ETV5 | LRRC4B        | 1420998_at | 1437183_at   | 0.8275 |
| ETV5 | 2810408I11RIK | 1420998_at | 1437549_at   | 0.9396 |
| ETV5 | AV164956      | 1420998_at | 1437673_at   | 0.9239 |
| ETV5 | HEATR5B       | 1420998_at | 1438085_at   | 0.8622 |
| ETV5 | 4933432K03RIK | 1420998_at | 1438356_x_at | 0.9500 |
| ETV5 | RAD51C        | 1420998_at | 1438453_at   | 0.8842 |
| ETV5 | DHX33         | 1420998_at | 1438765_at   | 0.9335 |
| ETV5 | AHI1          | 1420998_at | 1439083_at   | 0.8631 |
| ETV5 | FANCD2        | 1420998_at | 1439091_at   | 0.8888 |
| ETV5 | A1506816      | 1420998_at | 1439483_at   | 0.9393 |
| ETV5 | A1746468      | 1420998_at | 1439960_at   | 0.9453 |
| ETV5 | ABCC12        | 1420998_at | 1439985_at   | 0.8889 |
| ETV5 | A930024E05RIK | 1420998_at | 1440206_at   | 0.9196 |
| ETV5 | SPRY4         | 1420998_at | 1440867_at   | 0.8664 |
| ETV5 | KIF20B        | 1420998_at | 1440924_at   | 0.8792 |
| ETV5 | A430071A18RIK | 1420998_at | 1441113_at   | 0.8777 |
| ETV5 | MATR3         | 1420998_at | 1441272_at   | 0.8973 |
| ETV5 | KBTBD8        | 1420998_at | 1441275_at   | 0.9410 |
| ETV5 | NKRF          | 1420998_at | 1441325_at   | 0.9467 |
| ETV5 | AU043080      | 1420998_at | 1441375_at   | 0.8771 |
| ETV5 | ASPM          | 1420998_at | 1441520_at   | 0.8350 |
| ETV5 | D2ERTD750E    | 1420998_at | 1442280_at   | 0.8997 |
| ETV5 | TAF1D         | 1420998_at | 1442289_at   | 0.8646 |
| ETV5 | NUP188        | 1420998_at | 1442314_at   | 0.8126 |
| ETV5 | TTK           | 1420998_at | 1442594_at   | 0.9493 |
| ETV5 | AW545941      | 1420998_at | 1443007_at   | 0.8230 |
| ETV5 | BB337104      | 1420998_at | 1443026_at   | 0.8533 |
| ETV5 | BB444561      | 1420998_at | 1443171_at   | 0.9379 |
| ETV5 | BB130444      | 1420998_at | 1443410_at   | 0.8218 |

|      |               |            |              |        |
|------|---------------|------------|--------------|--------|
| ETV5 | BM202761      | 1420998_at | 1443800_at   | 0.8490 |
| ETV5 | ZBTB39        | 1420998_at | 1443880_at   | 0.9252 |
| ETV5 | CDK5RAP2      | 1420998_at | 1443976_at   | 0.8767 |
| ETV5 | ERCC6L        | 1420998_at | 1444024_at   | 0.9539 |
| ETV5 | AV228095      | 1420998_at | 1444443_at   | 0.9410 |
| ETV5 | 6530418L21RIK | 1420998_at | 1444723_at   | 0.9212 |
| ETV5 | MASTL         | 1420998_at | 1444725_at   | 0.8926 |
| ETV5 | BC023969      | 1420998_at | 1445226_at   | 0.9470 |
| ETV5 | C530044C16RIK | 1420998_at | 1445247_at   | 0.8677 |
| ETV5 | AV323315      | 1420998_at | 1445298_at   | 0.8942 |
| ETV5 | KCND3         | 1420998_at | 1447513_at   | 0.9678 |
| ETV5 | SEMA6D        | 1420998_at | 1448060_at   | 0.9196 |
| ETV5 | OGG1          | 1420998_at | 1448815_at   | 0.9217 |
| ETV5 | FOXM1         | 1420998_at | 1448834_at   | 0.9439 |
| ETV5 | SKP2          | 1420998_at | 1449293_a_at | 0.9565 |
| ETV5 | SOX4          | 1420998_at | 1449370_at   | 0.8077 |
| ETV5 | SUPT16H       | 1420998_at | 1449578_at   | 0.9037 |
| ETV5 | CCNB1         | 1420998_at | 1449675_at   | 0.9393 |
| ETV5 | LFNG          | 1420998_at | 1449943_at   | 0.9077 |
| ETV5 | APC           | 1420998_at | 1450056_at   | 0.8746 |
| ETV5 | 4933411K20RIK | 1420998_at | 1450076_at   | 0.9414 |
| ETV5 | TCERG1        | 1420998_at | 1450100_a_at | 0.9385 |
| ETV5 | ASCL1         | 1420998_at | 1450164_at   | 0.9488 |
| ETV5 | NPAS3         | 1420998_at | 1450287_at   | 0.8685 |
| ETV5 | ZFP354C       | 1420998_at | 1450321_at   | 0.8816 |
| ETV5 | SHC3          | 1420998_at | 1450326_at   | 0.9244 |
| ETV5 | MYBL1         | 1420998_at | 1450481_at   | 0.9047 |
| ETV5 | SOX3          | 1420998_at | 1450485_at   | 0.9531 |
| ETV5 | SALL1         | 1420998_at | 1450489_at   | 0.8151 |
| ETV5 | HMGA2         | 1420998_at | 1450780_s_at | 0.9104 |
| ETV5 | HMGA2         | 1420998_at | 1450781_at   | 0.8383 |
| ETV5 | ZNF451        | 1420998_at | 1451816_at   | 0.9078 |
| ETV5 | NCOR2         | 1420998_at | 1451841_a_at | 0.9381 |
| ETV5 | LMNB2         | 1420998_at | 1451849_a_at | 0.9038 |
| ETV5 | ZFP2          | 1420998_at | 1452025_a_at | 0.9017 |
| ETV5 | 6720460F02RIK | 1420998_at | 1452073_at   | 0.9389 |
| ETV5 | ZBED3         | 1420998_at | 1452088_at   | 0.8733 |
| ETV5 | RRP1B         | 1420998_at | 1452119_at   | 0.9053 |
| ETV5 | NOVA1         | 1420998_at | 1452245_at   | 0.8611 |
| ETV5 | CENPF         | 1420998_at | 1452334_at   | 0.8607 |
| ETV5 | ASPM          | 1420998_at | 1452459_at   | 0.9210 |
| ETV5 | AAK1          | 1420998_at | 1452632_at   | 0.8182 |
| ETV5 | MLF1IP        | 1420998_at | 1452816_at   | 0.8630 |
| ETV5 | TTF2          | 1420998_at | 1452818_at   | 0.9507 |
| ETV5 | TMEM138       | 1420998_at | 1452978_at   | 0.9030 |
| ETV5 | RHOBTB3       | 1420998_at | 1453227_at   | 0.9543 |
| ETV5 | CALR3         | 1420998_at | 1453232_at   | 0.8220 |
| ETV5 | HELLS         | 1420998_at | 1453361_at   | 0.8652 |
| ETV5 | TROAP         | 1420998_at | 1453370_at   | 0.9521 |
| ETV5 | CEP55         | 1420998_at | 1453683_a_at | 0.9578 |
| ETV5 | DHX38         | 1420998_at | 1453751_at   | 0.9103 |



|      |                       |              |                       |        |
|------|-----------------------|--------------|-----------------------|--------|
| ETV5 | PHF6                  | 1420998_at   | 1453761_at            | 0.9596 |
| ETV5 | FAM110A               | 1420998_at   | 1453768_a_at          | 0.8590 |
| ETV5 | NETO2                 | 1420998_at   | 1454032_at            | 0.8821 |
| ETV5 | CCDC77                | 1420998_at   | 1454228_a_at          | 0.9279 |
| ETV5 | EXOD1                 | 1420998_at   | 1454229_a_at          | 0.9552 |
| ETV5 | UTP23                 | 1420998_at   | 1455259_a_at          | 0.9197 |
| ETV5 | IER5L                 | 1420998_at   | 1455881_at            | 0.8048 |
| ETV5 | ATP5G2                | 1420998_at   | 1456128_at            | 0.8093 |
| ETV5 | 2700049P18RIK         | 1420998_at   | 1456163_at            | 0.9433 |
| ETV5 | RTEL1                 | 1420998_at   | 1456729_x_at          | 0.8020 |
| ETV5 | BB053540              | 1420998_at   | 1456840_at            | 0.8558 |
| ETV5 | AV254764              | 1420998_at   | 1456951_at            | 0.8928 |
| ETV5 | TAF2                  | 1420998_at   | 1457351_at            | 0.9398 |
| ETV5 | ZNF69                 | 1420998_at   | 1458274_at            | 0.8325 |
| ETV5 | MTR                   | 1420998_at   | 1458532_at            | 0.8397 |
| ETV5 | RNF219                | 1420998_at   | 1458636_at            | 0.9593 |
| ETV5 | BB463474              | 1420998_at   | 1458902_at            | 0.8355 |
| ETV5 | 6530418L21RIK         | 1420998_at   | 1459051_at            | 0.8545 |
| ETV5 | AFFX-DapX-5_at        | 1420998_at   | AFFX-DapX-5_at        | 0.8912 |
| ETV5 | AFFX-LysX-5_at        | 1420998_at   | AFFX-LysX-5_at        | 0.8316 |
| ETV5 | AFFX-r2-Bs-dap-5_at   | 1420998_at   | AFFX-r2-Bs-dap-5_at   | 0.8733 |
| ETV5 | AFFX-r2-Bs-lys-5_at   | 1420998_at   | AFFX-r2-Bs-lys-5_at   | 0.8696 |
| ETV5 | AFFX-r2-Bs-thr-5_s_at | 1420998_at   | AFFX-r2-Bs-thr-5_s_at | 0.8454 |
| ETV5 | AFFX-ThrX-5_at        | 1420998_at   | AFFX-ThrX-5_at        | 0.8446 |
| ATN1 | ADAM12                | 1421149_a_at | 1421171_at            | 0.8230 |
| ATN1 | MTAP2                 | 1421149_a_at | 1421327_at            | 0.8276 |
| ATN1 | NPAS3                 | 1421149_a_at | 1421567_at            | 0.8563 |
| ATN1 | SF1                   | 1421149_a_at | 1422321_a_at          | 0.8559 |
| ATN1 | RAB23                 | 1421149_a_at | 1422399_a_at          | 0.8057 |
| ATN1 | RAD51C                | 1421149_a_at | 1423026_at            | 0.8029 |
| ATN1 | D2ERTD750E            | 1421149_a_at | 1423464_at            | 0.8397 |
| ATN1 | MASTL                 | 1421149_a_at | 1423525_at            | 0.8221 |
| ATN1 | TMEM48                | 1421149_a_at | 1424173_at            | 0.8164 |
| ATN1 | HIP1                  | 1421149_a_at | 1424756_at            | 0.8295 |
| ATN1 | PSRC1                 | 1421149_a_at | 1425416_s_at          | 0.8397 |
| ATN1 | CD109                 | 1421149_a_at | 1425658_at            | 0.8152 |
| ATN1 | CDC7                  | 1421149_a_at | 1426021_a_at          | 0.8344 |
| ATN1 | SRGAP2                | 1421149_a_at | 1427967_at            | 0.8176 |
| ATN1 | CAND1                 | 1421149_a_at | 1428649_at            | 0.8361 |
| ATN1 | ZNF157                | 1421149_a_at | 1428887_at            | 0.8111 |
| ATN1 | RASL11A               | 1421149_a_at | 1429444_at            | 0.8015 |
| ATN1 | ERCC4                 | 1421149_a_at | 1432272_a_at          | 0.8153 |
| ATN1 | ARMC9                 | 1421149_a_at | 1432383_a_at          | 0.8259 |
| ATN1 | 1700106N22RIK         | 1421149_a_at | 1432504_at            | 0.8010 |
| ATN1 | NPHP4                 | 1421149_a_at | 1434024_at            | 0.8283 |
| ATN1 | CD109                 | 1421149_a_at | 1436346_at            | 0.8235 |
| ATN1 | SDC3                  | 1421149_a_at | 1436482_a_at          | 0.8220 |
| ATN1 | LRRC4B                | 1421149_a_at | 1437183_at            | 0.8060 |
| ATN1 | AV164956              | 1421149_a_at | 1437673_at            | 0.8011 |
| ATN1 | AI506816              | 1421149_a_at | 1439483_at            | 0.8223 |
| ATN1 | SPRY4                 | 1421149_a_at | 1440867_at            | 0.8177 |

|         |               |              |              |        |
|---------|---------------|--------------|--------------|--------|
| ATN1    | BB444561      | 1421149_a_at | 1443171_at   | 0.8083 |
| ATN1    | ZBTB39        | 1421149_a_at | 1443880_at   | 0.8145 |
| ATN1    | 6530418L21RIK | 1421149_a_at | 1444723_at   | 0.8341 |
| ATN1    | BC023969      | 1421149_a_at | 1445226_at   | 0.8211 |
| ATN1    | KCND3         | 1421149_a_at | 1447513_at   | 0.8144 |
| ATN1    | FOXM1         | 1421149_a_at | 1448834_at   | 0.8194 |
| ATN1    | LFNG          | 1421149_a_at | 1449943_at   | 0.8238 |
| ATN1    | ASCL1         | 1421149_a_at | 1450164_at   | 0.8381 |
| ATN1    | SOX3          | 1421149_a_at | 1450485_at   | 0.8292 |
| ATN1    | NCOR2         | 1421149_a_at | 1451841_a_at | 0.8391 |
| ATN1    | 6720460F02RIK | 1421149_a_at | 1452073_at   | 0.8103 |
| ATN1    | RHOBTB3       | 1421149_a_at | 1453227_at   | 0.8254 |
| ATN1    | PHF6          | 1421149_a_at | 1453761_at   | 0.8078 |
| ATN1    | FAM110A       | 1421149_a_at | 1453768_a_at | 0.8290 |
| ATN1    | NETO2         | 1421149_a_at | 1454032_at   | 0.8368 |
| HMGA2   | FZD3          | 1422851_at   | 1421157_at   | 0.8185 |
| TGIF2   | FZD3          | 1431115_at   | 1421157_at   | 0.8706 |
| SOX3    | FZD3          | 1435192_at   | 1421157_at   | 0.8315 |
| PIF1    | FZD3          | 1436738_at   | 1421157_at   | 0.8227 |
| ASCL1   | FZD3          | 1437086_at   | 1421157_at   | 0.8178 |
| TAF1D   | FZD3          | 1442289_at   | 1421157_at   | 0.8045 |
| FOXM1   | FZD3          | 1448834_at   | 1421157_at   | 0.8109 |
| MYBL1   | FZD3          | 1450481_at   | 1421157_at   | 0.8302 |
| HMGA2   | FZD3          | 1450780_s_at | 1421157_at   | 0.8178 |
| ZNF451  | FZD3          | 1451816_at   | 1421157_at   | 0.8076 |
| TTF2    | FZD3          | 1452818_at   | 1421157_at   | 0.8350 |
| PHF6    | FZD3          | 1453761_at   | 1421157_at   | 0.8044 |
| TAF2    | FZD3          | 1457351_at   | 1421157_at   | 0.8082 |
| ZIK1    | ADAM12        | 1421395_at   | 1421171_at   | 0.9444 |
| NPAS3   | ADAM12        | 1421567_at   | 1421171_at   | 0.9511 |
| SF1     | ADAM12        | 1422321_a_at | 1421171_at   | 0.9376 |
| ILF3    | ADAM12        | 1422546_at   | 1421171_at   | 0.8625 |
| HMGA2   | ADAM12        | 1422851_at   | 1421171_at   | 0.8951 |
| SUV39H2 | ADAM12        | 1422979_at   | 1421171_at   | 0.9244 |
| RAD51C  | ADAM12        | 1423026_at   | 1421171_at   | 0.9681 |
| SMARCC1 | ADAM12        | 1423417_at   | 1421171_at   | 0.9001 |
| HIP1    | ADAM12        | 1424756_at   | 1421171_at   | 0.9626 |
| PSRC1   | ADAM12        | 1425416_s_at | 1421171_at   | 0.9827 |
| CAND1   | ADAM12        | 1428649_at   | 1421171_at   | 0.9330 |
| ZNF157  | ADAM12        | 1428887_at   | 1421171_at   | 0.9617 |
| MCM8    | ADAM12        | 1429557_at   | 1421171_at   | 0.8521 |
| HELLS   | ADAM12        | 1430139_at   | 1421171_at   | 0.9025 |
| TLE4    | ADAM12        | 1430384_at   | 1421171_at   | 0.8377 |
| TGIF2   | ADAM12        | 1431115_at   | 1421171_at   | 0.8618 |
| ERCC4   | ADAM12        | 1432272_a_at | 1421171_at   | 0.9690 |
| SUV39H2 | ADAM12        | 1433996_at   | 1421171_at   | 0.8709 |
| SOX3    | ADAM12        | 1435192_at   | 1421171_at   | 0.8436 |
| PIF1    | ADAM12        | 1436738_at   | 1421171_at   | 0.8673 |
| SOX11   | ADAM12        | 1436790_a_at | 1421171_at   | 0.9004 |
| ASCL1   | ADAM12        | 1437086_at   | 1421171_at   | 0.9063 |
| RAD51C  | ADAM12        | 1438453_at   | 1421171_at   | 0.9155 |

|         |        |              |            |        |
|---------|--------|--------------|------------|--------|
| NKRF    | ADAM12 | 1441325_at   | 1421171_at | 0.9400 |
| FOXM1   | ADAM12 | 1448834_at   | 1421171_at | 0.9344 |
| SOX4    | ADAM12 | 1449370_at   | 1421171_at | 0.8777 |
| SUPT16H | ADAM12 | 1449578_at   | 1421171_at | 0.9039 |
| TCERG1  | ADAM12 | 1450100_a_at | 1421171_at | 0.9379 |
| ASCL1   | ADAM12 | 1450164_at   | 1421171_at | 0.9921 |
| ZFP354C | ADAM12 | 1450321_at   | 1421171_at | 0.9328 |
| MYBL1   | ADAM12 | 1450481_at   | 1421171_at | 0.8585 |
| SOX3    | ADAM12 | 1450485_at   | 1421171_at | 0.9382 |
| HMGA2   | ADAM12 | 1450780_s_at | 1421171_at | 0.8799 |
| ZNF451  | ADAM12 | 1451816_at   | 1421171_at | 0.8351 |
| NCOR2   | ADAM12 | 1451841_a_at | 1421171_at | 0.9606 |
| ZFP2    | ADAM12 | 1452025_a_at | 1421171_at | 0.9598 |
| CENPF   | ADAM12 | 1452334_at   | 1421171_at | 0.9274 |
| MLF1IP  | ADAM12 | 1452816_at   | 1421171_at | 0.8152 |
| TTF2    | ADAM12 | 1452818_at   | 1421171_at | 0.8952 |
| PHF6    | ADAM12 | 1453761_at   | 1421171_at | 0.9414 |
| TAF2    | ADAM12 | 1457351_at   | 1421171_at | 0.9363 |
| ZNF69   | ADAM12 | 1458274_at   | 1421171_at | 0.8327 |
| ZIK1    | ADAM12 | 1421395_at   | 1421172_at | 0.8038 |
| NPAS3   | ADAM12 | 1421567_at   | 1421172_at | 0.8029 |
| SF1     | ADAM12 | 1422321_a_at | 1421172_at | 0.8014 |
| ILF3    | ADAM12 | 1422546_at   | 1421172_at | 0.8479 |
| RAD51C  | ADAM12 | 1423026_at   | 1421172_at | 0.8296 |
| HIP1    | ADAM12 | 1424756_at   | 1421172_at | 0.8127 |
| PSRC1   | ADAM12 | 1425416_s_at | 1421172_at | 0.8396 |
| ZNF157  | ADAM12 | 1428887_at   | 1421172_at | 0.8246 |
| MCM8    | ADAM12 | 1429557_at   | 1421172_at | 0.8161 |
| HELLS   | ADAM12 | 1430139_at   | 1421172_at | 0.8007 |
| ERCC4   | ADAM12 | 1432272_a_at | 1421172_at | 0.8270 |
| SOX3    | ADAM12 | 1435192_at   | 1421172_at | 0.8477 |
| ASCL1   | ADAM12 | 1437086_at   | 1421172_at | 0.8288 |
| RAD51C  | ADAM12 | 1438453_at   | 1421172_at | 0.8125 |
| FOXM1   | ADAM12 | 1448834_at   | 1421172_at | 0.8293 |
| SOX4    | ADAM12 | 1449370_at   | 1421172_at | 0.8171 |
| ASCL1   | ADAM12 | 1450164_at   | 1421172_at | 0.8645 |
| NCOR2   | ADAM12 | 1451841_a_at | 1421172_at | 0.8139 |
| ZFP2    | ADAM12 | 1452025_a_at | 1421172_at | 0.8759 |
| PHF6    | ADAM12 | 1453761_at   | 1421172_at | 0.8002 |
| ZIK1    | MTAP2  | 1421395_at   | 1421327_at | 0.9696 |
| NPAS3   | MTAP2  | 1421567_at   | 1421327_at | 0.9514 |
| SF1     | MTAP2  | 1422321_a_at | 1421327_at | 0.9438 |
| ILF3    | MTAP2  | 1422546_at   | 1421327_at | 0.8392 |
| HMGA2   | MTAP2  | 1422851_at   | 1421327_at | 0.8754 |
| SUV39H2 | MTAP2  | 1422979_at   | 1421327_at | 0.9512 |
| RAD51C  | MTAP2  | 1423026_at   | 1421327_at | 0.9830 |
| RAD18   | MTAP2  | 1423318_at   | 1421327_at | 0.8221 |
| SMARCC1 | MTAP2  | 1423417_at   | 1421327_at | 0.9109 |
| HIP1    | MTAP2  | 1424756_at   | 1421327_at | 0.9747 |
| PSRC1   | MTAP2  | 1425416_s_at | 1421327_at | 0.9857 |
| CAND1   | MTAP2  | 1428649_at   | 1421327_at | 0.9487 |

|         |       |              |            |        |
|---------|-------|--------------|------------|--------|
| ZNF157  | MTAP2 | 1428887_at   | 1421327_at | 0.9536 |
| MCM8    | MTAP2 | 1429557_at   | 1421327_at | 0.8555 |
| HELLS   | MTAP2 | 1430139_at   | 1421327_at | 0.8953 |
| TLE4    | MTAP2 | 1430384_at   | 1421327_at | 0.8718 |
| TGIF2   | MTAP2 | 1431115_at   | 1421327_at | 0.9187 |
| ERCC4   | MTAP2 | 1432272_a_at | 1421327_at | 0.9832 |
| SUV39H2 | MTAP2 | 1433996_at   | 1421327_at | 0.9002 |
| SOX3    | MTAP2 | 1435192_at   | 1421327_at | 0.8195 |
| PIF1    | MTAP2 | 1436738_at   | 1421327_at | 0.8480 |
| SOX11   | MTAP2 | 1436790_a_at | 1421327_at | 0.9042 |
| ASCL1   | MTAP2 | 1437086_at   | 1421327_at | 0.8878 |
| RAD51C  | MTAP2 | 1438453_at   | 1421327_at | 0.8801 |
| NKRF    | MTAP2 | 1441325_at   | 1421327_at | 0.9623 |
| TAF1D   | MTAP2 | 1442289_at   | 1421327_at | 0.8161 |
| FOXM1   | MTAP2 | 1448834_at   | 1421327_at | 0.9559 |
| SOX4    | MTAP2 | 1449370_at   | 1421327_at | 0.8716 |
| SUPT16H | MTAP2 | 1449578_at   | 1421327_at | 0.9213 |
| TCERG1  | MTAP2 | 1450100_a_at | 1421327_at | 0.9590 |
| ASCL1   | MTAP2 | 1450164_at   | 1421327_at | 0.9649 |
| NPAS3   | MTAP2 | 1450287_at   | 1421327_at | 0.8412 |
| ZFP354C | MTAP2 | 1450321_at   | 1421327_at | 0.9407 |
| MYBL1   | MTAP2 | 1450481_at   | 1421327_at | 0.8891 |
| SOX3    | MTAP2 | 1450485_at   | 1421327_at | 0.9482 |
| HMGA2   | MTAP2 | 1450780_s_at | 1421327_at | 0.8658 |
| ZNF451  | MTAP2 | 1451816_at   | 1421327_at | 0.8596 |
| NCOR2   | MTAP2 | 1451841_a_at | 1421327_at | 0.9686 |
| ZFP2    | MTAP2 | 1452025_a_at | 1421327_at | 0.9372 |
| ZBED3   | MTAP2 | 1452088_at   | 1421327_at | 0.8102 |
| CENPF   | MTAP2 | 1452334_at   | 1421327_at | 0.9388 |
| MLF1IP  | MTAP2 | 1452816_at   | 1421327_at | 0.8483 |
| TTF2    | MTAP2 | 1452818_at   | 1421327_at | 0.9255 |
| PHF6    | MTAP2 | 1453761_at   | 1421327_at | 0.9622 |
| TAF2    | MTAP2 | 1457351_at   | 1421327_at | 0.9610 |
| ZNF69   | MTAP2 | 1458274_at   | 1421327_at | 0.8600 |
| ZIK1    | MTAP2 | 1421395_at   | 1421328_at | 0.9275 |
| NPAS3   | MTAP2 | 1421567_at   | 1421328_at | 0.9063 |
| SF1     | MTAP2 | 1422321_a_at | 1421328_at | 0.8971 |
| HMGA2   | MTAP2 | 1422851_at   | 1421328_at | 0.8506 |
| SUV39H2 | MTAP2 | 1422979_at   | 1421328_at | 0.9182 |
| RAD51C  | MTAP2 | 1423026_at   | 1421328_at | 0.9374 |
| SMARCC1 | MTAP2 | 1423417_at   | 1421328_at | 0.8879 |
| HIP1    | MTAP2 | 1424756_at   | 1421328_at | 0.9336 |
| PSRC1   | MTAP2 | 1425416_s_at | 1421328_at | 0.9351 |
| CAND1   | MTAP2 | 1428649_at   | 1421328_at | 0.9097 |
| ZNF157  | MTAP2 | 1428887_at   | 1421328_at | 0.9077 |
| MCM8    | MTAP2 | 1429557_at   | 1421328_at | 0.8079 |
| HELLS   | MTAP2 | 1430139_at   | 1421328_at | 0.8733 |
| TLE4    | MTAP2 | 1430384_at   | 1421328_at | 0.8648 |
| TGIF2   | MTAP2 | 1431115_at   | 1421328_at | 0.8492 |
| ERCC4   | MTAP2 | 1432272_a_at | 1421328_at | 0.9297 |
| SUV39H2 | MTAP2 | 1433996_at   | 1421328_at | 0.8899 |

|         |            |              |              |        |
|---------|------------|--------------|--------------|--------|
| SOX3    | MTAP2      | 1435192_at   | 1421328_at   | 0.8230 |
| PIF1    | MTAP2      | 1436738_at   | 1421328_at   | 0.8294 |
| SOX11   | MTAP2      | 1436790_a_at | 1421328_at   | 0.8787 |
| ASCL1   | MTAP2      | 1437086_at   | 1421328_at   | 0.8792 |
| RAD51C  | MTAP2      | 1438453_at   | 1421328_at   | 0.8599 |
| NKRF    | MTAP2      | 1441325_at   | 1421328_at   | 0.9204 |
| TAF1D   | MTAP2      | 1442289_at   | 1421328_at   | 0.8047 |
| FOXMI   | MTAP2      | 1448834_at   | 1421328_at   | 0.8931 |
| SOX4    | MTAP2      | 1449370_at   | 1421328_at   | 0.8636 |
| SUPT16H | MTAP2      | 1449578_at   | 1421328_at   | 0.9022 |
| TCERG1  | MTAP2      | 1450100_a_at | 1421328_at   | 0.9242 |
| ASCL1   | MTAP2      | 1450164_at   | 1421328_at   | 0.9236 |
| NPAS3   | MTAP2      | 1450287_at   | 1421328_at   | 0.8635 |
| ZFP354C | MTAP2      | 1450321_at   | 1421328_at   | 0.8915 |
| MYBL1   | MTAP2      | 1450481_at   | 1421328_at   | 0.8657 |
| SOX3    | MTAP2      | 1450485_at   | 1421328_at   | 0.9085 |
| HMGA2   | MTAP2      | 1450780_s_at | 1421328_at   | 0.8458 |
| ZNF451  | MTAP2      | 1451816_at   | 1421328_at   | 0.8362 |
| NCOR2   | MTAP2      | 1451841_a_at | 1421328_at   | 0.9156 |
| ZFP2    | MTAP2      | 1452025_a_at | 1421328_at   | 0.8846 |
| CENPF   | MTAP2      | 1452334_at   | 1421328_at   | 0.8883 |
| MLF1IP  | MTAP2      | 1452816_at   | 1421328_at   | 0.8219 |
| TTF2    | MTAP2      | 1452818_at   | 1421328_at   | 0.8759 |
| PHF6    | MTAP2      | 1453761_at   | 1421328_at   | 0.9212 |
| TAF2    | MTAP2      | 1457351_at   | 1421328_at   | 0.9178 |
| ZNF69   | MTAP2      | 1458274_at   | 1421328_at   | 0.8174 |
| ZIK1    | LRP8       | 1421395_at   | 1421459_a_at | 0.9654 |
| ZIK1    | SORCS1     | 1421395_at   | 1421509_at   | 0.8435 |
| ZIK1    | NPAS3      | 1421395_at   | 1421567_at   | 0.9212 |
| ZIK1    | CRKL       | 1421395_at   | 1421953_at   | 0.9616 |
| ZIK1    | NPTX1      | 1421395_at   | 1422130_at   | 0.8608 |
| ZIK1    | CDC25C     | 1421395_at   | 1422252_a_at | 0.9109 |
| ZIK1    | SF1        | 1421395_at   | 1422321_a_at | 0.9170 |
| ZIK1    | RAB23      | 1421395_at   | 1422399_a_at | 0.9769 |
| ZIK1    | ILF3       | 1421395_at   | 1422546_at   | 0.8439 |
| ZIK1    | HMGA2      | 1421395_at   | 1422851_at   | 0.9333 |
| ZIK1    | SUV39H2    | 1421395_at   | 1422979_at   | 0.9681 |
| ZIK1    | RAD51C     | 1421395_at   | 1423026_at   | 0.9927 |
| ZIK1    | INCENP     | 1421395_at   | 1423093_at   | 0.9641 |
| ZIK1    | RAD18      | 1421395_at   | 1423318_at   | 0.9054 |
| ZIK1    | SMARCC1    | 1421395_at   | 1423417_at   | 0.9398 |
| ZIK1    | D2ERTD750E | 1421395_at   | 1423464_at   | 0.9653 |
| ZIK1    | SEPT2      | 1421395_at   | 1423473_at   | 0.9421 |
| ZIK1    | MASTL      | 1421395_at   | 1423524_at   | 0.9948 |
| ZIK1    | MASTL      | 1421395_at   | 1423525_at   | 0.9703 |
| ZIK1    | KCNC1      | 1421395_at   | 1423559_at   | 0.8576 |
| ZIK1    | TMEM48     | 1421395_at   | 1424173_at   | 0.9769 |
| ZIK1    | CAMKK2     | 1421395_at   | 1424476_at   | 0.8496 |
| ZIK1    | HIP1       | 1421395_at   | 1424756_at   | 0.9785 |
| ZIK1    | WDR62      | 1421395_at   | 1424849_at   | 0.9425 |
| ZIK1    | ATP6V0A1   | 1421395_at   | 1425227_a_at | 0.8305 |

|      |               |            |              |        |
|------|---------------|------------|--------------|--------|
| ZIK1 | HUS1          | 1421395_at | 1425366_a_at | 0.9517 |
| ZIK1 | PSRC1         | 1421395_at | 1425416_s_at | 0.9575 |
| ZIK1 | CD109         | 1421395_at | 1425658_at   | 0.9861 |
| ZIK1 | CCDC77        | 1421395_at | 1425734_a_at | 0.9563 |
| ZIK1 | FANCI         | 1421395_at | 1425941_a_at | 0.9830 |
| ZIK1 | CDC7          | 1421395_at | 1426021_a_at | 0.9756 |
| ZIK1 | PVT1          | 1421395_at | 1427140_at   | 0.8751 |
| ZIK1 | RG9MTD2       | 1421395_at | 1427375_at   | 0.9489 |
| ZIK1 | FANCI         | 1421395_at | 1427953_at   | 0.9771 |
| ZIK1 | SRGAP2        | 1421395_at | 1427967_at   | 0.9641 |
| ZIK1 | CAND1         | 1421395_at | 1428649_at   | 0.9571 |
| ZIK1 | ZNF157        | 1421395_at | 1428887_at   | 0.9045 |
| ZIK1 | RASL11A       | 1421395_at | 1429444_at   | 0.8226 |
| ZIK1 | SPDYA         | 1421395_at | 1429470_at   | 0.8262 |
| ZIK1 | MCM8          | 1421395_at | 1429557_at   | 0.9126 |
| ZIK1 | SMC2          | 1421395_at | 1429659_at   | 0.9785 |
| ZIK1 | 6230416J20RIK | 1421395_at | 1429665_at   | 0.9125 |
| ZIK1 | 4632434I11RIK | 1421395_at | 1429734_at   | 0.9639 |
| ZIK1 | HELLS         | 1421395_at | 1430139_at   | 0.9219 |
| ZIK1 | CEP70         | 1421395_at | 1430231_a_at | 0.9806 |
| ZIK1 | NUP205        | 1421395_at | 1430343_at   | 0.9553 |
| ZIK1 | NCAPD3        | 1421395_at | 1430782_at   | 0.9275 |
| ZIK1 | TGIF2         | 1421395_at | 1431115_at   | 0.9009 |
| ZIK1 | PGAP1         | 1421395_at | 1431169_at   | 0.9510 |
| ZIK1 | DLG5          | 1421395_at | 1431187_s_at | 0.9258 |
| ZIK1 | PVT1          | 1421395_at | 1431352_s_at | 0.8910 |
| ZIK1 | JAM2          | 1421395_at | 1431416_a_at | 0.8387 |
| ZIK1 | 4933432K03RIK | 1421395_at | 1431489_at   | 0.8912 |
| ZIK1 | 2610021K21RIK | 1421395_at | 1431667_s_at | 0.9539 |
| ZIK1 | RAB31         | 1421395_at | 1431691_a_at | 0.8878 |
| ZIK1 | PIGN          | 1421395_at | 1432115_a_at | 0.9891 |
| ZIK1 | ERCC4         | 1421395_at | 1432272_a_at | 0.9676 |
| ZIK1 | MIPOL1        | 1421395_at | 1432284_at   | 0.8271 |
| ZIK1 | ARMC9         | 1421395_at | 1432383_a_at | 0.9522 |
| ZIK1 | 1700106N22RIK | 1421395_at | 1432504_at   | 0.9175 |
| ZIK1 | SUV39H2       | 1421395_at | 1433996_at   | 0.9432 |
| ZIK1 | NPHP4         | 1421395_at | 1434024_at   | 0.9351 |
| ZIK1 | SRGAP2        | 1421395_at | 1434407_at   | 0.8974 |
| ZIK1 | EXOD1         | 1421395_at | 1435390_at   | 0.8707 |
| ZIK1 | GEMIN5        | 1421395_at | 1436311_at   | 0.8269 |
| ZIK1 | CD109         | 1421395_at | 1436346_at   | 0.9739 |
| ZIK1 | CEP78         | 1421395_at | 1436352_at   | 0.8755 |
| ZIK1 | ZBTB12        | 1421395_at | 1436382_at   | 0.9517 |
| ZIK1 | SDC3          | 1421395_at | 1436482_a_at | 0.8077 |
| ZIK1 | PPP1R14B      | 1421395_at | 1436716_at   | 0.8204 |
| ZIK1 | PIF1          | 1421395_at | 1436738_at   | 0.9076 |
| ZIK1 | SOX11         | 1421395_at | 1436790_a_at | 0.8941 |
| ZIK1 | ASCL1         | 1421395_at | 1437086_at   | 0.8533 |
| ZIK1 | 2810408I11RIK | 1421395_at | 1437549_at   | 0.9790 |
| ZIK1 | AV164956      | 1421395_at | 1437673_at   | 0.9227 |
| ZIK1 | HEATR1        | 1421395_at | 1437965_at   | 0.8016 |

|      |               |            |              |        |
|------|---------------|------------|--------------|--------|
| ZIK1 | HEATR5B       | 1421395_at | 1438085_at   | 0.9302 |
| ZIK1 | 4933432K03RIK | 1421395_at | 1438356_x_at | 0.9869 |
| ZIK1 | RAD51C        | 1421395_at | 1438453_at   | 0.9339 |
| ZIK1 | DHX33         | 1421395_at | 1438765_at   | 0.9793 |
| ZIK1 | AH11          | 1421395_at | 1439083_at   | 0.8912 |
| ZIK1 | FANCD2        | 1421395_at | 1439091_at   | 0.9422 |
| ZIK1 | A1506816      | 1421395_at | 1439483_at   | 0.9623 |
| ZIK1 | A1746468      | 1421395_at | 1439960_at   | 0.9669 |
| ZIK1 | ABCC12        | 1421395_at | 1439985_at   | 0.8845 |
| ZIK1 | A930024E05RIK | 1421395_at | 1440206_at   | 0.9551 |
| ZIK1 | WDR35         | 1421395_at | 1440318_at   | 0.8202 |
| ZIK1 | SPRY4         | 1421395_at | 1440867_at   | 0.8011 |
| ZIK1 | KIF20B        | 1421395_at | 1440924_at   | 0.9607 |
| ZIK1 | A430071A18RIK | 1421395_at | 1441113_at   | 0.8511 |
| ZIK1 | MATR3         | 1421395_at | 1441272_at   | 0.9573 |
| ZIK1 | KBTBD8        | 1421395_at | 1441275_at   | 0.9859 |
| ZIK1 | NKRF          | 1421395_at | 1441325_at   | 0.9819 |
| ZIK1 | AU043080      | 1421395_at | 1441375_at   | 0.9704 |
| ZIK1 | ASPM          | 1421395_at | 1441520_at   | 0.9137 |
| ZIK1 | D2ERTD750E    | 1421395_at | 1442280_at   | 0.8713 |
| ZIK1 | TAF1D         | 1421395_at | 1442289_at   | 0.9013 |
| ZIK1 | NUP188        | 1421395_at | 1442314_at   | 0.8757 |
| ZIK1 | TTK           | 1421395_at | 1442594_at   | 0.9895 |
| ZIK1 | AW545941      | 1421395_at | 1443007_at   | 0.8731 |
| ZIK1 | BB337104      | 1421395_at | 1443026_at   | 0.8605 |
| ZIK1 | BB444561      | 1421395_at | 1443171_at   | 0.9712 |
| ZIK1 | BB130444      | 1421395_at | 1443410_at   | 0.8591 |
| ZIK1 | BM202761      | 1421395_at | 1443800_at   | 0.8877 |
| ZIK1 | ZBTB39        | 1421395_at | 1443880_at   | 0.9263 |
| ZIK1 | CDK5RAP2      | 1421395_at | 1443976_at   | 0.8728 |
| ZIK1 | ERCC6L        | 1421395_at | 1444024_at   | 0.9939 |
| ZIK1 | AV228095      | 1421395_at | 1444443_at   | 0.9827 |
| ZIK1 | 6530418L21RIK | 1421395_at | 1444723_at   | 0.9204 |
| ZIK1 | MASTL         | 1421395_at | 1444725_at   | 0.9349 |
| ZIK1 | BC023969      | 1421395_at | 1445226_at   | 0.9699 |
| ZIK1 | C530044C16RIK | 1421395_at | 1445247_at   | 0.8650 |
| ZIK1 | AV323315      | 1421395_at | 1445298_at   | 0.9133 |
| ZIK1 | KCND3         | 1421395_at | 1447513_at   | 0.9854 |
| ZIK1 | SEMA6D        | 1421395_at | 1448060_at   | 0.8990 |
| ZIK1 | OGG1          | 1421395_at | 1448815_at   | 0.9517 |
| ZIK1 | FOXM1         | 1421395_at | 1448834_at   | 0.9367 |
| ZIK1 | SKP2          | 1421395_at | 1449293_a_at | 0.9937 |
| ZIK1 | SOX4          | 1421395_at | 1449370_at   | 0.8480 |
| ZIK1 | SUPT16H       | 1421395_at | 1449578_at   | 0.9463 |
| ZIK1 | CCNB1         | 1421395_at | 1449675_at   | 0.9926 |
| ZIK1 | LFNG          | 1421395_at | 1449943_at   | 0.8615 |
| ZIK1 | APC           | 1421395_at | 1450056_at   | 0.8737 |
| ZIK1 | 4933411K20RIK | 1421395_at | 1450076_at   | 0.9912 |
| ZIK1 | TCERG1        | 1421395_at | 1450100_a_at | 0.9874 |
| ZIK1 | ASCL1         | 1421395_at | 1450164_at   | 0.9521 |
| ZIK1 | ZFP354C       | 1421395_at | 1450321_at   | 0.8989 |

|      |                |            |                |        |
|------|----------------|------------|----------------|--------|
| ZIK1 | SHC3           | 1421395_at | 1450326_at     | 0.8384 |
| ZIK1 | MED1           | 1421395_at | 1450402_at     | 0.8365 |
| ZIK1 | MYBL1          | 1421395_at | 1450481_at     | 0.9599 |
| ZIK1 | SOX3           | 1421395_at | 1450485_at     | 0.9497 |
| ZIK1 | SALL1          | 1421395_at | 1450489_at     | 0.8434 |
| ZIK1 | HMGA2          | 1421395_at | 1450780_s_at   | 0.9340 |
| ZIK1 | HMGA2          | 1421395_at | 1450781_at     | 0.8410 |
| ZIK1 | ZNF451         | 1421395_at | 1451816_at     | 0.9302 |
| ZIK1 | NCOR2          | 1421395_at | 1451841_a_at   | 0.9250 |
| ZIK1 | LMNB2          | 1421395_at | 1451849_a_at   | 0.8882 |
| ZIK1 | ZFP2           | 1421395_at | 1452025_a_at   | 0.9297 |
| ZIK1 | 6720460F02RIK  | 1421395_at | 1452073_at     | 0.9358 |
| ZIK1 | ZBED3          | 1421395_at | 1452088_at     | 0.8936 |
| ZIK1 | RRP1B          | 1421395_at | 1452119_at     | 0.9318 |
| ZIK1 | NOVA1          | 1421395_at | 1452245_at     | 0.8588 |
| ZIK1 | PVT1           | 1421395_at | 1452324_at     | 0.8214 |
| ZIK1 | CENPF          | 1421395_at | 1452334_at     | 0.9210 |
| ZIK1 | ADAMTS7        | 1421395_at | 1452339_at     | 0.8072 |
| ZIK1 | ASPM           | 1421395_at | 1452459_at     | 0.9651 |
| ZIK1 | AAK1           | 1421395_at | 1452632_at     | 0.8131 |
| ZIK1 | MLF1IP         | 1421395_at | 1452816_at     | 0.9138 |
| ZIK1 | TTF2           | 1421395_at | 1452818_at     | 0.9547 |
| ZIK1 | TMEM138        | 1421395_at | 1452978_at     | 0.9062 |
| ZIK1 | RHOBTB3        | 1421395_at | 1453227_at     | 0.9804 |
| ZIK1 | CALR3          | 1421395_at | 1453232_at     | 0.8050 |
| ZIK1 | HELLS          | 1421395_at | 1453361_at     | 0.8556 |
| ZIK1 | TROAP          | 1421395_at | 1453370_at     | 0.9796 |
| ZIK1 | CEP55          | 1421395_at | 1453683_a_at   | 0.9899 |
| ZIK1 | DHX38          | 1421395_at | 1453751_at     | 0.9584 |
| ZIK1 | PHF6           | 1421395_at | 1453761_at     | 0.9912 |
| ZIK1 | FAM110A        | 1421395_at | 1453768_a_at   | 0.8584 |
| ZIK1 | NETO2          | 1421395_at | 1454032_at     | 0.9039 |
| ZIK1 | CCDC77         | 1421395_at | 1454228_a_at   | 0.9559 |
| ZIK1 | EXOD1          | 1421395_at | 1454229_a_at   | 0.9921 |
| ZIK1 | XKR5           | 1421395_at | 1455127_at     | 0.8128 |
| ZIK1 | UTP23          | 1421395_at | 1455259_a_at   | 0.9833 |
| ZIK1 | ATP5G2         | 1421395_at | 1456128_at     | 0.8128 |
| ZIK1 | 2700049P18RIK  | 1421395_at | 1456163_at     | 0.9606 |
| ZIK1 | RTEL1          | 1421395_at | 1456729_x_at   | 0.8927 |
| ZIK1 | BB053540       | 1421395_at | 1456840_at     | 0.8498 |
| ZIK1 | AV254764       | 1421395_at | 1456951_at     | 0.9115 |
| ZIK1 | NETO2          | 1421395_at | 1457344_at     | 0.8103 |
| ZIK1 | TAF2           | 1421395_at | 1457351_at     | 0.9873 |
| ZIK1 | ZNF69          | 1421395_at | 1458274_at     | 0.9095 |
| ZIK1 | MTR            | 1421395_at | 1458532_at     | 0.8937 |
| ZIK1 | RNF219         | 1421395_at | 1458636_at     | 0.9807 |
| ZIK1 | BB463474       | 1421395_at | 1458902_at     | 0.8725 |
| ZIK1 | 6530418L21RIK  | 1421395_at | 1459051_at     | 0.8456 |
| ZIK1 | BB527979       | 1421395_at | 1459950_at     | 0.8076 |
| ZIK1 | AA763515       | 1421395_at | 1460065_at     | 0.8136 |
| ZIK1 | AFFX-DapX-5_at | 1421395_at | AFFX-DapX-5_at | 0.9002 |



|         |                       |            |                       |        |
|---------|-----------------------|------------|-----------------------|--------|
| ZIK1    | AFFX-LysX-5_at        | 1421395_at | AFFX-LysX-5_at        | 0.8745 |
| ZIK1    | AFFX-r2-Bs-dap-5_at   | 1421395_at | AFFX-r2-Bs-dap-5_at   | 0.8888 |
| ZIK1    | AFFX-r2-Bs-lys-5_at   | 1421395_at | AFFX-r2-Bs-lys-5_at   | 0.8983 |
| ZIK1    | AFFX-r2-Bs-thr-5_s_at | 1421395_at | AFFX-r2-Bs-thr-5_s_at | 0.8737 |
| ZIK1    | AFFX-ThrX-5_at        | 1421395_at | AFFX-ThrX-5_at        | 0.8781 |
| RAD51L1 | SORCS1                | 1421430_at | 1421509_at            | 0.8426 |
| RAD51L1 | CBX5                  | 1421430_at | 1421933_at            | 0.8420 |
| RAD51L1 | HMGA2                 | 1421430_at | 1422851_at            | 0.8482 |
| RAD51L1 | INCENP                | 1421430_at | 1423093_at            | 0.8410 |
| RAD51L1 | RAD18                 | 1421430_at | 1423318_at            | 0.9247 |
| RAD51L1 | CAMKK2                | 1421430_at | 1424476_at            | 0.9173 |
| RAD51L1 | PEG10                 | 1421430_at | 1427550_at            | 0.9510 |
| RAD51L1 | SPDYA                 | 1421430_at | 1429470_at            | 0.8379 |
| RAD51L1 | MCM8                  | 1421430_at | 1429557_at            | 0.8134 |
| RAD51L1 | RCBTB2                | 1421430_at | 1431017_at            | 0.9050 |
| RAD51L1 | MPHOSPH9              | 1421430_at | 1431053_at            | 0.8255 |
| RAD51L1 | MATR3                 | 1421430_at | 1431235_at            | 0.9603 |
| RAD51L1 | 4933432K03RIK         | 1421430_at | 1431489_at            | 0.8707 |
| RAD51L1 | PPIH                  | 1421430_at | 1431505_at            | 0.9008 |
| RAD51L1 | MIPOL1                | 1421430_at | 1432284_at            | 0.9439 |
| RAD51L1 | THG1L                 | 1421430_at | 1432393_a_at          | 0.9325 |
| RAD51L1 | TROAP                 | 1421430_at | 1433790_at            | 0.8221 |
| RAD51L1 | GEMIN5                | 1421430_at | 1436311_at            | 0.8543 |
| RAD51L1 | ZBTB12                | 1421430_at | 1436382_at            | 0.8855 |
| RAD51L1 | PPP1R14B              | 1421430_at | 1436716_at            | 0.9237 |
| RAD51L1 | PIF1                  | 1421430_at | 1436738_at            | 0.8597 |
| RAD51L1 | 2810408I11RIK         | 1421430_at | 1437549_at            | 0.8478 |
| RAD51L1 | PIGT                  | 1421430_at | 1437594_x_at          | 0.9047 |
| RAD51L1 | KIF20B                | 1421430_at | 1440924_at            | 0.8451 |
| RAD51L1 | A430071A18RIK         | 1421430_at | 1441113_at            | 0.8493 |
| RAD51L1 | MATR3                 | 1421430_at | 1441272_at            | 0.8938 |
| RAD51L1 | KBTBD8                | 1421430_at | 1441275_at            | 0.8104 |
| RAD51L1 | CCDC38                | 1421430_at | 1441965_at            | 0.9067 |
| RAD51L1 | TAF1D                 | 1421430_at | 1442289_at            | 0.9093 |
| RAD51L1 | BM202761              | 1421430_at | 1443800_at            | 0.9149 |
| RAD51L1 | AV228095              | 1421430_at | 1444443_at            | 0.8091 |
| RAD51L1 | C530044C16RIK         | 1421430_at | 1445247_at            | 0.8141 |
| RAD51L1 | 9330118A15RIK         | 1421430_at | 1446612_at            | 0.8731 |
| RAD51L1 | BE953578              | 1421430_at | 1447298_at            | 0.8731 |
| RAD51L1 | OGG1                  | 1421430_at | 1448815_at            | 0.8010 |
| RAD51L1 | MED1                  | 1421430_at | 1450402_at            | 0.9182 |
| RAD51L1 | MYBL1                 | 1421430_at | 1450481_at            | 0.8799 |
| RAD51L1 | SALL1                 | 1421430_at | 1450489_at            | 0.8293 |
| RAD51L1 | HMGA2                 | 1421430_at | 1450780_s_at          | 0.8701 |
| RAD51L1 | HMGA2                 | 1421430_at | 1450781_at            | 0.9160 |
| RAD51L1 | ZNF451                | 1421430_at | 1451816_at            | 0.9049 |
| RAD51L1 | ZBED3                 | 1421430_at | 1452088_at            | 0.9139 |
| RAD51L1 | MLF1IP                | 1421430_at | 1452816_at            | 0.8772 |
| RAD51L1 | TTF2                  | 1421430_at | 1452818_at            | 0.8045 |
| RAD51L1 | HELLS                 | 1421430_at | 1453361_at            | 0.8665 |
| RAD51L1 | CEP55                 | 1421430_at | 1453683_a_at          | 0.8012 |

|         |          |              |              |        |
|---------|----------|--------------|--------------|--------|
| RAD51L1 | CCDC77   | 1421430_at   | 1454228_a_at | 0.8525 |
| RAD51L1 | DTL      | 1421430_at   | 1456652_at   | 0.8025 |
| RAD51L1 | RTEL1    | 1421430_at   | 1456729_x_at | 0.8208 |
| RAD51L1 | AV254764 | 1421430_at   | 1456951_at   | 0.8189 |
| RAD51L1 | ETAA1    | 1421430_at   | 1457882_at   | 0.9341 |
| RAD51L1 | MTR      | 1421430_at   | 1458532_at   | 0.8224 |
| RAD51L1 | BB463474 | 1421430_at   | 1458902_at   | 0.9175 |
| RAD51L1 | AA763515 | 1421430_at   | 1460065_at   | 0.9416 |
| NPAS3   | LRP8     | 1421567_at   | 1421459_a_at | 0.8781 |
| SF1     | LRP8     | 1422321_a_at | 1421459_a_at | 0.8776 |
| ILF3    | LRP8     | 1422546_at   | 1421459_a_at | 0.8142 |
| HMGA2   | LRP8     | 1422851_at   | 1421459_a_at | 0.8962 |
| SUV39H2 | LRP8     | 1422979_at   | 1421459_a_at | 0.9305 |
| RAD51C  | LRP8     | 1423026_at   | 1421459_a_at | 0.9570 |
| RAD18   | LRP8     | 1423318_at   | 1421459_a_at | 0.8973 |
| SMARCC1 | LRP8     | 1423417_at   | 1421459_a_at | 0.9361 |
| HIP1    | LRP8     | 1424756_at   | 1421459_a_at | 0.9592 |
| PSRC1   | LRP8     | 1425416_s_at | 1421459_a_at | 0.8998 |
| CAND1   | LRP8     | 1428649_at   | 1421459_a_at | 0.9168 |
| ZNF157  | LRP8     | 1428887_at   | 1421459_a_at | 0.8482 |
| MCM8    | LRP8     | 1429557_at   | 1421459_a_at | 0.8924 |
| HELLS   | LRP8     | 1430139_at   | 1421459_a_at | 0.8766 |
| TGIF2   | LRP8     | 1431115_at   | 1421459_a_at | 0.8922 |
| ERCC4   | LRP8     | 1432272_a_at | 1421459_a_at | 0.9376 |
| SUV39H2 | LRP8     | 1433996_at   | 1421459_a_at | 0.9221 |
| PIF1    | LRP8     | 1436738_at   | 1421459_a_at | 0.8859 |
| SOX11   | LRP8     | 1436790_a_at | 1421459_a_at | 0.8229 |
| RAD51C  | LRP8     | 1438453_at   | 1421459_a_at | 0.8906 |
| NKRF    | LRP8     | 1441325_at   | 1421459_a_at | 0.9775 |
| TAF1D   | LRP8     | 1442289_at   | 1421459_a_at | 0.8946 |
| FOXM1   | LRP8     | 1448834_at   | 1421459_a_at | 0.8992 |
| SUPT16H | LRP8     | 1449578_at   | 1421459_a_at | 0.9181 |
| TCERG1  | LRP8     | 1450100_a_at | 1421459_a_at | 0.9670 |
| ASCL1   | LRP8     | 1450164_at   | 1421459_a_at | 0.9018 |
| ZFP354C | LRP8     | 1450321_at   | 1421459_a_at | 0.8817 |
| MED1    | LRP8     | 1450402_at   | 1421459_a_at | 0.8665 |
| MYBL1   | LRP8     | 1450481_at   | 1421459_a_at | 0.9516 |
| SOX3    | LRP8     | 1450485_at   | 1421459_a_at | 0.9379 |
| SALL1   | LRP8     | 1450489_at   | 1421459_a_at | 0.8260 |
| HMGA2   | LRP8     | 1450780_s_at | 1421459_a_at | 0.9117 |
| HMGA2   | LRP8     | 1450781_at   | 1421459_a_at | 0.8325 |
| ZNF451  | LRP8     | 1451816_at   | 1421459_a_at | 0.9306 |
| NCOR2   | LRP8     | 1451841_a_at | 1421459_a_at | 0.8840 |
| ZFP2    | LRP8     | 1452025_a_at | 1421459_a_at | 0.8792 |
| ZBED3   | LRP8     | 1452088_at   | 1421459_a_at | 0.8968 |
| CENPF   | LRP8     | 1452334_at   | 1421459_a_at | 0.8765 |
| MLF1IP  | LRP8     | 1452816_at   | 1421459_a_at | 0.9318 |
| TTF2    | LRP8     | 1452818_at   | 1421459_a_at | 0.9527 |
| HELLS   | LRP8     | 1453361_at   | 1421459_a_at | 0.8741 |
| PHF6    | LRP8     | 1453761_at   | 1421459_a_at | 0.9543 |
| TAF2    | LRP8     | 1457351_at   | 1421459_a_at | 0.9785 |

|         |            |              |              |        |
|---------|------------|--------------|--------------|--------|
| ZNF69   | LRP8       | 1458274_at   | 1421459_a_at | 0.9278 |
| NPAS3   | SORCS1     | 1421567_at   | 1421509_at   | 0.8576 |
| SF1     | SORCS1     | 1422321_a_at | 1421509_at   | 0.8278 |
| HMGA2   | SORCS1     | 1422851_at   | 1421509_at   | 0.9235 |
| SUV39H2 | SORCS1     | 1422979_at   | 1421509_at   | 0.8232 |
| RAD51C  | SORCS1     | 1423026_at   | 1421509_at   | 0.8317 |
| RAD18   | SORCS1     | 1423318_at   | 1421509_at   | 0.9354 |
| SMARCC1 | SORCS1     | 1423417_at   | 1421509_at   | 0.8048 |
| HIP1    | SORCS1     | 1424756_at   | 1421509_at   | 0.8388 |
| PEG10   | SORCS1     | 1427550_at   | 1421509_at   | 0.8845 |
| CAND1   | SORCS1     | 1428649_at   | 1421509_at   | 0.8981 |
| MCM8    | SORCS1     | 1429557_at   | 1421509_at   | 0.8398 |
| TGIF2   | SORCS1     | 1431115_at   | 1421509_at   | 0.8391 |
| SUV39H2 | SORCS1     | 1433996_at   | 1421509_at   | 0.8045 |
| PIF1    | SORCS1     | 1436738_at   | 1421509_at   | 0.9185 |
| RAD51C  | SORCS1     | 1438453_at   | 1421509_at   | 0.8144 |
| NKRF    | SORCS1     | 1441325_at   | 1421509_at   | 0.8407 |
| TAF1D   | SORCS1     | 1442289_at   | 1421509_at   | 0.9282 |
| SUPT16H | SORCS1     | 1449578_at   | 1421509_at   | 0.8338 |
| TCERG1  | SORCS1     | 1450100_a_at | 1421509_at   | 0.8421 |
| MED1    | SORCS1     | 1450402_at   | 1421509_at   | 0.8360 |
| MYBL1   | SORCS1     | 1450481_at   | 1421509_at   | 0.9012 |
| SOX3    | SORCS1     | 1450485_at   | 1421509_at   | 0.8643 |
| SALL1   | SORCS1     | 1450489_at   | 1421509_at   | 0.8389 |
| HMGA2   | SORCS1     | 1450780_s_at | 1421509_at   | 0.9123 |
| HMGA2   | SORCS1     | 1450781_at   | 1421509_at   | 0.9634 |
| ZNF451  | SORCS1     | 1451816_at   | 1421509_at   | 0.9387 |
| ZBED3   | SORCS1     | 1452088_at   | 1421509_at   | 0.9314 |
| MLF1IP  | SORCS1     | 1452816_at   | 1421509_at   | 0.8640 |
| TTF2    | SORCS1     | 1452818_at   | 1421509_at   | 0.8806 |
| HELLS   | SORCS1     | 1453361_at   | 1421509_at   | 0.9199 |
| PHF6    | SORCS1     | 1453761_at   | 1421509_at   | 0.8866 |
| TAF2    | SORCS1     | 1457351_at   | 1421509_at   | 0.8375 |
| NPAS3   | CRKL       | 1421567_at   | 1421953_at   | 0.8995 |
| NPAS3   | NPTX1      | 1421567_at   | 1422130_at   | 0.8669 |
| NPAS3   | CDC25C     | 1421567_at   | 1422252_a_at | 0.8630 |
| NPAS3   | SF1        | 1421567_at   | 1422321_a_at | 0.9650 |
| NPAS3   | RAB23      | 1421567_at   | 1422399_a_at | 0.9580 |
| NPAS3   | ILF3       | 1421567_at   | 1422546_at   | 0.8197 |
| NPAS3   | HMGA2      | 1421567_at   | 1422851_at   | 0.8702 |
| NPAS3   | SUV39H2    | 1421567_at   | 1422979_at   | 0.9147 |
| NPAS3   | RAD51C     | 1421567_at   | 1423026_at   | 0.9465 |
| NPAS3   | INCENP     | 1421567_at   | 1423093_at   | 0.9015 |
| NPAS3   | RAD18      | 1421567_at   | 1423318_at   | 0.8072 |
| NPAS3   | SMARCC1    | 1421567_at   | 1423417_at   | 0.8877 |
| NPAS3   | D2ERTD750E | 1421567_at   | 1423464_at   | 0.9338 |
| NPAS3   | SEPT2      | 1421567_at   | 1423473_at   | 0.8771 |
| NPAS3   | MASTL      | 1421567_at   | 1423524_at   | 0.9169 |
| NPAS3   | MASTL      | 1421567_at   | 1423525_at   | 0.9154 |
| NPAS3   | KCNC1      | 1421567_at   | 1423559_at   | 0.8651 |
| NPAS3   | TMEM48     | 1421567_at   | 1424173_at   | 0.9518 |

|       |               |            |              |        |
|-------|---------------|------------|--------------|--------|
| NPAS3 | HIP1          | 1421567_at | 1424756_at   | 0.9503 |
| NPAS3 | WDR62         | 1421567_at | 1424849_at   | 0.8895 |
| NPAS3 | HUS1          | 1421567_at | 1425366_a_at | 0.8668 |
| NPAS3 | PSRC1         | 1421567_at | 1425416_s_at | 0.9653 |
| NPAS3 | CD109         | 1421567_at | 1425658_at   | 0.9591 |
| NPAS3 | CCDC77        | 1421567_at | 1425734_a_at | 0.9314 |
| NPAS3 | FANCI         | 1421567_at | 1425941_a_at | 0.8791 |
| NPAS3 | CDC7          | 1421567_at | 1426021_a_at | 0.9560 |
| NPAS3 | PVT1          | 1421567_at | 1427140_at   | 0.8888 |
| NPAS3 | RG9MTD2       | 1421567_at | 1427375_at   | 0.9159 |
| NPAS3 | FANCI         | 1421567_at | 1427953_at   | 0.8909 |
| NPAS3 | SRGAP2        | 1421567_at | 1427967_at   | 0.9584 |
| NPAS3 | CAND1         | 1421567_at | 1428649_at   | 0.9684 |
| NPAS3 | ZNF157        | 1421567_at | 1428887_at   | 0.9528 |
| NPAS3 | RASL11A       | 1421567_at | 1429444_at   | 0.8947 |
| NPAS3 | MCM8          | 1421567_at | 1429557_at   | 0.8416 |
| NPAS3 | SMC2          | 1421567_at | 1429659_at   | 0.8625 |
| NPAS3 | 6230416J20RIK | 1421567_at | 1429665_at   | 0.8945 |
| NPAS3 | 4632434I11RIK | 1421567_at | 1429734_at   | 0.9364 |
| NPAS3 | HELLS         | 1421567_at | 1430139_at   | 0.8529 |
| NPAS3 | CEP70         | 1421567_at | 1430231_a_at | 0.9400 |
| NPAS3 | NUP205        | 1421567_at | 1430343_at   | 0.8409 |
| NPAS3 | TLE4          | 1421567_at | 1430384_at   | 0.8294 |
| NPAS3 | NCAPD3        | 1421567_at | 1430782_at   | 0.8219 |
| NPAS3 | TGIF2         | 1421567_at | 1431115_at   | 0.8923 |
| NPAS3 | PGAP1         | 1421567_at | 1431169_at   | 0.8748 |
| NPAS3 | DLG5          | 1421567_at | 1431187_s_at | 0.8745 |
| NPAS3 | PVT1          | 1421567_at | 1431352_s_at | 0.8836 |
| NPAS3 | JAM2          | 1421567_at | 1431416_a_at | 0.8367 |
| NPAS3 | 4933432K03RIK | 1421567_at | 1431489_at   | 0.8668 |
| NPAS3 | 2610021K21RIK | 1421567_at | 1431667_s_at | 0.8378 |
| NPAS3 | RAB31         | 1421567_at | 1431691_a_at | 0.9162 |
| NPAS3 | PIGN          | 1421567_at | 1432115_a_at | 0.8974 |
| NPAS3 | ERCC4         | 1421567_at | 1432272_a_at | 0.9581 |
| NPAS3 | ARMC9         | 1421567_at | 1432383_a_at | 0.9594 |
| NPAS3 | 1700106N22RIK | 1421567_at | 1432504_at   | 0.9381 |
| NPAS3 | SUV39H2       | 1421567_at | 1433996_at   | 0.8409 |
| NPAS3 | NPHP4         | 1421567_at | 1434024_at   | 0.9273 |
| NPAS3 | SRGAP2        | 1421567_at | 1434407_at   | 0.8856 |
| NPAS3 | EXOD1         | 1421567_at | 1435390_at   | 0.8172 |
| NPAS3 | CD109         | 1421567_at | 1436346_at   | 0.9490 |
| NPAS3 | CEP78         | 1421567_at | 1436352_at   | 0.8045 |
| NPAS3 | ZBTB12        | 1421567_at | 1436382_at   | 0.8712 |
| NPAS3 | SDC3          | 1421567_at | 1436482_a_at | 0.8655 |
| NPAS3 | PIF1          | 1421567_at | 1436738_at   | 0.8455 |
| NPAS3 | SOX11         | 1421567_at | 1436790_a_at | 0.8568 |
| NPAS3 | 4922501L14RIK | 1421567_at | 1436969_at   | 0.8304 |
| NPAS3 | ASCL1         | 1421567_at | 1437086_at   | 0.8361 |
| NPAS3 | LRRC4B        | 1421567_at | 1437183_at   | 0.8258 |
| NPAS3 | 2810408I11RIK | 1421567_at | 1437549_at   | 0.8974 |
| NPAS3 | AV164956      | 1421567_at | 1437673_at   | 0.8964 |

|       |               |            |              |        |
|-------|---------------|------------|--------------|--------|
| NPAS3 | HEATR5B       | 1421567_at | 1438085_at   | 0.8556 |
| NPAS3 | 4933432K03RIK | 1421567_at | 1438356_x_at | 0.9118 |
| NPAS3 | RAD51C        | 1421567_at | 1438453_at   | 0.8475 |
| NPAS3 | DHX33         | 1421567_at | 1438765_at   | 0.9230 |
| NPAS3 | AH11          | 1421567_at | 1439083_at   | 0.8787 |
| NPAS3 | FANCD2        | 1421567_at | 1439091_at   | 0.8594 |
| NPAS3 | A1506816      | 1421567_at | 1439483_at   | 0.9572 |
| NPAS3 | A1746468      | 1421567_at | 1439960_at   | 0.9146 |
| NPAS3 | ABCC12        | 1421567_at | 1439985_at   | 0.8404 |
| NPAS3 | A930024E05RIK | 1421567_at | 1440206_at   | 0.9182 |
| NPAS3 | KIF20B        | 1421567_at | 1440924_at   | 0.8066 |
| NPAS3 | A430071A18RIK | 1421567_at | 1441113_at   | 0.8498 |
| NPAS3 | MATR3         | 1421567_at | 1441272_at   | 0.8264 |
| NPAS3 | KBTBD8        | 1421567_at | 1441275_at   | 0.9079 |
| NPAS3 | NKRF          | 1421567_at | 1441325_at   | 0.9255 |
| NPAS3 | AU043080      | 1421567_at | 1441375_at   | 0.8325 |
| NPAS3 | ASPM          | 1421567_at | 1441520_at   | 0.8323 |
| NPAS3 | D2ERTD750E    | 1421567_at | 1442280_at   | 0.8358 |
| NPAS3 | TAF1D         | 1421567_at | 1442289_at   | 0.8037 |
| NPAS3 | TTK           | 1421567_at | 1442594_at   | 0.9366 |
| NPAS3 | BB337104      | 1421567_at | 1443026_at   | 0.8616 |
| NPAS3 | BB444561      | 1421567_at | 1443171_at   | 0.9025 |
| NPAS3 | BB340127      | 1421567_at | 1443230_at   | 0.8386 |
| NPAS3 | BB130444      | 1421567_at | 1443410_at   | 0.8433 |
| NPAS3 | ZBTB39        | 1421567_at | 1443880_at   | 0.9418 |
| NPAS3 | CDK5RAP2      | 1421567_at | 1443976_at   | 0.8803 |
| NPAS3 | ERCC6L        | 1421567_at | 1444024_at   | 0.9383 |
| NPAS3 | AV228095      | 1421567_at | 1444443_at   | 0.8854 |
| NPAS3 | 6530418L21RIK | 1421567_at | 1444723_at   | 0.9455 |
| NPAS3 | BC023969      | 1421567_at | 1445226_at   | 0.9650 |
| NPAS3 | C530044C16RIK | 1421567_at | 1445247_at   | 0.8176 |
| NPAS3 | AV323315      | 1421567_at | 1445298_at   | 0.8521 |
| NPAS3 | KCND3         | 1421567_at | 1447513_at   | 0.9577 |
| NPAS3 | SEMA6D        | 1421567_at | 1448060_at   | 0.8928 |
| NPAS3 | OGG1          | 1421567_at | 1448815_at   | 0.8913 |
| NPAS3 | FOXM1         | 1421567_at | 1448834_at   | 0.9106 |
| NPAS3 | SKP2          | 1421567_at | 1449293_a_at | 0.9393 |
| NPAS3 | SOX4          | 1421567_at | 1449370_at   | 0.8315 |
| NPAS3 | SUPT16H       | 1421567_at | 1449578_at   | 0.9007 |
| NPAS3 | CCNB1         | 1421567_at | 1449675_at   | 0.9075 |
| NPAS3 | LFNG          | 1421567_at | 1449943_at   | 0.9375 |
| NPAS3 | APC           | 1421567_at | 1450056_at   | 0.8310 |
| NPAS3 | 4933411K20RIK | 1421567_at | 1450076_at   | 0.9193 |
| NPAS3 | TCERG1        | 1421567_at | 1450100_a_at | 0.9192 |
| NPAS3 | ASCL1         | 1421567_at | 1450164_at   | 0.9423 |
| NPAS3 | PCDHB11       | 1421567_at | 1450270_at   | 0.8462 |
| NPAS3 | ZFP354C       | 1421567_at | 1450321_at   | 0.9141 |
| NPAS3 | SHC3          | 1421567_at | 1450326_at   | 0.8627 |
| NPAS3 | MYBL1         | 1421567_at | 1450481_at   | 0.8494 |
| NPAS3 | SOX3          | 1421567_at | 1450485_at   | 0.9588 |
| NPAS3 | HMGA2         | 1421567_at | 1450780_s_at | 0.8483 |

|       |                       |            |                       |        |
|-------|-----------------------|------------|-----------------------|--------|
| NPAS3 | ZNF451                | 1421567_at | 1451816_at            | 0.8492 |
| NPAS3 | NCOR2                 | 1421567_at | 1451841_a_at          | 0.9850 |
| NPAS3 | LMNB2                 | 1421567_at | 1451849_a_at          | 0.9093 |
| NPAS3 | ZFP2                  | 1421567_at | 1452025_a_at          | 0.9323 |
| NPAS3 | 6720460F02RIK         | 1421567_at | 1452073_at            | 0.9043 |
| NPAS3 | ZBED3                 | 1421567_at | 1452088_at            | 0.8056 |
| NPAS3 | RRP1B                 | 1421567_at | 1452119_at            | 0.8698 |
| NPAS3 | NOVA1                 | 1421567_at | 1452245_at            | 0.8725 |
| NPAS3 | CENPF                 | 1421567_at | 1452334_at            | 0.8731 |
| NPAS3 | ADAMTS7               | 1421567_at | 1452339_at            | 0.8410 |
| NPAS3 | ASPM                  | 1421567_at | 1452459_at            | 0.9041 |
| NPAS3 | MLF1IP                | 1421567_at | 1452816_at            | 0.8010 |
| NPAS3 | TTF2                  | 1421567_at | 1452818_at            | 0.8921 |
| NPAS3 | TMEM138               | 1421567_at | 1452978_at            | 0.8315 |
| NPAS3 | RHOBTB3               | 1421567_at | 1453227_at            | 0.9624 |
| NPAS3 | CALR3                 | 1421567_at | 1453232_at            | 0.8719 |
| NPAS3 | TROAP                 | 1421567_at | 1453370_at            | 0.9233 |
| NPAS3 | CEP55                 | 1421567_at | 1453683_a_at          | 0.9297 |
| NPAS3 | DHX38                 | 1421567_at | 1453751_at            | 0.8898 |
| NPAS3 | PHF6                  | 1421567_at | 1453761_at            | 0.9367 |
| NPAS3 | FAM110A               | 1421567_at | 1453768_a_at          | 0.8743 |
| NPAS3 | NETO2                 | 1421567_at | 1454032_at            | 0.8642 |
| NPAS3 | CCDC77                | 1421567_at | 1454228_a_at          | 0.8844 |
| NPAS3 | EXOD1                 | 1421567_at | 1454229_a_at          | 0.9446 |
| NPAS3 | UTP23                 | 1421567_at | 1455259_a_at          | 0.8722 |
| NPAS3 | ATP5G2                | 1421567_at | 1456128_at            | 0.8401 |
| NPAS3 | 2700049P18RIK         | 1421567_at | 1456163_at            | 0.8889 |
| NPAS3 | BB053540              | 1421567_at | 1456840_at            | 0.8239 |
| NPAS3 | AV254764              | 1421567_at | 1456951_at            | 0.8287 |
| NPAS3 | TAF2                  | 1421567_at | 1457351_at            | 0.9116 |
| NPAS3 | ZNF69                 | 1421567_at | 1458274_at            | 0.8123 |
| NPAS3 | RNF219                | 1421567_at | 1458636_at            | 0.9487 |
| NPAS3 | 6530418L21RIK         | 1421567_at | 1459051_at            | 0.8876 |
| NPAS3 | AFFX-DapX-5_at        | 1421567_at | AFFX-DapX-5_at        | 0.8795 |
| NPAS3 | AFFX-r2-Bs-dap-5_at   | 1421567_at | AFFX-r2-Bs-dap-5_at   | 0.8738 |
| NPAS3 | AFFX-r2-Bs-lys-5_at   | 1421567_at | AFFX-r2-Bs-lys-5_at   | 0.8354 |
| NPAS3 | AFFX-r2-Bs-thr-5_s_at | 1421567_at | AFFX-r2-Bs-thr-5_s_at | 0.8518 |
| NPAS3 | AFFX-ThrX-5_at        | 1421567_at | AFFX-ThrX-5_at        | 0.8525 |
| CBX5  | RAD18                 | 1421933_at | 1423318_at            | 0.8342 |
| CBX5  | SMARCC1               | 1421933_at | 1423417_at            | 0.8010 |
| CBX5  | CAMKK2                | 1421933_at | 1424476_at            | 0.8350 |
| CBX5  | PEG10                 | 1421933_at | 1427550_at            | 0.8436 |
| CBX5  | RCBTB2                | 1421933_at | 1431017_at            | 0.8074 |
| CBX5  | MATR3                 | 1421933_at | 1431235_at            | 0.8434 |
| CBX5  | MIPOL1                | 1421933_at | 1432284_at            | 0.8327 |
| CBX5  | THG1L                 | 1421933_at | 1432393_a_at          | 0.8195 |
| CBX5  | SUV39H2               | 1421933_at | 1433996_at            | 0.8439 |
| CBX5  | GEMIN5                | 1421933_at | 1436311_at            | 0.8046 |
| CBX5  | ZBTB12                | 1421933_at | 1436382_at            | 0.8247 |
| CBX5  | 2810408I11RIK         | 1421933_at | 1437549_at            | 0.8002 |
| CBX5  | AHI1                  | 1421933_at | 1439083_at            | 0.8113 |

|         |               |              |            |        |
|---------|---------------|--------------|------------|--------|
| CBX5    | KIF20B        | 1421933_at   | 1440924_at | 0.8106 |
| CBX5    | MATR3         | 1421933_at   | 1441272_at | 0.8323 |
| CBX5    | TAF1D         | 1421933_at   | 1442289_at | 0.8026 |
| CBX5    | BM202761      | 1421933_at   | 1443800_at | 0.8092 |
| CBX5    | 9330118A15RIK | 1421933_at   | 1446612_at | 0.8460 |
| CBX5    | BE953578      | 1421933_at   | 1447298_at | 0.8042 |
| CBX5    | SUPT16H       | 1421933_at   | 1449578_at | 0.8246 |
| CBX5    | MED1          | 1421933_at   | 1450402_at | 0.8483 |
| CBX5    | MYBL1         | 1421933_at   | 1450481_at | 0.8218 |
| CBX5    | HMGA2         | 1421933_at   | 1450781_at | 0.8147 |
| CBX5    | ZNF451        | 1421933_at   | 1451816_at | 0.8335 |
| CBX5    | ZBED3         | 1421933_at   | 1452088_at | 0.8415 |
| CBX5    | MLF1IP        | 1421933_at   | 1452816_at | 0.8171 |
| CBX5    | ETAA1         | 1421933_at   | 1457882_at | 0.8311 |
| CBX5    | MTR           | 1421933_at   | 1458532_at | 0.8225 |
| CBX5    | BB463474      | 1421933_at   | 1458902_at | 0.8180 |
| CBX5    | AA763515      | 1421933_at   | 1460065_at | 0.8239 |
| SF1     | CRKL          | 1422321_a_at | 1421953_at | 0.8769 |
| ILF3    | CRKL          | 1422546_at   | 1421953_at | 0.8098 |
| HMGA2   | CRKL          | 1422851_at   | 1421953_at | 0.9069 |
| SUV39H2 | CRKL          | 1422979_at   | 1421953_at | 0.9233 |
| RAD51C  | CRKL          | 1423026_at   | 1421953_at | 0.9582 |
| RAD18   | CRKL          | 1423318_at   | 1421953_at | 0.8962 |
| SMARCC1 | CRKL          | 1423417_at   | 1421953_at | 0.9367 |
| HIP1    | CRKL          | 1424756_at   | 1421953_at | 0.9506 |
| PSRC1   | CRKL          | 1425416_s_at | 1421953_at | 0.9117 |
| CAND1   | CRKL          | 1428649_at   | 1421953_at | 0.9240 |
| ZNF157  | CRKL          | 1428887_at   | 1421953_at | 0.8655 |
| MCM8    | CRKL          | 1429557_at   | 1421953_at | 0.9123 |
| HELLS   | CRKL          | 1430139_at   | 1421953_at | 0.8748 |
| TGIF2   | CRKL          | 1431115_at   | 1421953_at | 0.8772 |
| ERCC4   | CRKL          | 1432272_a_at | 1421953_at | 0.9313 |
| SUV39H2 | CRKL          | 1433996_at   | 1421953_at | 0.9058 |
| PIF1    | CRKL          | 1436738_at   | 1421953_at | 0.8893 |
| SOX11   | CRKL          | 1436790_a_at | 1421953_at | 0.8157 |
| RAD51C  | CRKL          | 1438453_at   | 1421953_at | 0.8996 |
| NKRF    | CRKL          | 1441325_at   | 1421953_at | 0.9576 |
| TAF1D   | CRKL          | 1442289_at   | 1421953_at | 0.9188 |
| FOXO1   | CRKL          | 1448834_at   | 1421953_at | 0.8950 |
| SUPT16H | CRKL          | 1449578_at   | 1421953_at | 0.9221 |
| TCERG1  | CRKL          | 1450100_a_at | 1421953_at | 0.9633 |
| ASCL1   | CRKL          | 1450164_at   | 1421953_at | 0.9106 |
| ZFP354C | CRKL          | 1450321_at   | 1421953_at | 0.8697 |
| MED1    | CRKL          | 1450402_at   | 1421953_at | 0.8536 |
| MYBL1   | CRKL          | 1450481_at   | 1421953_at | 0.9460 |
| SOX3    | CRKL          | 1450485_at   | 1421953_at | 0.9369 |
| SALL1   | CRKL          | 1450489_at   | 1421953_at | 0.8756 |
| HMGA2   | CRKL          | 1450780_s_at | 1421953_at | 0.9163 |
| HMGA2   | CRKL          | 1450781_at   | 1421953_at | 0.8506 |
| ZNF451  | CRKL          | 1451816_at   | 1421953_at | 0.9240 |
| NCOR2   | CRKL          | 1451841_a_at | 1421953_at | 0.8953 |

|         |               |              |              |        |
|---------|---------------|--------------|--------------|--------|
| ZFP2    | CRKL          | 1452025_at   | 1421953_at   | 0.9178 |
| ZBED3   | CRKL          | 1452088_at   | 1421953_at   | 0.8906 |
| CENPF   | CRKL          | 1452334_at   | 1421953_at   | 0.8848 |
| MLF1IP  | CRKL          | 1452816_at   | 1421953_at   | 0.8931 |
| TTF2    | CRKL          | 1452818_at   | 1421953_at   | 0.9428 |
| HELLS   | CRKL          | 1453361_at   | 1421953_at   | 0.8600 |
| PHF6    | CRKL          | 1453761_at   | 1421953_at   | 0.9574 |
| TAF2    | CRKL          | 1457351_at   | 1421953_at   | 0.9567 |
| ZNF69   | CRKL          | 1458274_at   | 1421953_at   | 0.8919 |
| TEAD2   | NOTCH3        | 1448519_at   | 1421964_at   | 0.8103 |
| SF1     | NPTX1         | 1422321_a_at | 1422130_at   | 0.8374 |
| SUV39H2 | NPTX1         | 1422979_at   | 1422130_at   | 0.8542 |
| RAD51C  | NPTX1         | 1423026_at   | 1422130_at   | 0.8663 |
| SMARCC1 | NPTX1         | 1423417_at   | 1422130_at   | 0.8255 |
| HIP1    | NPTX1         | 1424756_at   | 1422130_at   | 0.8487 |
| PSRC1   | NPTX1         | 1425416_s_at | 1422130_at   | 0.8679 |
| CAND1   | NPTX1         | 1428649_at   | 1422130_at   | 0.9020 |
| ZNF157  | NPTX1         | 1428887_at   | 1422130_at   | 0.8401 |
| HELLS   | NPTX1         | 1430139_at   | 1422130_at   | 0.8068 |
| ERCC4   | NPTX1         | 1432272_a_at | 1422130_at   | 0.8705 |
| SOX11   | NPTX1         | 1436790_a_at | 1422130_at   | 0.8202 |
| RAD51C  | NPTX1         | 1438453_at   | 1422130_at   | 0.8086 |
| NKRF    | NPTX1         | 1441325_at   | 1422130_at   | 0.8528 |
| SUPT16H | NPTX1         | 1449578_at   | 1422130_at   | 0.8268 |
| TCERG1  | NPTX1         | 1450100_a_at | 1422130_at   | 0.8441 |
| ASCL1   | NPTX1         | 1450164_at   | 1422130_at   | 0.8462 |
| ZFP354C | NPTX1         | 1450321_at   | 1422130_at   | 0.8240 |
| SOX3    | NPTX1         | 1450485_at   | 1422130_at   | 0.8458 |
| NCOR2   | NPTX1         | 1451841_a_at | 1422130_at   | 0.8610 |
| ZFP2    | NPTX1         | 1452025_a_at | 1422130_at   | 0.8039 |
| CENPF   | NPTX1         | 1452334_at   | 1422130_at   | 0.8107 |
| PHF6    | NPTX1         | 1453761_at   | 1422130_at   | 0.8562 |
| TAF2    | NPTX1         | 1457351_at   | 1422130_at   | 0.8394 |
| POU3F4  | HUS1          | 1422164_at   | 1425366_a_at | 0.8161 |
| POU3F4  | FANCI         | 1422164_at   | 1427953_at   | 0.8103 |
| POU3F4  | ADCYAP1R1     | 1422164_at   | 1439042_at   | 0.8245 |
| POU3F4  | APC           | 1422164_at   | 1450056_at   | 0.8538 |
| POU3F4  | NPAS3         | 1422164_at   | 1450287_at   | 0.9051 |
| POU3F4  | SHC3          | 1422164_at   | 1450326_at   | 0.8633 |
| POU3F4  | MYO10         | 1422164_at   | 1450651_at   | 0.8651 |
| POU3F4  | AAK1          | 1422164_at   | 1452632_at   | 0.8208 |
| POU3F4  | TTF2          | 1422164_at   | 1452818_at   | 0.8053 |
| POU3F4  | TMEM138       | 1422164_at   | 1452978_at   | 0.8407 |
| POU3F4  | 2700049P18RIK | 1422164_at   | 1456163_at   | 0.8048 |
| SF1     | CDC25C        | 1422321_a_at | 1422252_a_at | 0.8781 |
| HMGA2   | CDC25C        | 1422851_at   | 1422252_a_at | 0.9166 |
| SUV39H2 | CDC25C        | 1422979_at   | 1422252_a_at | 0.8781 |
| RAD51C  | CDC25C        | 1423026_at   | 1422252_a_at | 0.9168 |
| RAD18   | CDC25C        | 1423318_at   | 1422252_a_at | 0.8284 |
| SMARCC1 | CDC25C        | 1423417_at   | 1422252_a_at | 0.8471 |
| HIP1    | CDC25C        | 1424756_at   | 1422252_a_at | 0.9146 |



|         |            |              |              |        |
|---------|------------|--------------|--------------|--------|
| PSRC1   | CDC25C     | 1425416_s_at | 1422252_a_at | 0.9127 |
| CAND1   | CDC25C     | 1428649_at   | 1422252_a_at | 0.8687 |
| ZNF157  | CDC25C     | 1428887_at   | 1422252_a_at | 0.8617 |
| MCM8    | CDC25C     | 1429557_at   | 1422252_a_at | 0.8133 |
| HELLS   | CDC25C     | 1430139_at   | 1422252_a_at | 0.9374 |
| TGIF2   | CDC25C     | 1431115_at   | 1422252_a_at | 0.8701 |
| ERCC4   | CDC25C     | 1432272_a_at | 1422252_a_at | 0.8902 |
| SUV39H2 | CDC25C     | 1433996_at   | 1422252_a_at | 0.8782 |
| SOX3    | CDC25C     | 1435192_at   | 1422252_a_at | 0.9080 |
| PIF1    | CDC25C     | 1436738_at   | 1422252_a_at | 0.9146 |
| SOX11   | CDC25C     | 1436790_a_at | 1422252_a_at | 0.8731 |
| ASCL1   | CDC25C     | 1437086_at   | 1422252_a_at | 0.9538 |
| RAD51C  | CDC25C     | 1438453_at   | 1422252_a_at | 0.9239 |
| NKRF    | CDC25C     | 1441325_at   | 1422252_a_at | 0.9003 |
| TAF1D   | CDC25C     | 1442289_at   | 1422252_a_at | 0.8040 |
| FOXM1   | CDC25C     | 1448834_at   | 1422252_a_at | 0.9383 |
| SOX4    | CDC25C     | 1449370_at   | 1422252_a_at | 0.8456 |
| SUPT16H | CDC25C     | 1449578_at   | 1422252_a_at | 0.8695 |
| TCERG1  | CDC25C     | 1450100_a_at | 1422252_a_at | 0.8909 |
| ASCL1   | CDC25C     | 1450164_at   | 1422252_a_at | 0.9634 |
| NPAS3   | CDC25C     | 1450287_at   | 1422252_a_at | 0.8009 |
| ZFP354C | CDC25C     | 1450321_at   | 1422252_a_at | 0.8390 |
| MYBL1   | CDC25C     | 1450481_at   | 1422252_a_at | 0.8588 |
| SOX3    | CDC25C     | 1450485_at   | 1422252_a_at | 0.8848 |
| HMGA2   | CDC25C     | 1450780_s_at | 1422252_a_at | 0.9183 |
| ZNF451  | CDC25C     | 1451816_at   | 1422252_a_at | 0.8399 |
| NCOR2   | CDC25C     | 1451841_a_at | 1422252_a_at | 0.8710 |
| ZFP2    | CDC25C     | 1452025_a_at | 1422252_a_at | 0.8825 |
| ZBED3   | CDC25C     | 1452088_at   | 1422252_a_at | 0.8074 |
| CENPF   | CDC25C     | 1452334_at   | 1422252_a_at | 0.8659 |
| MLF1IP  | CDC25C     | 1452816_at   | 1422252_a_at | 0.8349 |
| TTF2    | CDC25C     | 1452818_at   | 1422252_a_at | 0.9022 |
| PHF6    | CDC25C     | 1453761_at   | 1422252_a_at | 0.9037 |
| TAF2    | CDC25C     | 1457351_at   | 1422252_a_at | 0.8979 |
| ZNF69   | CDC25C     | 1458274_at   | 1422252_a_at | 0.8057 |
| SF1     | RAB23      | 1422321_a_at | 1422399_a_at | 0.9371 |
| SF1     | ILF3       | 1422321_a_at | 1422546_at   | 0.8092 |
| SF1     | HMGA2      | 1422321_a_at | 1422851_at   | 0.8681 |
| SF1     | SUV39H2    | 1422321_a_at | 1422979_at   | 0.9071 |
| SF1     | RAD51C     | 1422321_a_at | 1423026_at   | 0.9306 |
| SF1     | INCENP     | 1422321_a_at | 1423093_at   | 0.9078 |
| SF1     | SMARCC1    | 1422321_a_at | 1423417_at   | 0.8711 |
| SF1     | D2ERTD750E | 1422321_a_at | 1423464_at   | 0.9363 |
| SF1     | SEPT2      | 1422321_a_at | 1423473_at   | 0.8712 |
| SF1     | MASTL      | 1422321_a_at | 1423524_at   | 0.9058 |
| SF1     | MASTL      | 1422321_a_at | 1423525_at   | 0.9164 |
| SF1     | KCNC1      | 1422321_a_at | 1423559_at   | 0.8381 |
| SF1     | TMEM48     | 1422321_a_at | 1424173_at   | 0.9440 |
| SF1     | HIP1       | 1422321_a_at | 1424756_at   | 0.9471 |
| SF1     | WDR62      | 1422321_a_at | 1424849_at   | 0.8894 |
| SF1     | HUS1       | 1422321_a_at | 1425366_a_at | 0.8644 |

|     |               |              |              |        |
|-----|---------------|--------------|--------------|--------|
| SF1 | PSRC1         | 1422321_a_at | 1425416_s_at | 0.9469 |
| SF1 | CD109         | 1422321_a_at | 1425658_at   | 0.9451 |
| SF1 | CCDC77        | 1422321_a_at | 1425734_a_at | 0.9025 |
| SF1 | FANCI         | 1422321_a_at | 1425941_a_at | 0.8756 |
| SF1 | CDC7          | 1422321_a_at | 1426021_a_at | 0.9243 |
| SF1 | PVT1          | 1422321_a_at | 1427140_at   | 0.8563 |
| SF1 | RG9MTD2       | 1422321_a_at | 1427375_at   | 0.8860 |
| SF1 | FANCI         | 1422321_a_at | 1427953_at   | 0.8910 |
| SF1 | SRGAP2        | 1422321_a_at | 1427967_at   | 0.9526 |
| SF1 | CAND1         | 1422321_a_at | 1428649_at   | 0.9368 |
| SF1 | ZNF157        | 1422321_a_at | 1428887_at   | 0.9443 |
| SF1 | RASL11A       | 1422321_a_at | 1429444_at   | 0.8586 |
| SF1 | MCM8          | 1422321_a_at | 1429557_at   | 0.8119 |
| SF1 | SMC2          | 1422321_a_at | 1429659_at   | 0.8581 |
| SF1 | 6230416J20RIK | 1422321_a_at | 1429665_at   | 0.8809 |
| SF1 | 4632434I11RIK | 1422321_a_at | 1429734_at   | 0.9185 |
| SF1 | HELLS         | 1422321_a_at | 1430139_at   | 0.8568 |
| SF1 | CEP70         | 1422321_a_at | 1430231_a_at | 0.9227 |
| SF1 | NUP205        | 1422321_a_at | 1430343_at   | 0.8424 |
| SF1 | TGIF2         | 1422321_a_at | 1431115_at   | 0.8937 |
| SF1 | PGAP1         | 1422321_a_at | 1431169_at   | 0.8573 |
| SF1 | DLG5          | 1422321_a_at | 1431187_s_at | 0.8601 |
| SF1 | PVT1          | 1422321_a_at | 1431352_s_at | 0.8860 |
| SF1 | JAM2          | 1422321_a_at | 1431416_a_at | 0.8366 |
| SF1 | 4933432K03RIK | 1422321_a_at | 1431489_at   | 0.8512 |
| SF1 | 2610021K21RIK | 1422321_a_at | 1431667_s_at | 0.8275 |
| SF1 | RAB31         | 1422321_a_at | 1431691_a_at | 0.9019 |
| SF1 | PIGN          | 1422321_a_at | 1432115_a_at | 0.8898 |
| SF1 | ERCC4         | 1422321_a_at | 1432272_a_at | 0.9484 |
| SF1 | ARMC9         | 1422321_a_at | 1432383_a_at | 0.9422 |
| SF1 | 1700106N22RIK | 1422321_a_at | 1432504_at   | 0.8869 |
| SF1 | SUV39H2       | 1422321_a_at | 1433996_at   | 0.8332 |
| SF1 | NPHP4         | 1422321_a_at | 1434024_at   | 0.9089 |
| SF1 | SRGAP2        | 1422321_a_at | 1434407_at   | 0.8587 |
| SF1 | SOX3          | 1422321_a_at | 1435192_at   | 0.8032 |
| SF1 | EXOD1         | 1422321_a_at | 1435390_at   | 0.8153 |
| SF1 | CD109         | 1422321_a_at | 1436346_at   | 0.9348 |
| SF1 | CEP78         | 1422321_a_at | 1436352_at   | 0.8236 |
| SF1 | ZBTB12        | 1422321_a_at | 1436382_at   | 0.8666 |
| SF1 | SDC3          | 1422321_a_at | 1436482_a_at | 0.8808 |
| SF1 | PIF1          | 1422321_a_at | 1436738_at   | 0.8379 |
| SF1 | SOX11         | 1422321_a_at | 1436790_a_at | 0.8639 |
| SF1 | 4922501L14RIK | 1422321_a_at | 1436969_at   | 0.8145 |
| SF1 | ASCL1         | 1422321_a_at | 1437086_at   | 0.8517 |
| SF1 | LRRC4B        | 1422321_a_at | 1437183_at   | 0.8737 |
| SF1 | 2810408I11RIK | 1422321_a_at | 1437549_at   | 0.8816 |
| SF1 | AV164956      | 1422321_a_at | 1437673_at   | 0.8959 |
| SF1 | HEATR5B       | 1422321_a_at | 1438085_at   | 0.8571 |
| SF1 | 4933432K03RIK | 1422321_a_at | 1438356_x_at | 0.8979 |
| SF1 | RAD51C        | 1422321_a_at | 1438453_at   | 0.8349 |
| SF1 | DHX33         | 1422321_a_at | 1438765_at   | 0.9110 |

|     |               |              |              |        |
|-----|---------------|--------------|--------------|--------|
| SF1 | AHI1          | 1422321_a_at | 1439083_at   | 0.8522 |
| SF1 | FANCD2        | 1422321_a_at | 1439091_at   | 0.8536 |
| SF1 | AI506816      | 1422321_a_at | 1439483_at   | 0.9384 |
| SF1 | AI746468      | 1422321_a_at | 1439960_at   | 0.9231 |
| SF1 | ABCC12        | 1422321_a_at | 1439985_at   | 0.8348 |
| SF1 | A930024E05RIK | 1422321_a_at | 1440206_at   | 0.9085 |
| SF1 | SPRY4         | 1422321_a_at | 1440867_at   | 0.8037 |
| SF1 | KIF20B        | 1422321_a_at | 1440924_at   | 0.8121 |
| SF1 | A430071A18RIK | 1422321_a_at | 1441113_at   | 0.8101 |
| SF1 | MATR3         | 1422321_a_at | 1441272_at   | 0.8279 |
| SF1 | KBTBD8        | 1422321_a_at | 1441275_at   | 0.8808 |
| SF1 | NKRF          | 1422321_a_at | 1441325_at   | 0.9158 |
| SF1 | AU043080      | 1422321_a_at | 1441375_at   | 0.8286 |
| SF1 | ASPM          | 1422321_a_at | 1441520_at   | 0.8312 |
| SF1 | D2ERTD750E    | 1422321_a_at | 1442280_at   | 0.8582 |
| SF1 | TTK           | 1422321_a_at | 1442594_at   | 0.9167 |
| SF1 | BB337104      | 1422321_a_at | 1443026_at   | 0.8411 |
| SF1 | BB444561      | 1422321_a_at | 1443171_at   | 0.8958 |
| SF1 | BB340127      | 1422321_a_at | 1443230_at   | 0.8466 |
| SF1 | BB130444      | 1422321_a_at | 1443410_at   | 0.8347 |
| SF1 | ZBTB39        | 1422321_a_at | 1443880_at   | 0.9138 |
| SF1 | CDK5RAP2      | 1422321_a_at | 1443976_at   | 0.8574 |
| SF1 | ERCC6L        | 1422321_a_at | 1444024_at   | 0.9331 |
| SF1 | AV228095      | 1422321_a_at | 1444443_at   | 0.8918 |
| SF1 | 6530418L21RIK | 1422321_a_at | 1444723_at   | 0.9316 |
| SF1 | MASTL         | 1422321_a_at | 1444725_at   | 0.8293 |
| SF1 | BC023969      | 1422321_a_at | 1445226_at   | 0.9454 |
| SF1 | AV323315      | 1422321_a_at | 1445298_at   | 0.8504 |
| SF1 | KCND3         | 1422321_a_at | 1447513_at   | 0.9533 |
| SF1 | SEMA6D        | 1422321_a_at | 1448060_at   | 0.8823 |
| SF1 | OGG1          | 1422321_a_at | 1448815_at   | 0.8767 |
| SF1 | FOXM1         | 1422321_a_at | 1448834_at   | 0.9252 |
| SF1 | SKP2          | 1422321_a_at | 1449293_a_at | 0.9228 |
| SF1 | SOX4          | 1422321_a_at | 1449370_at   | 0.8570 |
| SF1 | SUPT16H       | 1422321_a_at | 1449578_at   | 0.8808 |
| SF1 | CCNB1         | 1422321_a_at | 1449675_at   | 0.8960 |
| SF1 | LFNG          | 1422321_a_at | 1449943_at   | 0.9261 |
| SF1 | APC           | 1422321_a_at | 1450056_at   | 0.8228 |
| SF1 | 4933411K20RIK | 1422321_a_at | 1450076_at   | 0.8887 |
| SF1 | TCERG1        | 1422321_a_at | 1450100_a_at | 0.9090 |
| SF1 | ASCL1         | 1422321_a_at | 1450164_at   | 0.9359 |
| SF1 | PCDHB11       | 1422321_a_at | 1450270_at   | 0.8104 |
| SF1 | ZFP354C       | 1422321_a_at | 1450321_at   | 0.9232 |
| SF1 | SHC3          | 1422321_a_at | 1450326_at   | 0.8804 |
| SF1 | MYBL1         | 1422321_a_at | 1450481_at   | 0.8362 |
| SF1 | SOX3          | 1422321_a_at | 1450485_at   | 0.9344 |
| SF1 | HMGA2         | 1422321_a_at | 1450780_s_at | 0.8408 |
| SF1 | ZNF451        | 1422321_a_at | 1451816_at   | 0.8454 |
| SF1 | NCOR2         | 1422321_a_at | 1451841_a_at | 0.9535 |
| SF1 | LMNB2         | 1422321_a_at | 1451849_a_at | 0.8936 |
| SF1 | ZFP2          | 1422321_a_at | 1452025_a_at | 0.9125 |

|         |                       |              |                       |        |
|---------|-----------------------|--------------|-----------------------|--------|
| SF1     | 6720460F02RIK         | 1422321_a_at | 1452073_at            | 0.9174 |
| SF1     | ZBED3                 | 1422321_a_at | 1452088_at            | 0.8018 |
| SF1     | RRP1B                 | 1422321_a_at | 1452119_at            | 0.8896 |
| SF1     | NOVA1                 | 1422321_a_at | 1452245_at            | 0.8514 |
| SF1     | PVT1                  | 1422321_a_at | 1452324_at            | 0.8004 |
| SF1     | CENPF                 | 1422321_a_at | 1452334_at            | 0.8367 |
| SF1     | ADAMTS7               | 1422321_a_at | 1452339_at            | 0.8607 |
| SF1     | ASPM                  | 1422321_a_at | 1452459_at            | 0.8950 |
| SF1     | TTF2                  | 1422321_a_at | 1452818_at            | 0.8889 |
| SF1     | TMEM138               | 1422321_a_at | 1452978_at            | 0.8375 |
| SF1     | RHOBTB3               | 1422321_a_at | 1453227_at            | 0.9456 |
| SF1     | CALR3                 | 1422321_a_at | 1453232_at            | 0.8022 |
| SF1     | HELLS                 | 1422321_a_at | 1453361_at            | 0.8159 |
| SF1     | TROAP                 | 1422321_a_at | 1453370_at            | 0.9244 |
| SF1     | CEP55                 | 1422321_a_at | 1453683_a_at          | 0.9103 |
| SF1     | DHX38                 | 1422321_a_at | 1453751_at            | 0.8984 |
| SF1     | PHF6                  | 1422321_a_at | 1453761_at            | 0.9156 |
| SF1     | FAM110A               | 1422321_a_at | 1453768_a_at          | 0.8952 |
| SF1     | NETO2                 | 1422321_a_at | 1454032_at            | 0.8877 |
| SF1     | CCDC77                | 1422321_a_at | 1454228_a_at          | 0.8953 |
| SF1     | EXOD1                 | 1422321_a_at | 1454229_a_at          | 0.9290 |
| SF1     | XKR5                  | 1422321_a_at | 1455127_at            | 0.8189 |
| SF1     | UTP23                 | 1422321_a_at | 1455259_a_at          | 0.8490 |
| SF1     | ATP5G2                | 1422321_a_at | 1456128_at            | 0.8364 |
| SF1     | 2700049P18RIK         | 1422321_a_at | 1456163_at            | 0.8805 |
| SF1     | BB053540              | 1422321_a_at | 1456840_at            | 0.8246 |
| SF1     | AV254764              | 1422321_a_at | 1456951_at            | 0.8417 |
| SF1     | TAF2                  | 1422321_a_at | 1457351_at            | 0.9034 |
| SF1     | ZNF69                 | 1422321_a_at | 1458274_at            | 0.8133 |
| SF1     | RNF219                | 1422321_a_at | 1458636_at            | 0.9266 |
| SF1     | 6530418L21RIK         | 1422321_a_at | 1459051_at            | 0.8757 |
| SF1     | AFFX-DapX-5_at        | 1422321_a_at | AFFX-DapX-5_at        | 0.8662 |
| SF1     | AFFX-r2-Bs-dap-5_at   | 1422321_a_at | AFFX-r2-Bs-dap-5_at   | 0.8607 |
| SF1     | AFFX-r2-Bs-lys-5_at   | 1422321_a_at | AFFX-r2-Bs-lys-5_at   | 0.8283 |
| SF1     | AFFX-r2-Bs-thr-5_s_at | 1422321_a_at | AFFX-r2-Bs-thr-5_s_at | 0.8395 |
| SF1     | AFFX-ThrX-5_at        | 1422321_a_at | AFFX-ThrX-5_at        | 0.8390 |
| ILF3    | RAB23                 | 1422546_at   | 1422399_a_at          | 0.8699 |
| HMGA2   | RAB23                 | 1422851_at   | 1422399_a_at          | 0.8917 |
| SUV39H2 | RAB23                 | 1422979_at   | 1422399_a_at          | 0.9550 |
| RAD51C  | RAB23                 | 1423026_at   | 1422399_a_at          | 0.9901 |
| RAD18   | RAB23                 | 1423318_at   | 1422399_a_at          | 0.8478 |
| SMARCC1 | RAB23                 | 1423417_at   | 1422399_a_at          | 0.9312 |
| HIP1    | RAB23                 | 1424756_at   | 1422399_a_at          | 0.9798 |
| PSRC1   | RAB23                 | 1425416_s_at | 1422399_a_at          | 0.9815 |
| CAND1   | RAB23                 | 1428649_at   | 1422399_a_at          | 0.9613 |
| ZNF157  | RAB23                 | 1428887_at   | 1422399_a_at          | 0.9450 |
| MCM8    | RAB23                 | 1429557_at   | 1422399_a_at          | 0.8975 |
| HELLS   | RAB23                 | 1430139_at   | 1422399_a_at          | 0.8966 |
| TLE4    | RAB23                 | 1430384_at   | 1422399_a_at          | 0.8405 |
| TGIF2   | RAB23                 | 1431115_at   | 1422399_a_at          | 0.8955 |
| ERCC4   | RAB23                 | 1432272_a_at | 1422399_a_at          | 0.9892 |

|         |            |              |              |        |
|---------|------------|--------------|--------------|--------|
| SUV39H2 | RAB23      | 1433996_at   | 1422399_a_at | 0.9113 |
| PIF1    | RAB23      | 1436738_at   | 1422399_a_at | 0.8667 |
| SOX11   | RAB23      | 1436790_a_at | 1422399_a_at | 0.9089 |
| ASCL1   | RAB23      | 1437086_at   | 1422399_a_at | 0.8608 |
| RAD51C  | RAB23      | 1438453_at   | 1422399_a_at | 0.9034 |
| NKRF    | RAB23      | 1441325_at   | 1422399_a_at | 0.9743 |
| TAF1D   | RAB23      | 1442289_at   | 1422399_a_at | 0.8403 |
| FOXM1   | RAB23      | 1448834_at   | 1422399_a_at | 0.9366 |
| SOX4    | RAB23      | 1449370_at   | 1422399_a_at | 0.8601 |
| SUPT16H | RAB23      | 1449578_at   | 1422399_a_at | 0.9372 |
| TCERG1  | RAB23      | 1450100_a_at | 1422399_a_at | 0.9770 |
| ASCL1   | RAB23      | 1450164_at   | 1422399_a_at | 0.9622 |
| ZFP354C | RAB23      | 1450321_at   | 1422399_a_at | 0.9353 |
| MYBL1   | RAB23      | 1450481_at   | 1422399_a_at | 0.9164 |
| SOX3    | RAB23      | 1450485_at   | 1422399_a_at | 0.9600 |
| SALL1   | RAB23      | 1450489_at   | 1422399_a_at | 0.8098 |
| HMGA2   | RAB23      | 1450780_s_at | 1422399_a_at | 0.8855 |
| ZNF451  | RAB23      | 1451816_at   | 1422399_a_at | 0.8822 |
| NCOR2   | RAB23      | 1451841_a_at | 1422399_a_at | 0.9681 |
| ZFP2    | RAB23      | 1452025_a_at | 1422399_a_at | 0.9483 |
| ZBED3   | RAB23      | 1452088_at   | 1422399_a_at | 0.8369 |
| CENPF   | RAB23      | 1452334_at   | 1422399_a_at | 0.9392 |
| MLF1IP  | RAB23      | 1452816_at   | 1422399_a_at | 0.8716 |
| TTF2    | RAB23      | 1452818_at   | 1422399_a_at | 0.9255 |
| HELLS   | RAB23      | 1453361_at   | 1422399_a_at | 0.8044 |
| PHF6    | RAB23      | 1453761_at   | 1422399_a_at | 0.9756 |
| TAF2    | RAB23      | 1457351_at   | 1422399_a_at | 0.9753 |
| ZNF69   | RAB23      | 1458274_at   | 1422399_a_at | 0.8816 |
| ILF3    | SUV39H2    | 1422546_at   | 1422979_at   | 0.8815 |
| ILF3    | RAD51C     | 1422546_at   | 1423026_at   | 0.8572 |
| ILF3    | INCENP     | 1422546_at   | 1423093_at   | 0.8033 |
| ILF3    | SMARCC1    | 1422546_at   | 1423417_at   | 0.8849 |
| ILF3    | D2ERTD750E | 1422546_at   | 1423464_at   | 0.8269 |
| ILF3    | SEPT2      | 1422546_at   | 1423473_at   | 0.8116 |
| ILF3    | MASTL      | 1422546_at   | 1423524_at   | 0.8421 |
| ILF3    | MASTL      | 1422546_at   | 1423525_at   | 0.8078 |
| ILF3    | KCNC1      | 1422546_at   | 1423559_at   | 0.8146 |
| ILF3    | TMEM48     | 1422546_at   | 1424173_at   | 0.8591 |
| ILF3    | HIP1       | 1422546_at   | 1424756_at   | 0.8335 |
| ILF3    | ATP6V0A1   | 1422546_at   | 1425227_a_at | 0.8032 |
| ILF3    | PSRC1      | 1422546_at   | 1425416_s_at | 0.8531 |
| ILF3    | CD109      | 1422546_at   | 1425658_at   | 0.8438 |
| ILF3    | CCDC77     | 1422546_at   | 1425734_a_at | 0.8125 |
| ILF3    | FANCI      | 1422546_at   | 1425941_a_at | 0.8311 |
| ILF3    | CDC7       | 1422546_at   | 1426021_a_at | 0.8199 |
| ILF3    | PVT1       | 1422546_at   | 1427140_at   | 0.8604 |
| ILF3    | RG9MTD2    | 1422546_at   | 1427375_at   | 0.8420 |
| ILF3    | SRGAP2     | 1422546_at   | 1427967_at   | 0.8579 |
| ILF3    | CAND1      | 1422546_at   | 1428649_at   | 0.8365 |
| ILF3    | ZNF157     | 1422546_at   | 1428887_at   | 0.8276 |
| ILF3    | SMC2       | 1422546_at   | 1429659_at   | 0.8327 |

|      |               |            |              |        |
|------|---------------|------------|--------------|--------|
| ILF3 | 6230416J20RIK | 1422546_at | 1429665_at   | 0.8691 |
| ILF3 | 4632434I11RIK | 1422546_at | 1429734_at   | 0.8526 |
| ILF3 | HELLS         | 1422546_at | 1430139_at   | 0.8093 |
| ILF3 | CEP70         | 1422546_at | 1430231_a_at | 0.8489 |
| ILF3 | NUP205        | 1422546_at | 1430343_at   | 0.8087 |
| ILF3 | PGAP1         | 1422546_at | 1431169_at   | 0.8237 |
| ILF3 | PVT1          | 1422546_at | 1431352_s_at | 0.8054 |
| ILF3 | 2610021K21RIK | 1422546_at | 1431667_s_at | 0.8024 |
| ILF3 | PIGN          | 1422546_at | 1432115_a_at | 0.8344 |
| ILF3 | ERCC4         | 1422546_at | 1432272_a_at | 0.8605 |
| ILF3 | ARMC9         | 1422546_at | 1432383_a_at | 0.8501 |
| ILF3 | SUV39H2       | 1422546_at | 1433996_at   | 0.8293 |
| ILF3 | NPHP4         | 1422546_at | 1434024_at   | 0.8049 |
| ILF3 | SRGAP2        | 1422546_at | 1434407_at   | 0.9048 |
| ILF3 | CD109         | 1422546_at | 1436346_at   | 0.8091 |
| ILF3 | SOX11         | 1422546_at | 1436790_a_at | 0.8522 |
| ILF3 | 2810408I11RIK | 1422546_at | 1437549_at   | 0.8158 |
| ILF3 | HEATR5B       | 1422546_at | 1438085_at   | 0.8115 |
| ILF3 | 4933432K03RIK | 1422546_at | 1438356_x_at | 0.8255 |
| ILF3 | RAD51C        | 1422546_at | 1438453_at   | 0.8426 |
| ILF3 | DHX33         | 1422546_at | 1438765_at   | 0.8562 |
| ILF3 | AHI1          | 1422546_at | 1439083_at   | 0.8642 |
| ILF3 | A1506816      | 1422546_at | 1439483_at   | 0.8538 |
| ILF3 | A1746468      | 1422546_at | 1439960_at   | 0.8098 |
| ILF3 | A930024E05RIK | 1422546_at | 1440206_at   | 0.8505 |
| ILF3 | WDR35         | 1422546_at | 1440318_at   | 0.8636 |
| ILF3 | KBTBD8        | 1422546_at | 1441275_at   | 0.8231 |
| ILF3 | NKRF          | 1422546_at | 1441325_at   | 0.8415 |
| ILF3 | AU043080      | 1422546_at | 1441375_at   | 0.8258 |
| ILF3 | ASPM          | 1422546_at | 1441520_at   | 0.8202 |
| ILF3 | TTK           | 1422546_at | 1442594_at   | 0.8436 |
| ILF3 | BB444561      | 1422546_at | 1443171_at   | 0.8310 |
| ILF3 | ERCC6L        | 1422546_at | 1444024_at   | 0.8528 |
| ILF3 | AV228095      | 1422546_at | 1444443_at   | 0.8258 |
| ILF3 | 6530418L21RIK | 1422546_at | 1444723_at   | 0.8139 |
| ILF3 | BC023969      | 1422546_at | 1445226_at   | 0.8704 |
| ILF3 | KCND3         | 1422546_at | 1447513_at   | 0.8463 |
| ILF3 | SKP2          | 1422546_at | 1449293_a_at | 0.8557 |
| ILF3 | SOX4          | 1422546_at | 1449370_at   | 0.8726 |
| ILF3 | SUPT16H       | 1422546_at | 1449578_at   | 0.9011 |
| ILF3 | CCNB1         | 1422546_at | 1449675_at   | 0.8425 |
| ILF3 | 4933411K20RIK | 1422546_at | 1450076_at   | 0.8443 |
| ILF3 | TCERG1        | 1422546_at | 1450100_a_at | 0.8675 |
| ILF3 | ASCL1         | 1422546_at | 1450164_at   | 0.8419 |
| ILF3 | ZFP354C       | 1422546_at | 1450321_at   | 0.8201 |
| ILF3 | SOX3          | 1422546_at | 1450485_at   | 0.8242 |
| ILF3 | NCOR2         | 1422546_at | 1451841_a_at | 0.8303 |
| ILF3 | ZFP2          | 1422546_at | 1452025_a_at | 0.8711 |
| ILF3 | 6720460F02RIK | 1422546_at | 1452073_at   | 0.8012 |
| ILF3 | NOVA1         | 1422546_at | 1452245_at   | 0.8059 |
| ILF3 | CENPF         | 1422546_at | 1452334_at   | 0.8117 |

|       |               |            |              |        |
|-------|---------------|------------|--------------|--------|
| ILF3  | ASPM          | 1422546_at | 1452459_at   | 0.8196 |
| ILF3  | RHOBTB3       | 1422546_at | 1453227_at   | 0.8607 |
| ILF3  | TROAP         | 1422546_at | 1453370_at   | 0.8299 |
| ILF3  | CEP55         | 1422546_at | 1453683_a_at | 0.8294 |
| ILF3  | DHX38         | 1422546_at | 1453751_at   | 0.8300 |
| ILF3  | PHF6          | 1422546_at | 1453761_at   | 0.8381 |
| ILF3  | NETO2         | 1422546_at | 1454032_at   | 0.8135 |
| ILF3  | EXOD1         | 1422546_at | 1454229_a_at | 0.8484 |
| ILF3  | UTP23         | 1422546_at | 1455259_a_at | 0.8114 |
| ILF3  | TAF2          | 1422546_at | 1457351_at   | 0.8526 |
| ILF3  | RNF219        | 1422546_at | 1458636_at   | 0.8404 |
| SOX4  | FBN2          | 1449370_at | 1422831_at   | 0.8381 |
| HMGA2 | SUV39H2       | 1422851_at | 1422979_at   | 0.9007 |
| HMGA2 | RAD51C        | 1422851_at | 1423026_at   | 0.9223 |
| HMGA2 | INCENP        | 1422851_at | 1423093_at   | 0.9571 |
| HMGA2 | RAD18         | 1422851_at | 1423318_at   | 0.9592 |
| HMGA2 | SMARCC1       | 1422851_at | 1423417_at   | 0.8719 |
| HMGA2 | D2ERTD750E    | 1422851_at | 1423464_at   | 0.9172 |
| HMGA2 | SEPT2         | 1422851_at | 1423473_at   | 0.8742 |
| HMGA2 | MASTL         | 1422851_at | 1423524_at   | 0.9296 |
| HMGA2 | MASTL         | 1422851_at | 1423525_at   | 0.9168 |
| HMGA2 | TMEM48        | 1422851_at | 1424173_at   | 0.9107 |
| HMGA2 | CAMKK2        | 1422851_at | 1424476_at   | 0.9152 |
| HMGA2 | HIP1          | 1422851_at | 1424756_at   | 0.9091 |
| HMGA2 | WDR62         | 1422851_at | 1424849_at   | 0.8835 |
| HMGA2 | HUS1          | 1422851_at | 1425366_a_at | 0.8740 |
| HMGA2 | PSRC1         | 1422851_at | 1425416_s_at | 0.8648 |
| HMGA2 | CD109         | 1422851_at | 1425658_at   | 0.9451 |
| HMGA2 | CCDC77        | 1422851_at | 1425734_a_at | 0.9492 |
| HMGA2 | FANCI         | 1422851_at | 1425941_a_at | 0.8894 |
| HMGA2 | CDC7          | 1422851_at | 1426021_a_at | 0.9140 |
| HMGA2 | RG9MTD2       | 1422851_at | 1427375_at   | 0.9096 |
| HMGA2 | PEG10         | 1422851_at | 1427550_at   | 0.8719 |
| HMGA2 | FANCI         | 1422851_at | 1427953_at   | 0.9435 |
| HMGA2 | SRGAP2        | 1422851_at | 1427967_at   | 0.8594 |
| HMGA2 | CAND1         | 1422851_at | 1428649_at   | 0.9198 |
| HMGA2 | SPDYA         | 1422851_at | 1429470_at   | 0.8819 |
| HMGA2 | MCM8          | 1422851_at | 1429557_at   | 0.8810 |
| HMGA2 | SMC2          | 1422851_at | 1429659_at   | 0.9009 |
| HMGA2 | 6230416J20RIK | 1422851_at | 1429665_at   | 0.8320 |
| HMGA2 | 4632434I11RIK | 1422851_at | 1429734_at   | 0.8566 |
| HMGA2 | HELLS         | 1422851_at | 1430139_at   | 0.9100 |
| HMGA2 | CEP70         | 1422851_at | 1430231_a_at | 0.9127 |
| HMGA2 | NUP205        | 1422851_at | 1430343_at   | 0.8731 |
| HMGA2 | NCAPD3        | 1422851_at | 1430782_at   | 0.8773 |
| HMGA2 | RCBTB2        | 1422851_at | 1431017_at   | 0.8301 |
| HMGA2 | MPHOSPH9      | 1422851_at | 1431053_at   | 0.8227 |
| HMGA2 | TGIF2         | 1422851_at | 1431115_at   | 0.8642 |
| HMGA2 | PGAP1         | 1422851_at | 1431169_at   | 0.8911 |
| HMGA2 | DLG5          | 1422851_at | 1431187_s_at | 0.8279 |
| HMGA2 | MATR3         | 1422851_at | 1431235_at   | 0.8619 |

|       |               |            |              |        |
|-------|---------------|------------|--------------|--------|
| HMGA2 | 4933432K03RIK | 1422851_at | 1431489_at   | 0.9498 |
| HMGA2 | PPIH          | 1422851_at | 1431505_at   | 0.8001 |
| HMGA2 | 2610021K21RIK | 1422851_at | 1431667_s_at | 0.8948 |
| HMGA2 | RAB31         | 1422851_at | 1431691_a_at | 0.8157 |
| HMGA2 | PIGN          | 1422851_at | 1432115_a_at | 0.9378 |
| HMGA2 | ERCC4         | 1422851_at | 1432272_a_at | 0.8622 |
| HMGA2 | MIPOL1        | 1422851_at | 1432284_at   | 0.9138 |
| HMGA2 | ARMC9         | 1422851_at | 1432383_a_at | 0.8439 |
| HMGA2 | 1700106N22RIK | 1422851_at | 1432504_at   | 0.9254 |
| HMGA2 | SUV39H2       | 1422851_at | 1433996_at   | 0.8985 |
| HMGA2 | NPHP4         | 1422851_at | 1434024_at   | 0.8412 |
| HMGA2 | SRGAP2        | 1422851_at | 1434407_at   | 0.8062 |
| HMGA2 | EXOD1         | 1422851_at | 1435390_at   | 0.8931 |
| HMGA2 | GEMIN5        | 1422851_at | 1436311_at   | 0.8403 |
| HMGA2 | CD109         | 1422851_at | 1436346_at   | 0.9282 |
| HMGA2 | CEP78         | 1422851_at | 1436352_at   | 0.8618 |
| HMGA2 | ZBTB12        | 1422851_at | 1436382_at   | 0.9657 |
| HMGA2 | PPP1R14B      | 1422851_at | 1436716_at   | 0.9078 |
| HMGA2 | PIF1          | 1422851_at | 1436738_at   | 0.9762 |
| HMGA2 | SOX11         | 1422851_at | 1436790_a_at | 0.8011 |
| HMGA2 | 4922501L14RIK | 1422851_at | 1436969_at   | 0.9226 |
| HMGA2 | ASCL1         | 1422851_at | 1437086_at   | 0.8452 |
| HMGA2 | 2810408I11RIK | 1422851_at | 1437549_at   | 0.9611 |
| HMGA2 | PIGT          | 1422851_at | 1437594_x_at | 0.8614 |
| HMGA2 | AV164956      | 1422851_at | 1437673_at   | 0.8509 |
| HMGA2 | 4933432K03RIK | 1422851_at | 1438356_x_at | 0.9345 |
| HMGA2 | RAD51C        | 1422851_at | 1438453_at   | 0.9379 |
| HMGA2 | DHX33         | 1422851_at | 1438765_at   | 0.9217 |
| HMGA2 | AH11          | 1422851_at | 1439083_at   | 0.8514 |
| HMGA2 | FANCD2        | 1422851_at | 1439091_at   | 0.8992 |
| HMGA2 | AI506816      | 1422851_at | 1439483_at   | 0.8518 |
| HMGA2 | AI746468      | 1422851_at | 1439960_at   | 0.9280 |
| HMGA2 | ABCC12        | 1422851_at | 1439985_at   | 0.8422 |
| HMGA2 | A930024E05RIK | 1422851_at | 1440206_at   | 0.9125 |
| HMGA2 | SPRY4         | 1422851_at | 1440867_at   | 0.8451 |
| HMGA2 | KIF20B        | 1422851_at | 1440924_at   | 0.9155 |
| HMGA2 | A430071A18RIK | 1422851_at | 1441113_at   | 0.9332 |
| HMGA2 | MATR3         | 1422851_at | 1441272_at   | 0.9529 |
| HMGA2 | KBTBD8        | 1422851_at | 1441275_at   | 0.9490 |
| HMGA2 | NKRF          | 1422851_at | 1441325_at   | 0.9176 |
| HMGA2 | AU043080      | 1422851_at | 1441375_at   | 0.8620 |
| HMGA2 | CCDC38        | 1422851_at | 1441965_at   | 0.8126 |
| HMGA2 | D2ERTD750E    | 1422851_at | 1442280_at   | 0.8651 |
| HMGA2 | TAF1D         | 1422851_at | 1442289_at   | 0.9422 |
| HMGA2 | NUP188        | 1422851_at | 1442314_at   | 0.8099 |
| HMGA2 | TTK           | 1422851_at | 1442594_at   | 0.9153 |
| HMGA2 | AW545941      | 1422851_at | 1443007_at   | 0.8836 |
| HMGA2 | BB444561      | 1422851_at | 1443171_at   | 0.9341 |
| HMGA2 | BM202761      | 1422851_at | 1443800_at   | 0.9586 |
| HMGA2 | ZBTB39        | 1422851_at | 1443880_at   | 0.8789 |
| HMGA2 | ERCC6L        | 1422851_at | 1444024_at   | 0.9207 |



|       |               |            |              |        |
|-------|---------------|------------|--------------|--------|
| HMGA2 | AV228095      | 1422851_at | 1444443_at   | 0.9544 |
| HMGA2 | 6530418L21RIK | 1422851_at | 1444723_at   | 0.8270 |
| HMGA2 | MASTL         | 1422851_at | 1444725_at   | 0.9008 |
| HMGA2 | BC023969      | 1422851_at | 1445226_at   | 0.8734 |
| HMGA2 | C530044C16RIK | 1422851_at | 1445247_at   | 0.9024 |
| HMGA2 | AV323315      | 1422851_at | 1445298_at   | 0.9044 |
| HMGA2 | 9330118A15RIK | 1422851_at | 1446612_at   | 0.8726 |
| HMGA2 | BE953578      | 1422851_at | 1447298_at   | 0.8100 |
| HMGA2 | KCND3         | 1422851_at | 1447513_at   | 0.9078 |
| HMGA2 | SEMA6D        | 1422851_at | 1448060_at   | 0.8117 |
| HMGA2 | OGG1          | 1422851_at | 1448815_at   | 0.9378 |
| HMGA2 | FOXM1         | 1422851_at | 1448834_at   | 0.8655 |
| HMGA2 | SKP2          | 1422851_at | 1449293_a_at | 0.9307 |
| HMGA2 | SUPT16H       | 1422851_at | 1449578_at   | 0.9036 |
| HMGA2 | CCNB1         | 1422851_at | 1449675_at   | 0.9268 |
| HMGA2 | 4933411K20RIK | 1422851_at | 1450076_at   | 0.9266 |
| HMGA2 | TCERG1        | 1422851_at | 1450100_a_at | 0.9203 |
| HMGA2 | ASCL1         | 1422851_at | 1450164_at   | 0.9088 |
| HMGA2 | MED1          | 1422851_at | 1450402_at   | 0.8736 |
| HMGA2 | MYBL1         | 1422851_at | 1450481_at   | 0.9532 |
| HMGA2 | SOX3          | 1422851_at | 1450485_at   | 0.9001 |
| HMGA2 | SALL1         | 1422851_at | 1450489_at   | 0.8371 |
| HMGA2 | ZNF451        | 1422851_at | 1451816_at   | 0.9629 |
| HMGA2 | NCOR2         | 1422851_at | 1451841_a_at | 0.8298 |
| HMGA2 | LMNB2         | 1422851_at | 1451849_a_at | 0.9051 |
| HMGA2 | ZFP2          | 1422851_at | 1452025_a_at | 0.8704 |
| HMGA2 | 6720460F02RIK | 1422851_at | 1452073_at   | 0.8941 |
| HMGA2 | ZBED3         | 1422851_at | 1452088_at   | 0.9411 |
| HMGA2 | RRP1B         | 1422851_at | 1452119_at   | 0.8893 |
| HMGA2 | NOVA1         | 1422851_at | 1452245_at   | 0.8688 |
| HMGA2 | ASPM          | 1422851_at | 1452459_at   | 0.9077 |
| HMGA2 | AAK1          | 1422851_at | 1452632_at   | 0.8143 |
| HMGA2 | MLF1IP        | 1422851_at | 1452816_at   | 0.9185 |
| HMGA2 | TTF2          | 1422851_at | 1452818_at   | 0.9294 |
| HMGA2 | TMEM138       | 1422851_at | 1452978_at   | 0.8866 |
| HMGA2 | RHOBTB3       | 1422851_at | 1453227_at   | 0.8904 |
| HMGA2 | HELLS         | 1422851_at | 1453361_at   | 0.9005 |
| HMGA2 | TROAP         | 1422851_at | 1453370_at   | 0.9423 |
| HMGA2 | CEP55         | 1422851_at | 1453683_a_at | 0.9568 |
| HMGA2 | DHX38         | 1422851_at | 1453751_at   | 0.8420 |
| HMGA2 | PHF6          | 1422851_at | 1453761_at   | 0.9498 |
| HMGA2 | FAM110A       | 1422851_at | 1453768_a_at | 0.8197 |
| HMGA2 | NETO2         | 1422851_at | 1454032_at   | 0.8510 |
| HMGA2 | CCDC77        | 1422851_at | 1454228_a_at | 0.9625 |
| HMGA2 | EXOD1         | 1422851_at | 1454229_a_at | 0.9293 |
| HMGA2 | UTP23         | 1422851_at | 1455259_a_at | 0.9287 |
| HMGA2 | IER5L         | 1422851_at | 1455881_at   | 0.8203 |
| HMGA2 | 2700049P18RIK | 1422851_at | 1456163_at   | 0.9204 |
| HMGA2 | RTEL1         | 1422851_at | 1456729_x_at | 0.8585 |
| HMGA2 | BB053540      | 1422851_at | 1456840_at   | 0.8019 |
| HMGA2 | AV254764      | 1422851_at | 1456951_at   | 0.9648 |

|         |               |            |              |        |
|---------|---------------|------------|--------------|--------|
| HMGA2   | NETO2         | 1422851_at | 1457344_at   | 0.8141 |
| HMGA2   | TAF2          | 1422851_at | 1457351_at   | 0.9223 |
| HMGA2   | ETAA1         | 1422851_at | 1457882_at   | 0.8501 |
| HMGA2   | ZNF69         | 1422851_at | 1458274_at   | 0.8338 |
| HMGA2   | MTR           | 1422851_at | 1458532_at   | 0.8722 |
| HMGA2   | RNF219        | 1422851_at | 1458636_at   | 0.9363 |
| HMGA2   | BB463474      | 1422851_at | 1458902_at   | 0.9468 |
| HMGA2   | BB527979      | 1422851_at | 1459950_at   | 0.8016 |
| HMGA2   | AA763515      | 1422851_at | 1460065_at   | 0.9107 |
| SUV39H2 | RAD51C        | 1422979_at | 1423026_at   | 0.9677 |
| SUV39H2 | INCENP        | 1422979_at | 1423093_at   | 0.9422 |
| SUV39H2 | RAD18         | 1422979_at | 1423318_at   | 0.8794 |
| SUV39H2 | SMARCC1       | 1422979_at | 1423417_at   | 0.9594 |
| SUV39H2 | D2ERTD750E    | 1422979_at | 1423464_at   | 0.9402 |
| SUV39H2 | SEPT2         | 1422979_at | 1423473_at   | 0.9185 |
| SUV39H2 | MASTL         | 1422979_at | 1423524_at   | 0.9644 |
| SUV39H2 | MASTL         | 1422979_at | 1423525_at   | 0.9415 |
| SUV39H2 | KCNC1         | 1422979_at | 1423559_at   | 0.8740 |
| SUV39H2 | TMEM48        | 1422979_at | 1424173_at   | 0.9758 |
| SUV39H2 | CAMKK2        | 1422979_at | 1424476_at   | 0.8136 |
| SUV39H2 | HIP1          | 1422979_at | 1424756_at   | 0.9526 |
| SUV39H2 | WDR62         | 1422979_at | 1424849_at   | 0.9055 |
| SUV39H2 | ATP6V0A1      | 1422979_at | 1425227_a_at | 0.8046 |
| SUV39H2 | HUS1          | 1422979_at | 1425366_a_at | 0.9192 |
| SUV39H2 | PSRC1         | 1422979_at | 1425416_s_at | 0.9412 |
| SUV39H2 | MARK1         | 1422979_at | 1425509_at   | 0.8065 |
| SUV39H2 | CD109         | 1422979_at | 1425658_at   | 0.9642 |
| SUV39H2 | CCDC77        | 1422979_at | 1425734_a_at | 0.9349 |
| SUV39H2 | FANCI         | 1422979_at | 1425941_a_at | 0.9453 |
| SUV39H2 | CDC7          | 1422979_at | 1426021_a_at | 0.9625 |
| SUV39H2 | PVT1          | 1422979_at | 1427140_at   | 0.9339 |
| SUV39H2 | RG9MTD2       | 1422979_at | 1427375_at   | 0.9580 |
| SUV39H2 | FANCI         | 1422979_at | 1427953_at   | 0.9373 |
| SUV39H2 | SRGAP2        | 1422979_at | 1427967_at   | 0.9443 |
| SUV39H2 | CAND1         | 1422979_at | 1428649_at   | 0.9589 |
| SUV39H2 | ZNF157        | 1422979_at | 1428887_at   | 0.8925 |
| SUV39H2 | RASL11A       | 1422979_at | 1429444_at   | 0.8146 |
| SUV39H2 | MCM8          | 1422979_at | 1429557_at   | 0.8785 |
| SUV39H2 | SMC2          | 1422979_at | 1429659_at   | 0.9431 |
| SUV39H2 | 6230416J20RIK | 1422979_at | 1429665_at   | 0.9041 |
| SUV39H2 | 4632434I11RIK | 1422979_at | 1429734_at   | 0.9513 |
| SUV39H2 | HELLS         | 1422979_at | 1430139_at   | 0.9198 |
| SUV39H2 | CEP70         | 1422979_at | 1430231_a_at | 0.9545 |
| SUV39H2 | NUP205        | 1422979_at | 1430343_at   | 0.9157 |
| SUV39H2 | NCAPD3        | 1422979_at | 1430782_at   | 0.8765 |
| SUV39H2 | TGIF2         | 1422979_at | 1431115_at   | 0.8761 |
| SUV39H2 | PGAP1         | 1422979_at | 1431169_at   | 0.9283 |
| SUV39H2 | DLG5          | 1422979_at | 1431187_s_at | 0.9079 |
| SUV39H2 | PVT1          | 1422979_at | 1431352_s_at | 0.8875 |
| SUV39H2 | 4933432K03RIK | 1422979_at | 1431489_at   | 0.8687 |
| SUV39H2 | 2610021K21RIK | 1422979_at | 1431667_s_at | 0.9201 |

|         |               |            |              |        |
|---------|---------------|------------|--------------|--------|
| SUV39H2 | RAB31         | 1422979_at | 1431691_a_at | 0.8660 |
| SUV39H2 | PIGN          | 1422979_at | 1432115_a_at | 0.9596 |
| SUV39H2 | ERCC4         | 1422979_at | 1432272_a_at | 0.9454 |
| SUV39H2 | ARMC9         | 1422979_at | 1432383_a_at | 0.9291 |
| SUV39H2 | 1700106N22RIK | 1422979_at | 1432504_at   | 0.9002 |
| SUV39H2 | NPHP4         | 1422979_at | 1434024_at   | 0.9156 |
| SUV39H2 | SRGAP2        | 1422979_at | 1434407_at   | 0.9290 |
| SUV39H2 | EXOD1         | 1422979_at | 1435390_at   | 0.8297 |
| SUV39H2 | GEMIN5        | 1422979_at | 1436311_at   | 0.8004 |
| SUV39H2 | CD109         | 1422979_at | 1436346_at   | 0.9536 |
| SUV39H2 | CEP78         | 1422979_at | 1436352_at   | 0.8832 |
| SUV39H2 | ZBTB12        | 1422979_at | 1436382_at   | 0.9207 |
| SUV39H2 | SDC3          | 1422979_at | 1436482_a_at | 0.8272 |
| SUV39H2 | PIF1          | 1422979_at | 1436738_at   | 0.8782 |
| SUV39H2 | SOX11         | 1422979_at | 1436790_a_at | 0.9265 |
| SUV39H2 | 4922501L14RIK | 1422979_at | 1436969_at   | 0.8072 |
| SUV39H2 | ASCL1         | 1422979_at | 1437086_at   | 0.8160 |
| SUV39H2 | 2810408I11RIK | 1422979_at | 1437549_at   | 0.9485 |
| SUV39H2 | AV164956      | 1422979_at | 1437673_at   | 0.8985 |
| SUV39H2 | HEATR5B       | 1422979_at | 1438085_at   | 0.8928 |
| SUV39H2 | 4933432K03RIK | 1422979_at | 1438356_x_at | 0.9521 |
| SUV39H2 | RAD51C        | 1422979_at | 1438453_at   | 0.9335 |
| SUV39H2 | DHX33         | 1422979_at | 1438765_at   | 0.9589 |
| SUV39H2 | AH11          | 1422979_at | 1439083_at   | 0.9494 |
| SUV39H2 | FANCD2        | 1422979_at | 1439091_at   | 0.9105 |
| SUV39H2 | AI506816      | 1422979_at | 1439483_at   | 0.9462 |
| SUV39H2 | AI746468      | 1422979_at | 1439960_at   | 0.9385 |
| SUV39H2 | ABCC12        | 1422979_at | 1439985_at   | 0.8562 |
| SUV39H2 | A930024E05RIK | 1422979_at | 1440206_at   | 0.9270 |
| SUV39H2 | WDR35         | 1422979_at | 1440318_at   | 0.8730 |
| SUV39H2 | KIF20B        | 1422979_at | 1440924_at   | 0.9215 |
| SUV39H2 | A430071A18RIK | 1422979_at | 1441113_at   | 0.8377 |
| SUV39H2 | MATR3         | 1422979_at | 1441272_at   | 0.9171 |
| SUV39H2 | KBTBD8        | 1422979_at | 1441275_at   | 0.9513 |
| SUV39H2 | NKRF          | 1422979_at | 1441325_at   | 0.9552 |
| SUV39H2 | AU043080      | 1422979_at | 1441375_at   | 0.9302 |
| SUV39H2 | ASPM          | 1422979_at | 1441520_at   | 0.8827 |
| SUV39H2 | D2ERTD750E    | 1422979_at | 1442280_at   | 0.8424 |
| SUV39H2 | TAF1D         | 1422979_at | 1442289_at   | 0.8654 |
| SUV39H2 | NUP188        | 1422979_at | 1442314_at   | 0.8319 |
| SUV39H2 | TTK           | 1422979_at | 1442594_at   | 0.9648 |
| SUV39H2 | AW545941      | 1422979_at | 1443007_at   | 0.8214 |
| SUV39H2 | BB337104      | 1422979_at | 1443026_at   | 0.8371 |
| SUV39H2 | BB444561      | 1422979_at | 1443171_at   | 0.9453 |
| SUV39H2 | BB130444      | 1422979_at | 1443410_at   | 0.8424 |
| SUV39H2 | BM202761      | 1422979_at | 1443800_at   | 0.8441 |
| SUV39H2 | ZBTB39        | 1422979_at | 1443880_at   | 0.9081 |
| SUV39H2 | CDK5RAP2      | 1422979_at | 1443976_at   | 0.8547 |
| SUV39H2 | ERCC6L        | 1422979_at | 1444024_at   | 0.9671 |
| SUV39H2 | AV228095      | 1422979_at | 1444443_at   | 0.9515 |
| SUV39H2 | 6530418L21RIK | 1422979_at | 1444723_at   | 0.9030 |

|         |               |            |              |        |
|---------|---------------|------------|--------------|--------|
| SUV39H2 | MASTL         | 1422979_at | 1444725_at   | 0.8987 |
| SUV39H2 | BC023969      | 1422979_at | 1445226_at   | 0.9615 |
| SUV39H2 | C530044C16RIK | 1422979_at | 1445247_at   | 0.8431 |
| SUV39H2 | AV323315      | 1422979_at | 1445298_at   | 0.8781 |
| SUV39H2 | 9330118A15RIK | 1422979_at | 1446612_at   | 0.8240 |
| SUV39H2 | KCND3         | 1422979_at | 1447513_at   | 0.9646 |
| SUV39H2 | SEMA6D        | 1422979_at | 1448060_at   | 0.8615 |
| SUV39H2 | OGG1          | 1422979_at | 1448815_at   | 0.9097 |
| SUV39H2 | FOXM1         | 1422979_at | 1448834_at   | 0.9148 |
| SUV39H2 | SKP2          | 1422979_at | 1449293_a_at | 0.9677 |
| SUV39H2 | SOX4          | 1422979_at | 1449370_at   | 0.8883 |
| SUV39H2 | SUPT16H       | 1422979_at | 1449578_at   | 0.9769 |
| SUV39H2 | CCNB1         | 1422979_at | 1449675_at   | 0.9586 |
| SUV39H2 | LFNG          | 1422979_at | 1449943_at   | 0.8528 |
| SUV39H2 | APC           | 1422979_at | 1450056_at   | 0.8456 |
| SUV39H2 | 4933411K20RIK | 1422979_at | 1450076_at   | 0.9641 |
| SUV39H2 | TCERG1        | 1422979_at | 1450100_a_at | 0.9692 |
| SUV39H2 | ASCL1         | 1422979_at | 1450164_at   | 0.9258 |
| SUV39H2 | ZFP354C       | 1422979_at | 1450321_at   | 0.8797 |
| SUV39H2 | SHC3          | 1422979_at | 1450326_at   | 0.8185 |
| SUV39H2 | MYBL1         | 1422979_at | 1450481_at   | 0.9213 |
| SUV39H2 | SOX3          | 1422979_at | 1450485_at   | 0.9275 |
| SUV39H2 | SALL1         | 1422979_at | 1450489_at   | 0.8134 |
| SUV39H2 | HMGA2         | 1422979_at | 1450780_s_at | 0.8941 |
| SUV39H2 | HMGA2         | 1422979_at | 1450781_at   | 0.8067 |
| SUV39H2 | ZNF451        | 1422979_at | 1451816_at   | 0.9053 |
| SUV39H2 | NCOR2         | 1422979_at | 1451841_a_at | 0.9092 |
| SUV39H2 | LMNB2         | 1422979_at | 1451849_a_at | 0.8621 |
| SUV39H2 | ZFP2          | 1422979_at | 1452025_a_at | 0.9200 |
| SUV39H2 | 6720460F02RIK | 1422979_at | 1452073_at   | 0.9081 |
| SUV39H2 | ZBED3         | 1422979_at | 1452088_at   | 0.8601 |
| SUV39H2 | RRP1B         | 1422979_at | 1452119_at   | 0.8856 |
| SUV39H2 | NOVA1         | 1422979_at | 1452245_at   | 0.8344 |
| SUV39H2 | PVT1          | 1422979_at | 1452324_at   | 0.8464 |
| SUV39H2 | CENPF         | 1422979_at | 1452334_at   | 0.8877 |
| SUV39H2 | ASPM          | 1422979_at | 1452459_at   | 0.9330 |
| SUV39H2 | MLF1IP        | 1422979_at | 1452816_at   | 0.8881 |
| SUV39H2 | TTF2          | 1422979_at | 1452818_at   | 0.9027 |
| SUV39H2 | TMEM138       | 1422979_at | 1452978_at   | 0.8676 |
| SUV39H2 | RHOBTB3       | 1422979_at | 1453227_at   | 0.9614 |
| SUV39H2 | CALR3         | 1422979_at | 1453232_at   | 0.8000 |
| SUV39H2 | HELLS         | 1422979_at | 1453361_at   | 0.8273 |
| SUV39H2 | TROAP         | 1422979_at | 1453370_at   | 0.9559 |
| SUV39H2 | CEP55         | 1422979_at | 1453683_a_at | 0.9627 |
| SUV39H2 | DHX38         | 1422979_at | 1453751_at   | 0.9276 |
| SUV39H2 | PHF6          | 1422979_at | 1453761_at   | 0.9657 |
| SUV39H2 | FAM110A       | 1422979_at | 1453768_a_at | 0.8287 |
| SUV39H2 | NETO2         | 1422979_at | 1454032_at   | 0.9250 |
| SUV39H2 | CCDC77        | 1422979_at | 1454228_a_at | 0.9350 |
| SUV39H2 | EXOD1         | 1422979_at | 1454229_a_at | 0.9633 |
| SUV39H2 | UTP23         | 1422979_at | 1455259_a_at | 0.9475 |

|         |                       |            |                       |        |
|---------|-----------------------|------------|-----------------------|--------|
| SUV39H2 | ATP5G2                | 1422979_at | 1456128_at            | 0.8033 |
| SUV39H2 | 2700049P18RIK         | 1422979_at | 1456163_at            | 0.9254 |
| SUV39H2 | RTEL1                 | 1422979_at | 1456729_x_at          | 0.8583 |
| SUV39H2 | BB053540              | 1422979_at | 1456840_at            | 0.8304 |
| SUV39H2 | AV254764              | 1422979_at | 1456951_at            | 0.8835 |
| SUV39H2 | PLDN                  | 1422979_at | 1457088_at            | 0.8047 |
| SUV39H2 | TAF2                  | 1422979_at | 1457351_at            | 0.9579 |
| SUV39H2 | ZNF69                 | 1422979_at | 1458274_at            | 0.8598 |
| SUV39H2 | MTR                   | 1422979_at | 1458532_at            | 0.8811 |
| SUV39H2 | RNF219                | 1422979_at | 1458636_at            | 0.9591 |
| SUV39H2 | BB463474              | 1422979_at | 1458902_at            | 0.8428 |
| SUV39H2 | 6530418L21RIK         | 1422979_at | 1459051_at            | 0.8233 |
| SUV39H2 | AFFX-DapX-5_at        | 1422979_at | AFFX-DapX-5_at        | 0.8422 |
| SUV39H2 | AFFX-LysX-5_at        | 1422979_at | AFFX-LysX-5_at        | 0.8246 |
| SUV39H2 | AFFX-r2-Bs-dap-5_at   | 1422979_at | AFFX-r2-Bs-dap-5_at   | 0.8217 |
| SUV39H2 | AFFX-r2-Bs-lys-5_at   | 1422979_at | AFFX-r2-Bs-lys-5_at   | 0.8401 |
| SUV39H2 | AFFX-r2-Bs-thr-5_s_at | 1422979_at | AFFX-r2-Bs-thr-5_s_at | 0.8339 |
| SUV39H2 | AFFX-ThrX-5_at        | 1422979_at | AFFX-ThrX-5_at        | 0.8468 |
| RAD51C  | INCENP                | 1423026_at | 1423093_at            | 0.9562 |
| RAD51C  | RAD18                 | 1423026_at | 1423318_at            | 0.8833 |
| RAD51C  | SMARCC1               | 1423026_at | 1423417_at            | 0.9394 |
| RAD51C  | D2ERTD750E            | 1423026_at | 1423464_at            | 0.9720 |
| RAD51C  | SEPT2                 | 1423026_at | 1423473_at            | 0.9380 |
| RAD51C  | MASTL                 | 1423026_at | 1423524_at            | 0.9944 |
| RAD51C  | MASTL                 | 1423026_at | 1423525_at            | 0.9743 |
| RAD51C  | KCNC1                 | 1423026_at | 1423559_at            | 0.8682 |
| RAD51C  | TMEM48                | 1423026_at | 1424173_at            | 0.9830 |
| RAD51C  | CAMKK2                | 1423026_at | 1424476_at            | 0.8182 |
| RAD51C  | HIP1                  | 1423026_at | 1424756_at            | 0.9835 |
| RAD51C  | WDR62                 | 1423026_at | 1424849_at            | 0.9368 |
| RAD51C  | ATP6V0A1              | 1423026_at | 1425227_a_at          | 0.8465 |
| RAD51C  | HUS1                  | 1423026_at | 1425366_a_at          | 0.9468 |
| RAD51C  | PSRC1                 | 1423026_at | 1425416_s_at          | 0.9790 |
| RAD51C  | CD109                 | 1423026_at | 1425658_at            | 0.9887 |
| RAD51C  | CCDC77                | 1423026_at | 1425734_a_at          | 0.9624 |
| RAD51C  | FANCI                 | 1423026_at | 1425941_a_at          | 0.9759 |
| RAD51C  | CDC7                  | 1423026_at | 1426021_a_at          | 0.9815 |
| RAD51C  | PVT1                  | 1423026_at | 1427140_at            | 0.8923 |
| RAD51C  | RG9MTD2               | 1423026_at | 1427375_at            | 0.9532 |
| RAD51C  | FANCI                 | 1423026_at | 1427953_at            | 0.9696 |
| RAD51C  | SRGAP2                | 1423026_at | 1427967_at            | 0.9788 |
| RAD51C  | CAND1                 | 1423026_at | 1428649_at            | 0.9665 |
| RAD51C  | ZNF157                | 1423026_at | 1428887_at            | 0.9339 |
| RAD51C  | RASL11A               | 1423026_at | 1429444_at            | 0.8622 |
| RAD51C  | SPDYA                 | 1423026_at | 1429470_at            | 0.8040 |
| RAD51C  | MCM8                  | 1423026_at | 1429557_at            | 0.9078 |
| RAD51C  | SMC2                  | 1423026_at | 1429659_at            | 0.9715 |
| RAD51C  | 6230416J20RIK         | 1423026_at | 1429665_at            | 0.9290 |
| RAD51C  | 4632434I11RIK         | 1423026_at | 1429734_at            | 0.9777 |
| RAD51C  | HELLS                 | 1423026_at | 1430139_at            | 0.9156 |
| RAD51C  | CEP70                 | 1423026_at | 1430231_a_at          | 0.9790 |

|        |               |            |              |        |
|--------|---------------|------------|--------------|--------|
| RAD51C | NUP205        | 1423026_at | 1430343_at   | 0.9432 |
| RAD51C | TLE4          | 1423026_at | 1430384_at   | 0.8292 |
| RAD51C | NCAPD3        | 1423026_at | 1430782_at   | 0.9111 |
| RAD51C | TGIF2         | 1423026_at | 1431115_at   | 0.9047 |
| RAD51C | PGAP1         | 1423026_at | 1431169_at   | 0.9526 |
| RAD51C | DLG5          | 1423026_at | 1431187_s_at | 0.9287 |
| RAD51C | PVT1          | 1423026_at | 1431352_s_at | 0.9000 |
| RAD51C | JAM2          | 1423026_at | 1431416_a_at | 0.8583 |
| RAD51C | 4933432K03RIK | 1423026_at | 1431489_at   | 0.8753 |
| RAD51C | 2610021K21RIK | 1423026_at | 1431667_s_at | 0.9462 |
| RAD51C | RAB31         | 1423026_at | 1431691_a_at | 0.9205 |
| RAD51C | PIGN          | 1423026_at | 1432115_a_at | 0.9836 |
| RAD51C | ERCC4         | 1423026_at | 1432272_a_at | 0.9814 |
| RAD51C | ARMC9         | 1423026_at | 1432383_a_at | 0.9655 |
| RAD51C | 1700106N22RIK | 1423026_at | 1432504_at   | 0.9244 |
| RAD51C | SUV39H2       | 1423026_at | 1433996_at   | 0.9291 |
| RAD51C | NPHP4         | 1423026_at | 1434024_at   | 0.9422 |
| RAD51C | SRGAP2        | 1423026_at | 1434407_at   | 0.9039 |
| RAD51C | EXOD1         | 1423026_at | 1435390_at   | 0.8832 |
| RAD51C | CD109         | 1423026_at | 1436346_at   | 0.9749 |
| RAD51C | CEP78         | 1423026_at | 1436352_at   | 0.8705 |
| RAD51C | ZBTB12        | 1423026_at | 1436382_at   | 0.9337 |
| RAD51C | SDC3          | 1423026_at | 1436482_a_at | 0.8323 |
| RAD51C | PIF1          | 1423026_at | 1436738_at   | 0.8953 |
| RAD51C | SOX11         | 1423026_at | 1436790_a_at | 0.8996 |
| RAD51C | ASCL1         | 1423026_at | 1437086_at   | 0.8679 |
| RAD51C | 2810408I11RIK | 1423026_at | 1437549_at   | 0.9689 |
| RAD51C | AV164956      | 1423026_at | 1437673_at   | 0.9272 |
| RAD51C | HEATR1        | 1423026_at | 1437965_at   | 0.8056 |
| RAD51C | HEATR5B       | 1423026_at | 1438085_at   | 0.9336 |
| RAD51C | 4933432K03RIK | 1423026_at | 1438356_x_at | 0.9812 |
| RAD51C | DHX33         | 1423026_at | 1438765_at   | 0.9815 |
| RAD51C | AH11          | 1423026_at | 1439083_at   | 0.8907 |
| RAD51C | FANCD2        | 1423026_at | 1439091_at   | 0.9333 |
| RAD51C | AI506816      | 1423026_at | 1439483_at   | 0.9822 |
| RAD51C | AI746468      | 1423026_at | 1439960_at   | 0.9602 |
| RAD51C | ABCC12        | 1423026_at | 1439985_at   | 0.8815 |
| RAD51C | A930024E05RIK | 1423026_at | 1440206_at   | 0.9672 |
| RAD51C | WDR35         | 1423026_at | 1440318_at   | 0.8207 |
| RAD51C | KIF20B        | 1423026_at | 1440924_at   | 0.9405 |
| RAD51C | A430071A18RIK | 1423026_at | 1441113_at   | 0.8428 |
| RAD51C | MATR3         | 1423026_at | 1441272_at   | 0.9299 |
| RAD51C | KBTBD8        | 1423026_at | 1441275_at   | 0.9763 |
| RAD51C | NKRF          | 1423026_at | 1441325_at   | 0.9823 |
| RAD51C | AU043080      | 1423026_at | 1441375_at   | 0.9609 |
| RAD51C | ASPM          | 1423026_at | 1441520_at   | 0.9247 |
| RAD51C | D2ERTD750E    | 1423026_at | 1442280_at   | 0.8801 |
| RAD51C | TAF1D         | 1423026_at | 1442289_at   | 0.8784 |
| RAD51C | NUP188        | 1423026_at | 1442314_at   | 0.8629 |
| RAD51C | TTK           | 1423026_at | 1442594_at   | 0.9966 |
| RAD51C | AW545941      | 1423026_at | 1443007_at   | 0.8582 |

|        |               |            |              |        |
|--------|---------------|------------|--------------|--------|
| RAD51C | BB337104      | 1423026_at | 1443026_at   | 0.8701 |
| RAD51C | BB444561      | 1423026_at | 1443171_at   | 0.9649 |
| RAD51C | BB340127      | 1423026_at | 1443230_at   | 0.8119 |
| RAD51C | BB130444      | 1423026_at | 1443410_at   | 0.8773 |
| RAD51C | BM202761      | 1423026_at | 1443800_at   | 0.8564 |
| RAD51C | ZBTB39        | 1423026_at | 1443880_at   | 0.9425 |
| RAD51C | CDK5RAP2      | 1423026_at | 1443976_at   | 0.8988 |
| RAD51C | ERCC6L        | 1423026_at | 1444024_at   | 0.9952 |
| RAD51C | AV228095      | 1423026_at | 1444443_at   | 0.9718 |
| RAD51C | 6530418L21RIK | 1423026_at | 1444723_at   | 0.9456 |
| RAD51C | MASTL         | 1423026_at | 1444725_at   | 0.9178 |
| RAD51C | BC023969      | 1423026_at | 1445226_at   | 0.9863 |
| RAD51C | C530044C16RIK | 1423026_at | 1445247_at   | 0.8567 |
| RAD51C | AV323315      | 1423026_at | 1445298_at   | 0.9189 |
| RAD51C | KCND3         | 1423026_at | 1447513_at   | 0.9936 |
| RAD51C | SEMA6D        | 1423026_at | 1448060_at   | 0.9127 |
| RAD51C | OGG1          | 1423026_at | 1448815_at   | 0.9434 |
| RAD51C | FOXM1         | 1423026_at | 1448834_at   | 0.9424 |
| RAD51C | SKP2          | 1423026_at | 1449293_a_at | 0.9963 |
| RAD51C | SOX4          | 1423026_at | 1449370_at   | 0.8550 |
| RAD51C | SUPT16H       | 1423026_at | 1449578_at   | 0.9442 |
| RAD51C | CCNB1         | 1423026_at | 1449675_at   | 0.9842 |
| RAD51C | LFNG          | 1423026_at | 1449943_at   | 0.8902 |
| RAD51C | APC           | 1423026_at | 1450056_at   | 0.8832 |
| RAD51C | 4933411K20RIK | 1423026_at | 1450076_at   | 0.9900 |
| RAD51C | TCERG1        | 1423026_at | 1450100_a_at | 0.9833 |
| RAD51C | ASCL1         | 1423026_at | 1450164_at   | 0.9675 |
| RAD51C | PCDHB11       | 1423026_at | 1450270_at   | 0.8241 |
| RAD51C | ZFP354C       | 1423026_at | 1450321_at   | 0.9184 |
| RAD51C | SHC3          | 1423026_at | 1450326_at   | 0.8544 |
| RAD51C | MYBL1         | 1423026_at | 1450481_at   | 0.9379 |
| RAD51C | SOX3          | 1423026_at | 1450485_at   | 0.9579 |
| RAD51C | SALL1         | 1423026_at | 1450489_at   | 0.8331 |
| RAD51C | HMGA2         | 1423026_at | 1450780_s_at | 0.9167 |
| RAD51C | HMGA2         | 1423026_at | 1450781_at   | 0.8091 |
| RAD51C | ZNF451        | 1423026_at | 1451816_at   | 0.9118 |
| RAD51C | NCOR2         | 1423026_at | 1451841_a_at | 0.9521 |
| RAD51C | LMNB2         | 1423026_at | 1451849_a_at | 0.8913 |
| RAD51C | ZFP2          | 1423026_at | 1452025_a_at | 0.9480 |
| RAD51C | 6720460F02RIK | 1423026_at | 1452073_at   | 0.9436 |
| RAD51C | ZBED3         | 1423026_at | 1452088_at   | 0.8656 |
| RAD51C | RRP1B         | 1423026_at | 1452119_at   | 0.9203 |
| RAD51C | NOVA1         | 1423026_at | 1452245_at   | 0.8821 |
| RAD51C | PVT1          | 1423026_at | 1452324_at   | 0.8177 |
| RAD51C | CENPF         | 1423026_at | 1452334_at   | 0.9384 |
| RAD51C | ADAMTS7       | 1423026_at | 1452339_at   | 0.8295 |
| RAD51C | ASPM          | 1423026_at | 1452459_at   | 0.9733 |
| RAD51C | AAK1          | 1423026_at | 1452632_at   | 0.8085 |
| RAD51C | MLF1IP        | 1423026_at | 1452816_at   | 0.8996 |
| RAD51C | TTF2          | 1423026_at | 1452818_at   | 0.9444 |
| RAD51C | TMEM138       | 1423026_at | 1452978_at   | 0.8937 |

|         |                       |              |                       |        |
|---------|-----------------------|--------------|-----------------------|--------|
| RAD51C  | RHOBTB3               | 1423026_at   | 1453227_at            | 0.9932 |
| RAD51C  | CALR3                 | 1423026_at   | 1453232_at            | 0.8481 |
| RAD51C  | HELLS                 | 1423026_at   | 1453361_at            | 0.8339 |
| RAD51C  | TROAP                 | 1423026_at   | 1453370_at            | 0.9769 |
| RAD51C  | CEP55                 | 1423026_at   | 1453683_a_at          | 0.9859 |
| RAD51C  | DHX38                 | 1423026_at   | 1453751_at            | 0.9610 |
| RAD51C  | PHF6                  | 1423026_at   | 1453761_at            | 0.9898 |
| RAD51C  | FAM110A               | 1423026_at   | 1453768_a_at          | 0.8657 |
| RAD51C  | NETO2                 | 1423026_at   | 1454032_at            | 0.9002 |
| RAD51C  | CCDC77                | 1423026_at   | 1454228_a_at          | 0.9437 |
| RAD51C  | EXOD1                 | 1423026_at   | 1454229_a_at          | 0.9967 |
| RAD51C  | XKR5                  | 1423026_at   | 1455127_at            | 0.8253 |
| RAD51C  | UTP23                 | 1423026_at   | 1455259_a_at          | 0.9747 |
| RAD51C  | ATP5G2                | 1423026_at   | 1456128_at            | 0.8402 |
| RAD51C  | 2700049P18RIK         | 1423026_at   | 1456163_at            | 0.9519 |
| RAD51C  | RTEL1                 | 1423026_at   | 1456729_x_at          | 0.8641 |
| RAD51C  | BB053540              | 1423026_at   | 1456840_at            | 0.8637 |
| RAD51C  | AV254764              | 1423026_at   | 1456951_at            | 0.9001 |
| RAD51C  | NETO2                 | 1423026_at   | 1457344_at            | 0.8007 |
| RAD51C  | TAF2                  | 1423026_at   | 1457351_at            | 0.9840 |
| RAD51C  | ZNF69                 | 1423026_at   | 1458274_at            | 0.8905 |
| RAD51C  | MTR                   | 1423026_at   | 1458532_at            | 0.8729 |
| RAD51C  | RNF219                | 1423026_at   | 1458636_at            | 0.9887 |
| RAD51C  | BB463474              | 1423026_at   | 1458902_at            | 0.8488 |
| RAD51C  | 6530418L21RIK         | 1423026_at   | 1459051_at            | 0.8772 |
| RAD51C  | BB527979              | 1423026_at   | 1459950_at            | 0.8157 |
| RAD51C  | AFFX-DapX-5_at        | 1423026_at   | AFFX-DapX-5_at        | 0.9185 |
| RAD51C  | AFFX-LysX-5_at        | 1423026_at   | AFFX-LysX-5_at        | 0.8862 |
| RAD51C  | AFFX-r2-Bs-dap-5_at   | 1423026_at   | AFFX-r2-Bs-dap-5_at   | 0.9087 |
| RAD51C  | AFFX-r2-Bs-lys-5_at   | 1423026_at   | AFFX-r2-Bs-lys-5_at   | 0.9065 |
| RAD51C  | AFFX-r2-Bs-thr-5_s_at | 1423026_at   | AFFX-r2-Bs-thr-5_s_at | 0.8940 |
| RAD51C  | AFFX-ThrX-5_at        | 1423026_at   | AFFX-ThrX-5_at        | 0.9001 |
| RAD18   | INCENP                | 1423318_at   | 1423093_at            | 0.9567 |
| SMARCC1 | INCENP                | 1423417_at   | 1423093_at            | 0.9253 |
| HIP1    | INCENP                | 1424756_at   | 1423093_at            | 0.9542 |
| PSRC1   | INCENP                | 1425416_s_at | 1423093_at            | 0.8938 |
| PEG10   | INCENP                | 1427550_at   | 1423093_at            | 0.8615 |
| CAND1   | INCENP                | 1428649_at   | 1423093_at            | 0.9483 |
| ZNF157  | INCENP                | 1428887_at   | 1423093_at            | 0.8367 |
| MCM8    | INCENP                | 1429557_at   | 1423093_at            | 0.9212 |
| HELLS   | INCENP                | 1430139_at   | 1423093_at            | 0.9078 |
| TGIF2   | INCENP                | 1431115_at   | 1423093_at            | 0.9107 |
| ERCC4   | INCENP                | 1432272_a_at | 1423093_at            | 0.9184 |
| SUV39H2 | INCENP                | 1433996_at   | 1423093_at            | 0.9318 |
| PIF1    | INCENP                | 1436738_at   | 1423093_at            | 0.9445 |
| SOX11   | INCENP                | 1436790_a_at | 1423093_at            | 0.8254 |
| ASCL1   | INCENP                | 1437086_at   | 1423093_at            | 0.8128 |
| RAD51C  | INCENP                | 1438453_at   | 1423093_at            | 0.9080 |
| NKRF    | INCENP                | 1441325_at   | 1423093_at            | 0.9709 |
| TAF1D   | INCENP                | 1442289_at   | 1423093_at            | 0.9485 |
| FOXM1   | INCENP                | 1448834_at   | 1423093_at            | 0.9028 |



|         |               |              |              |        |
|---------|---------------|--------------|--------------|--------|
| SUPT16H | INCENP        | 1449578_at   | 1423093_at   | 0.9330 |
| TCERG1  | INCENP        | 1450100_a_at | 1423093_at   | 0.9624 |
| ASCL1   | INCENP        | 1450164_at   | 1423093_at   | 0.9053 |
| ZFP354C | INCENP        | 1450321_at   | 1423093_at   | 0.8385 |
| MED1    | INCENP        | 1450402_at   | 1423093_at   | 0.8899 |
| MYBL1   | INCENP        | 1450481_at   | 1423093_at   | 0.9718 |
| SOX3    | INCENP        | 1450485_at   | 1423093_at   | 0.9416 |
| SALL1   | INCENP        | 1450489_at   | 1423093_at   | 0.8621 |
| HMGA2   | INCENP        | 1450780_s_at | 1423093_at   | 0.9563 |
| HMGA2   | INCENP        | 1450781_at   | 1423093_at   | 0.9037 |
| ZNF451  | INCENP        | 1451816_at   | 1423093_at   | 0.9818 |
| NCOR2   | INCENP        | 1451841_a_at | 1423093_at   | 0.8757 |
| ZFP2    | INCENP        | 1452025_a_at | 1423093_at   | 0.8870 |
| ZBED3   | INCENP        | 1452088_at   | 1423093_at   | 0.9464 |
| CENPF   | INCENP        | 1452334_at   | 1423093_at   | 0.8183 |
| MLF1IP  | INCENP        | 1452816_at   | 1423093_at   | 0.9567 |
| TTF2    | INCENP        | 1452818_at   | 1423093_at   | 0.9561 |
| HELLS   | INCENP        | 1453361_at   | 1423093_at   | 0.9347 |
| PHF6    | INCENP        | 1453761_at   | 1423093_at   | 0.9711 |
| TAF2    | INCENP        | 1457351_at   | 1423093_at   | 0.9696 |
| ZNF69   | INCENP        | 1458274_at   | 1423093_at   | 0.8805 |
| RAD18   | SMARCC1       | 1423318_at   | 1423417_at   | 0.8643 |
| RAD18   | D2ERTD750E    | 1423318_at   | 1423464_at   | 0.8592 |
| RAD18   | SEPT2         | 1423318_at   | 1423473_at   | 0.8410 |
| RAD18   | MASTL         | 1423318_at   | 1423524_at   | 0.8986 |
| RAD18   | MASTL         | 1423318_at   | 1423525_at   | 0.8643 |
| RAD18   | TMEM48        | 1423318_at   | 1424173_at   | 0.8803 |
| RAD18   | CAMKK2        | 1423318_at   | 1424476_at   | 0.9638 |
| RAD18   | HIP1          | 1423318_at   | 1424756_at   | 0.8684 |
| RAD18   | WDR62         | 1423318_at   | 1424849_at   | 0.8850 |
| RAD18   | HUS1          | 1423318_at   | 1425366_a_at | 0.8667 |
| RAD18   | CD109         | 1423318_at   | 1425658_at   | 0.9191 |
| RAD18   | CCDC77        | 1423318_at   | 1425734_a_at | 0.9365 |
| RAD18   | FANCI         | 1423318_at   | 1425941_a_at | 0.8705 |
| RAD18   | CDC7          | 1423318_at   | 1426021_a_at | 0.8935 |
| RAD18   | RG9MTD2       | 1423318_at   | 1427375_at   | 0.8816 |
| RAD18   | PEG10         | 1423318_at   | 1427550_at   | 0.9420 |
| RAD18   | FANCI         | 1423318_at   | 1427953_at   | 0.9198 |
| RAD18   | SRGAP2        | 1423318_at   | 1427967_at   | 0.8016 |
| RAD18   | CAND1         | 1423318_at   | 1428649_at   | 0.8898 |
| RAD18   | SPDYA         | 1423318_at   | 1429470_at   | 0.8853 |
| RAD18   | MCM8          | 1423318_at   | 1429557_at   | 0.8971 |
| RAD18   | SMC2          | 1423318_at   | 1429659_at   | 0.8945 |
| RAD18   | 4632434I11RIK | 1423318_at   | 1429734_at   | 0.8096 |
| RAD18   | HELLS         | 1423318_at   | 1430139_at   | 0.8711 |
| RAD18   | CEP70         | 1423318_at   | 1430231_a_at | 0.8697 |
| RAD18   | NUP205        | 1423318_at   | 1430343_at   | 0.8648 |
| RAD18   | NCAPD3        | 1423318_at   | 1430782_at   | 0.8853 |
| RAD18   | RCBTB2        | 1423318_at   | 1431017_at   | 0.9021 |
| RAD18   | MPHOSPH9      | 1423318_at   | 1431053_at   | 0.8615 |
| RAD18   | TGIF2         | 1423318_at   | 1431115_at   | 0.8529 |

|       |               |            |              |        |
|-------|---------------|------------|--------------|--------|
| RAD18 | PGAP1         | 1423318_at | 1431169_at   | 0.8832 |
| RAD18 | MATR3         | 1423318_at | 1431235_at   | 0.9405 |
| RAD18 | 4933432K03RIK | 1423318_at | 1431489_at   | 0.9590 |
| RAD18 | PPIH          | 1423318_at | 1431505_at   | 0.8813 |
| RAD18 | 2610021K21RIK | 1423318_at | 1431667_s_at | 0.9016 |
| RAD18 | PIGN          | 1423318_at | 1432115_a_at | 0.9312 |
| RAD18 | ERCC4         | 1423318_at | 1432272_a_at | 0.8039 |
| RAD18 | MIPOL1        | 1423318_at | 1432284_at   | 0.9554 |
| RAD18 | THG1L         | 1423318_at | 1432393_a_at | 0.8879 |
| RAD18 | 1700106N22RIK | 1423318_at | 1432504_at   | 0.9025 |
| RAD18 | TROAP         | 1423318_at | 1433790_at   | 0.8409 |
| RAD18 | SUV39H2       | 1423318_at | 1433996_at   | 0.8968 |
| RAD18 | NPHP4         | 1423318_at | 1434024_at   | 0.8028 |
| RAD18 | EXOD1         | 1423318_at | 1435390_at   | 0.8097 |
| RAD18 | GEMIN5        | 1423318_at | 1436311_at   | 0.8713 |
| RAD18 | CD109         | 1423318_at | 1436346_at   | 0.9142 |
| RAD18 | CEP78         | 1423318_at | 1436352_at   | 0.8394 |
| RAD18 | ZBTB12        | 1423318_at | 1436382_at   | 0.9813 |
| RAD18 | PPP1R14B      | 1423318_at | 1436716_at   | 0.9613 |
| RAD18 | PIF1          | 1423318_at | 1436738_at   | 0.9577 |
| RAD18 | 4922501L14RIK | 1423318_at | 1436969_at   | 0.8477 |
| RAD18 | 2810408I11RIK | 1423318_at | 1437549_at   | 0.9641 |
| RAD18 | PIGT          | 1423318_at | 1437594_x_at | 0.9230 |
| RAD18 | AV164956      | 1423318_at | 1437673_at   | 0.8366 |
| RAD18 | 4933432K03RIK | 1423318_at | 1438356_x_at | 0.9140 |
| RAD18 | RAD51C        | 1423318_at | 1438453_at   | 0.8888 |
| RAD18 | DHX33         | 1423318_at | 1438765_at   | 0.8940 |
| RAD18 | AH11          | 1423318_at | 1439083_at   | 0.8343 |
| RAD18 | FANCD2        | 1423318_at | 1439091_at   | 0.8788 |
| RAD18 | A1746468      | 1423318_at | 1439960_at   | 0.9087 |
| RAD18 | ABCC12        | 1423318_at | 1439985_at   | 0.8386 |
| RAD18 | A930024E05RIK | 1423318_at | 1440206_at   | 0.8289 |
| RAD18 | KIF20B        | 1423318_at | 1440924_at   | 0.9336 |
| RAD18 | A430071A18RIK | 1423318_at | 1441113_at   | 0.9470 |
| RAD18 | MATR3         | 1423318_at | 1441272_at   | 0.9722 |
| RAD18 | KBTBD8        | 1423318_at | 1441275_at   | 0.9387 |
| RAD18 | NKRF          | 1423318_at | 1441325_at   | 0.8982 |
| RAD18 | AU043080      | 1423318_at | 1441375_at   | 0.8449 |
| RAD18 | CCDC38        | 1423318_at | 1441965_at   | 0.8937 |
| RAD18 | TAF1D         | 1423318_at | 1442289_at   | 0.9767 |
| RAD18 | TTK           | 1423318_at | 1442594_at   | 0.8885 |
| RAD18 | AW545941      | 1423318_at | 1443007_at   | 0.8553 |
| RAD18 | BB444561      | 1423318_at | 1443171_at   | 0.9104 |
| RAD18 | BM202761      | 1423318_at | 1443800_at   | 0.9608 |
| RAD18 | ZBTB39        | 1423318_at | 1443880_at   | 0.8400 |
| RAD18 | ERCC6L        | 1423318_at | 1444024_at   | 0.8896 |
| RAD18 | AV228095      | 1423318_at | 1444443_at   | 0.9373 |
| RAD18 | MASTL         | 1423318_at | 1444725_at   | 0.8933 |
| RAD18 | BC023969      | 1423318_at | 1445226_at   | 0.8161 |
| RAD18 | C530044C16RIK | 1423318_at | 1445247_at   | 0.9267 |
| RAD18 | AV323315      | 1423318_at | 1445298_at   | 0.8303 |

|         |               |            |              |        |
|---------|---------------|------------|--------------|--------|
| RAD18   | 9330118A15RIK | 1423318_at | 1446612_at   | 0.9241 |
| RAD18   | BE953578      | 1423318_at | 1447298_at   | 0.8914 |
| RAD18   | KCND3         | 1423318_at | 1447513_at   | 0.8668 |
| RAD18   | OGG1          | 1423318_at | 1448815_at   | 0.9171 |
| RAD18   | FOXM1         | 1423318_at | 1448834_at   | 0.8177 |
| RAD18   | SKP2          | 1423318_at | 1449293_a_at | 0.9060 |
| RAD18   | SUPT16H       | 1423318_at | 1449578_at   | 0.8800 |
| RAD18   | CCNB1         | 1423318_at | 1449675_at   | 0.9035 |
| RAD18   | 4933411K20RIK | 1423318_at | 1450076_at   | 0.9068 |
| RAD18   | TCERG1        | 1423318_at | 1450100_a_at | 0.8998 |
| RAD18   | ASCL1         | 1423318_at | 1450164_at   | 0.8186 |
| RAD18   | MED1          | 1423318_at | 1450402_at   | 0.9342 |
| RAD18   | MYBL1         | 1423318_at | 1450481_at   | 0.9678 |
| RAD18   | SOX3          | 1423318_at | 1450485_at   | 0.8663 |
| RAD18   | SALL1         | 1423318_at | 1450489_at   | 0.8461 |
| RAD18   | HMGA2         | 1423318_at | 1450780_s_at | 0.9655 |
| RAD18   | HMGA2         | 1423318_at | 1450781_at   | 0.9595 |
| RAD18   | ZNF451        | 1423318_at | 1451816_at   | 0.9865 |
| RAD18   | LMNB2         | 1423318_at | 1451849_a_at | 0.8942 |
| RAD18   | 6720460F02RIK | 1423318_at | 1452073_at   | 0.8216 |
| RAD18   | ZBED3         | 1423318_at | 1452088_at   | 0.9712 |
| RAD18   | RRP1B         | 1423318_at | 1452119_at   | 0.8711 |
| RAD18   | ASPM          | 1423318_at | 1452459_at   | 0.8403 |
| RAD18   | AAK1          | 1423318_at | 1452632_at   | 0.8315 |
| RAD18   | MLF1IP        | 1423318_at | 1452816_at   | 0.9517 |
| RAD18   | TTF2          | 1423318_at | 1452818_at   | 0.9204 |
| RAD18   | TMEM138       | 1423318_at | 1452978_at   | 0.8953 |
| RAD18   | RHOBTB3       | 1423318_at | 1453227_at   | 0.8401 |
| RAD18   | HELLS         | 1423318_at | 1453361_at   | 0.9305 |
| RAD18   | TROAP         | 1423318_at | 1453370_at   | 0.9299 |
| RAD18   | CEP55         | 1423318_at | 1453683_a_at | 0.9439 |
| RAD18   | DHX38         | 1423318_at | 1453751_at   | 0.8084 |
| RAD18   | PHF6          | 1423318_at | 1453761_at   | 0.9299 |
| RAD18   | NETO2         | 1423318_at | 1454032_at   | 0.8041 |
| RAD18   | CCDC77        | 1423318_at | 1454228_a_at | 0.9606 |
| RAD18   | EXOD1         | 1423318_at | 1454229_a_at | 0.8859 |
| RAD18   | UTP23         | 1423318_at | 1455259_a_at | 0.9295 |
| RAD18   | IER5L         | 1423318_at | 1455881_at   | 0.8343 |
| RAD18   | 2700049P18RIK | 1423318_at | 1456163_at   | 0.9242 |
| RAD18   | DTL           | 1423318_at | 1456652_at   | 0.8251 |
| RAD18   | RTEL1         | 1423318_at | 1456729_x_at | 0.8912 |
| RAD18   | AV254764      | 1423318_at | 1456951_at   | 0.9162 |
| RAD18   | TAF2          | 1423318_at | 1457351_at   | 0.9040 |
| RAD18   | ETAA1         | 1423318_at | 1457882_at   | 0.9280 |
| RAD18   | ZNF69         | 1423318_at | 1458274_at   | 0.8157 |
| RAD18   | MTR           | 1423318_at | 1458532_at   | 0.8879 |
| RAD18   | RNF219        | 1423318_at | 1458636_at   | 0.9163 |
| RAD18   | BB463474      | 1423318_at | 1458902_at   | 0.9705 |
| RAD18   | AA763515      | 1423318_at | 1460065_at   | 0.9569 |
| SMARCC1 | D2ERTD750E    | 1423417_at | 1423464_at   | 0.9153 |
| SMARCC1 | SEPT2         | 1423417_at | 1423473_at   | 0.9128 |

|         |               |            |              |        |
|---------|---------------|------------|--------------|--------|
| SMARCC1 | MASTL         | 1423417_at | 1423524_at   | 0.9333 |
| SMARCC1 | MASTL         | 1423417_at | 1423525_at   | 0.9129 |
| SMARCC1 | KCNC1         | 1423417_at | 1423559_at   | 0.8587 |
| SMARCC1 | TMEM48        | 1423417_at | 1424173_at   | 0.9505 |
| SMARCC1 | CAMKK2        | 1423417_at | 1424476_at   | 0.8222 |
| SMARCC1 | HIP1          | 1423417_at | 1424756_at   | 0.9375 |
| SMARCC1 | WDR62         | 1423417_at | 1424849_at   | 0.9299 |
| SMARCC1 | HUS1          | 1423417_at | 1425366_a_at | 0.8853 |
| SMARCC1 | PSRC1         | 1423417_at | 1425416_s_at | 0.9017 |
| SMARCC1 | CD109         | 1423417_at | 1425658_at   | 0.9417 |
| SMARCC1 | CCDC77        | 1423417_at | 1425734_a_at | 0.9220 |
| SMARCC1 | FANCI         | 1423417_at | 1425941_a_at | 0.9459 |
| SMARCC1 | CDC7          | 1423417_at | 1426021_a_at | 0.9286 |
| SMARCC1 | PVT1          | 1423417_at | 1427140_at   | 0.9024 |
| SMARCC1 | RG9MTD2       | 1423417_at | 1427375_at   | 0.9176 |
| SMARCC1 | FANCI         | 1423417_at | 1427953_at   | 0.9053 |
| SMARCC1 | SRGAP2        | 1423417_at | 1427967_at   | 0.9286 |
| SMARCC1 | CAND1         | 1423417_at | 1428649_at   | 0.9200 |
| SMARCC1 | ZNF157        | 1423417_at | 1428887_at   | 0.8685 |
| SMARCC1 | MCM8          | 1423417_at | 1429557_at   | 0.8703 |
| SMARCC1 | SMC2          | 1423417_at | 1429659_at   | 0.9368 |
| SMARCC1 | 6230416J20RIK | 1423417_at | 1429665_at   | 0.8937 |
| SMARCC1 | 4632434I11RIK | 1423417_at | 1429734_at   | 0.9256 |
| SMARCC1 | HELLS         | 1423417_at | 1430139_at   | 0.8988 |
| SMARCC1 | CEP70         | 1423417_at | 1430231_a_at | 0.9244 |
| SMARCC1 | NUP205        | 1423417_at | 1430343_at   | 0.9286 |
| SMARCC1 | NCAPD3        | 1423417_at | 1430782_at   | 0.8757 |
| SMARCC1 | TGIF2         | 1423417_at | 1431115_at   | 0.8562 |
| SMARCC1 | PGAP1         | 1423417_at | 1431169_at   | 0.9098 |
| SMARCC1 | DLG5          | 1423417_at | 1431187_s_at | 0.8953 |
| SMARCC1 | PVT1          | 1423417_at | 1431352_s_at | 0.8511 |
| SMARCC1 | 4933432K03RIK | 1423417_at | 1431489_at   | 0.8452 |
| SMARCC1 | 2610021K21RIK | 1423417_at | 1431667_s_at | 0.9154 |
| SMARCC1 | RAB31         | 1423417_at | 1431691_a_at | 0.8357 |
| SMARCC1 | PIGN          | 1423417_at | 1432115_a_at | 0.9347 |
| SMARCC1 | ERCC4         | 1423417_at | 1432272_a_at | 0.9250 |
| SMARCC1 | ARMC9         | 1423417_at | 1432383_a_at | 0.9101 |
| SMARCC1 | 1700106N22RIK | 1423417_at | 1432504_at   | 0.8596 |
| SMARCC1 | TROAP         | 1423417_at | 1433790_at   | 0.8170 |
| SMARCC1 | SUV39H2       | 1423417_at | 1433996_at   | 0.9362 |
| SMARCC1 | NPHP4         | 1423417_at | 1434024_at   | 0.9006 |
| SMARCC1 | SRGAP2        | 1423417_at | 1434407_at   | 0.9236 |
| SMARCC1 | EXOD1         | 1423417_at | 1435390_at   | 0.8159 |
| SMARCC1 | GEMIN5        | 1423417_at | 1436311_at   | 0.8087 |
| SMARCC1 | CD109         | 1423417_at | 1436346_at   | 0.9169 |
| SMARCC1 | CEP78         | 1423417_at | 1436352_at   | 0.8625 |
| SMARCC1 | ZBTB12        | 1423417_at | 1436382_at   | 0.9141 |
| SMARCC1 | PIF1          | 1423417_at | 1436738_at   | 0.8623 |
| SMARCC1 | SOX11         | 1423417_at | 1436790_a_at | 0.8972 |
| SMARCC1 | 2810408I11RIK | 1423417_at | 1437549_at   | 0.9345 |
| SMARCC1 | AV164956      | 1423417_at | 1437673_at   | 0.8481 |

|         |               |            |              |        |
|---------|---------------|------------|--------------|--------|
| SMARCC1 | HEATR5B       | 1423417_at | 1438085_at   | 0.8976 |
| SMARCC1 | 4933432K03RIK | 1423417_at | 1438356_x_at | 0.9332 |
| SMARCC1 | RAD51C        | 1423417_at | 1438453_at   | 0.9146 |
| SMARCC1 | DHX33         | 1423417_at | 1438765_at   | 0.9102 |
| SMARCC1 | AH11          | 1423417_at | 1439083_at   | 0.9211 |
| SMARCC1 | FANCD2        | 1423417_at | 1439091_at   | 0.9057 |
| SMARCC1 | A1506816      | 1423417_at | 1439483_at   | 0.9124 |
| SMARCC1 | A1746468      | 1423417_at | 1439960_at   | 0.9401 |
| SMARCC1 | ABCC12        | 1423417_at | 1439985_at   | 0.8390 |
| SMARCC1 | A930024E05RIK | 1423417_at | 1440206_at   | 0.9026 |
| SMARCC1 | WDR35         | 1423417_at | 1440318_at   | 0.8756 |
| SMARCC1 | KIF20B        | 1423417_at | 1440924_at   | 0.9132 |
| SMARCC1 | MATR3         | 1423417_at | 1441272_at   | 0.9080 |
| SMARCC1 | KBTBD8        | 1423417_at | 1441275_at   | 0.9293 |
| SMARCC1 | NKRF          | 1423417_at | 1441325_at   | 0.9504 |
| SMARCC1 | AU043080      | 1423417_at | 1441375_at   | 0.9105 |
| SMARCC1 | ASPM          | 1423417_at | 1441520_at   | 0.8697 |
| SMARCC1 | D2ERTD750E    | 1423417_at | 1442280_at   | 0.8053 |
| SMARCC1 | TAF1D         | 1423417_at | 1442289_at   | 0.8755 |
| SMARCC1 | NUP188        | 1423417_at | 1442314_at   | 0.8728 |
| SMARCC1 | TTK           | 1423417_at | 1442594_at   | 0.9354 |
| SMARCC1 | AW545941      | 1423417_at | 1443007_at   | 0.8197 |
| SMARCC1 | BB337104      | 1423417_at | 1443026_at   | 0.8049 |
| SMARCC1 | BB444561      | 1423417_at | 1443171_at   | 0.9224 |
| SMARCC1 | BM202761      | 1423417_at | 1443800_at   | 0.8428 |
| SMARCC1 | ZBTB39        | 1423417_at | 1443880_at   | 0.8853 |
| SMARCC1 | CDK5RAP2      | 1423417_at | 1443976_at   | 0.8374 |
| SMARCC1 | ERCC6L        | 1423417_at | 1444024_at   | 0.9468 |
| SMARCC1 | AV228095      | 1423417_at | 1444443_at   | 0.9250 |
| SMARCC1 | 6530418L21RIK | 1423417_at | 1444723_at   | 0.8717 |
| SMARCC1 | MASTL         | 1423417_at | 1444725_at   | 0.8815 |
| SMARCC1 | BC023969      | 1423417_at | 1445226_at   | 0.9320 |
| SMARCC1 | C530044C16RIK | 1423417_at | 1445247_at   | 0.8061 |
| SMARCC1 | AV323315      | 1423417_at | 1445298_at   | 0.8522 |
| SMARCC1 | KCND3         | 1423417_at | 1447513_at   | 0.9308 |
| SMARCC1 | SEMA6D        | 1423417_at | 1448060_at   | 0.8349 |
| SMARCC1 | OGG1          | 1423417_at | 1448815_at   | 0.9138 |
| SMARCC1 | FOXM1         | 1423417_at | 1448834_at   | 0.8858 |
| SMARCC1 | SKP2          | 1423417_at | 1449293_a_at | 0.9479 |
| SMARCC1 | SOX4          | 1423417_at | 1449370_at   | 0.8518 |
| SMARCC1 | SUPT16H       | 1423417_at | 1449578_at   | 0.9671 |
| SMARCC1 | CCNB1         | 1423417_at | 1449675_at   | 0.9364 |
| SMARCC1 | LFNG          | 1423417_at | 1449943_at   | 0.8347 |
| SMARCC1 | APC           | 1423417_at | 1450056_at   | 0.8252 |
| SMARCC1 | 4933411K20RIK | 1423417_at | 1450076_at   | 0.9334 |
| SMARCC1 | TCERG1        | 1423417_at | 1450100_a_at | 0.9658 |
| SMARCC1 | ASCL1         | 1423417_at | 1450164_at   | 0.8993 |
| SMARCC1 | ZFP354C       | 1423417_at | 1450321_at   | 0.8828 |
| SMARCC1 | MED1          | 1423417_at | 1450402_at   | 0.8235 |
| SMARCC1 | MYBL1         | 1423417_at | 1450481_at   | 0.9074 |
| SMARCC1 | SOX3          | 1423417_at | 1450485_at   | 0.9361 |

|         |                |              |                |        |
|---------|----------------|--------------|----------------|--------|
| SMARCC1 | HMGA2          | 1423417_at   | 1450780_s_at   | 0.8871 |
| SMARCC1 | HMGA2          | 1423417_at   | 1450781_at     | 0.8140 |
| SMARCC1 | ZNF451         | 1423417_at   | 1451816_at     | 0.8991 |
| SMARCC1 | NCOR2          | 1423417_at   | 1451841_a_at   | 0.8844 |
| SMARCC1 | LMNB2          | 1423417_at   | 1451849_a_at   | 0.8706 |
| SMARCC1 | ZFP2           | 1423417_at   | 1452025_a_at   | 0.9052 |
| SMARCC1 | 6720460F02RIK  | 1423417_at   | 1452073_at     | 0.8733 |
| SMARCC1 | ZBED3          | 1423417_at   | 1452088_at     | 0.8705 |
| SMARCC1 | RRP1B          | 1423417_at   | 1452119_at     | 0.8444 |
| SMARCC1 | PVT1           | 1423417_at   | 1452324_at     | 0.8098 |
| SMARCC1 | CENPF          | 1423417_at   | 1452334_at     | 0.8669 |
| SMARCC1 | ASPM           | 1423417_at   | 1452459_at     | 0.8997 |
| SMARCC1 | MLF1IP         | 1423417_at   | 1452816_at     | 0.8735 |
| SMARCC1 | TTF2           | 1423417_at   | 1452818_at     | 0.9000 |
| SMARCC1 | TMEM138        | 1423417_at   | 1452978_at     | 0.8604 |
| SMARCC1 | RHOBTB3        | 1423417_at   | 1453227_at     | 0.9282 |
| SMARCC1 | HELLS          | 1423417_at   | 1453361_at     | 0.8317 |
| SMARCC1 | TROAP          | 1423417_at   | 1453370_at     | 0.9454 |
| SMARCC1 | CEP55          | 1423417_at   | 1453683_a_at   | 0.9364 |
| SMARCC1 | DHX38          | 1423417_at   | 1453751_at     | 0.9258 |
| SMARCC1 | PHF6           | 1423417_at   | 1453761_at     | 0.9334 |
| SMARCC1 | FAM110A        | 1423417_at   | 1453768_a_at   | 0.8313 |
| SMARCC1 | NETO2          | 1423417_at   | 1454032_at     | 0.8837 |
| SMARCC1 | CCDC77         | 1423417_at   | 1454228_a_at   | 0.8959 |
| SMARCC1 | EXOD1          | 1423417_at   | 1454229_a_at   | 0.9317 |
| SMARCC1 | UTP23          | 1423417_at   | 1455259_a_at   | 0.9253 |
| SMARCC1 | 2700049P18RIK  | 1423417_at   | 1456163_at     | 0.9144 |
| SMARCC1 | RTEL1          | 1423417_at   | 1456729_x_at   | 0.8250 |
| SMARCC1 | BB053540       | 1423417_at   | 1456840_at     | 0.8005 |
| SMARCC1 | AV254764       | 1423417_at   | 1456951_at     | 0.8595 |
| SMARCC1 | TAF2           | 1423417_at   | 1457351_at     | 0.9475 |
| SMARCC1 | ZNF69          | 1423417_at   | 1458274_at     | 0.8643 |
| SMARCC1 | MTR            | 1423417_at   | 1458532_at     | 0.8939 |
| SMARCC1 | RNF219         | 1423417_at   | 1458636_at     | 0.9396 |
| SMARCC1 | BB463474       | 1423417_at   | 1458902_at     | 0.8183 |
| SMARCC1 | AFFX-DapX-5_at | 1423417_at   | AFFX-DapX-5_at | 0.8107 |
| SMARCC1 | AFFX-ThrX-5_at | 1423417_at   | AFFX-ThrX-5_at | 0.8018 |
| HIP1    | D2ERTD750E     | 1424756_at   | 1423464_at     | 0.9733 |
| PSRC1   | D2ERTD750E     | 1425416_s_at | 1423464_at     | 0.9668 |
| CAND1   | D2ERTD750E     | 1428649_at   | 1423464_at     | 0.9378 |
| ZNF157  | D2ERTD750E     | 1428887_at   | 1423464_at     | 0.9243 |
| MCM8    | D2ERTD750E     | 1429557_at   | 1423464_at     | 0.8832 |
| HELLS   | D2ERTD750E     | 1430139_at   | 1423464_at     | 0.9578 |
| TLE4    | D2ERTD750E     | 1430384_at   | 1423464_at     | 0.8156 |
| TGIF2   | D2ERTD750E     | 1431115_at   | 1423464_at     | 0.9059 |
| ERCC4   | D2ERTD750E     | 1432272_a_at | 1423464_at     | 0.9602 |
| SUV39H2 | D2ERTD750E     | 1433996_at   | 1423464_at     | 0.9206 |
| SOX3    | D2ERTD750E     | 1435192_at   | 1423464_at     | 0.8578 |
| PIF1    | D2ERTD750E     | 1436738_at   | 1423464_at     | 0.9100 |
| SOX11   | D2ERTD750E     | 1436790_a_at | 1423464_at     | 0.9124 |
| ASCL1   | D2ERTD750E     | 1437086_at   | 1423464_at     | 0.9168 |

|         |            |              |            |        |
|---------|------------|--------------|------------|--------|
| RAD51C  | D2ERTD750E | 1438453_at   | 1423464_at | 0.9357 |
| NKRF    | D2ERTD750E | 1441325_at   | 1423464_at | 0.9592 |
| TAF1D   | D2ERTD750E | 1442289_at   | 1423464_at | 0.8427 |
| FOXMI   | D2ERTD750E | 1448834_at   | 1423464_at | 0.9772 |
| SOX4    | D2ERTD750E | 1449370_at   | 1423464_at | 0.8662 |
| SUPT16H | D2ERTD750E | 1449578_at   | 1423464_at | 0.9204 |
| TCERG1  | D2ERTD750E | 1450100_a_at | 1423464_at | 0.9534 |
| ASCL1   | D2ERTD750E | 1450164_at   | 1423464_at | 0.9807 |
| NPAS3   | D2ERTD750E | 1450287_at   | 1423464_at | 0.8277 |
| ZFP354C | D2ERTD750E | 1450321_at   | 1423464_at | 0.9121 |
| MYBL1   | D2ERTD750E | 1450481_at   | 1423464_at | 0.9040 |
| SOX3    | D2ERTD750E | 1450485_at   | 1423464_at | 0.9463 |
| SALL1   | D2ERTD750E | 1450489_at   | 1423464_at | 0.8031 |
| HMGA2   | D2ERTD750E | 1450780_s_at | 1423464_at | 0.9238 |
| ZNF451  | D2ERTD750E | 1451816_at   | 1423464_at | 0.8843 |
| NCOR2   | D2ERTD750E | 1451841_a_at | 1423464_at | 0.9372 |
| ZFP2    | D2ERTD750E | 1452025_a_at | 1423464_at | 0.9271 |
| ZBED3   | D2ERTD750E | 1452088_at   | 1423464_at | 0.8458 |
| CENPF   | D2ERTD750E | 1452334_at   | 1423464_at | 0.9122 |
| MLF1IP  | D2ERTD750E | 1452816_at   | 1423464_at | 0.8792 |
| TTF2    | D2ERTD750E | 1452818_at   | 1423464_at | 0.9394 |
| HELLS   | D2ERTD750E | 1453361_at   | 1423464_at | 0.8127 |
| PHF6    | D2ERTD750E | 1453761_at   | 1423464_at | 0.9595 |
| TAF2    | D2ERTD750E | 1457351_at   | 1423464_at | 0.9558 |
| ZNF69   | D2ERTD750E | 1458274_at   | 1423464_at | 0.8693 |
| HIP1    | SEPT2      | 1424756_at   | 1423473_at | 0.9150 |
| PSRC1   | SEPT2      | 1425416_s_at | 1423473_at | 0.9175 |
| CAND1   | SEPT2      | 1428649_at   | 1423473_at | 0.8854 |
| ZNF157  | SEPT2      | 1428887_at   | 1423473_at | 0.8882 |
| MCM8    | SEPT2      | 1429557_at   | 1423473_at | 0.8736 |
| HELLS   | SEPT2      | 1430139_at   | 1423473_at | 0.8771 |
| TGIF2   | SEPT2      | 1431115_at   | 1423473_at | 0.8602 |
| ERCC4   | SEPT2      | 1432272_a_at | 1423473_at | 0.9194 |
| SUV39H2 | SEPT2      | 1433996_at   | 1423473_at | 0.8983 |
| PIF1    | SEPT2      | 1436738_at   | 1423473_at | 0.8457 |
| SOX11   | SEPT2      | 1436790_a_at | 1423473_at | 0.8878 |
| ASCL1   | SEPT2      | 1437086_at   | 1423473_at | 0.8359 |
| RAD51C  | SEPT2      | 1438453_at   | 1423473_at | 0.8837 |
| NKRF    | SEPT2      | 1441325_at   | 1423473_at | 0.9225 |
| TAF1D   | SEPT2      | 1442289_at   | 1423473_at | 0.8476 |
| FOXMI   | SEPT2      | 1448834_at   | 1423473_at | 0.9005 |
| SOX4    | SEPT2      | 1449370_at   | 1423473_at | 0.8355 |
| SUPT16H | SEPT2      | 1449578_at   | 1423473_at | 0.9140 |
| TCERG1  | SEPT2      | 1450100_a_at | 1423473_at | 0.9453 |
| ASCL1   | SEPT2      | 1450164_at   | 1423473_at | 0.9109 |
| ZFP354C | SEPT2      | 1450321_at   | 1423473_at | 0.8750 |
| MED1    | SEPT2      | 1450402_at   | 1423473_at | 0.8043 |
| MYBL1   | SEPT2      | 1450481_at   | 1423473_at | 0.8930 |
| SOX3    | SEPT2      | 1450485_at   | 1423473_at | 0.9118 |
| HMGA2   | SEPT2      | 1450780_s_at | 1423473_at | 0.8803 |
| ZNF451  | SEPT2      | 1451816_at   | 1423473_at | 0.8664 |

|         |       |              |            |        |
|---------|-------|--------------|------------|--------|
| NCOR2   | SEPT2 | 1451841_a_at | 1423473_at | 0.8850 |
| ZFP2    | SEPT2 | 1452025_a_at | 1423473_at | 0.8952 |
| ZBED3   | SEPT2 | 1452088_at   | 1423473_at | 0.8430 |
| CENPF   | SEPT2 | 1452334_at   | 1423473_at | 0.8925 |
| MLF1IP  | SEPT2 | 1452816_at   | 1423473_at | 0.8159 |
| TTF2    | SEPT2 | 1452818_at   | 1423473_at | 0.8977 |
| PHF6    | SEPT2 | 1453761_at   | 1423473_at | 0.9317 |
| TAF2    | SEPT2 | 1457351_at   | 1423473_at | 0.9251 |
| ZNF69   | SEPT2 | 1458274_at   | 1423473_at | 0.8407 |
| HIP1    | MASTL | 1424756_at   | 1423524_at | 0.9734 |
| PSRC1   | MASTL | 1425416_s_at | 1423524_at | 0.9617 |
| CAND1   | MASTL | 1428649_at   | 1423524_at | 0.9510 |
| ZNF157  | MASTL | 1428887_at   | 1423524_at | 0.9076 |
| MCM8    | MASTL | 1429557_at   | 1423524_at | 0.9107 |
| HELLS   | MASTL | 1430139_at   | 1423524_at | 0.9278 |
| TLE4    | MASTL | 1430384_at   | 1423524_at | 0.8121 |
| TGIF2   | MASTL | 1431115_at   | 1423524_at | 0.9033 |
| ERCC4   | MASTL | 1432272_a_at | 1423524_at | 0.9653 |
| SUV39H2 | MASTL | 1433996_at   | 1423524_at | 0.9427 |
| PIF1    | MASTL | 1436738_at   | 1423524_at | 0.9025 |
| SOX11   | MASTL | 1436790_a_at | 1423524_at | 0.8952 |
| ASCL1   | MASTL | 1437086_at   | 1423524_at | 0.8708 |
| RAD51C  | MASTL | 1438453_at   | 1423524_at | 0.9297 |
| NKRF    | MASTL | 1441325_at   | 1423524_at | 0.9796 |
| TAF1D   | MASTL | 1442289_at   | 1423524_at | 0.8884 |
| FOXM1   | MASTL | 1448834_at   | 1423524_at | 0.9412 |
| SOX4    | MASTL | 1449370_at   | 1423524_at | 0.8389 |
| SUPT16H | MASTL | 1449578_at   | 1423524_at | 0.9429 |
| TCERG1  | MASTL | 1450100_a_at | 1423524_at | 0.9825 |
| ASCL1   | MASTL | 1450164_at   | 1423524_at | 0.9537 |
| ZFP354C | MASTL | 1450321_at   | 1423524_at | 0.8956 |
| MED1    | MASTL | 1450402_at   | 1423524_at | 0.8221 |
| MYBL1   | MASTL | 1450481_at   | 1423524_at | 0.9511 |
| SOX3    | MASTL | 1450485_at   | 1423524_at | 0.9434 |
| SALL1   | MASTL | 1450489_at   | 1423524_at | 0.8325 |
| HMGA2   | MASTL | 1450780_s_at | 1423524_at | 0.9293 |
| HMGA2   | MASTL | 1450781_at   | 1423524_at | 0.8208 |
| ZNF451  | MASTL | 1451816_at   | 1423524_at | 0.9208 |
| NCOR2   | MASTL | 1451841_a_at | 1423524_at | 0.9247 |
| ZFP2    | MASTL | 1452025_a_at | 1423524_at | 0.9294 |
| ZBED3   | MASTL | 1452088_at   | 1423524_at | 0.8800 |
| CENPF   | MASTL | 1452334_at   | 1423524_at | 0.9282 |
| MLF1IP  | MASTL | 1452816_at   | 1423524_at | 0.9178 |
| TTF2    | MASTL | 1452818_at   | 1423524_at | 0.9481 |
| HELLS   | MASTL | 1453361_at   | 1423524_at | 0.8395 |
| PHF6    | MASTL | 1453761_at   | 1423524_at | 0.9897 |
| TAF2    | MASTL | 1457351_at   | 1423524_at | 0.9866 |
| ZNF69   | MASTL | 1458274_at   | 1423524_at | 0.8988 |
| HIP1    | MASTL | 1424756_at   | 1423525_at | 0.9730 |
| PSRC1   | MASTL | 1425416_s_at | 1423525_at | 0.9616 |
| CAND1   | MASTL | 1428649_at   | 1423525_at | 0.9250 |



|         |       |              |            |        |
|---------|-------|--------------|------------|--------|
| ZNF157  | MASTL | 1428887_at   | 1423525_at | 0.9127 |
| MCM8    | MASTL | 1429557_at   | 1423525_at | 0.8822 |
| HELLS   | MASTL | 1430139_at   | 1423525_at | 0.9432 |
| TLE4    | MASTL | 1430384_at   | 1423525_at | 0.8089 |
| TGIF2   | MASTL | 1431115_at   | 1423525_at | 0.9070 |
| ERCC4   | MASTL | 1432272_a_at | 1423525_at | 0.9569 |
| SUV39H2 | MASTL | 1433996_at   | 1423525_at | 0.9199 |
| SOX3    | MASTL | 1435192_at   | 1423525_at | 0.8595 |
| PIF1    | MASTL | 1436738_at   | 1423525_at | 0.9113 |
| SOX11   | MASTL | 1436790_a_at | 1423525_at | 0.8996 |
| ASCL1   | MASTL | 1437086_at   | 1423525_at | 0.9209 |
| RAD51C  | MASTL | 1438453_at   | 1423525_at | 0.9307 |
| NKRF    | MASTL | 1441325_at   | 1423525_at | 0.9583 |
| TAF1D   | MASTL | 1442289_at   | 1423525_at | 0.8487 |
| FOXM1   | MASTL | 1448834_at   | 1423525_at | 0.9747 |
| SOX4    | MASTL | 1449370_at   | 1423525_at | 0.8485 |
| SUPT16H | MASTL | 1449578_at   | 1423525_at | 0.9199 |
| TCERG1  | MASTL | 1450100_a_at | 1423525_at | 0.9581 |
| ASCL1   | MASTL | 1450164_at   | 1423525_at | 0.9747 |
| NPAS3   | MASTL | 1450287_at   | 1423525_at | 0.8418 |
| ZFP354C | MASTL | 1450321_at   | 1423525_at | 0.9061 |
| MYBL1   | MASTL | 1450481_at   | 1423525_at | 0.9124 |
| SOX3    | MASTL | 1450485_at   | 1423525_at | 0.9339 |
| SALL1   | MASTL | 1450489_at   | 1423525_at | 0.8206 |
| HMGA2   | MASTL | 1450780_s_at | 1423525_at | 0.9228 |
| ZNF451  | MASTL | 1451816_at   | 1423525_at | 0.8840 |
| NCOR2   | MASTL | 1451841_a_at | 1423525_at | 0.9291 |
| ZFP2    | MASTL | 1452025_a_at | 1423525_at | 0.9359 |
| ZBED3   | MASTL | 1452088_at   | 1423525_at | 0.8447 |
| CENPF   | MASTL | 1452334_at   | 1423525_at | 0.9226 |
| MLF1IP  | MASTL | 1452816_at   | 1423525_at | 0.8795 |
| TTF2    | MASTL | 1452818_at   | 1423525_at | 0.9438 |
| HELLS   | MASTL | 1453361_at   | 1423525_at | 0.8071 |
| PHF6    | MASTL | 1453761_at   | 1423525_at | 0.9612 |
| TAF2    | MASTL | 1457351_at   | 1423525_at | 0.9596 |
| ZNF69   | MASTL | 1458274_at   | 1423525_at | 0.8823 |
| HIP1    | KCNC1 | 1424756_at   | 1423559_at | 0.8667 |
| PSRC1   | KCNC1 | 1425416_s_at | 1423559_at | 0.8816 |
| CAND1   | KCNC1 | 1428649_at   | 1423559_at | 0.8915 |
| ZNF157  | KCNC1 | 1428887_at   | 1423559_at | 0.8725 |
| HELLS   | KCNC1 | 1430139_at   | 1423559_at | 0.8068 |
| ERCC4   | KCNC1 | 1432272_a_at | 1423559_at | 0.8951 |
| SUV39H2 | KCNC1 | 1433996_at   | 1423559_at | 0.8134 |
| SOX11   | KCNC1 | 1436790_a_at | 1423559_at | 0.8774 |
| RAD51C  | KCNC1 | 1438453_at   | 1423559_at | 0.8221 |
| NKRF    | KCNC1 | 1441325_at   | 1423559_at | 0.8623 |
| SOX4    | KCNC1 | 1449370_at   | 1423559_at | 0.8263 |
| SUPT16H | KCNC1 | 1449578_at   | 1423559_at | 0.8603 |
| TCERG1  | KCNC1 | 1450100_a_at | 1423559_at | 0.8654 |
| ASCL1   | KCNC1 | 1450164_at   | 1423559_at | 0.8643 |
| ZFP354C | KCNC1 | 1450321_at   | 1423559_at | 0.8786 |

|         |        |              |            |        |
|---------|--------|--------------|------------|--------|
| SOX3    | KCNC1  | 1450485_at   | 1423559_at | 0.8597 |
| NCOR2   | KCNC1  | 1451841_a_at | 1423559_at | 0.8794 |
| ZFP2    | KCNC1  | 1452025_a_at | 1423559_at | 0.8230 |
| CENPF   | KCNC1  | 1452334_at   | 1423559_at | 0.8464 |
| PHF6    | KCNC1  | 1453761_at   | 1423559_at | 0.8417 |
| TAF2    | KCNC1  | 1457351_at   | 1423559_at | 0.8482 |
| HIP1    | TMEM48 | 1424756_at   | 1424173_at | 0.9810 |
| PSRC1   | TMEM48 | 1425416_s_at | 1424173_at | 0.9638 |
| CAND1   | TMEM48 | 1428649_at   | 1424173_at | 0.9673 |
| ZNF157  | TMEM48 | 1428887_at   | 1424173_at | 0.9263 |
| MCM8    | TMEM48 | 1429557_at   | 1424173_at | 0.8991 |
| HELLS   | TMEM48 | 1430139_at   | 1424173_at | 0.9049 |
| TLE4    | TMEM48 | 1430384_at   | 1424173_at | 0.8063 |
| TGIF2   | TMEM48 | 1431115_at   | 1424173_at | 0.9185 |
| ERCC4   | TMEM48 | 1432272_a_at | 1424173_at | 0.9693 |
| SUV39H2 | TMEM48 | 1433996_at   | 1424173_at | 0.9281 |
| PIF1    | TMEM48 | 1436738_at   | 1424173_at | 0.8890 |
| SOX11   | TMEM48 | 1436790_a_at | 1424173_at | 0.8927 |
| ASCL1   | TMEM48 | 1437086_at   | 1424173_at | 0.8440 |
| RAD51C  | TMEM48 | 1438453_at   | 1424173_at | 0.9086 |
| NKRF    | TMEM48 | 1441325_at   | 1424173_at | 0.9716 |
| TAF1D   | TMEM48 | 1442289_at   | 1424173_at | 0.8794 |
| FOXM1   | TMEM48 | 1448834_at   | 1424173_at | 0.9547 |
| SOX4    | TMEM48 | 1449370_at   | 1424173_at | 0.8592 |
| SUPT16H | TMEM48 | 1449578_at   | 1424173_at | 0.9562 |
| TCERG1  | TMEM48 | 1450100_a_at | 1424173_at | 0.9770 |
| ASCL1   | TMEM48 | 1450164_at   | 1424173_at | 0.9449 |
| ZFP354C | TMEM48 | 1450321_at   | 1424173_at | 0.9118 |
| MYBL1   | TMEM48 | 1450481_at   | 1424173_at | 0.9260 |
| SOX3    | TMEM48 | 1450485_at   | 1424173_at | 0.9602 |
| SALL1   | TMEM48 | 1450489_at   | 1424173_at | 0.8645 |
| HMGA2   | TMEM48 | 1450780_s_at | 1424173_at | 0.9030 |
| HMGA2   | TMEM48 | 1450781_at   | 1424173_at | 0.8234 |
| ZNF451  | TMEM48 | 1451816_at   | 1424173_at | 0.9146 |
| NCOR2   | TMEM48 | 1451841_a_at | 1424173_at | 0.9478 |
| ZFP2    | TMEM48 | 1452025_a_at | 1424173_at | 0.9579 |
| ZBED3   | TMEM48 | 1452088_at   | 1424173_at | 0.8739 |
| CENPF   | TMEM48 | 1452334_at   | 1424173_at | 0.8987 |
| MLF1IP  | TMEM48 | 1452816_at   | 1424173_at | 0.8850 |
| TTF2    | TMEM48 | 1452818_at   | 1424173_at | 0.9386 |
| HELLS   | TMEM48 | 1453361_at   | 1424173_at | 0.8500 |
| PHF6    | TMEM48 | 1453761_at   | 1424173_at | 0.9784 |
| TAF2    | TMEM48 | 1457351_at   | 1424173_at | 0.9699 |
| ZNF69   | TMEM48 | 1458274_at   | 1424173_at | 0.8695 |
| HIP1    | CAMKK2 | 1424756_at   | 1424476_at | 0.8058 |
| PEG10   | CAMKK2 | 1427550_at   | 1424476_at | 0.9713 |
| CAND1   | CAMKK2 | 1428649_at   | 1424476_at | 0.8177 |
| MCM8    | CAMKK2 | 1429557_at   | 1424476_at | 0.8632 |
| HELLS   | CAMKK2 | 1430139_at   | 1424476_at | 0.8153 |
| SUV39H2 | CAMKK2 | 1433996_at   | 1424476_at | 0.8650 |
| PIF1    | CAMKK2 | 1436738_at   | 1424476_at | 0.9181 |

|         |               |              |              |        |
|---------|---------------|--------------|--------------|--------|
| RAD51C  | CAMKK2        | 1438453_at   | 1424476_at   | 0.8345 |
| NKRF    | CAMKK2        | 1441325_at   | 1424476_at   | 0.8554 |
| TAF1D   | CAMKK2        | 1442289_at   | 1424476_at   | 0.9531 |
| SUPT16H | CAMKK2        | 1449578_at   | 1424476_at   | 0.8304 |
| TCERG1  | CAMKK2        | 1450100_a_at | 1424476_at   | 0.8489 |
| MED1    | CAMKK2        | 1450402_at   | 1424476_at   | 0.9511 |
| MYBL1   | CAMKK2        | 1450481_at   | 1424476_at   | 0.9275 |
| SOX3    | CAMKK2        | 1450485_at   | 1424476_at   | 0.8444 |
| SALL1   | CAMKK2        | 1450489_at   | 1424476_at   | 0.8186 |
| HMGA2   | CAMKK2        | 1450780_s_at | 1424476_at   | 0.9349 |
| HMGA2   | CAMKK2        | 1450781_at   | 1424476_at   | 0.9660 |
| ZNF451  | CAMKK2        | 1451816_at   | 1424476_at   | 0.9614 |
| ZBED3   | CAMKK2        | 1452088_at   | 1424476_at   | 0.9809 |
| MLF1IP  | CAMKK2        | 1452816_at   | 1424476_at   | 0.8994 |
| TTF2    | CAMKK2        | 1452818_at   | 1424476_at   | 0.8791 |
| HELLS   | CAMKK2        | 1453361_at   | 1424476_at   | 0.9091 |
| PHF6    | CAMKK2        | 1453761_at   | 1424476_at   | 0.8762 |
| TAF2    | CAMKK2        | 1457351_at   | 1424476_at   | 0.8536 |
| HIP1    | WDR62         | 1424756_at   | 1424849_at   | 0.9537 |
| HIP1    | ATP6V0A1      | 1424756_at   | 1425227_a_at | 0.8519 |
| HIP1    | HUS1          | 1424756_at   | 1425366_a_at | 0.9343 |
| HIP1    | PSRC1         | 1424756_at   | 1425416_s_at | 0.9672 |
| HIP1    | CD109         | 1424756_at   | 1425658_at   | 0.9819 |
| HIP1    | CCDC77        | 1424756_at   | 1425734_a_at | 0.9509 |
| HIP1    | FANCI         | 1424756_at   | 1425941_a_at | 0.9702 |
| HIP1    | CDC7          | 1424756_at   | 1426021_a_at | 0.9722 |
| HIP1    | PVT1          | 1424756_at   | 1427140_at   | 0.8699 |
| HIP1    | RG9MTD2       | 1424756_at   | 1427375_at   | 0.9333 |
| HIP1    | FANCI         | 1424756_at   | 1427953_at   | 0.9646 |
| HIP1    | SRGAP2        | 1424756_at   | 1427967_at   | 0.9836 |
| HIP1    | CAND1         | 1424756_at   | 1428649_at   | 0.9570 |
| HIP1    | ZNF157        | 1424756_at   | 1428887_at   | 0.9334 |
| HIP1    | RASL11A       | 1424756_at   | 1429444_at   | 0.8587 |
| HIP1    | MCM8          | 1424756_at   | 1429557_at   | 0.8874 |
| HIP1    | SMC2          | 1424756_at   | 1429659_at   | 0.9571 |
| HIP1    | 6230416J20RIK | 1424756_at   | 1429665_at   | 0.9197 |
| HIP1    | 4632434I11RIK | 1424756_at   | 1429734_at   | 0.9624 |
| HIP1    | HELLS         | 1424756_at   | 1430139_at   | 0.9048 |
| HIP1    | CEP70         | 1424756_at   | 1430231_a_at | 0.9647 |
| HIP1    | NUP205        | 1424756_at   | 1430343_at   | 0.9475 |
| HIP1    | TLE4          | 1424756_at   | 1430384_at   | 0.8351 |
| HIP1    | NCAPD3        | 1424756_at   | 1430782_at   | 0.9127 |
| HIP1    | TGIF2         | 1424756_at   | 1431115_at   | 0.9100 |
| HIP1    | PGAP1         | 1424756_at   | 1431169_at   | 0.9283 |
| HIP1    | DLG5          | 1424756_at   | 1431187_s_at | 0.9427 |
| HIP1    | PVT1          | 1424756_at   | 1431352_s_at | 0.8798 |
| HIP1    | JAM2          | 1424756_at   | 1431416_a_at | 0.8584 |
| HIP1    | 4933432K03RIK | 1424756_at   | 1431489_at   | 0.8815 |
| HIP1    | 2610021K21RIK | 1424756_at   | 1431667_s_at | 0.9375 |
| HIP1    | RAB31         | 1424756_at   | 1431691_a_at | 0.9256 |
| HIP1    | PIGN          | 1424756_at   | 1432115_a_at | 0.9662 |

|      |               |            |              |        |
|------|---------------|------------|--------------|--------|
| HIP1 | ERCC4         | 1424756_at | 1432272_a_at | 0.9816 |
| HIP1 | ARMC9         | 1424756_at | 1432383_a_at | 0.9703 |
| HIP1 | 1700106N22RIK | 1424756_at | 1432504_at   | 0.9045 |
| HIP1 | SUV39H2       | 1424756_at | 1433996_at   | 0.9205 |
| HIP1 | NPHP4         | 1424756_at | 1434024_at   | 0.9451 |
| HIP1 | SRGAP2        | 1424756_at | 1434407_at   | 0.8879 |
| HIP1 | EXOD1         | 1424756_at | 1435390_at   | 0.8682 |
| HIP1 | CD109         | 1424756_at | 1436346_at   | 0.9629 |
| HIP1 | CEP78         | 1424756_at | 1436352_at   | 0.8610 |
| HIP1 | ZBTB12        | 1424756_at | 1436382_at   | 0.9260 |
| HIP1 | SDC3          | 1424756_at | 1436482_a_at | 0.8401 |
| HIP1 | PIF1          | 1424756_at | 1436738_at   | 0.8958 |
| HIP1 | SOX11         | 1424756_at | 1436790_a_at | 0.8843 |
| HIP1 | ASCL1         | 1424756_at | 1437086_at   | 0.8628 |
| HIP1 | LRRC4B        | 1424756_at | 1437183_at   | 0.8078 |
| HIP1 | 2810408I11RIK | 1424756_at | 1437549_at   | 0.9545 |
| HIP1 | AV164956      | 1424756_at | 1437673_at   | 0.9100 |
| HIP1 | HEATR5B       | 1424756_at | 1438085_at   | 0.9400 |
| HIP1 | 4933432K03RIK | 1424756_at | 1438356_x_at | 0.9691 |
| HIP1 | RAD51C        | 1424756_at | 1438453_at   | 0.9115 |
| HIP1 | DHX33         | 1424756_at | 1438765_at   | 0.9566 |
| HIP1 | AHI1          | 1424756_at | 1439083_at   | 0.8872 |
| HIP1 | FANCD2        | 1424756_at | 1439091_at   | 0.9203 |
| HIP1 | AI506816      | 1424756_at | 1439483_at   | 0.9710 |
| HIP1 | AI746468      | 1424756_at | 1439960_at   | 0.9699 |
| HIP1 | ABCC12        | 1424756_at | 1439985_at   | 0.8771 |
| HIP1 | A930024E05RIK | 1424756_at | 1440206_at   | 0.9563 |
| HIP1 | SPRY4         | 1424756_at | 1440867_at   | 0.8296 |
| HIP1 | KIF20B        | 1424756_at | 1440924_at   | 0.9244 |
| HIP1 | A430071A18RIK | 1424756_at | 1441113_at   | 0.8230 |
| HIP1 | MATR3         | 1424756_at | 1441272_at   | 0.9170 |
| HIP1 | KBTBD8        | 1424756_at | 1441275_at   | 0.9607 |
| HIP1 | NKRF          | 1424756_at | 1441325_at   | 0.9833 |
| HIP1 | AU043080      | 1424756_at | 1441375_at   | 0.9419 |
| HIP1 | ASPM          | 1424756_at | 1441520_at   | 0.9198 |
| HIP1 | D2ERTD750E    | 1424756_at | 1442280_at   | 0.8811 |
| HIP1 | TAF1D         | 1424756_at | 1442289_at   | 0.8605 |
| HIP1 | NUP188        | 1424756_at | 1442314_at   | 0.8775 |
| HIP1 | TTK           | 1424756_at | 1442594_at   | 0.9755 |
| HIP1 | AW545941      | 1424756_at | 1443007_at   | 0.8473 |
| HIP1 | BB337104      | 1424756_at | 1443026_at   | 0.8632 |
| HIP1 | BB444561      | 1424756_at | 1443171_at   | 0.9556 |
| HIP1 | BB340127      | 1424756_at | 1443230_at   | 0.8066 |
| HIP1 | BB130444      | 1424756_at | 1443410_at   | 0.8546 |
| HIP1 | BM202761      | 1424756_at | 1443800_at   | 0.8533 |
| HIP1 | ZBTB39        | 1424756_at | 1443880_at   | 0.9472 |
| HIP1 | CDK5RAP2      | 1424756_at | 1443976_at   | 0.9130 |
| HIP1 | ERCC6L        | 1424756_at | 1444024_at   | 0.9887 |
| HIP1 | AV228095      | 1424756_at | 1444443_at   | 0.9624 |
| HIP1 | 6530418L21RIK | 1424756_at | 1444723_at   | 0.9414 |
| HIP1 | MASTL         | 1424756_at | 1444725_at   | 0.9188 |

|      |               |            |              |        |
|------|---------------|------------|--------------|--------|
| HIP1 | BC023969      | 1424756_at | 1445226_at   | 0.9755 |
| HIP1 | C530044C16RIK | 1424756_at | 1445247_at   | 0.8333 |
| HIP1 | AV323315      | 1424756_at | 1445298_at   | 0.9120 |
| HIP1 | KCND3         | 1424756_at | 1447513_at   | 0.9902 |
| HIP1 | SEMA6D        | 1424756_at | 1448060_at   | 0.9231 |
| HIP1 | OGG1          | 1424756_at | 1448815_at   | 0.9492 |
| HIP1 | FOXM1         | 1424756_at | 1448834_at   | 0.9557 |
| HIP1 | SKP2          | 1424756_at | 1449293_a_at | 0.9840 |
| HIP1 | SOX4          | 1424756_at | 1449370_at   | 0.8393 |
| HIP1 | SUPT16H       | 1424756_at | 1449578_at   | 0.9286 |
| HIP1 | CCNB1         | 1424756_at | 1449675_at   | 0.9720 |
| HIP1 | LFNG          | 1424756_at | 1449943_at   | 0.9144 |
| HIP1 | APC           | 1424756_at | 1450056_at   | 0.9024 |
| HIP1 | 4933411K20RIK | 1424756_at | 1450076_at   | 0.9665 |
| HIP1 | TCERG1        | 1424756_at | 1450100_a_at | 0.9774 |
| HIP1 | ASCL1         | 1424756_at | 1450164_at   | 0.9669 |
| HIP1 | PCDHB11       | 1424756_at | 1450270_at   | 0.8214 |
| HIP1 | NPAS3         | 1424756_at | 1450287_at   | 0.8165 |
| HIP1 | ZFP354C       | 1424756_at | 1450321_at   | 0.9401 |
| HIP1 | SHC3          | 1424756_at | 1450326_at   | 0.8896 |
| HIP1 | MYBL1         | 1424756_at | 1450481_at   | 0.9253 |
| HIP1 | SOX3          | 1424756_at | 1450485_at   | 0.9719 |
| HIP1 | SALL1         | 1424756_at | 1450489_at   | 0.8486 |
| HIP1 | HMGA2         | 1424756_at | 1450780_s_at | 0.9120 |
| HIP1 | HMGA2         | 1424756_at | 1450781_at   | 0.8113 |
| HIP1 | ZNF451        | 1424756_at | 1451816_at   | 0.9051 |
| HIP1 | NCOR2         | 1424756_at | 1451841_a_at | 0.9559 |
| HIP1 | LMNB2         | 1424756_at | 1451849_a_at | 0.8975 |
| HIP1 | ZFP2          | 1424756_at | 1452025_a_at | 0.9466 |
| HIP1 | 6720460F02RIK | 1424756_at | 1452073_at   | 0.9412 |
| HIP1 | ZBED3         | 1424756_at | 1452088_at   | 0.8695 |
| HIP1 | RRP1B         | 1424756_at | 1452119_at   | 0.9186 |
| HIP1 | NOVA1         | 1424756_at | 1452245_at   | 0.8626 |
| HIP1 | PVT1          | 1424756_at | 1452324_at   | 0.8017 |
| HIP1 | CENPF         | 1424756_at | 1452334_at   | 0.9169 |
| HIP1 | ADAMTS7       | 1424756_at | 1452339_at   | 0.8370 |
| HIP1 | ASPM          | 1424756_at | 1452459_at   | 0.9530 |
| HIP1 | MLF1IP        | 1424756_at | 1452816_at   | 0.8841 |
| HIP1 | TTF2          | 1424756_at | 1452818_at   | 0.9530 |
| HIP1 | TMEM138       | 1424756_at | 1452978_at   | 0.9238 |
| HIP1 | RHOBTB3       | 1424756_at | 1453227_at   | 0.9839 |
| HIP1 | CALR3         | 1424756_at | 1453232_at   | 0.8164 |
| HIP1 | HELLS         | 1424756_at | 1453361_at   | 0.8637 |
| HIP1 | TROAP         | 1424756_at | 1453370_at   | 0.9773 |
| HIP1 | CEP55         | 1424756_at | 1453683_a_at | 0.9694 |
| HIP1 | DHX38         | 1424756_at | 1453751_at   | 0.9659 |
| HIP1 | PHF6          | 1424756_at | 1453761_at   | 0.9719 |
| HIP1 | FAM110A       | 1424756_at | 1453768_a_at | 0.8816 |
| HIP1 | NETO2         | 1424756_at | 1454032_at   | 0.8887 |
| HIP1 | CCDC77        | 1424756_at | 1454228_a_at | 0.9293 |
| HIP1 | EXOD1         | 1424756_at | 1454229_a_at | 0.9815 |

|         |                       |              |                       |        |
|---------|-----------------------|--------------|-----------------------|--------|
| HIP1    | XKR5                  | 1424756_at   | 1455127_at            | 0.8501 |
| HIP1    | UTP23                 | 1424756_at   | 1455259_a_at          | 0.9487 |
| HIP1    | ATP5G2                | 1424756_at   | 1456128_at            | 0.8531 |
| HIP1    | 2700049P18RIK         | 1424756_at   | 1456163_at            | 0.9538 |
| HIP1    | RTEL1                 | 1424756_at   | 1456729_x_at          | 0.8245 |
| HIP1    | BB053540              | 1424756_at   | 1456840_at            | 0.8827 |
| HIP1    | AV254764              | 1424756_at   | 1456951_at            | 0.8879 |
| HIP1    | TAF2                  | 1424756_at   | 1457351_at            | 0.9790 |
| HIP1    | ZNF69                 | 1424756_at   | 1458274_at            | 0.8994 |
| HIP1    | MTR                   | 1424756_at   | 1458532_at            | 0.8883 |
| HIP1    | RNF219                | 1424756_at   | 1458636_at            | 0.9731 |
| HIP1    | BB463474              | 1424756_at   | 1458902_at            | 0.8257 |
| HIP1    | 6530418L21RIK         | 1424756_at   | 1459051_at            | 0.8798 |
| HIP1    | AFFX-DapX-5_at        | 1424756_at   | AFFX-DapX-5_at        | 0.9112 |
| HIP1    | AFFX-LysX-5_at        | 1424756_at   | AFFX-LysX-5_at        | 0.8727 |
| HIP1    | AFFX-r2-Bs-dap-5_at   | 1424756_at   | AFFX-r2-Bs-dap-5_at   | 0.8994 |
| HIP1    | AFFX-r2-Bs-lys-5_at   | 1424756_at   | AFFX-r2-Bs-lys-5_at   | 0.9008 |
| HIP1    | AFFX-r2-Bs-thr-5_s_at | 1424756_at   | AFFX-r2-Bs-thr-5_s_at | 0.8879 |
| HIP1    | AFFX-ThrX-5_at        | 1424756_at   | AFFX-ThrX-5_at        | 0.8905 |
| PSRC1   | WDR62                 | 1425416_s_at | 1424849_at            | 0.8916 |
| PEG10   | WDR62                 | 1427550_at   | 1424849_at            | 0.8061 |
| CAND1   | WDR62                 | 1428649_at   | 1424849_at            | 0.9007 |
| ZNF157  | WDR62                 | 1428887_at   | 1424849_at            | 0.8566 |
| MCM8    | WDR62                 | 1429557_at   | 1424849_at            | 0.9006 |
| HELLS   | WDR62                 | 1430139_at   | 1424849_at            | 0.8794 |
| TGIF2   | WDR62                 | 1431115_at   | 1424849_at            | 0.9209 |
| ERCC4   | WDR62                 | 1432272_a_at | 1424849_at            | 0.9271 |
| SUV39H2 | WDR62                 | 1433996_at   | 1424849_at            | 0.9238 |
| PIF1    | WDR62                 | 1436738_at   | 1424849_at            | 0.8913 |
| SOX11   | WDR62                 | 1436790_a_at | 1424849_at            | 0.8221 |
| ASCL1   | WDR62                 | 1437086_at   | 1424849_at            | 0.8053 |
| RAD51C  | WDR62                 | 1438453_at   | 1424849_at            | 0.8644 |
| NKRF    | WDR62                 | 1441325_at   | 1424849_at            | 0.9679 |
| TAF1D   | WDR62                 | 1442289_at   | 1424849_at            | 0.8948 |
| FOXM1   | WDR62                 | 1448834_at   | 1424849_at            | 0.9216 |
| SUPT16H | WDR62                 | 1449578_at   | 1424849_at            | 0.9014 |
| TCERG1  | WDR62                 | 1450100_a_at | 1424849_at            | 0.9522 |
| ASCL1   | WDR62                 | 1450164_at   | 1424849_at            | 0.8980 |
| ZFP354C | WDR62                 | 1450321_at   | 1424849_at            | 0.8868 |
| MED1    | WDR62                 | 1450402_at   | 1424849_at            | 0.8810 |
| MYBL1   | WDR62                 | 1450481_at   | 1424849_at            | 0.9319 |
| SOX3    | WDR62                 | 1450485_at   | 1424849_at            | 0.9636 |
| SALL1   | WDR62                 | 1450489_at   | 1424849_at            | 0.8492 |
| HMGA2   | WDR62                 | 1450780_s_at | 1424849_at            | 0.9143 |
| HMGA2   | WDR62                 | 1450781_at   | 1424849_at            | 0.8588 |
| ZNF451  | WDR62                 | 1451816_at   | 1424849_at            | 0.9234 |
| NCOR2   | WDR62                 | 1451841_a_at | 1424849_at            | 0.8925 |
| ZFP2    | WDR62                 | 1452025_a_at | 1424849_at            | 0.8777 |
| ZBED3   | WDR62                 | 1452088_at   | 1424849_at            | 0.9133 |
| CENPF   | WDR62                 | 1452334_at   | 1424849_at            | 0.8559 |
| MLF1IP  | WDR62                 | 1452816_at   | 1424849_at            | 0.8916 |

|         |          |              |              |        |
|---------|----------|--------------|--------------|--------|
| TTF2    | WDR62    | 1452818_at   | 1424849_at   | 0.9564 |
| HELLS   | WDR62    | 1453361_at   | 1424849_at   | 0.8826 |
| PHF6    | WDR62    | 1453761_at   | 1424849_at   | 0.9361 |
| TAF2    | WDR62    | 1457351_at   | 1424849_at   | 0.9562 |
| ZNF69   | WDR62    | 1458274_at   | 1424849_at   | 0.8859 |
| PSRC1   | ATP6V0A1 | 1425416_s_at | 1425227_a_at | 0.8475 |
| ZNF157  | ATP6V0A1 | 1428887_at   | 1425227_a_at | 0.8323 |
| ERCC4   | ATP6V0A1 | 1432272_a_at | 1425227_a_at | 0.8667 |
| NKRF    | ATP6V0A1 | 1441325_at   | 1425227_a_at | 0.8428 |
| FOXM1   | ATP6V0A1 | 1448834_at   | 1425227_a_at | 0.8516 |
| TCERG1  | ATP6V0A1 | 1450100_a_at | 1425227_a_at | 0.8312 |
| ASCL1   | ATP6V0A1 | 1450164_at   | 1425227_a_at | 0.8414 |
| ZFP354C | ATP6V0A1 | 1450321_at   | 1425227_a_at | 0.8600 |
| SOX3    | ATP6V0A1 | 1450485_at   | 1425227_a_at | 0.8104 |
| NCOR2   | ATP6V0A1 | 1451841_a_at | 1425227_a_at | 0.8293 |
| ZFP2    | ATP6V0A1 | 1452025_a_at | 1425227_a_at | 0.8469 |
| CENPF   | ATP6V0A1 | 1452334_at   | 1425227_a_at | 0.8524 |
| TTF2    | ATP6V0A1 | 1452818_at   | 1425227_a_at | 0.8068 |
| PHF6    | ATP6V0A1 | 1453761_at   | 1425227_a_at | 0.8044 |
| TAF2    | ATP6V0A1 | 1457351_at   | 1425227_a_at | 0.8401 |
| PSRC1   | HUS1     | 1425416_s_at | 1425366_a_at | 0.9131 |
| CAND1   | HUS1     | 1428649_at   | 1425366_a_at | 0.8958 |
| ZNF157  | HUS1     | 1428887_at   | 1425366_a_at | 0.8530 |
| MCM8    | HUS1     | 1429557_at   | 1425366_a_at | 0.8412 |
| HELLS   | HUS1     | 1430139_at   | 1425366_a_at | 0.8651 |
| TGIF2   | HUS1     | 1431115_at   | 1425366_a_at | 0.9287 |
| ERCC4   | HUS1     | 1432272_a_at | 1425366_a_at | 0.9184 |
| SUV39H2 | HUS1     | 1433996_at   | 1425366_a_at | 0.8979 |
| PIF1    | HUS1     | 1436738_at   | 1425366_a_at | 0.8503 |
| SOX11   | HUS1     | 1436790_a_at | 1425366_a_at | 0.8221 |
| ASCL1   | HUS1     | 1437086_at   | 1425366_a_at | 0.8357 |
| RAD51C  | HUS1     | 1438453_at   | 1425366_a_at | 0.8433 |
| NKRF    | HUS1     | 1441325_at   | 1425366_a_at | 0.9406 |
| TAF1D   | HUS1     | 1442289_at   | 1425366_a_at | 0.8539 |
| FOXM1   | HUS1     | 1448834_at   | 1425366_a_at | 0.9249 |
| SUPT16H | HUS1     | 1449578_at   | 1425366_a_at | 0.8979 |
| TCERG1  | HUS1     | 1450100_a_at | 1425366_a_at | 0.9379 |
| ASCL1   | HUS1     | 1450164_at   | 1425366_a_at | 0.9005 |
| NPAS3   | HUS1     | 1450287_at   | 1425366_a_at | 0.8121 |
| ZFP354C | HUS1     | 1450321_at   | 1425366_a_at | 0.8568 |
| MED1    | HUS1     | 1450402_at   | 1425366_a_at | 0.8076 |
| MYBL1   | HUS1     | 1450481_at   | 1425366_a_at | 0.9129 |
| SOX3    | HUS1     | 1450485_at   | 1425366_a_at | 0.9028 |
| SALL1   | HUS1     | 1450489_at   | 1425366_a_at | 0.8258 |
| HMGA2   | HUS1     | 1450780_s_at | 1425366_a_at | 0.8767 |
| ZNF451  | HUS1     | 1451816_at   | 1425366_a_at | 0.8864 |
| NCOR2   | HUS1     | 1451841_a_at | 1425366_a_at | 0.8876 |
| ZFP2    | HUS1     | 1452025_a_at | 1425366_a_at | 0.8859 |
| ZBED3   | HUS1     | 1452088_at   | 1425366_a_at | 0.8458 |
| CENPF   | HUS1     | 1452334_at   | 1425366_a_at | 0.8888 |
| MLF1IP  | HUS1     | 1452816_at   | 1425366_a_at | 0.8801 |

|       |               |              |              |        |
|-------|---------------|--------------|--------------|--------|
| TTF2  | HUS1          | 1452818_at   | 1425366_a_at | 0.9363 |
| HELLS | HUS1          | 1453361_at   | 1425366_a_at | 0.8086 |
| PHF6  | HUS1          | 1453761_at   | 1425366_a_at | 0.9423 |
| TAF2  | HUS1          | 1457351_at   | 1425366_a_at | 0.9468 |
| ZNF69 | HUS1          | 1458274_at   | 1425366_a_at | 0.8626 |
| PSRC1 | MARK1         | 1425416_s_at | 1425509_at   | 0.8019 |
| PSRC1 | CD109         | 1425416_s_at | 1425658_at   | 0.9600 |
| PSRC1 | CCDC77        | 1425416_s_at | 1425734_a_at | 0.9203 |
| PSRC1 | FANCI         | 1425416_s_at | 1425941_a_at | 0.9344 |
| PSRC1 | CDC7          | 1425416_s_at | 1426021_a_at | 0.9624 |
| PSRC1 | PVT1          | 1425416_s_at | 1427140_at   | 0.9078 |
| PSRC1 | RG9MTD2       | 1425416_s_at | 1427375_at   | 0.9211 |
| PSRC1 | FANCI         | 1425416_s_at | 1427953_at   | 0.9296 |
| PSRC1 | SRGAP2        | 1425416_s_at | 1427967_at   | 0.9836 |
| PSRC1 | CAND1         | 1425416_s_at | 1428649_at   | 0.9506 |
| PSRC1 | ZNF157        | 1425416_s_at | 1428887_at   | 0.9766 |
| PSRC1 | RASL11A       | 1425416_s_at | 1429444_at   | 0.9245 |
| PSRC1 | MCM8          | 1425416_s_at | 1429557_at   | 0.8470 |
| PSRC1 | SMC2          | 1425416_s_at | 1429659_at   | 0.9172 |
| PSRC1 | 6230416J20RIK | 1425416_s_at | 1429665_at   | 0.9258 |
| PSRC1 | 4632434I11RIK | 1425416_s_at | 1429734_at   | 0.9778 |
| PSRC1 | HELLS         | 1425416_s_at | 1430139_at   | 0.8878 |
| PSRC1 | CEP70         | 1425416_s_at | 1430231_a_at | 0.9626 |
| PSRC1 | NUP205        | 1425416_s_at | 1430343_at   | 0.8834 |
| PSRC1 | TLE4          | 1425416_s_at | 1430384_at   | 0.8786 |
| PSRC1 | NCAPD3        | 1425416_s_at | 1430782_at   | 0.8420 |
| PSRC1 | TGIF2         | 1425416_s_at | 1431115_at   | 0.8770 |
| PSRC1 | PGAP1         | 1425416_s_at | 1431169_at   | 0.9056 |
| PSRC1 | DLG5          | 1425416_s_at | 1431187_s_at | 0.9166 |
| PSRC1 | PVT1          | 1425416_s_at | 1431352_s_at | 0.9085 |
| PSRC1 | JAM2          | 1425416_s_at | 1431416_a_at | 0.8628 |
| PSRC1 | 4933432K03RIK | 1425416_s_at | 1431489_at   | 0.8081 |
| PSRC1 | 2610021K21RIK | 1425416_s_at | 1431667_s_at | 0.8758 |
| PSRC1 | RAB31         | 1425416_s_at | 1431691_a_at | 0.9402 |
| PSRC1 | PIGN          | 1425416_s_at | 1432115_a_at | 0.9307 |
| PSRC1 | ERCC4         | 1425416_s_at | 1432272_a_at | 0.9834 |
| PSRC1 | ARMC9         | 1425416_s_at | 1432383_a_at | 0.9781 |
| PSRC1 | 1700106N22RIK | 1425416_s_at | 1432504_at   | 0.8976 |
| PSRC1 | SUV39H2       | 1425416_s_at | 1433996_at   | 0.8742 |
| PSRC1 | NPHP4         | 1425416_s_at | 1434024_at   | 0.9456 |
| PSRC1 | SRGAP2        | 1425416_s_at | 1434407_at   | 0.8874 |
| PSRC1 | SOX3          | 1425416_s_at | 1435192_at   | 0.8078 |
| PSRC1 | EXOD1         | 1425416_s_at | 1435390_at   | 0.8574 |
| PSRC1 | CD109         | 1425416_s_at | 1436346_at   | 0.9470 |
| PSRC1 | CEP78         | 1425416_s_at | 1436352_at   | 0.8331 |
| PSRC1 | ZBTB12        | 1425416_s_at | 1436382_at   | 0.8582 |
| PSRC1 | SDC3          | 1425416_s_at | 1436482_a_at | 0.8882 |
| PSRC1 | PIF1          | 1425416_s_at | 1436738_at   | 0.8340 |
| PSRC1 | SOX11         | 1425416_s_at | 1436790_a_at | 0.9114 |
| PSRC1 | ASCL1         | 1425416_s_at | 1437086_at   | 0.8846 |
| PSRC1 | LRRC4B        | 1425416_s_at | 1437183_at   | 0.8162 |



|       |               |              |              |        |
|-------|---------------|--------------|--------------|--------|
| PSRC1 | 281040811RIK  | 1425416_s_at | 1437549_at   | 0.9066 |
| PSRC1 | AV164956      | 1425416_s_at | 1437673_at   | 0.9139 |
| PSRC1 | HEATR5B       | 1425416_s_at | 1438085_at   | 0.9200 |
| PSRC1 | 4933432K03RIK | 1425416_s_at | 1438356_x_at | 0.9391 |
| PSRC1 | RAD51C        | 1425416_s_at | 1438453_at   | 0.8872 |
| PSRC1 | DHX33         | 1425416_s_at | 1438765_at   | 0.9544 |
| PSRC1 | AHI1          | 1425416_s_at | 1439083_at   | 0.8654 |
| PSRC1 | FANCD2        | 1425416_s_at | 1439091_at   | 0.8932 |
| PSRC1 | AI506816      | 1425416_s_at | 1439483_at   | 0.9955 |
| PSRC1 | AI746468      | 1425416_s_at | 1439960_at   | 0.9181 |
| PSRC1 | ABCC12        | 1425416_s_at | 1439985_at   | 0.8499 |
| PSRC1 | A930024E05RIK | 1425416_s_at | 1440206_at   | 0.9553 |
| PSRC1 | WDR35         | 1425416_s_at | 1440318_at   | 0.8113 |
| PSRC1 | SPRY4         | 1425416_s_at | 1440867_at   | 0.8035 |
| PSRC1 | KIF20B        | 1425416_s_at | 1440924_at   | 0.8585 |
| PSRC1 | MATR3         | 1425416_s_at | 1441272_at   | 0.8450 |
| PSRC1 | KBTBD8        | 1425416_s_at | 1441275_at   | 0.9256 |
| PSRC1 | NKRF          | 1425416_s_at | 1441325_at   | 0.9441 |
| PSRC1 | AU043080      | 1425416_s_at | 1441375_at   | 0.9152 |
| PSRC1 | ASPM          | 1425416_s_at | 1441520_at   | 0.9251 |
| PSRC1 | D2ERTD750E    | 1425416_s_at | 1442280_at   | 0.8827 |
| PSRC1 | NUP188        | 1425416_s_at | 1442314_at   | 0.8074 |
| PSRC1 | TTK           | 1425416_s_at | 1442594_at   | 0.9719 |
| PSRC1 | AW545941      | 1425416_s_at | 1443007_at   | 0.8009 |
| PSRC1 | BB337104      | 1425416_s_at | 1443026_at   | 0.8841 |
| PSRC1 | BB444561      | 1425416_s_at | 1443171_at   | 0.9347 |
| PSRC1 | BB340127      | 1425416_s_at | 1443230_at   | 0.8348 |
| PSRC1 | BB130444      | 1425416_s_at | 1443410_at   | 0.9273 |
| PSRC1 | ZBTB39        | 1425416_s_at | 1443880_at   | 0.9331 |
| PSRC1 | CDK5RAP2      | 1425416_s_at | 1443976_at   | 0.9024 |
| PSRC1 | ERCC6L        | 1425416_s_at | 1444024_at   | 0.9661 |
| PSRC1 | AV228095      | 1425416_s_at | 1444443_at   | 0.9244 |
| PSRC1 | 6530418L21RIK | 1425416_s_at | 1444723_at   | 0.9796 |
| PSRC1 | MASTL         | 1425416_s_at | 1444725_at   | 0.8650 |
| PSRC1 | BC023969      | 1425416_s_at | 1445226_at   | 0.9931 |
| PSRC1 | AV323315      | 1425416_s_at | 1445298_at   | 0.9038 |
| PSRC1 | KCND3         | 1425416_s_at | 1447513_at   | 0.9803 |
| PSRC1 | SEMA6D        | 1425416_s_at | 1448060_at   | 0.9051 |
| PSRC1 | OGG1          | 1425416_s_at | 1448815_at   | 0.8888 |
| PSRC1 | FOXM1         | 1425416_s_at | 1448834_at   | 0.9411 |
| PSRC1 | SKP2          | 1425416_s_at | 1449293_a_at | 0.9645 |
| PSRC1 | SOX4          | 1425416_s_at | 1449370_at   | 0.8767 |
| PSRC1 | SUPT16H       | 1425416_s_at | 1449578_at   | 0.9108 |
| PSRC1 | CCNB1         | 1425416_s_at | 1449675_at   | 0.9455 |
| PSRC1 | LFNG          | 1425416_s_at | 1449943_at   | 0.9314 |
| PSRC1 | APC           | 1425416_s_at | 1450056_at   | 0.8652 |
| PSRC1 | 4933411K20RIK | 1425416_s_at | 1450076_at   | 0.9545 |
| PSRC1 | TCERG1        | 1425416_s_at | 1450100_a_at | 0.9442 |
| PSRC1 | ASCL1         | 1425416_s_at | 1450164_at   | 0.9774 |
| PSRC1 | PCDHB11       | 1425416_s_at | 1450270_at   | 0.8731 |
| PSRC1 | NPAS3         | 1425416_s_at | 1450287_at   | 0.8025 |

|       |                       |              |                       |        |
|-------|-----------------------|--------------|-----------------------|--------|
| PSRC1 | ZFP354C               | 1425416_s_at | 1450321_at            | 0.9454 |
| PSRC1 | SHC3                  | 1425416_s_at | 1450326_at            | 0.8637 |
| PSRC1 | MYBL1                 | 1425416_s_at | 1450481_at            | 0.8583 |
| PSRC1 | SOX3                  | 1425416_s_at | 1450485_at            | 0.9403 |
| PSRC1 | HMGA2                 | 1425416_s_at | 1450780_s_at          | 0.8484 |
| PSRC1 | ZNF451                | 1425416_s_at | 1451816_at            | 0.8278 |
| PSRC1 | NCOR2                 | 1425416_s_at | 1451841_a_at          | 0.9806 |
| PSRC1 | LMNB2                 | 1425416_s_at | 1451849_a_at          | 0.8480 |
| PSRC1 | ZFP2                  | 1425416_s_at | 1452025_a_at          | 0.9511 |
| PSRC1 | 6720460F02RIK         | 1425416_s_at | 1452073_at            | 0.9440 |
| PSRC1 | RRP1B                 | 1425416_s_at | 1452119_at            | 0.8880 |
| PSRC1 | NOVA1                 | 1425416_s_at | 1452245_at            | 0.9108 |
| PSRC1 | PVT1                  | 1425416_s_at | 1452324_at            | 0.8231 |
| PSRC1 | CENPF                 | 1425416_s_at | 1452334_at            | 0.9497 |
| PSRC1 | ADAMTS7               | 1425416_s_at | 1452339_at            | 0.8796 |
| PSRC1 | ASPM                  | 1425416_s_at | 1452459_at            | 0.9532 |
| PSRC1 | MLF1IP                | 1425416_s_at | 1452816_at            | 0.8082 |
| PSRC1 | TTF2                  | 1425416_s_at | 1452818_at            | 0.8942 |
| PSRC1 | TMEM138               | 1425416_s_at | 1452978_at            | 0.8323 |
| PSRC1 | RHOBTB3               | 1425416_s_at | 1453227_at            | 0.9915 |
| PSRC1 | CALR3                 | 1425416_s_at | 1453232_at            | 0.9133 |
| PSRC1 | TROAP                 | 1425416_s_at | 1453370_at            | 0.9289 |
| PSRC1 | CEP55                 | 1425416_s_at | 1453683_a_at          | 0.9420 |
| PSRC1 | DHX38                 | 1425416_s_at | 1453751_at            | 0.9419 |
| PSRC1 | PHF6                  | 1425416_s_at | 1453761_at            | 0.9534 |
| PSRC1 | FAM110A               | 1425416_s_at | 1453768_a_at          | 0.8774 |
| PSRC1 | NETO2                 | 1425416_s_at | 1454032_at            | 0.8970 |
| PSRC1 | CCDC77                | 1425416_s_at | 1454228_a_at          | 0.8808 |
| PSRC1 | EXOD1                 | 1425416_s_at | 1454229_a_at          | 0.9750 |
| PSRC1 | XKR5                  | 1425416_s_at | 1455127_at            | 0.8358 |
| PSRC1 | UTP23                 | 1425416_s_at | 1455259_a_at          | 0.9186 |
| PSRC1 | BM114403              | 1425416_s_at | 1455624_at            | 0.8093 |
| PSRC1 | ATP5G2                | 1425416_s_at | 1456128_at            | 0.8973 |
| PSRC1 | 2700049P18RIK         | 1425416_s_at | 1456163_at            | 0.9037 |
| PSRC1 | BB053540              | 1425416_s_at | 1456840_at            | 0.8656 |
| PSRC1 | AV254764              | 1425416_s_at | 1456951_at            | 0.8484 |
| PSRC1 | TAF2                  | 1425416_s_at | 1457351_at            | 0.9406 |
| PSRC1 | ZNF69                 | 1425416_s_at | 1458274_at            | 0.8393 |
| PSRC1 | BM224051              | 1425416_s_at | 1458630_at            | 0.8617 |
| PSRC1 | RNF219                | 1425416_s_at | 1458636_at            | 0.9572 |
| PSRC1 | 6530418L21RIK         | 1425416_s_at | 1459051_at            | 0.9347 |
| PSRC1 | BB527979              | 1425416_s_at | 1459950_at            | 0.8070 |
| PSRC1 | AFFX-DapX-5_at        | 1425416_s_at | AFFX-DapX-5_at        | 0.9306 |
| PSRC1 | AFFX-LysX-5_at        | 1425416_s_at | AFFX-LysX-5_at        | 0.8840 |
| PSRC1 | AFFX-PheX-5_at        | 1425416_s_at | AFFX-PheX-5_at        | 0.8176 |
| PSRC1 | AFFX-r2-Bs-dap-5_at   | 1425416_s_at | AFFX-r2-Bs-dap-5_at   | 0.9188 |
| PSRC1 | AFFX-r2-Bs-lys-5_at   | 1425416_s_at | AFFX-r2-Bs-lys-5_at   | 0.9092 |
| PSRC1 | AFFX-r2-Bs-thr-5_s_at | 1425416_s_at | AFFX-r2-Bs-thr-5_s_at | 0.9165 |
| PSRC1 | AFFX-ThrX-5_at        | 1425416_s_at | AFFX-ThrX-5_at        | 0.9273 |
| ERCC4 | MARK1                 | 1432272_a_at | 1425509_at            | 0.8203 |
| SOX11 | MARK1                 | 1436790_a_at | 1425509_at            | 0.8733 |

|         |        |              |              |        |
|---------|--------|--------------|--------------|--------|
| ZFP354C | MARK1  | 1450321_at   | 1425509_at   | 0.8248 |
| NCOR2   | MARK1  | 1451841_a_at | 1425509_at   | 0.8043 |
| CAND1   | CD109  | 1428649_at   | 1425658_at   | 0.9779 |
| ZNF157  | CD109  | 1428887_at   | 1425658_at   | 0.9158 |
| MCM8    | CD109  | 1429557_at   | 1425658_at   | 0.9226 |
| HELLS   | CD109  | 1430139_at   | 1425658_at   | 0.9159 |
| TGIF2   | CD109  | 1431115_at   | 1425658_at   | 0.9247 |
| ERCC4   | CD109  | 1432272_a_at | 1425658_at   | 0.9667 |
| SUV39H2 | CD109  | 1433996_at   | 1425658_at   | 0.9273 |
| PIF1    | CD109  | 1436738_at   | 1425658_at   | 0.9238 |
| SOX11   | CD109  | 1436790_a_at | 1425658_at   | 0.8759 |
| ASCL1   | CD109  | 1437086_at   | 1425658_at   | 0.8516 |
| RAD51C  | CD109  | 1438453_at   | 1425658_at   | 0.9212 |
| NKRF    | CD109  | 1441325_at   | 1425658_at   | 0.9828 |
| TAF1D   | CD109  | 1442289_at   | 1425658_at   | 0.9116 |
| FOXM1   | CD109  | 1448834_at   | 1425658_at   | 0.9392 |
| SOX4    | CD109  | 1449370_at   | 1425658_at   | 0.8312 |
| SUPT16H | CD109  | 1449578_at   | 1425658_at   | 0.9499 |
| TCERG1  | CD109  | 1450100_a_at | 1425658_at   | 0.9830 |
| ASCL1   | CD109  | 1450164_at   | 1425658_at   | 0.9517 |
| ZFP354C | CD109  | 1450321_at   | 1425658_at   | 0.8984 |
| MED1    | CD109  | 1450402_at   | 1425658_at   | 0.8302 |
| MYBL1   | CD109  | 1450481_at   | 1425658_at   | 0.9551 |
| SOX3    | CD109  | 1450485_at   | 1425658_at   | 0.9739 |
| SALL1   | CD109  | 1450489_at   | 1425658_at   | 0.8613 |
| HMGA2   | CD109  | 1450780_s_at | 1425658_at   | 0.9394 |
| HMGA2   | CD109  | 1450781_at   | 1425658_at   | 0.8725 |
| ZNF451  | CD109  | 1451816_at   | 1425658_at   | 0.9468 |
| NCOR2   | CD109  | 1451841_a_at | 1425658_at   | 0.9459 |
| ZFP2    | CD109  | 1452025_a_at | 1425658_at   | 0.9367 |
| ZBED3   | CD109  | 1452088_at   | 1425658_at   | 0.9128 |
| CENPF   | CD109  | 1452334_at   | 1425658_at   | 0.8916 |
| MLF1IP  | CD109  | 1452816_at   | 1425658_at   | 0.9121 |
| TTF2    | CD109  | 1452818_at   | 1425658_at   | 0.9624 |
| HELLS   | CD109  | 1453361_at   | 1425658_at   | 0.8797 |
| PHF6    | CD109  | 1453761_at   | 1425658_at   | 0.9936 |
| TAF2    | CD109  | 1457351_at   | 1425658_at   | 0.9820 |
| ZNF69   | CD109  | 1458274_at   | 1425658_at   | 0.8874 |
| PEG10   | CCDC77 | 1427550_at   | 1425734_a_at | 0.8281 |
| CAND1   | CCDC77 | 1428649_at   | 1425734_a_at | 0.9579 |
| ZNF157  | CCDC77 | 1428887_at   | 1425734_a_at | 0.8645 |
| MCM8    | CCDC77 | 1429557_at   | 1425734_a_at | 0.9086 |
| HELLS   | CCDC77 | 1430139_at   | 1425734_a_at | 0.8909 |
| TGIF2   | CCDC77 | 1431115_at   | 1425734_a_at | 0.9139 |
| ERCC4   | CCDC77 | 1432272_a_at | 1425734_a_at | 0.9235 |
| SUV39H2 | CCDC77 | 1433996_at   | 1425734_a_at | 0.9040 |
| PIF1    | CCDC77 | 1436738_at   | 1425734_a_at | 0.9319 |
| SOX11   | CCDC77 | 1436790_a_at | 1425734_a_at | 0.8200 |
| ASCL1   | CCDC77 | 1437086_at   | 1425734_a_at | 0.8339 |
| RAD51C  | CCDC77 | 1438453_at   | 1425734_a_at | 0.9066 |
| NKRF    | CCDC77 | 1441325_at   | 1425734_a_at | 0.9598 |

|         |        |              |              |        |
|---------|--------|--------------|--------------|--------|
| TAF1D   | CCDC77 | 1442289_at   | 1425734_a_at | 0.9313 |
| FOXMI   | CCDC77 | 1448834_at   | 1425734_a_at | 0.9007 |
| SUPT16H | CCDC77 | 1449578_at   | 1425734_a_at | 0.9273 |
| TCERG1  | CCDC77 | 1450100_a_at | 1425734_a_at | 0.9616 |
| ASCL1   | CCDC77 | 1450164_at   | 1425734_a_at | 0.9191 |
| ZFP354C | CCDC77 | 1450321_at   | 1425734_a_at | 0.8418 |
| MED1    | CCDC77 | 1450402_at   | 1425734_a_at | 0.8535 |
| MYBL1   | CCDC77 | 1450481_at   | 1425734_a_at | 0.9551 |
| SOX3    | CCDC77 | 1450485_at   | 1425734_a_at | 0.9530 |
| SALL1   | CCDC77 | 1450489_at   | 1425734_a_at | 0.8450 |
| HMGA2   | CCDC77 | 1450780_s_at | 1425734_a_at | 0.9450 |
| HMGA2   | CCDC77 | 1450781_at   | 1425734_a_at | 0.8984 |
| ZNF451  | CCDC77 | 1451816_at   | 1425734_a_at | 0.9549 |
| NCOR2   | CCDC77 | 1451841_a_at | 1425734_a_at | 0.9089 |
| ZFP2    | CCDC77 | 1452025_a_at | 1425734_a_at | 0.9068 |
| ZBED3   | CCDC77 | 1452088_at   | 1425734_a_at | 0.9255 |
| CENPF   | CCDC77 | 1452334_at   | 1425734_a_at | 0.8540 |
| MLF1IP  | CCDC77 | 1452816_at   | 1425734_a_at | 0.9183 |
| TTF2    | CCDC77 | 1452818_at   | 1425734_a_at | 0.9577 |
| HELLS   | CCDC77 | 1453361_at   | 1425734_a_at | 0.8866 |
| PHF6    | CCDC77 | 1453761_at   | 1425734_a_at | 0.9781 |
| TAF2    | CCDC77 | 1457351_at   | 1425734_a_at | 0.9627 |
| ZNF69   | CCDC77 | 1458274_at   | 1425734_a_at | 0.8778 |
| CAND1   | FANCI  | 1428649_at   | 1425941_a_at | 0.9117 |
| ZNF157  | FANCI  | 1428887_at   | 1425941_a_at | 0.8897 |
| MCM8    | FANCI  | 1429557_at   | 1425941_a_at | 0.8983 |
| HELLS   | FANCI  | 1430139_at   | 1425941_a_at | 0.8983 |
| TLE4    | FANCI  | 1430384_at   | 1425941_a_at | 0.8026 |
| TGIF2   | FANCI  | 1431115_at   | 1425941_a_at | 0.8838 |
| ERCC4   | FANCI  | 1432272_a_at | 1425941_a_at | 0.9595 |
| SUV39H2 | FANCI  | 1433996_at   | 1425941_a_at | 0.9410 |
| PIF1    | FANCI  | 1436738_at   | 1425941_a_at | 0.8728 |
| SOX11   | FANCI  | 1436790_a_at | 1425941_a_at | 0.8787 |
| ASCL1   | FANCI  | 1437086_at   | 1425941_a_at | 0.8346 |
| RAD51C  | FANCI  | 1438453_at   | 1425941_a_at | 0.9129 |
| NKRF    | FANCI  | 1441325_at   | 1425941_a_at | 0.9832 |
| TAF1D   | FANCI  | 1442289_at   | 1425941_a_at | 0.8693 |
| FOXMI   | FANCI  | 1448834_at   | 1425941_a_at | 0.9253 |
| SOX4    | FANCI  | 1449370_at   | 1425941_a_at | 0.8195 |
| SUPT16H | FANCI  | 1449578_at   | 1425941_a_at | 0.9284 |
| TCERG1  | FANCI  | 1450100_a_at | 1425941_a_at | 0.9826 |
| ASCL1   | FANCI  | 1450164_at   | 1425941_a_at | 0.9329 |
| ZFP354C | FANCI  | 1450321_at   | 1425941_a_at | 0.9152 |
| MED1    | FANCI  | 1450402_at   | 1425941_a_at | 0.8470 |
| MYBL1   | FANCI  | 1450481_at   | 1425941_a_at | 0.9425 |
| SOX3    | FANCI  | 1450485_at   | 1425941_a_at | 0.9424 |
| SALL1   | FANCI  | 1450489_at   | 1425941_a_at | 0.8215 |
| HMGA2   | FANCI  | 1450780_s_at | 1425941_a_at | 0.9078 |
| ZNF451  | FANCI  | 1451816_at   | 1425941_a_at | 0.9025 |
| NCOR2   | FANCI  | 1451841_a_at | 1425941_a_at | 0.9019 |
| ZFP2    | FANCI  | 1452025_a_at | 1425941_a_at | 0.9077 |

|         |       |              |              |        |
|---------|-------|--------------|--------------|--------|
| ZBED3   | FANCI | 1452088_at   | 1425941_a_at | 0.8730 |
| CENPF   | FANCI | 1452334_at   | 1425941_a_at | 0.9316 |
| MLF1IP  | FANCI | 1452816_at   | 1425941_a_at | 0.9019 |
| TTF2    | FANCI | 1452818_at   | 1425941_a_at | 0.9480 |
| HELLS   | FANCI | 1453361_at   | 1425941_a_at | 0.8307 |
| PHF6    | FANCI | 1453761_at   | 1425941_a_at | 0.9631 |
| TAF2    | FANCI | 1457351_at   | 1425941_a_at | 0.9870 |
| ZNF69   | FANCI | 1458274_at   | 1425941_a_at | 0.9178 |
| CAND1   | CDC7  | 1428649_at   | 1426021_a_at | 0.9784 |
| ZNF157  | CDC7  | 1428887_at   | 1426021_a_at | 0.9064 |
| MCM8    | CDC7  | 1429557_at   | 1426021_a_at | 0.9040 |
| HELLS   | CDC7  | 1430139_at   | 1426021_a_at | 0.9000 |
| TLE4    | CDC7  | 1430384_at   | 1426021_a_at | 0.8122 |
| TGIF2   | CDC7  | 1431115_at   | 1426021_a_at | 0.9017 |
| ERCC4   | CDC7  | 1432272_a_at | 1426021_a_at | 0.9606 |
| SUV39H2 | CDC7  | 1433996_at   | 1426021_a_at | 0.9145 |
| PIF1    | CDC7  | 1436738_at   | 1426021_a_at | 0.8990 |
| SOX11   | CDC7  | 1436790_a_at | 1426021_a_at | 0.8865 |
| ASCL1   | CDC7  | 1437086_at   | 1426021_a_at | 0.8326 |
| RAD51C  | CDC7  | 1438453_at   | 1426021_a_at | 0.9062 |
| NKRF    | CDC7  | 1441325_at   | 1426021_a_at | 0.9676 |
| TAF1D   | CDC7  | 1442289_at   | 1426021_a_at | 0.8755 |
| FOXM1   | CDC7  | 1448834_at   | 1426021_a_at | 0.9249 |
| SOX4    | CDC7  | 1449370_at   | 1426021_a_at | 0.8272 |
| SUPT16H | CDC7  | 1449578_at   | 1426021_a_at | 0.9374 |
| TCERG1  | CDC7  | 1450100_a_at | 1426021_a_at | 0.9638 |
| ASCL1   | CDC7  | 1450164_at   | 1426021_a_at | 0.9443 |
| ZFP354C | CDC7  | 1450321_at   | 1426021_a_at | 0.8852 |
| MYBL1   | CDC7  | 1450481_at   | 1426021_a_at | 0.9326 |
| SOX3    | CDC7  | 1450485_at   | 1426021_a_at | 0.9542 |
| SALL1   | CDC7  | 1450489_at   | 1426021_a_at | 0.8257 |
| HMGA2   | CDC7  | 1450780_s_at | 1426021_a_at | 0.9072 |
| HMGA2   | CDC7  | 1450781_at   | 1426021_a_at | 0.8289 |
| ZNF451  | CDC7  | 1451816_at   | 1426021_a_at | 0.9139 |
| NCOR2   | CDC7  | 1451841_a_at | 1426021_a_at | 0.9488 |
| ZFP2    | CDC7  | 1452025_a_at | 1426021_a_at | 0.9267 |
| ZBED3   | CDC7  | 1452088_at   | 1426021_a_at | 0.8698 |
| CENPF   | CDC7  | 1452334_at   | 1426021_a_at | 0.9075 |
| MLF1IP  | CDC7  | 1452816_at   | 1426021_a_at | 0.9007 |
| TTF2    | CDC7  | 1452818_at   | 1426021_a_at | 0.9372 |
| HELLS   | CDC7  | 1453361_at   | 1426021_a_at | 0.8416 |
| PHF6    | CDC7  | 1453761_at   | 1426021_a_at | 0.9839 |
| TAF2    | CDC7  | 1457351_at   | 1426021_a_at | 0.9665 |
| ZNF69   | CDC7  | 1458274_at   | 1426021_a_at | 0.8639 |
| CAND1   | PVT1  | 1428649_at   | 1427140_at   | 0.9023 |
| ZNF157  | PVT1  | 1428887_at   | 1427140_at   | 0.8833 |
| HELLS   | PVT1  | 1430139_at   | 1427140_at   | 0.8474 |
| ERCC4   | PVT1  | 1432272_a_at | 1427140_at   | 0.8964 |
| SUV39H2 | PVT1  | 1433996_at   | 1427140_at   | 0.8656 |
| SOX11   | PVT1  | 1436790_a_at | 1427140_at   | 0.9557 |
| RAD51C  | PVT1  | 1438453_at   | 1427140_at   | 0.8582 |

|         |         |              |            |        |
|---------|---------|--------------|------------|--------|
| NKRF    | PVT1    | 1441325_at   | 1427140_at | 0.8635 |
| FOXMI   | PVT1    | 1448834_at   | 1427140_at | 0.8280 |
| SOX4    | PVT1    | 1449370_at   | 1427140_at | 0.9106 |
| SUPT16H | PVT1    | 1449578_at   | 1427140_at | 0.9165 |
| TCERG1  | PVT1    | 1450100_a_at | 1427140_at | 0.8833 |
| ASCL1   | PVT1    | 1450164_at   | 1427140_at | 0.8731 |
| ZFP354C | PVT1    | 1450321_at   | 1427140_at | 0.8462 |
| SOX3    | PVT1    | 1450485_at   | 1427140_at | 0.8645 |
| PA2G4   | PVT1    | 1450854_at   | 1427140_at | 0.8056 |
| NCOR2   | PVT1    | 1451841_a_at | 1427140_at | 0.8881 |
| ZFP2    | PVT1    | 1452025_a_at | 1427140_at | 0.8778 |
| CENPF   | PVT1    | 1452334_at   | 1427140_at | 0.8565 |
| PHF6    | PVT1    | 1453761_at   | 1427140_at | 0.8766 |
| TAF2    | PVT1    | 1457351_at   | 1427140_at | 0.8569 |
| CAND1   | RG9MTD2 | 1428649_at   | 1427375_at | 0.9497 |
| ZNF157  | RG9MTD2 | 1428887_at   | 1427375_at | 0.8642 |
| MCM8    | RG9MTD2 | 1429557_at   | 1427375_at | 0.8968 |
| HELLS   | RG9MTD2 | 1430139_at   | 1427375_at | 0.8951 |
| TGIF2   | RG9MTD2 | 1431115_at   | 1427375_at | 0.8638 |
| ERCC4   | RG9MTD2 | 1432272_a_at | 1427375_at | 0.9213 |
| SUV39H2 | RG9MTD2 | 1433996_at   | 1427375_at | 0.9351 |
| PIF1    | RG9MTD2 | 1436738_at   | 1427375_at | 0.8867 |
| SOX11   | RG9MTD2 | 1436790_a_at | 1427375_at | 0.8702 |
| ASCL1   | RG9MTD2 | 1437086_at   | 1427375_at | 0.8161 |
| RAD51C  | RG9MTD2 | 1438453_at   | 1427375_at | 0.9207 |
| NKRF    | RG9MTD2 | 1441325_at   | 1427375_at | 0.9336 |
| TAF1D   | RG9MTD2 | 1442289_at   | 1427375_at | 0.8847 |
| FOXMI   | RG9MTD2 | 1448834_at   | 1427375_at | 0.8932 |
| SOX4    | RG9MTD2 | 1449370_at   | 1427375_at | 0.8553 |
| SUPT16H | RG9MTD2 | 1449578_at   | 1427375_at | 0.9513 |
| TCERG1  | RG9MTD2 | 1450100_a_at | 1427375_at | 0.9463 |
| ASCL1   | RG9MTD2 | 1450164_at   | 1427375_at | 0.9095 |
| ZFP354C | RG9MTD2 | 1450321_at   | 1427375_at | 0.8363 |
| MYBL1   | RG9MTD2 | 1450481_at   | 1427375_at | 0.9329 |
| SOX3    | RG9MTD2 | 1450485_at   | 1427375_at | 0.9169 |
| SALL1   | RG9MTD2 | 1450489_at   | 1427375_at | 0.8253 |
| HMGA2   | RG9MTD2 | 1450780_s_at | 1427375_at | 0.9013 |
| HMGA2   | RG9MTD2 | 1450781_at   | 1427375_at | 0.8321 |
| ZNF451  | RG9MTD2 | 1451816_at   | 1427375_at | 0.9092 |
| NCOR2   | RG9MTD2 | 1451841_a_at | 1427375_at | 0.8975 |
| ZFP2    | RG9MTD2 | 1452025_a_at | 1427375_at | 0.9172 |
| ZBED3   | RG9MTD2 | 1452088_at   | 1427375_at | 0.8624 |
| CENPF   | RG9MTD2 | 1452334_at   | 1427375_at | 0.8725 |
| MLF1IP  | RG9MTD2 | 1452816_at   | 1427375_at | 0.8877 |
| TTF2    | RG9MTD2 | 1452818_at   | 1427375_at | 0.8907 |
| HELLS   | RG9MTD2 | 1453361_at   | 1427375_at | 0.8349 |
| PHF6    | RG9MTD2 | 1453761_at   | 1427375_at | 0.9589 |
| TAF2    | RG9MTD2 | 1457351_at   | 1427375_at | 0.9345 |
| ZNF69   | RG9MTD2 | 1458274_at   | 1427375_at | 0.8335 |
| PEG10   | SPDYA   | 1427550_at   | 1429470_at | 0.8183 |
| PEG10   | MCM8    | 1427550_at   | 1429557_at | 0.8203 |

|       |               |            |              |        |
|-------|---------------|------------|--------------|--------|
| PEG10 | NCAPD3        | 1427550_at | 1430782_at   | 0.8174 |
| PEG10 | RCBTB2        | 1427550_at | 1431017_at   | 0.9105 |
| PEG10 | MPHOSPH9      | 1427550_at | 1431053_at   | 0.8581 |
| PEG10 | MATR3         | 1427550_at | 1431235_at   | 0.9758 |
| PEG10 | 4933432K03RIK | 1427550_at | 1431489_at   | 0.9089 |
| PEG10 | PPIH          | 1427550_at | 1431505_at   | 0.8882 |
| PEG10 | 2610021K21RIK | 1427550_at | 1431667_s_at | 0.8201 |
| PEG10 | PIGN          | 1427550_at | 1432115_a_at | 0.8097 |
| PEG10 | MIPOL1        | 1427550_at | 1432284_at   | 0.9756 |
| PEG10 | THG1L         | 1427550_at | 1432393_a_at | 0.9341 |
| PEG10 | TROAP         | 1427550_at | 1433790_at   | 0.8438 |
| PEG10 | SUV39H2       | 1427550_at | 1433996_at   | 0.8109 |
| PEG10 | GEMIN5        | 1427550_at | 1436311_at   | 0.8702 |
| PEG10 | ZBTB12        | 1427550_at | 1436382_at   | 0.9179 |
| PEG10 | PPP1R14B      | 1427550_at | 1436716_at   | 0.9259 |
| PEG10 | PIF1          | 1427550_at | 1436738_at   | 0.8918 |
| PEG10 | 2810408I11RIK | 1427550_at | 1437549_at   | 0.8714 |
| PEG10 | PIGT          | 1427550_at | 1437594_x_at | 0.9300 |
| PEG10 | 4933432K03RIK | 1427550_at | 1438356_x_at | 0.8004 |
| PEG10 | A1746468      | 1427550_at | 1439960_at   | 0.8223 |
| PEG10 | KIF20B        | 1427550_at | 1440924_at   | 0.8539 |
| PEG10 | A430071A18RIK | 1427550_at | 1441113_at   | 0.8886 |
| PEG10 | MATR3         | 1427550_at | 1441272_at   | 0.9056 |
| PEG10 | KBTBD8        | 1427550_at | 1441275_at   | 0.8306 |
| PEG10 | CCDC38        | 1427550_at | 1441965_at   | 0.8955 |
| PEG10 | TAF1D         | 1427550_at | 1442289_at   | 0.9274 |
| PEG10 | AW545941      | 1427550_at | 1443007_at   | 0.8011 |
| PEG10 | BM202761      | 1427550_at | 1443800_at   | 0.9423 |
| PEG10 | AV228095      | 1427550_at | 1444443_at   | 0.8197 |
| PEG10 | C530044C16RIK | 1427550_at | 1445247_at   | 0.8541 |
| PEG10 | 9330118A15RIK | 1427550_at | 1446612_at   | 0.8704 |
| PEG10 | BE953578      | 1427550_at | 1447298_at   | 0.8489 |
| PEG10 | OGG1          | 1427550_at | 1448815_at   | 0.8558 |
| PEG10 | MED1          | 1427550_at | 1450402_at   | 0.9389 |
| PEG10 | MYBL1         | 1427550_at | 1450481_at   | 0.8965 |
| PEG10 | HMGA2         | 1427550_at | 1450780_s_at | 0.8991 |
| PEG10 | HMGA2         | 1427550_at | 1450781_at   | 0.9561 |
| PEG10 | ZNF451        | 1427550_at | 1451816_at   | 0.9356 |
| PEG10 | LMNB2         | 1427550_at | 1451849_a_at | 0.8036 |
| PEG10 | ZBED3         | 1427550_at | 1452088_at   | 0.9659 |
| PEG10 | MLF1IP        | 1427550_at | 1452816_at   | 0.8978 |
| PEG10 | TTF2          | 1427550_at | 1452818_at   | 0.8308 |
| PEG10 | TMEM138       | 1427550_at | 1452978_at   | 0.8264 |
| PEG10 | HELLS         | 1427550_at | 1453361_at   | 0.8928 |
| PEG10 | TROAP         | 1427550_at | 1453370_at   | 0.8267 |
| PEG10 | CEP55         | 1427550_at | 1453683_a_at | 0.8280 |
| PEG10 | PHF6          | 1427550_at | 1453761_at   | 0.8065 |
| PEG10 | CCDC77        | 1427550_at | 1454228_a_at | 0.8530 |
| PEG10 | UTP23         | 1427550_at | 1455259_a_at | 0.8147 |
| PEG10 | 2700049P18RIK | 1427550_at | 1456163_at   | 0.8119 |
| PEG10 | DTL           | 1427550_at | 1456652_at   | 0.8296 |

|         |          |              |              |        |
|---------|----------|--------------|--------------|--------|
| PEG10   | RTEL1    | 1427550_at   | 1456729_x_at | 0.8055 |
| PEG10   | AV254764 | 1427550_at   | 1456951_at   | 0.8370 |
| PEG10   | ETAA1    | 1427550_at   | 1457882_at   | 0.9781 |
| PEG10   | MTR      | 1427550_at   | 1458532_at   | 0.8218 |
| PEG10   | BB463474 | 1427550_at   | 1458902_at   | 0.9303 |
| PEG10   | AA763515 | 1427550_at   | 1460065_at   | 0.9570 |
| ZNF157  | DEP1     | 1428887_at   | 1427602_at   | 0.8163 |
| TLE4    | DEP1     | 1430384_at   | 1427602_at   | 0.8074 |
| CAND1   | FANCI    | 1428649_at   | 1427953_at   | 0.9338 |
| ZNF157  | FANCI    | 1428887_at   | 1427953_at   | 0.8610 |
| MCM8    | FANCI    | 1429557_at   | 1427953_at   | 0.8847 |
| HELLS   | FANCI    | 1430139_at   | 1427953_at   | 0.9407 |
| TGIF2   | FANCI    | 1431115_at   | 1427953_at   | 0.9171 |
| ERCC4   | FANCI    | 1432272_a_at | 1427953_at   | 0.9293 |
| SUV39H2 | FANCI    | 1433996_at   | 1427953_at   | 0.9368 |
| SOX3    | FANCI    | 1435192_at   | 1427953_at   | 0.8104 |
| PIF1    | FANCI    | 1436738_at   | 1427953_at   | 0.9325 |
| SOX11   | FANCI    | 1436790_a_at | 1427953_at   | 0.8668 |
| ASCL1   | FANCI    | 1437086_at   | 1427953_at   | 0.8778 |
| RAD51C  | FANCI    | 1438453_at   | 1427953_at   | 0.9222 |
| NKRF    | FANCI    | 1441325_at   | 1427953_at   | 0.9605 |
| TAF1D   | FANCI    | 1442289_at   | 1427953_at   | 0.9031 |
| FOXM1   | FANCI    | 1448834_at   | 1427953_at   | 0.9424 |
| SOX4    | FANCI    | 1449370_at   | 1427953_at   | 0.8070 |
| SUPT16H | FANCI    | 1449578_at   | 1427953_at   | 0.9147 |
| TCERG1  | FANCI    | 1450100_a_at | 1427953_at   | 0.9602 |
| ASCL1   | FANCI    | 1450164_at   | 1427953_at   | 0.9435 |
| NPAS3   | FANCI    | 1450287_at   | 1427953_at   | 0.8428 |
| ZFP354C | FANCI    | 1450321_at   | 1427953_at   | 0.8533 |
| MED1    | FANCI    | 1450402_at   | 1427953_at   | 0.8490 |
| MYBL1   | FANCI    | 1450481_at   | 1427953_at   | 0.9529 |
| SOX3    | FANCI    | 1450485_at   | 1427953_at   | 0.9255 |
| SALL1   | FANCI    | 1450489_at   | 1427953_at   | 0.8236 |
| HMGA2   | FANCI    | 1450780_s_at | 1427953_at   | 0.9507 |
| HMGA2   | FANCI    | 1450781_at   | 1427953_at   | 0.8485 |
| ZNF451  | FANCI    | 1451816_at   | 1427953_at   | 0.9313 |
| NCOR2   | FANCI    | 1451841_a_at | 1427953_at   | 0.8912 |
| ZFP2    | FANCI    | 1452025_a_at | 1427953_at   | 0.8926 |
| ZBED3   | FANCI    | 1452088_at   | 1427953_at   | 0.8962 |
| CENPF   | FANCI    | 1452334_at   | 1427953_at   | 0.8904 |
| MLF1IP  | FANCI    | 1452816_at   | 1427953_at   | 0.9274 |
| TTF2    | FANCI    | 1452818_at   | 1427953_at   | 0.9576 |
| HELLS   | FANCI    | 1453361_at   | 1427953_at   | 0.8817 |
| PHF6    | FANCI    | 1453761_at   | 1427953_at   | 0.9744 |
| TAF2    | FANCI    | 1457351_at   | 1427953_at   | 0.9678 |
| ZNF69   | FANCI    | 1458274_at   | 1427953_at   | 0.8865 |
| CAND1   | SRGAP2   | 1428649_at   | 1427967_at   | 0.9422 |
| ZNF157  | SRGAP2   | 1428887_at   | 1427967_at   | 0.9737 |
| MCM8    | SRGAP2   | 1429557_at   | 1427967_at   | 0.8614 |
| HELLS   | SRGAP2   | 1430139_at   | 1427967_at   | 0.8819 |
| TLE4    | SRGAP2   | 1430384_at   | 1427967_at   | 0.8666 |



|         |               |              |              |        |
|---------|---------------|--------------|--------------|--------|
| TGIF2   | SRGAP2        | 1431115_at   | 1427967_at   | 0.8938 |
| ERCC4   | SRGAP2        | 1432272_a_at | 1427967_at   | 0.9957 |
| SUV39H2 | SRGAP2        | 1433996_at   | 1427967_at   | 0.8935 |
| PIF1    | SRGAP2        | 1436738_at   | 1427967_at   | 0.8330 |
| SOX11   | SRGAP2        | 1436790_a_at | 1427967_at   | 0.9003 |
| ASCL1   | SRGAP2        | 1437086_at   | 1427967_at   | 0.8601 |
| RAD51C  | SRGAP2        | 1438453_at   | 1427967_at   | 0.8770 |
| NKRF    | SRGAP2        | 1441325_at   | 1427967_at   | 0.9714 |
| FOXM1   | SRGAP2        | 1448834_at   | 1427967_at   | 0.9463 |
| SOX4    | SRGAP2        | 1449370_at   | 1427967_at   | 0.8617 |
| SUPT16H | SRGAP2        | 1449578_at   | 1427967_at   | 0.9204 |
| TCERG1  | SRGAP2        | 1450100_a_at | 1427967_at   | 0.9653 |
| ASCL1   | SRGAP2        | 1450164_at   | 1427967_at   | 0.9643 |
| ZFP354C | SRGAP2        | 1450321_at   | 1427967_at   | 0.9770 |
| MYBL1   | SRGAP2        | 1450481_at   | 1427967_at   | 0.8781 |
| SOX3    | SRGAP2        | 1450485_at   | 1427967_at   | 0.9666 |
| SALL1   | SRGAP2        | 1450489_at   | 1427967_at   | 0.8017 |
| HMG2A   | SRGAP2        | 1450780_s_at | 1427967_at   | 0.8550 |
| ZNF451  | SRGAP2        | 1451816_at   | 1427967_at   | 0.8514 |
| NCOR2   | SRGAP2        | 1451841_a_at | 1427967_at   | 0.9771 |
| ZFP2    | SRGAP2        | 1452025_a_at | 1427967_at   | 0.9476 |
| ZBED3   | SRGAP2        | 1452088_at   | 1427967_at   | 0.8103 |
| CENPF   | SRGAP2        | 1452334_at   | 1427967_at   | 0.9361 |
| MLF1IP  | SRGAP2        | 1452816_at   | 1427967_at   | 0.8293 |
| TTF2    | SRGAP2        | 1452818_at   | 1427967_at   | 0.9178 |
| PHF6    | SRGAP2        | 1453761_at   | 1427967_at   | 0.9516 |
| TAF2    | SRGAP2        | 1457351_at   | 1427967_at   | 0.9646 |
| ZNF69   | SRGAP2        | 1458274_at   | 1427967_at   | 0.8785 |
| CAND1   | ZNF157        | 1428649_at   | 1428887_at   | 0.9025 |
| CAND1   | RASL11A       | 1428649_at   | 1429444_at   | 0.8495 |
| CAND1   | MCM8          | 1428649_at   | 1429557_at   | 0.8822 |
| CAND1   | SMC2          | 1428649_at   | 1429659_at   | 0.9105 |
| CAND1   | 6230416J20RIK | 1428649_at   | 1429665_at   | 0.8824 |
| CAND1   | 4632434I11RIK | 1428649_at   | 1429734_at   | 0.9392 |
| CAND1   | HELLS         | 1428649_at   | 1430139_at   | 0.8911 |
| CAND1   | CEP70         | 1428649_at   | 1430231_a_at | 0.9581 |
| CAND1   | NUP205        | 1428649_at   | 1430343_at   | 0.8853 |
| CAND1   | NCAPD3        | 1428649_at   | 1430782_at   | 0.8798 |
| CAND1   | TGIF2         | 1428649_at   | 1431115_at   | 0.8941 |
| CAND1   | PGAP1         | 1428649_at   | 1431169_at   | 0.9127 |
| CAND1   | DLG5          | 1428649_at   | 1431187_s_at | 0.8894 |
| CAND1   | PVT1          | 1428649_at   | 1431352_s_at | 0.8909 |
| CAND1   | JAM2          | 1428649_at   | 1431416_a_at | 0.8079 |
| CAND1   | 4933432K03RIK | 1428649_at   | 1431489_at   | 0.9180 |
| CAND1   | 2610021K21RIK | 1428649_at   | 1431667_s_at | 0.8955 |
| CAND1   | RAB31         | 1428649_at   | 1431691_a_at | 0.8746 |
| CAND1   | PIGN          | 1428649_at   | 1432115_a_at | 0.9473 |
| CAND1   | ERCC4         | 1428649_at   | 1432272_a_at | 0.9477 |
| CAND1   | MIPOL1        | 1428649_at   | 1432284_at   | 0.8045 |
| CAND1   | ARMC9         | 1428649_at   | 1432383_a_at | 0.9398 |
| CAND1   | 1700106N22RIK | 1428649_at   | 1432504_at   | 0.9625 |

|       |               |            |              |        |
|-------|---------------|------------|--------------|--------|
| CAND1 | SUV39H2       | 1428649_at | 1433996_at   | 0.8966 |
| CAND1 | NPHP4         | 1428649_at | 1434024_at   | 0.9214 |
| CAND1 | SRGAP2        | 1428649_at | 1434407_at   | 0.9032 |
| CAND1 | EXOD1         | 1428649_at | 1435390_at   | 0.8149 |
| CAND1 | CD109         | 1428649_at | 1436346_at   | 0.9717 |
| CAND1 | CEP78         | 1428649_at | 1436352_at   | 0.8341 |
| CAND1 | ZBTB12        | 1428649_at | 1436382_at   | 0.9285 |
| CAND1 | SDC3          | 1428649_at | 1436482_a_at | 0.8236 |
| CAND1 | PPP1R14B      | 1428649_at | 1436716_at   | 0.8177 |
| CAND1 | PIF1          | 1428649_at | 1436738_at   | 0.8972 |
| CAND1 | SOX11         | 1428649_at | 1436790_a_at | 0.8773 |
| CAND1 | 4922501L14RIK | 1428649_at | 1436969_at   | 0.8471 |
| CAND1 | ASCL1         | 1428649_at | 1437086_at   | 0.8153 |
| CAND1 | 2810408I11RIK | 1428649_at | 1437549_at   | 0.9501 |
| CAND1 | AV164956      | 1428649_at | 1437673_at   | 0.9213 |
| CAND1 | HEATR5B       | 1428649_at | 1438085_at   | 0.8566 |
| CAND1 | 4933432K03RIK | 1428649_at | 1438356_x_at | 0.9453 |
| CAND1 | RAD51C        | 1428649_at | 1438453_at   | 0.9050 |
| CAND1 | DHX33         | 1428649_at | 1438765_at   | 0.9626 |
| CAND1 | AHI1          | 1428649_at | 1439083_at   | 0.9274 |
| CAND1 | FANCD2        | 1428649_at | 1439091_at   | 0.9124 |
| CAND1 | AI506816      | 1428649_at | 1439483_at   | 0.9466 |
| CAND1 | AI746468      | 1428649_at | 1439960_at   | 0.9309 |
| CAND1 | ABCC12        | 1428649_at | 1439985_at   | 0.8513 |
| CAND1 | A930024E05RIK | 1428649_at | 1440206_at   | 0.9261 |
| CAND1 | WDR35         | 1428649_at | 1440318_at   | 0.8295 |
| CAND1 | KIF20B        | 1428649_at | 1440924_at   | 0.8823 |
| CAND1 | A430071A18RIK | 1428649_at | 1441113_at   | 0.9015 |
| CAND1 | MATR3         | 1428649_at | 1441272_at   | 0.9015 |
| CAND1 | KBTBD8        | 1428649_at | 1441275_at   | 0.9554 |
| CAND1 | NKRF          | 1428649_at | 1441325_at   | 0.9478 |
| CAND1 | AU043080      | 1428649_at | 1441375_at   | 0.8832 |
| CAND1 | ASPM          | 1428649_at | 1441520_at   | 0.8330 |
| CAND1 | D2ERTD750E    | 1428649_at | 1442280_at   | 0.8315 |
| CAND1 | TAF1D         | 1428649_at | 1442289_at   | 0.8794 |
| CAND1 | TTK           | 1428649_at | 1442594_at   | 0.9627 |
| CAND1 | AW545941      | 1428649_at | 1443007_at   | 0.8241 |
| CAND1 | BB337104      | 1428649_at | 1443026_at   | 0.8450 |
| CAND1 | BB444561      | 1428649_at | 1443171_at   | 0.9323 |
| CAND1 | BB130444      | 1428649_at | 1443410_at   | 0.8169 |
| CAND1 | BM202761      | 1428649_at | 1443800_at   | 0.8516 |
| CAND1 | ZBTB39        | 1428649_at | 1443880_at   | 0.9338 |
| CAND1 | CDK5RAP2      | 1428649_at | 1443976_at   | 0.8411 |
| CAND1 | ERCC6L        | 1428649_at | 1444024_at   | 0.9612 |
| CAND1 | AV228095      | 1428649_at | 1444443_at   | 0.9372 |
| CAND1 | 6530418L21RIK | 1428649_at | 1444723_at   | 0.9260 |
| CAND1 | MASTL         | 1428649_at | 1444725_at   | 0.8534 |
| CAND1 | BC023969      | 1428649_at | 1445226_at   | 0.9610 |
| CAND1 | C530044C16RIK | 1428649_at | 1445247_at   | 0.8687 |
| CAND1 | AV323315      | 1428649_at | 1445298_at   | 0.8679 |
| CAND1 | 9330118A15RIK | 1428649_at | 1446612_at   | 0.8286 |

|       |               |            |              |        |
|-------|---------------|------------|--------------|--------|
| CAND1 | KCND3         | 1428649_at | 1447513_at   | 0.9711 |
| CAND1 | SEMA6D        | 1428649_at | 1448060_at   | 0.8787 |
| CAND1 | OGG1          | 1428649_at | 1448815_at   | 0.9115 |
| CAND1 | FOXM1         | 1428649_at | 1448834_at   | 0.9006 |
| CAND1 | SKP2          | 1428649_at | 1449293_a_at | 0.9660 |
| CAND1 | SOX4          | 1428649_at | 1449370_at   | 0.8343 |
| CAND1 | SUPT16H       | 1428649_at | 1449578_at   | 0.9445 |
| CAND1 | CCNB1         | 1428649_at | 1449675_at   | 0.9435 |
| CAND1 | LFNG          | 1428649_at | 1449943_at   | 0.8741 |
| CAND1 | APC           | 1428649_at | 1450056_at   | 0.8239 |
| CAND1 | 4933411K20RIK | 1428649_at | 1450076_at   | 0.9609 |
| CAND1 | TCERG1        | 1428649_at | 1450100_a_at | 0.9508 |
| CAND1 | ASCL1         | 1428649_at | 1450164_at   | 0.9337 |
| CAND1 | PCDHB11       | 1428649_at | 1450270_at   | 0.8109 |
| CAND1 | ZFP354C       | 1428649_at | 1450321_at   | 0.8678 |
| CAND1 | SHC3          | 1428649_at | 1450326_at   | 0.8448 |
| CAND1 | MYBL1         | 1428649_at | 1450481_at   | 0.9168 |
| CAND1 | SOX3          | 1428649_at | 1450485_at   | 0.9470 |
| CAND1 | SALL1         | 1428649_at | 1450489_at   | 0.8132 |
| CAND1 | HMGA2         | 1428649_at | 1450780_s_at | 0.9022 |
| CAND1 | HMGA2         | 1428649_at | 1450781_at   | 0.8428 |
| CAND1 | ZNF451        | 1428649_at | 1451816_at   | 0.9138 |
| CAND1 | NCOR2         | 1428649_at | 1451841_a_at | 0.9453 |
| CAND1 | LMNB2         | 1428649_at | 1451849_a_at | 0.9089 |
| CAND1 | ZFP2          | 1428649_at | 1452025_a_at | 0.9192 |
| CAND1 | 6720460F02RIK | 1428649_at | 1452073_at   | 0.8968 |
| CAND1 | ZBED3         | 1428649_at | 1452088_at   | 0.8666 |
| CAND1 | RRP1B         | 1428649_at | 1452119_at   | 0.8906 |
| CAND1 | NOVA1         | 1428649_at | 1452245_at   | 0.8509 |
| CAND1 | PVT1          | 1428649_at | 1452324_at   | 0.8376 |
| CAND1 | CENPF         | 1428649_at | 1452334_at   | 0.8727 |
| CAND1 | ASPM          | 1428649_at | 1452459_at   | 0.9203 |
| CAND1 | MLF1IP        | 1428649_at | 1452816_at   | 0.8811 |
| CAND1 | TTF2          | 1428649_at | 1452818_at   | 0.9180 |
| CAND1 | TMEM138       | 1428649_at | 1452978_at   | 0.8754 |
| CAND1 | RHOBTB3       | 1428649_at | 1453227_at   | 0.9635 |
| CAND1 | CALR3         | 1428649_at | 1453232_at   | 0.8385 |
| CAND1 | HELLS         | 1428649_at | 1453361_at   | 0.8555 |
| CAND1 | TROAP         | 1428649_at | 1453370_at   | 0.9544 |
| CAND1 | CEP55         | 1428649_at | 1453683_a_at | 0.9698 |
| CAND1 | DHX38         | 1428649_at | 1453751_at   | 0.8947 |
| CAND1 | PHF6          | 1428649_at | 1453761_at   | 0.9726 |
| CAND1 | FAM110A       | 1428649_at | 1453768_a_at | 0.8435 |
| CAND1 | NETO2         | 1428649_at | 1454032_at   | 0.8872 |
| CAND1 | CCDC77        | 1428649_at | 1454228_a_at | 0.9442 |
| CAND1 | EXOD1         | 1428649_at | 1454229_a_at | 0.9625 |
| CAND1 | UTP23         | 1428649_at | 1455259_a_at | 0.9311 |
| CAND1 | IER5L         | 1428649_at | 1455881_at   | 0.8042 |
| CAND1 | ATP5G2        | 1428649_at | 1456128_at   | 0.8004 |
| CAND1 | 2700049P18RIK | 1428649_at | 1456163_at   | 0.9352 |
| CAND1 | RTEL1         | 1428649_at | 1456729_x_at | 0.8059 |

|        |                       |            |                       |        |
|--------|-----------------------|------------|-----------------------|--------|
| CAND1  | BB053540              | 1428649_at | 1456840_at            | 0.8030 |
| CAND1  | AV254764              | 1428649_at | 1456951_at            | 0.8778 |
| CAND1  | TAF2                  | 1428649_at | 1457351_at            | 0.9427 |
| CAND1  | ZNF69                 | 1428649_at | 1458274_at            | 0.8464 |
| CAND1  | MTR                   | 1428649_at | 1458532_at            | 0.8563 |
| CAND1  | RNF219                | 1428649_at | 1458636_at            | 0.9718 |
| CAND1  | BB463474              | 1428649_at | 1458902_at            | 0.8420 |
| CAND1  | 6530418L21RIK         | 1428649_at | 1459051_at            | 0.8569 |
| CAND1  | AFFX-DapX-5_at        | 1428649_at | AFFX-DapX-5_at        | 0.8543 |
| CAND1  | AFFX-LysX-5_at        | 1428649_at | AFFX-LysX-5_at        | 0.8052 |
| CAND1  | AFFX-r2-Bs-dap-5_at   | 1428649_at | AFFX-r2-Bs-dap-5_at   | 0.8429 |
| CAND1  | AFFX-r2-Bs-lys-5_at   | 1428649_at | AFFX-r2-Bs-lys-5_at   | 0.8321 |
| CAND1  | AFFX-r2-Bs-thr-5_s_at | 1428649_at | AFFX-r2-Bs-thr-5_s_at | 0.8301 |
| CAND1  | AFFX-ThrX-5_at        | 1428649_at | AFFX-ThrX-5_at        | 0.8331 |
| ZNF157 | RASL11A               | 1428887_at | 1429444_at            | 0.9142 |
| ZNF157 | SMC2                  | 1428887_at | 1429659_at            | 0.8568 |
| ZNF157 | 6230416J20RIK         | 1428887_at | 1429665_at            | 0.8951 |
| ZNF157 | 4632434I11RIK         | 1428887_at | 1429734_at            | 0.9477 |
| ZNF157 | HELLS                 | 1428887_at | 1430139_at            | 0.8273 |
| ZNF157 | CEP70                 | 1428887_at | 1430231_a_at          | 0.9206 |
| ZNF157 | NUP205                | 1428887_at | 1430343_at            | 0.8405 |
| ZNF157 | TLE4                  | 1428887_at | 1430384_at            | 0.8862 |
| ZNF157 | TGIF2                 | 1428887_at | 1431115_at            | 0.8314 |
| ZNF157 | PGAP1                 | 1428887_at | 1431169_at            | 0.8543 |
| ZNF157 | DLG5                  | 1428887_at | 1431187_s_at          | 0.8951 |
| ZNF157 | PVT1                  | 1428887_at | 1431352_s_at          | 0.8855 |
| ZNF157 | JAM2                  | 1428887_at | 1431416_a_at          | 0.8458 |
| ZNF157 | 2610021K21RIK         | 1428887_at | 1431667_s_at          | 0.8026 |
| ZNF157 | RAB31                 | 1428887_at | 1431691_a_at          | 0.9253 |
| ZNF157 | PIGN                  | 1428887_at | 1432115_a_at          | 0.8650 |
| ZNF157 | ERCC4                 | 1428887_at | 1432272_a_at          | 0.9647 |
| ZNF157 | ARMC9                 | 1428887_at | 1432383_a_at          | 0.9690 |
| ZNF157 | 1700106N22RIK         | 1428887_at | 1432504_at            | 0.8261 |
| ZNF157 | SUV39H2               | 1428887_at | 1433996_at            | 0.8164 |
| ZNF157 | NPHP4                 | 1428887_at | 1434024_at            | 0.9225 |
| ZNF157 | SRGAP2                | 1428887_at | 1434407_at            | 0.8620 |
| ZNF157 | EXOD1                 | 1428887_at | 1435390_at            | 0.8183 |
| ZNF157 | CD109                 | 1428887_at | 1436346_at            | 0.8990 |
| ZNF157 | SDC3                  | 1428887_at | 1436482_a_at          | 0.8868 |
| ZNF157 | SOX11                 | 1428887_at | 1436790_a_at          | 0.8815 |
| ZNF157 | ASCL1                 | 1428887_at | 1437086_at            | 0.8515 |
| ZNF157 | LRRC4B                | 1428887_at | 1437183_at            | 0.8168 |
| ZNF157 | 2810408I11RIK         | 1428887_at | 1437549_at            | 0.8372 |
| ZNF157 | AV164956              | 1428887_at | 1437673_at            | 0.8663 |
| ZNF157 | HEATR5B               | 1428887_at | 1438085_at            | 0.9018 |
| ZNF157 | 4933432K03RIK         | 1428887_at | 1438356_x_at          | 0.8884 |
| ZNF157 | RAD51C                | 1428887_at | 1438453_at            | 0.8156 |
| ZNF157 | DHX33                 | 1428887_at | 1438765_at            | 0.8937 |
| ZNF157 | AHI1                  | 1428887_at | 1439083_at            | 0.8194 |
| ZNF157 | FANCD2                | 1428887_at | 1439091_at            | 0.8366 |
| ZNF157 | AI506816              | 1428887_at | 1439483_at            | 0.9744 |

|        |               |            |              |        |
|--------|---------------|------------|--------------|--------|
| ZNF157 | INTS10        | 1428887_at | 1439712_at   | 0.8165 |
| ZNF157 | AI746468      | 1428887_at | 1439960_at   | 0.8937 |
| ZNF157 | ABCC12        | 1428887_at | 1439985_at   | 0.8051 |
| ZNF157 | A930024E05RIK | 1428887_at | 1440206_at   | 0.9305 |
| ZNF157 | KBTBD8        | 1428887_at | 1441275_at   | 0.8512 |
| ZNF157 | NKRF          | 1428887_at | 1441325_at   | 0.9052 |
| ZNF157 | AU043080      | 1428887_at | 1441375_at   | 0.8520 |
| ZNF157 | ASPM          | 1428887_at | 1441520_at   | 0.9057 |
| ZNF157 | D2ERTD750E    | 1428887_at | 1442280_at   | 0.8357 |
| ZNF157 | NUP188        | 1428887_at | 1442314_at   | 0.8070 |
| ZNF157 | TTK           | 1428887_at | 1442594_at   | 0.9216 |
| ZNF157 | BB337104      | 1428887_at | 1443026_at   | 0.8555 |
| ZNF157 | BB444561      | 1428887_at | 1443171_at   | 0.8708 |
| ZNF157 | BB340127      | 1428887_at | 1443230_at   | 0.8386 |
| ZNF157 | BB130444      | 1428887_at | 1443410_at   | 0.9173 |
| ZNF157 | ZBTB39        | 1428887_at | 1443880_at   | 0.9129 |
| ZNF157 | CDK5RAP2      | 1428887_at | 1443976_at   | 0.8822 |
| ZNF157 | ERCC6L        | 1428887_at | 1444024_at   | 0.9236 |
| ZNF157 | AV228095      | 1428887_at | 1444443_at   | 0.8515 |
| ZNF157 | 6530418L21RIK | 1428887_at | 1444723_at   | 0.9705 |
| ZNF157 | BC023969      | 1428887_at | 1445226_at   | 0.9714 |
| ZNF157 | AV323315      | 1428887_at | 1445298_at   | 0.8517 |
| ZNF157 | KCND3         | 1428887_at | 1447513_at   | 0.9430 |
| ZNF157 | SEMA6D        | 1428887_at | 1448060_at   | 0.8756 |
| ZNF157 | OGG1          | 1428887_at | 1448815_at   | 0.8455 |
| ZNF157 | FOXM1         | 1428887_at | 1448834_at   | 0.9035 |
| ZNF157 | SKP2          | 1428887_at | 1449293_a_at | 0.9142 |
| ZNF157 | SOX4          | 1428887_at | 1449370_at   | 0.8557 |
| ZNF157 | SUPT16H       | 1428887_at | 1449578_at   | 0.8661 |
| ZNF157 | CCNB1         | 1428887_at | 1449675_at   | 0.8910 |
| ZNF157 | LFNG          | 1428887_at | 1449943_at   | 0.9466 |
| ZNF157 | APC           | 1428887_at | 1450056_at   | 0.8174 |
| ZNF157 | 4933411K20RIK | 1428887_at | 1450076_at   | 0.8863 |
| ZNF157 | TCERG1        | 1428887_at | 1450100_a_at | 0.9000 |
| ZNF157 | ASCL1         | 1428887_at | 1450164_at   | 0.9464 |
| ZNF157 | PCDHB11       | 1428887_at | 1450270_at   | 0.8538 |
| ZNF157 | ZFP354C       | 1428887_at | 1450321_at   | 0.9723 |
| ZNF157 | SHC3          | 1428887_at | 1450326_at   | 0.8375 |
| ZNF157 | SOX3          | 1428887_at | 1450485_at   | 0.9239 |
| ZNF157 | NCOR2         | 1428887_at | 1451841_a_at | 0.9725 |
| ZNF157 | LMNB2         | 1428887_at | 1451849_a_at | 0.8117 |
| ZNF157 | ZFP2          | 1428887_at | 1452025_a_at | 0.9288 |
| ZNF157 | 6720460F02RIK | 1428887_at | 1452073_at   | 0.9039 |
| ZNF157 | RRP1B         | 1428887_at | 1452119_at   | 0.8299 |
| ZNF157 | NOVA1         | 1428887_at | 1452245_at   | 0.8865 |
| ZNF157 | CENPF         | 1428887_at | 1452334_at   | 0.9124 |
| ZNF157 | ADAMTS7       | 1428887_at | 1452339_at   | 0.8829 |
| ZNF157 | ASPM          | 1428887_at | 1452459_at   | 0.9132 |
| ZNF157 | TTF2          | 1428887_at | 1452818_at   | 0.8361 |
| ZNF157 | RHOBTB3       | 1428887_at | 1453227_at   | 0.9613 |
| ZNF157 | CALR3         | 1428887_at | 1453232_at   | 0.8901 |

|         |                       |              |                       |        |
|---------|-----------------------|--------------|-----------------------|--------|
| ZNF157  | TROAP                 | 1428887_at   | 1453370_at            | 0.8845 |
| ZNF157  | CEP55                 | 1428887_at   | 1453683_a_at          | 0.8795 |
| ZNF157  | DHX38                 | 1428887_at   | 1453751_at            | 0.9221 |
| ZNF157  | PHF6                  | 1428887_at   | 1453761_at            | 0.8925 |
| ZNF157  | FAM110A               | 1428887_at   | 1453768_a_at          | 0.8600 |
| ZNF157  | NETO2                 | 1428887_at   | 1454032_at            | 0.8478 |
| ZNF157  | CCDC77                | 1428887_at   | 1454228_a_at          | 0.8114 |
| ZNF157  | EXOD1                 | 1428887_at   | 1454229_a_at          | 0.9325 |
| ZNF157  | XKR5                  | 1428887_at   | 1455127_at            | 0.8539 |
| ZNF157  | UTP23                 | 1428887_at   | 1455259_a_at          | 0.8414 |
| ZNF157  | BM114403              | 1428887_at   | 1455624_at            | 0.8278 |
| ZNF157  | ATP5G2                | 1428887_at   | 1456128_at            | 0.8804 |
| ZNF157  | 2700049P18RIK         | 1428887_at   | 1456163_at            | 0.8438 |
| ZNF157  | BB053540              | 1428887_at   | 1456840_at            | 0.8354 |
| ZNF157  | TAF2                  | 1428887_at   | 1457351_at            | 0.8912 |
| ZNF157  | BM224051              | 1428887_at   | 1458630_at            | 0.8787 |
| ZNF157  | RNF219                | 1428887_at   | 1458636_at            | 0.9097 |
| ZNF157  | 6530418L21RIK         | 1428887_at   | 1459051_at            | 0.9343 |
| ZNF157  | AFFX-DapX-5_at        | 1428887_at   | AFFX-DapX-5_at        | 0.9066 |
| ZNF157  | AFFX-LysX-5_at        | 1428887_at   | AFFX-LysX-5_at        | 0.8459 |
| ZNF157  | AFFX-r2-Bs-dap-5_at   | 1428887_at   | AFFX-r2-Bs-dap-5_at   | 0.8990 |
| ZNF157  | AFFX-r2-Bs-lys-5_at   | 1428887_at   | AFFX-r2-Bs-lys-5_at   | 0.8710 |
| ZNF157  | AFFX-r2-Bs-thr-5_s_at | 1428887_at   | AFFX-r2-Bs-thr-5_s_at | 0.8988 |
| ZNF157  | AFFX-ThrX-5_at        | 1428887_at   | AFFX-ThrX-5_at        | 0.9092 |
| SOX3    | 2010317E24RIK         | 1435192_at   | 1429404_at            | 0.8685 |
| SOX3    | 2010317E24RIK         | 1435192_at   | 1429405_at            | 0.8369 |
| TLE4    | RASL11A               | 1430384_at   | 1429444_at            | 0.9136 |
| ERCC4   | RASL11A               | 1432272_a_at | 1429444_at            | 0.8937 |
| SOX11   | RASL11A               | 1436790_a_at | 1429444_at            | 0.8061 |
| NKRF    | RASL11A               | 1441325_at   | 1429444_at            | 0.8031 |
| FOXM1   | RASL11A               | 1448834_at   | 1429444_at            | 0.8454 |
| ASCL1   | RASL11A               | 1450164_at   | 1429444_at            | 0.8681 |
| NPAS3   | RASL11A               | 1450287_at   | 1429444_at            | 0.8101 |
| ZFP354C | RASL11A               | 1450321_at   | 1429444_at            | 0.8740 |
| SOX3    | RASL11A               | 1450485_at   | 1429444_at            | 0.8118 |
| NCOR2   | RASL11A               | 1451841_a_at | 1429444_at            | 0.9260 |
| ZFP2    | RASL11A               | 1452025_a_at | 1429444_at            | 0.8375 |
| CENPF   | RASL11A               | 1452334_at   | 1429444_at            | 0.8870 |
| PHF6    | RASL11A               | 1453761_at   | 1429444_at            | 0.8220 |
| MCM8    | SPDYA                 | 1429557_at   | 1429470_at            | 0.8458 |
| SUV39H2 | SPDYA                 | 1433996_at   | 1429470_at            | 0.8028 |
| PIF1    | SPDYA                 | 1436738_at   | 1429470_at            | 0.8492 |
| RAD51C  | SPDYA                 | 1438453_at   | 1429470_at            | 0.8269 |
| TAF1D   | SPDYA                 | 1442289_at   | 1429470_at            | 0.8663 |
| TCERG1  | SPDYA                 | 1450100_a_at | 1429470_at            | 0.8040 |
| MED1    | SPDYA                 | 1450402_at   | 1429470_at            | 0.8153 |
| MYBL1   | SPDYA                 | 1450481_at   | 1429470_at            | 0.8896 |
| HMGA2   | SPDYA                 | 1450780_s_at | 1429470_at            | 0.8713 |
| HMGA2   | SPDYA                 | 1450781_at   | 1429470_at            | 0.8213 |
| ZNF451  | SPDYA                 | 1451816_at   | 1429470_at            | 0.8619 |
| ZBED3   | SPDYA                 | 1452088_at   | 1429470_at            | 0.8361 |

|        |               |            |              |        |
|--------|---------------|------------|--------------|--------|
| MLF1IP | SPDYA         | 1452816_at | 1429470_at   | 0.8564 |
| PHF6   | SPDYA         | 1453761_at | 1429470_at   | 0.8461 |
| TAF2   | SPDYA         | 1457351_at | 1429470_at   | 0.8157 |
| MCM8   | SMC2          | 1429557_at | 1429659_at   | 0.9133 |
| MCM8   | 6230416J20RIK | 1429557_at | 1429665_at   | 0.8839 |
| MCM8   | 4632434I11RIK | 1429557_at | 1429734_at   | 0.8715 |
| MCM8   | HELLS         | 1429557_at | 1430139_at   | 0.8585 |
| MCM8   | CEP70         | 1429557_at | 1430231_a_at | 0.8928 |
| MCM8   | NUP205        | 1429557_at | 1430343_at   | 0.9095 |
| MCM8   | NCAPD3        | 1429557_at | 1430782_at   | 0.8604 |
| MCM8   | TGIF2         | 1429557_at | 1431115_at   | 0.8272 |
| MCM8   | PGAP1         | 1429557_at | 1431169_at   | 0.9140 |
| MCM8   | MATR3         | 1429557_at | 1431235_at   | 0.8017 |
| MCM8   | PVT1          | 1429557_at | 1431352_s_at | 0.8061 |
| MCM8   | 4933432K03RIK | 1429557_at | 1431489_at   | 0.8720 |
| MCM8   | PPIH          | 1429557_at | 1431505_at   | 0.8095 |
| MCM8   | 2610021K21RIK | 1429557_at | 1431667_s_at | 0.9061 |
| MCM8   | RAB31         | 1429557_at | 1431691_a_at | 0.8097 |
| MCM8   | PIGN          | 1429557_at | 1432115_a_at | 0.9283 |
| MCM8   | ERCC4         | 1429557_at | 1432272_a_at | 0.8703 |
| MCM8   | MIPOL1        | 1429557_at | 1432284_at   | 0.8528 |
| MCM8   | ARMC9         | 1429557_at | 1432383_a_at | 0.8467 |
| MCM8   | 1700106N22RIK | 1429557_at | 1432504_at   | 0.8720 |
| MCM8   | TROAP         | 1429557_at | 1433790_at   | 0.8172 |
| MCM8   | SUV39H2       | 1429557_at | 1433996_at   | 0.8874 |
| MCM8   | NPHP4         | 1429557_at | 1434024_at   | 0.8435 |
| MCM8   | SRGAP2        | 1429557_at | 1434407_at   | 0.8190 |
| MCM8   | EXOD1         | 1429557_at | 1435390_at   | 0.8374 |
| MCM8   | GEMIN5        | 1429557_at | 1436311_at   | 0.8529 |
| MCM8   | CD109         | 1429557_at | 1436346_at   | 0.9024 |
| MCM8   | CEP78         | 1429557_at | 1436352_at   | 0.8405 |
| MCM8   | ZBTB12        | 1429557_at | 1436382_at   | 0.9257 |
| MCM8   | PPP1R14B      | 1429557_at | 1436716_at   | 0.8456 |
| MCM8   | PIF1          | 1429557_at | 1436738_at   | 0.8925 |
| MCM8   | 2810408I11RIK | 1429557_at | 1437549_at   | 0.9405 |
| MCM8   | AV164956      | 1429557_at | 1437673_at   | 0.8346 |
| MCM8   | HEATR5B       | 1429557_at | 1438085_at   | 0.8078 |
| MCM8   | 4933432K03RIK | 1429557_at | 1438356_x_at | 0.9081 |
| MCM8   | RAD51C        | 1429557_at | 1438453_at   | 0.8751 |
| MCM8   | DHX33         | 1429557_at | 1438765_at   | 0.9121 |
| MCM8   | FANCD2        | 1429557_at | 1439091_at   | 0.8736 |
| MCM8   | A1506816      | 1429557_at | 1439483_at   | 0.8568 |
| MCM8   | A1746468      | 1429557_at | 1439960_at   | 0.9028 |
| MCM8   | ABCC12        | 1429557_at | 1439985_at   | 0.8130 |
| MCM8   | A930024E05RIK | 1429557_at | 1440206_at   | 0.8712 |
| MCM8   | KIF20B        | 1429557_at | 1440924_at   | 0.9105 |
| MCM8   | A430071A18RIK | 1429557_at | 1441113_at   | 0.8589 |
| MCM8   | MATR3         | 1429557_at | 1441272_at   | 0.9189 |
| MCM8   | KBTBD8        | 1429557_at | 1441275_at   | 0.9284 |
| MCM8   | NKRF          | 1429557_at | 1441325_at   | 0.9161 |
| MCM8   | AU043080      | 1429557_at | 1441375_at   | 0.8803 |

|      |               |            |              |        |
|------|---------------|------------|--------------|--------|
| MCM8 | TAF1D         | 1429557_at | 1442289_at   | 0.8894 |
| MCM8 | TTK           | 1429557_at | 1442594_at   | 0.9141 |
| MCM8 | AW545941      | 1429557_at | 1443007_at   | 0.8981 |
| MCM8 | BB444561      | 1429557_at | 1443171_at   | 0.9123 |
| MCM8 | BM202761      | 1429557_at | 1443800_at   | 0.8836 |
| MCM8 | ZBTB39        | 1429557_at | 1443880_at   | 0.8488 |
| MCM8 | CDK5RAP2      | 1429557_at | 1443976_at   | 0.8149 |
| MCM8 | ERCC6L        | 1429557_at | 1444024_at   | 0.9093 |
| MCM8 | AV228095      | 1429557_at | 1444443_at   | 0.9230 |
| MCM8 | MASTL         | 1429557_at | 1444725_at   | 0.8722 |
| MCM8 | BC023969      | 1429557_at | 1445226_at   | 0.8646 |
| MCM8 | C530044C16RIK | 1429557_at | 1445247_at   | 0.8318 |
| MCM8 | AV323315      | 1429557_at | 1445298_at   | 0.8412 |
| MCM8 | KCND3         | 1429557_at | 1447513_at   | 0.8888 |
| MCM8 | SEMA6D        | 1429557_at | 1448060_at   | 0.8140 |
| MCM8 | OGG1          | 1429557_at | 1448815_at   | 0.9102 |
| MCM8 | FOXM1         | 1429557_at | 1448834_at   | 0.8610 |
| MCM8 | SKP2          | 1429557_at | 1449293_a_at | 0.9226 |
| MCM8 | SUPT16H       | 1429557_at | 1449578_at   | 0.8747 |
| MCM8 | CCNB1         | 1429557_at | 1449675_at   | 0.9178 |
| MCM8 | 4933411K20RIK | 1429557_at | 1450076_at   | 0.9169 |
| MCM8 | TCERG1        | 1429557_at | 1450100_a_at | 0.9113 |
| MCM8 | ASCL1         | 1429557_at | 1450164_at   | 0.8405 |
| MCM8 | MED1          | 1429557_at | 1450402_at   | 0.8355 |
| MCM8 | MYBL1         | 1429557_at | 1450481_at   | 0.9307 |
| MCM8 | SOX3          | 1429557_at | 1450485_at   | 0.8876 |
| MCM8 | SALL1         | 1429557_at | 1450489_at   | 0.8644 |
| MCM8 | HMGA2         | 1429557_at | 1450780_s_at | 0.9046 |
| MCM8 | HMGA2         | 1429557_at | 1450781_at   | 0.8532 |
| MCM8 | ZNF451        | 1429557_at | 1451816_at   | 0.9127 |
| MCM8 | NCOR2         | 1429557_at | 1451841_a_at | 0.8227 |
| MCM8 | LMNB2         | 1429557_at | 1451849_a_at | 0.8796 |
| MCM8 | ZFP2          | 1429557_at | 1452025_a_at | 0.8522 |
| MCM8 | 6720460F02RIK | 1429557_at | 1452073_at   | 0.8456 |
| MCM8 | ZBED3         | 1429557_at | 1452088_at   | 0.8933 |
| MCM8 | RRP1B         | 1429557_at | 1452119_at   | 0.8258 |
| MCM8 | ASPM          | 1429557_at | 1452459_at   | 0.8644 |
| MCM8 | MLF1IP        | 1429557_at | 1452816_at   | 0.9129 |
| MCM8 | TTF2          | 1429557_at | 1452818_at   | 0.8916 |
| MCM8 | TMEM138       | 1429557_at | 1452978_at   | 0.8168 |
| MCM8 | RHOBTB3       | 1429557_at | 1453227_at   | 0.8877 |
| MCM8 | HELLS         | 1429557_at | 1453361_at   | 0.8191 |
| MCM8 | TROAP         | 1429557_at | 1453370_at   | 0.9220 |
| MCM8 | CEP55         | 1429557_at | 1453683_a_at | 0.9317 |
| MCM8 | DHX38         | 1429557_at | 1453751_at   | 0.8532 |
| MCM8 | PHF6          | 1429557_at | 1453761_at   | 0.9277 |
| MCM8 | CCDC77        | 1429557_at | 1454228_a_at | 0.9132 |
| MCM8 | EXOD1         | 1429557_at | 1454229_a_at | 0.9028 |
| MCM8 | UTP23         | 1429557_at | 1455259_a_at | 0.9184 |
| MCM8 | 2700049P18RIK | 1429557_at | 1456163_at   | 0.8631 |
| MCM8 | RTEL1         | 1429557_at | 1456729_x_at | 0.8668 |



|         |                     |              |                     |        |
|---------|---------------------|--------------|---------------------|--------|
| MCM8    | AV254764            | 1429557_at   | 1456951_at          | 0.8784 |
| MCM8    | TAF2                | 1429557_at   | 1457351_at          | 0.9208 |
| MCM8    | ZNF69               | 1429557_at   | 1458274_at          | 0.8091 |
| MCM8    | MTR                 | 1429557_at   | 1458532_at          | 0.8425 |
| MCM8    | RNF219              | 1429557_at   | 1458636_at          | 0.9283 |
| MCM8    | BB463474            | 1429557_at   | 1458902_at          | 0.8802 |
| MCM8    | AA763515            | 1429557_at   | 1460065_at          | 0.8304 |
| MCM8    | AFFX-DapX-5_at      | 1429557_at   | AFFX-DapX-5_at      | 0.8184 |
| MCM8    | AFFX-r2-Bs-dap-5_at | 1429557_at   | AFFX-r2-Bs-dap-5_at | 0.8202 |
| HELLS   | SMC2                | 1430139_at   | 1429659_at          | 0.9094 |
| TGIF2   | SMC2                | 1431115_at   | 1429659_at          | 0.8862 |
| ERCC4   | SMC2                | 1432272_a_at | 1429659_at          | 0.9407 |
| SUV39H2 | SMC2                | 1433996_at   | 1429659_at          | 0.9421 |
| PIF1    | SMC2                | 1436738_at   | 1429659_at          | 0.8855 |
| SOX11   | SMC2                | 1436790_a_at | 1429659_at          | 0.8646 |
| ASCL1   | SMC2                | 1437086_at   | 1429659_at          | 0.8254 |
| RAD51C  | SMC2                | 1438453_at   | 1429659_at          | 0.9162 |
| NKRF    | SMC2                | 1441325_at   | 1429659_at          | 0.9764 |
| TAF1D   | SMC2                | 1442289_at   | 1429659_at          | 0.8912 |
| FOXM1   | SMC2                | 1448834_at   | 1429659_at          | 0.9185 |
| SOX4    | SMC2                | 1449370_at   | 1429659_at          | 0.8020 |
| SUPT16H | SMC2                | 1449578_at   | 1429659_at          | 0.9250 |
| TCERG1  | SMC2                | 1450100_a_at | 1429659_at          | 0.9778 |
| ASCL1   | SMC2                | 1450164_at   | 1429659_at          | 0.9182 |
| ZFP354C | SMC2                | 1450321_at   | 1429659_at          | 0.8795 |
| MED1    | SMC2                | 1450402_at   | 1429659_at          | 0.8662 |
| MYBL1   | SMC2                | 1450481_at   | 1429659_at          | 0.9556 |
| SOX3    | SMC2                | 1450485_at   | 1429659_at          | 0.9234 |
| SALL1   | SMC2                | 1450489_at   | 1429659_at          | 0.8227 |
| HMGA2   | SMC2                | 1450780_s_at | 1429659_at          | 0.9201 |
| HMGA2   | SMC2                | 1450781_at   | 1429659_at          | 0.8121 |
| ZNF451  | SMC2                | 1451816_at   | 1429659_at          | 0.9189 |
| NCOR2   | SMC2                | 1451841_a_at | 1429659_at          | 0.8787 |
| ZFP2    | SMC2                | 1452025_a_at | 1429659_at          | 0.8950 |
| ZBED3   | SMC2                | 1452088_at   | 1429659_at          | 0.8815 |
| CENPF   | SMC2                | 1452334_at   | 1429659_at          | 0.9164 |
| MLF1IP  | SMC2                | 1452816_at   | 1429659_at          | 0.9328 |
| TTF2    | SMC2                | 1452818_at   | 1429659_at          | 0.9478 |
| HELLS   | SMC2                | 1453361_at   | 1429659_at          | 0.8466 |
| PHF6    | SMC2                | 1453761_at   | 1429659_at          | 0.9650 |
| TAF2    | SMC2                | 1457351_at   | 1429659_at          | 0.9857 |
| ZNF69   | SMC2                | 1458274_at   | 1429659_at          | 0.9192 |
| HELLS   | 6230416J20RIK       | 1430139_at   | 1429665_at          | 0.8777 |
| TGIF2   | 6230416J20RIK       | 1431115_at   | 1429665_at          | 0.8837 |
| ERCC4   | 6230416J20RIK       | 1432272_a_at | 1429665_at          | 0.9265 |
| SUV39H2 | 6230416J20RIK       | 1433996_at   | 1429665_at          | 0.8566 |
| PIF1    | 6230416J20RIK       | 1436738_at   | 1429665_at          | 0.8198 |
| SOX11   | 6230416J20RIK       | 1436790_a_at | 1429665_at          | 0.8583 |
| ASCL1   | 6230416J20RIK       | 1437086_at   | 1429665_at          | 0.8262 |
| RAD51C  | 6230416J20RIK       | 1438453_at   | 1429665_at          | 0.8464 |
| NKRF    | 6230416J20RIK       | 1441325_at   | 1429665_at          | 0.9115 |

|         |               |              |              |        |
|---------|---------------|--------------|--------------|--------|
| FOXM1   | 6230416J20RIK | 1448834_at   | 1429665_at   | 0.9377 |
| SOX4    | 6230416J20RIK | 1449370_at   | 1429665_at   | 0.8240 |
| SUPT16H | 6230416J20RIK | 1449578_at   | 1429665_at   | 0.8947 |
| TCERG1  | 6230416J20RIK | 1450100_a_at | 1429665_at   | 0.9163 |
| ASCL1   | 6230416J20RIK | 1450164_at   | 1429665_at   | 0.9103 |
| ZFP354C | 6230416J20RIK | 1450321_at   | 1429665_at   | 0.8889 |
| MYBL1   | 6230416J20RIK | 1450481_at   | 1429665_at   | 0.8474 |
| SOX3    | 6230416J20RIK | 1450485_at   | 1429665_at   | 0.8955 |
| SALL1   | 6230416J20RIK | 1450489_at   | 1429665_at   | 0.8469 |
| HMGA2   | 6230416J20RIK | 1450780_s_at | 1429665_at   | 0.8315 |
| ZNF451  | 6230416J20RIK | 1451816_at   | 1429665_at   | 0.8197 |
| NCOR2   | 6230416J20RIK | 1451841_a_at | 1429665_at   | 0.9111 |
| ZFP2    | 6230416J20RIK | 1452025_a_at | 1429665_at   | 0.9358 |
| CENPF   | 6230416J20RIK | 1452334_at   | 1429665_at   | 0.8859 |
| MLF1IP  | 6230416J20RIK | 1452816_at   | 1429665_at   | 0.8169 |
| TTF2    | 6230416J20RIK | 1452818_at   | 1429665_at   | 0.8778 |
| PHF6    | 6230416J20RIK | 1453761_at   | 1429665_at   | 0.9101 |
| TAF2    | 6230416J20RIK | 1457351_at   | 1429665_at   | 0.9175 |
| ZNF69   | 6230416J20RIK | 1458274_at   | 1429665_at   | 0.8207 |
| HELLS   | 4632434I11RIK | 1430139_at   | 1429734_at   | 0.9174 |
| TLE4    | 4632434I11RIK | 1430384_at   | 1429734_at   | 0.8607 |
| TGIF2   | 4632434I11RIK | 1431115_at   | 1429734_at   | 0.8834 |
| ERCC4   | 4632434I11RIK | 1432272_a_at | 1429734_at   | 0.9796 |
| SUV39H2 | 4632434I11RIK | 1433996_at   | 1429734_at   | 0.9144 |
| PIF1    | 4632434I11RIK | 1436738_at   | 1429734_at   | 0.8326 |
| SOX11   | 4632434I11RIK | 1436790_a_at | 1429734_at   | 0.9353 |
| ASCL1   | 4632434I11RIK | 1437086_at   | 1429734_at   | 0.8614 |
| RAD51C  | 4632434I11RIK | 1438453_at   | 1429734_at   | 0.8892 |
| NKRF    | 4632434I11RIK | 1441325_at   | 1429734_at   | 0.9552 |
| FOXM1   | 4632434I11RIK | 1448834_at   | 1429734_at   | 0.9489 |
| SOX4    | 4632434I11RIK | 1449370_at   | 1429734_at   | 0.8662 |
| SUPT16H | 4632434I11RIK | 1449578_at   | 1429734_at   | 0.9296 |
| TCERG1  | 4632434I11RIK | 1450100_a_at | 1429734_at   | 0.9587 |
| ASCL1   | 4632434I11RIK | 1450164_at   | 1429734_at   | 0.9516 |
| NPAS3   | 4632434I11RIK | 1450287_at   | 1429734_at   | 0.8008 |
| ZFP354C | 4632434I11RIK | 1450321_at   | 1429734_at   | 0.9373 |
| MYBL1   | 4632434I11RIK | 1450481_at   | 1429734_at   | 0.8796 |
| SOX3    | 4632434I11RIK | 1450485_at   | 1429734_at   | 0.9349 |
| HMGA2   | 4632434I11RIK | 1450780_s_at | 1429734_at   | 0.8573 |
| ZNF451  | 4632434I11RIK | 1451816_at   | 1429734_at   | 0.8448 |
| NCOR2   | 4632434I11RIK | 1451841_a_at | 1429734_at   | 0.9555 |
| ZFP2    | 4632434I11RIK | 1452025_a_at | 1429734_at   | 0.9311 |
| CENPF   | 4632434I11RIK | 1452334_at   | 1429734_at   | 0.9448 |
| MLF1IP  | 4632434I11RIK | 1452816_at   | 1429734_at   | 0.8533 |
| TTF2    | 4632434I11RIK | 1452818_at   | 1429734_at   | 0.8962 |
| PHF6    | 4632434I11RIK | 1453761_at   | 1429734_at   | 0.9549 |
| TAF2    | 4632434I11RIK | 1457351_at   | 1429734_at   | 0.9558 |
| ZNF69   | 4632434I11RIK | 1458274_at   | 1429734_at   | 0.8704 |
| HELLS   | CEP70         | 1430139_at   | 1430231_a_at | 0.8937 |
| HELLS   | NUP205        | 1430139_at   | 1430343_at   | 0.8822 |
| HELLS   | NCAPD3        | 1430139_at   | 1430782_at   | 0.8590 |

|       |               |            |              |        |
|-------|---------------|------------|--------------|--------|
| HELLS | TGIF2         | 1430139_at | 1431115_at   | 0.8582 |
| HELLS | PGAP1         | 1430139_at | 1431169_at   | 0.8703 |
| HELLS | DLG5          | 1430139_at | 1431187_s_at | 0.8382 |
| HELLS | 4933432K03RIK | 1430139_at | 1431489_at   | 0.8383 |
| HELLS | 2610021K21RIK | 1430139_at | 1431667_s_at | 0.8866 |
| HELLS | PIGN          | 1430139_at | 1432115_a_at | 0.9169 |
| HELLS | ERCC4         | 1430139_at | 1432272_a_at | 0.8809 |
| HELLS | ARMC9         | 1430139_at | 1432383_a_at | 0.8637 |
| HELLS | 1700106N22RIK | 1430139_at | 1432504_at   | 0.8467 |
| HELLS | SUV39H2       | 1430139_at | 1433996_at   | 0.9402 |
| HELLS | NPHP4         | 1430139_at | 1434024_at   | 0.9062 |
| HELLS | SRGAP2        | 1430139_at | 1434407_at   | 0.8306 |
| HELLS | SOX3          | 1430139_at | 1435192_at   | 0.8307 |
| HELLS | EXOD1         | 1430139_at | 1435390_at   | 0.8645 |
| HELLS | CD109         | 1430139_at | 1436346_at   | 0.8984 |
| HELLS | CEP78         | 1430139_at | 1436352_at   | 0.9084 |
| HELLS | ZBTB12        | 1430139_at | 1436382_at   | 0.8959 |
| HELLS | SDC3          | 1430139_at | 1436482_a_at | 0.8292 |
| HELLS | PIF1          | 1430139_at | 1436738_at   | 0.9199 |
| HELLS | SOX11         | 1430139_at | 1436790_a_at | 0.9102 |
| HELLS | 4922501L14RIK | 1430139_at | 1436969_at   | 0.8451 |
| HELLS | ASCL1         | 1430139_at | 1437086_at   | 0.8814 |
| HELLS | 2810408I11RIK | 1430139_at | 1437549_at   | 0.9130 |
| HELLS | AV164956      | 1430139_at | 1437673_at   | 0.8600 |
| HELLS | HEATR1        | 1430139_at | 1437965_at   | 0.8702 |
| HELLS | HEATR5B       | 1430139_at | 1438085_at   | 0.8356 |
| HELLS | 4933432K03RIK | 1430139_at | 1438356_x_at | 0.9129 |
| HELLS | RAD51C        | 1430139_at | 1438453_at   | 0.9378 |
| HELLS | DHX33         | 1430139_at | 1438765_at   | 0.8973 |
| HELLS | AHI1          | 1430139_at | 1439083_at   | 0.8511 |
| HELLS | FANCD2        | 1430139_at | 1439091_at   | 0.9329 |
| HELLS | AI506816      | 1430139_at | 1439483_at   | 0.8797 |
| HELLS | AI746468      | 1430139_at | 1439960_at   | 0.9044 |
| HELLS | ABCC12        | 1430139_at | 1439985_at   | 0.8951 |
| HELLS | A930024E05RIK | 1430139_at | 1440206_at   | 0.8994 |
| HELLS | SPRY4         | 1430139_at | 1440867_at   | 0.8186 |
| HELLS | KIF20B        | 1430139_at | 1440924_at   | 0.8935 |
| HELLS | A430071A18RIK | 1430139_at | 1441113_at   | 0.8128 |
| HELLS | MATR3         | 1430139_at | 1441272_at   | 0.8930 |
| HELLS | KBTBD8        | 1430139_at | 1441275_at   | 0.9116 |
| HELLS | NKRF          | 1430139_at | 1441325_at   | 0.9136 |
| HELLS | AU043080      | 1430139_at | 1441375_at   | 0.8827 |
| HELLS | ASPM          | 1430139_at | 1441520_at   | 0.8204 |
| HELLS | D2ERTD750E    | 1430139_at | 1442280_at   | 0.9248 |
| HELLS | TAF1D         | 1430139_at | 1442289_at   | 0.8490 |
| HELLS | NUP188        | 1430139_at | 1442314_at   | 0.8201 |
| HELLS | TTK           | 1430139_at | 1442594_at   | 0.9179 |
| HELLS | AW545941      | 1430139_at | 1443007_at   | 0.8465 |
| HELLS | BB337104      | 1430139_at | 1443026_at   | 0.8673 |
| HELLS | BB444561      | 1430139_at | 1443171_at   | 0.9413 |
| HELLS | BB340127      | 1430139_at | 1443230_at   | 0.8120 |

|       |               |            |              |        |
|-------|---------------|------------|--------------|--------|
| HELLS | BB130444      | 1430139_at | 1443410_at   | 0.8114 |
| HELLS | BM202761      | 1430139_at | 1443800_at   | 0.8439 |
| HELLS | ZBTB39        | 1430139_at | 1443880_at   | 0.8397 |
| HELLS | ERCC6L        | 1430139_at | 1444024_at   | 0.9155 |
| HELLS | AV228095      | 1430139_at | 1444443_at   | 0.9428 |
| HELLS | 6530418L21RIK | 1430139_at | 1444723_at   | 0.8619 |
| HELLS | MASTL         | 1430139_at | 1444725_at   | 0.9291 |
| HELLS | BC023969      | 1430139_at | 1445226_at   | 0.8959 |
| HELLS | C530044C16RIK | 1430139_at | 1445247_at   | 0.8413 |
| HELLS | AV323315      | 1430139_at | 1445298_at   | 0.9596 |
| HELLS | KCND3         | 1430139_at | 1447513_at   | 0.9027 |
| HELLS | OGG1          | 1430139_at | 1448815_at   | 0.8892 |
| HELLS | FOXM1         | 1430139_at | 1448834_at   | 0.9246 |
| HELLS | SKP2          | 1430139_at | 1449293_a_at | 0.9182 |
| HELLS | SOX4          | 1430139_at | 1449370_at   | 0.8629 |
| HELLS | SUPT16H       | 1430139_at | 1449578_at   | 0.9197 |
| HELLS | CCNB1         | 1430139_at | 1449675_at   | 0.9132 |
| HELLS | 4933411K20RIK | 1430139_at | 1450076_at   | 0.9117 |
| HELLS | TCERG1        | 1430139_at | 1450100_a_at | 0.9165 |
| HELLS | ASCL1         | 1430139_at | 1450164_at   | 0.9220 |
| HELLS | ZFP354C       | 1430139_at | 1450321_at   | 0.8174 |
| HELLS | MYBL1         | 1430139_at | 1450481_at   | 0.8948 |
| HELLS | SOX3          | 1430139_at | 1450485_at   | 0.8869 |
| HELLS | HMGA2         | 1430139_at | 1450780_s_at | 0.9285 |
| HELLS | HMGA2         | 1430139_at | 1450781_at   | 0.8021 |
| HELLS | ZNF451        | 1430139_at | 1451816_at   | 0.8847 |
| HELLS | NCOR2         | 1430139_at | 1451841_a_at | 0.8435 |
| HELLS | LMNB2         | 1430139_at | 1451849_a_at | 0.8336 |
| HELLS | ZFP2          | 1430139_at | 1452025_a_at | 0.8515 |
| HELLS | 6720460F02RIK | 1430139_at | 1452073_at   | 0.9389 |
| HELLS | ZBED3         | 1430139_at | 1452088_at   | 0.8528 |
| HELLS | RRP1B         | 1430139_at | 1452119_at   | 0.8541 |
| HELLS | NOVA1         | 1430139_at | 1452245_at   | 0.8565 |
| HELLS | CENPF         | 1430139_at | 1452334_at   | 0.8297 |
| HELLS | 4930427A07RIK | 1430139_at | 1452337_at   | 0.8470 |
| HELLS | ADAMTS7       | 1430139_at | 1452339_at   | 0.8108 |
| HELLS | ASPM          | 1430139_at | 1452459_at   | 0.9173 |
| HELLS | MLF1IP        | 1430139_at | 1452816_at   | 0.8945 |
| HELLS | TTF2          | 1430139_at | 1452818_at   | 0.8868 |
| HELLS | TMEM138       | 1430139_at | 1452978_at   | 0.8297 |
| HELLS | RHOBTB3       | 1430139_at | 1453227_at   | 0.8960 |
| HELLS | TROAP         | 1430139_at | 1453370_at   | 0.9171 |
| HELLS | CEP55         | 1430139_at | 1453683_a_at | 0.9194 |
| HELLS | DHX38         | 1430139_at | 1453751_at   | 0.8810 |
| HELLS | PHF6          | 1430139_at | 1453761_at   | 0.9184 |
| HELLS | FAM110A       | 1430139_at | 1453768_a_at | 0.8218 |
| HELLS | NETO2         | 1430139_at | 1454032_at   | 0.9012 |
| HELLS | CCDC77        | 1430139_at | 1454228_a_at | 0.8959 |
| HELLS | EXOD1         | 1430139_at | 1454229_a_at | 0.9200 |
| HELLS | XKR5          | 1430139_at | 1455127_at   | 0.8015 |
| HELLS | UTP23         | 1430139_at | 1455259_a_at | 0.9048 |

|         |                |              |                |        |
|---------|----------------|--------------|----------------|--------|
| HELLS   | IER5L          | 1430139_at   | 1455881_at     | 0.8114 |
| HELLS   | 2700049P18RIK  | 1430139_at   | 1456163_at     | 0.8632 |
| HELLS   | DTL            | 1430139_at   | 1456652_at     | 0.8212 |
| HELLS   | RTEL1          | 1430139_at   | 1456729_x_at   | 0.8826 |
| HELLS   | BB053540       | 1430139_at   | 1456840_at     | 0.8252 |
| HELLS   | AV254764       | 1430139_at   | 1456951_at     | 0.9279 |
| HELLS   | NETO2          | 1430139_at   | 1457344_at     | 0.8660 |
| HELLS   | TAF2           | 1430139_at   | 1457351_at     | 0.9137 |
| HELLS   | ADAMTS6        | 1430139_at   | 1457548_at     | 0.8367 |
| HELLS   | ZNF69          | 1430139_at   | 1458274_at     | 0.8230 |
| HELLS   | MTR            | 1430139_at   | 1458532_at     | 0.8481 |
| HELLS   | RNF219         | 1430139_at   | 1458636_at     | 0.9077 |
| HELLS   | BB463474       | 1430139_at   | 1458902_at     | 0.8893 |
| HELLS   | 6530418L21RIK  | 1430139_at   | 1459051_at     | 0.8020 |
| HELLS   | AFFX-DapX-5_at | 1430139_at   | AFFX-DapX-5_at | 0.8064 |
| TLE4    | CEP70          | 1430384_at   | 1430231_a_at   | 0.8033 |
| TGIF2   | CEP70          | 1431115_at   | 1430231_a_at   | 0.8890 |
| ERCC4   | CEP70          | 1432272_a_at | 1430231_a_at   | 0.9656 |
| SUV39H2 | CEP70          | 1433996_at   | 1430231_a_at   | 0.8964 |
| PIF1    | CEP70          | 1436738_at   | 1430231_a_at   | 0.8798 |
| SOX11   | CEP70          | 1436790_a_at | 1430231_a_at   | 0.8771 |
| ASCL1   | CEP70          | 1437086_at   | 1430231_a_at   | 0.8437 |
| RAD51C  | CEP70          | 1438453_at   | 1430231_a_at   | 0.9122 |
| NKRF    | CEP70          | 1441325_at   | 1430231_a_at   | 0.9485 |
| TAF1D   | CEP70          | 1442289_at   | 1430231_a_at   | 0.8734 |
| FOXM1   | CEP70          | 1448834_at   | 1430231_a_at   | 0.9216 |
| SOX4    | CEP70          | 1449370_at   | 1430231_a_at   | 0.8414 |
| SUPT16H | CEP70          | 1449578_at   | 1430231_a_at   | 0.9347 |
| TCERG1  | CEP70          | 1450100_a_at | 1430231_a_at   | 0.9751 |
| ASCL1   | CEP70          | 1450164_at   | 1430231_a_at   | 0.9444 |
| ZFP354C | CEP70          | 1450321_at   | 1430231_a_at   | 0.8989 |
| MYBL1   | CEP70          | 1450481_at   | 1430231_a_at   | 0.9303 |
| SOX3    | CEP70          | 1450485_at   | 1430231_a_at   | 0.9344 |
| SALL1   | CEP70          | 1450489_at   | 1430231_a_at   | 0.8322 |
| HMGA2   | CEP70          | 1450780_s_at | 1430231_a_at   | 0.9027 |
| HMGA2   | CEP70          | 1450781_at   | 1430231_a_at   | 0.8286 |
| ZNF451  | CEP70          | 1451816_at   | 1430231_a_at   | 0.8925 |
| NCOR2   | CEP70          | 1451841_a_at | 1430231_a_at   | 0.9433 |
| ZFP2    | CEP70          | 1452025_a_at | 1430231_a_at   | 0.9428 |
| ZBED3   | CEP70          | 1452088_at   | 1430231_a_at   | 0.8579 |
| CENPF   | CEP70          | 1452334_at   | 1430231_a_at   | 0.9128 |
| MLF1IP  | CEP70          | 1452816_at   | 1430231_a_at   | 0.8519 |
| TTF2    | CEP70          | 1452818_at   | 1430231_a_at   | 0.9323 |
| HELLS   | CEP70          | 1453361_at   | 1430231_a_at   | 0.8131 |
| PHF6    | CEP70          | 1453761_at   | 1430231_a_at   | 0.9787 |
| TAF2    | CEP70          | 1457351_at   | 1430231_a_at   | 0.9608 |
| ZNF69   | CEP70          | 1458274_at   | 1430231_a_at   | 0.9097 |
| TGIF2   | NUP205         | 1431115_at   | 1430343_at     | 0.8588 |
| ERCC4   | NUP205         | 1432272_a_at | 1430343_at     | 0.9309 |
| SUV39H2 | NUP205         | 1433996_at   | 1430343_at     | 0.9296 |
| PIF1    | NUP205         | 1436738_at   | 1430343_at     | 0.8681 |

|         |               |              |              |        |
|---------|---------------|--------------|--------------|--------|
| SOX11   | NUP205        | 1436790_a_at | 1430343_at   | 0.8426 |
| RAD51C  | NUP205        | 1438453_at   | 1430343_at   | 0.8978 |
| NKRF    | NUP205        | 1441325_at   | 1430343_at   | 0.9710 |
| TAF1D   | NUP205        | 1442289_at   | 1430343_at   | 0.8692 |
| FOXM1   | NUP205        | 1448834_at   | 1430343_at   | 0.8950 |
| SUPT16H | NUP205        | 1449578_at   | 1430343_at   | 0.9055 |
| TCERG1  | NUP205        | 1450100_a_at | 1430343_at   | 0.9639 |
| ASCL1   | NUP205        | 1450164_at   | 1430343_at   | 0.8958 |
| ZFP354C | NUP205        | 1450321_at   | 1430343_at   | 0.8891 |
| MED1    | NUP205        | 1450402_at   | 1430343_at   | 0.8691 |
| MYBL1   | NUP205        | 1450481_at   | 1430343_at   | 0.9368 |
| SOX3    | NUP205        | 1450485_at   | 1430343_at   | 0.9244 |
| SALL1   | NUP205        | 1450489_at   | 1430343_at   | 0.8274 |
| HMGA2   | NUP205        | 1450780_s_at | 1430343_at   | 0.9033 |
| HMGA2   | NUP205        | 1450781_at   | 1430343_at   | 0.8020 |
| ZNF451  | NUP205        | 1451816_at   | 1430343_at   | 0.9019 |
| NCOR2   | NUP205        | 1451841_a_at | 1430343_at   | 0.8600 |
| ZFP2    | NUP205        | 1452025_a_at | 1430343_at   | 0.8770 |
| ZBED3   | NUP205        | 1452088_at   | 1430343_at   | 0.8774 |
| CENPF   | NUP205        | 1452334_at   | 1430343_at   | 0.8864 |
| MLF1IP  | NUP205        | 1452816_at   | 1430343_at   | 0.9103 |
| TTF2    | NUP205        | 1452818_at   | 1430343_at   | 0.9361 |
| HELLS   | NUP205        | 1453361_at   | 1430343_at   | 0.8470 |
| PHF6    | NUP205        | 1453761_at   | 1430343_at   | 0.9317 |
| TAF2    | NUP205        | 1457351_at   | 1430343_at   | 0.9698 |
| ZNF69   | NUP205        | 1458274_at   | 1430343_at   | 0.9123 |
| TLE4    | DLG5          | 1430384_at   | 1431187_s_at | 0.8574 |
| TLE4    | JAM2          | 1430384_at   | 1431416_a_at | 0.8315 |
| TLE4    | RAB31         | 1430384_at   | 1431691_a_at | 0.8568 |
| TLE4    | ERCC4         | 1430384_at   | 1432272_a_at | 0.8566 |
| TLE4    | ARMC9         | 1430384_at   | 1432383_a_at | 0.8560 |
| TLE4    | NPHP4         | 1430384_at   | 1434024_at   | 0.8045 |
| TLE4    | HEATR5B       | 1430384_at   | 1438085_at   | 0.8233 |
| TLE4    | 4933432K03RIK | 1430384_at   | 1438356_x_at | 0.8127 |
| TLE4    | ADCYAP1R1     | 1430384_at   | 1439042_at   | 0.8262 |
| TLE4    | A1506816      | 1430384_at   | 1439483_at   | 0.8867 |
| TLE4    | INTS10        | 1430384_at   | 1439712_at   | 0.8335 |
| TLE4    | A930024E05RIK | 1430384_at   | 1440206_at   | 0.8012 |
| TLE4    | ASPM          | 1430384_at   | 1441520_at   | 0.8516 |
| TLE4    | TTK           | 1430384_at   | 1442594_at   | 0.8263 |
| TLE4    | BB337104      | 1430384_at   | 1443026_at   | 0.8227 |
| TLE4    | BB130444      | 1430384_at   | 1443410_at   | 0.8840 |
| TLE4    | ZBTB39        | 1430384_at   | 1443880_at   | 0.8499 |
| TLE4    | CDK5RAP2      | 1430384_at   | 1443976_at   | 0.8102 |
| TLE4    | ERCC6L        | 1430384_at   | 1444024_at   | 0.8172 |
| TLE4    | 6530418L21RIK | 1430384_at   | 1444723_at   | 0.8762 |
| TLE4    | BC023969      | 1430384_at   | 1445226_at   | 0.8766 |
| TLE4    | KCND3         | 1430384_at   | 1447513_at   | 0.8415 |
| TLE4    | SEMA6D        | 1430384_at   | 1448060_at   | 0.8538 |
| TLE4    | FOXM1         | 1430384_at   | 1448834_at   | 0.8034 |
| TLE4    | SKP2          | 1430384_at   | 1449293_a_at | 0.8070 |

|         |                       |              |                       |        |
|---------|-----------------------|--------------|-----------------------|--------|
| TLE4    | LFNG                  | 1430384_at   | 1449943_at            | 0.8656 |
| TLE4    | APC                   | 1430384_at   | 1450056_at            | 0.8165 |
| TLE4    | ASCL1                 | 1430384_at   | 1450164_at            | 0.8418 |
| TLE4    | NPAS3                 | 1430384_at   | 1450287_at            | 0.8287 |
| TLE4    | ZFP354C               | 1430384_at   | 1450321_at            | 0.8702 |
| TLE4    | SHC3                  | 1430384_at   | 1450326_at            | 0.8090 |
| TLE4    | MYO10                 | 1430384_at   | 1450651_at            | 0.8392 |
| TLE4    | NCOR2                 | 1430384_at   | 1451841_a_at          | 0.8622 |
| TLE4    | CENPF                 | 1430384_at   | 1452334_at            | 0.8541 |
| TLE4    | ASPM                  | 1430384_at   | 1452459_at            | 0.8154 |
| TLE4    | RHOBTB3               | 1430384_at   | 1453227_at            | 0.8598 |
| TLE4    | CALR3                 | 1430384_at   | 1453232_at            | 0.8679 |
| TLE4    | DHX38                 | 1430384_at   | 1453751_at            | 0.8325 |
| TLE4    | EXOD1                 | 1430384_at   | 1454229_a_at          | 0.8292 |
| TLE4    | BM114403              | 1430384_at   | 1455624_at            | 0.8657 |
| TLE4    | ATP5G2                | 1430384_at   | 1456128_at            | 0.8112 |
| TLE4    | BB053540              | 1430384_at   | 1456840_at            | 0.8061 |
| TLE4    | BM224051              | 1430384_at   | 1458630_at            | 0.8576 |
| TLE4    | 6530418L21RIK         | 1430384_at   | 1459051_at            | 0.8415 |
| TLE4    | AFFX-DapX-5_at        | 1430384_at   | AFFX-DapX-5_at        | 0.8662 |
| TLE4    | AFFX-LysX-5_at        | 1430384_at   | AFFX-LysX-5_at        | 0.8521 |
| TLE4    | AFFX-PheX-5_at        | 1430384_at   | AFFX-PheX-5_at        | 0.8385 |
| TLE4    | AFFX-r2-Bs-dap-5_at   | 1430384_at   | AFFX-r2-Bs-dap-5_at   | 0.8342 |
| TLE4    | AFFX-r2-Bs-lys-5_at   | 1430384_at   | AFFX-r2-Bs-lys-5_at   | 0.8360 |
| TLE4    | AFFX-r2-Bs-thr-5_s_at | 1430384_at   | AFFX-r2-Bs-thr-5_s_at | 0.8888 |
| TLE4    | AFFX-ThrX-5_at        | 1430384_at   | AFFX-ThrX-5_at        | 0.8957 |
| TGIF2   | NCAPD3                | 1431115_at   | 1430782_at            | 0.8712 |
| ERCC4   | NCAPD3                | 1432272_a_at | 1430782_at            | 0.8780 |
| SUV39H2 | NCAPD3                | 1433996_at   | 1430782_at            | 0.9020 |
| PIF1    | NCAPD3                | 1436738_at   | 1430782_at            | 0.8759 |
| RAD51C  | NCAPD3                | 1438453_at   | 1430782_at            | 0.8686 |
| NKRF    | NCAPD3                | 1441325_at   | 1430782_at            | 0.9300 |
| TAF1D   | NCAPD3                | 1442289_at   | 1430782_at            | 0.8815 |
| FOXM1   | NCAPD3                | 1448834_at   | 1430782_at            | 0.8629 |
| SUPT16H | NCAPD3                | 1449578_at   | 1430782_at            | 0.8709 |
| TCERG1  | NCAPD3                | 1450100_a_at | 1430782_at            | 0.9255 |
| ASCL1   | NCAPD3                | 1450164_at   | 1430782_at            | 0.8535 |
| MED1    | NCAPD3                | 1450402_at   | 1430782_at            | 0.8564 |
| MYBL1   | NCAPD3                | 1450481_at   | 1430782_at            | 0.9421 |
| SOX3    | NCAPD3                | 1450485_at   | 1430782_at            | 0.8915 |
| SALL1   | NCAPD3                | 1450489_at   | 1430782_at            | 0.8116 |
| HMGA2   | NCAPD3                | 1450780_s_at | 1430782_at            | 0.9083 |
| HMGA2   | NCAPD3                | 1450781_at   | 1430782_at            | 0.8405 |
| ZNF451  | NCAPD3                | 1451816_at   | 1430782_at            | 0.9013 |
| NCOR2   | NCAPD3                | 1451841_a_at | 1430782_at            | 0.8280 |
| ZFP2    | NCAPD3                | 1452025_a_at | 1430782_at            | 0.8252 |
| ZBED3   | NCAPD3                | 1452088_at   | 1430782_at            | 0.8826 |
| CENPF   | NCAPD3                | 1452334_at   | 1430782_at            | 0.8453 |
| MLF1IP  | NCAPD3                | 1452816_at   | 1430782_at            | 0.9368 |
| TTF2    | NCAPD3                | 1452818_at   | 1430782_at            | 0.9346 |
| HELLS   | NCAPD3                | 1453361_at   | 1430782_at            | 0.8524 |

|        |               |              |              |        |
|--------|---------------|--------------|--------------|--------|
| PHF6   | NCAPD3        | 1453761_at   | 1430782_at   | 0.9248 |
| TAF2   | NCAPD3        | 1457351_at   | 1430782_at   | 0.9420 |
| ZNF69  | NCAPD3        | 1458274_at   | 1430782_at   | 0.8901 |
| PIF1   | RCBTB2        | 1436738_at   | 1431017_at   | 0.8373 |
| TAF1D  | RCBTB2        | 1442289_at   | 1431017_at   | 0.8760 |
| MED1   | RCBTB2        | 1450402_at   | 1431017_at   | 0.8775 |
| MYBL1  | RCBTB2        | 1450481_at   | 1431017_at   | 0.8659 |
| HMGA2  | RCBTB2        | 1450780_s_at | 1431017_at   | 0.8524 |
| HMGA2  | RCBTB2        | 1450781_at   | 1431017_at   | 0.8694 |
| ZNF451 | RCBTB2        | 1451816_at   | 1431017_at   | 0.8844 |
| ZBED3  | RCBTB2        | 1452088_at   | 1431017_at   | 0.8883 |
| MLF1IP | RCBTB2        | 1452816_at   | 1431017_at   | 0.8877 |
| TTF2   | RCBTB2        | 1452818_at   | 1431017_at   | 0.8023 |
| HELLS  | RCBTB2        | 1453361_at   | 1431017_at   | 0.8333 |
| PIF1   | MPHOSPH9      | 1436738_at   | 1431053_at   | 0.8644 |
| TAF1D  | MPHOSPH9      | 1442289_at   | 1431053_at   | 0.8399 |
| MED1   | MPHOSPH9      | 1450402_at   | 1431053_at   | 0.8619 |
| MYBL1  | MPHOSPH9      | 1450481_at   | 1431053_at   | 0.8430 |
| HMGA2  | MPHOSPH9      | 1450780_s_at | 1431053_at   | 0.8669 |
| HMGA2  | MPHOSPH9      | 1450781_at   | 1431053_at   | 0.8550 |
| ZNF451 | MPHOSPH9      | 1451816_at   | 1431053_at   | 0.8461 |
| ZBED3  | MPHOSPH9      | 1452088_at   | 1431053_at   | 0.8668 |
| MLF1IP | MPHOSPH9      | 1452816_at   | 1431053_at   | 0.8296 |
| TTF2   | MPHOSPH9      | 1452818_at   | 1431053_at   | 0.8347 |
| HELLS  | MPHOSPH9      | 1453361_at   | 1431053_at   | 0.8143 |
| TGIF2  | PGAP1         | 1431115_at   | 1431169_at   | 0.8528 |
| TGIF2  | DLG5          | 1431115_at   | 1431187_s_at | 0.8248 |
| TGIF2  | JAM2          | 1431115_at   | 1431416_a_at | 0.8335 |
| TGIF2  | 4933432K03RIK | 1431115_at   | 1431489_at   | 0.8602 |
| TGIF2  | 2610021K21RIK | 1431115_at   | 1431667_s_at | 0.8741 |
| TGIF2  | RAB31         | 1431115_at   | 1431691_a_at | 0.8696 |
| TGIF2  | PIGN          | 1431115_at   | 1432115_a_at | 0.9002 |
| TGIF2  | ERCC4         | 1431115_at   | 1432272_a_at | 0.8935 |
| TGIF2  | ARMC9         | 1431115_at   | 1432383_a_at | 0.8811 |
| TGIF2  | 1700106N22RIK | 1431115_at   | 1432504_at   | 0.8783 |
| TGIF2  | SUV39H2       | 1431115_at   | 1433996_at   | 0.8556 |
| TGIF2  | NPHP4         | 1431115_at   | 1434024_at   | 0.8654 |
| TGIF2  | SOX3          | 1431115_at   | 1435192_at   | 0.8105 |
| TGIF2  | EXOD1         | 1431115_at   | 1435390_at   | 0.8132 |
| TGIF2  | CD109         | 1431115_at   | 1436346_at   | 0.9410 |
| TGIF2  | CEP78         | 1431115_at   | 1436352_at   | 0.8818 |
| TGIF2  | ZBTB12        | 1431115_at   | 1436382_at   | 0.8920 |
| TGIF2  | PIF1          | 1431115_at   | 1436738_at   | 0.8613 |
| TGIF2  | ASCL1         | 1431115_at   | 1437086_at   | 0.8424 |
| TGIF2  | 2810408I11RIK | 1431115_at   | 1437549_at   | 0.9075 |
| TGIF2  | AV164956      | 1431115_at   | 1437673_at   | 0.9242 |
| TGIF2  | HEATR5B       | 1431115_at   | 1438085_at   | 0.8459 |
| TGIF2  | 4933432K03RIK | 1431115_at   | 1438356_x_at | 0.9069 |
| TGIF2  | DHX33         | 1431115_at   | 1438765_at   | 0.8744 |
| TGIF2  | AH11          | 1431115_at   | 1439083_at   | 0.8185 |
| TGIF2  | FANCD2        | 1431115_at   | 1439091_at   | 0.8494 |



|       |               |            |              |        |
|-------|---------------|------------|--------------|--------|
| TGIF2 | AI506816      | 1431115_at | 1439483_at   | 0.8735 |
| TGIF2 | AI746468      | 1431115_at | 1439960_at   | 0.9054 |
| TGIF2 | ABCC12        | 1431115_at | 1439985_at   | 0.9388 |
| TGIF2 | A930024E05RIK | 1431115_at | 1440206_at   | 0.8678 |
| TGIF2 | KIF20B        | 1431115_at | 1440924_at   | 0.8617 |
| TGIF2 | A430071A18RIK | 1431115_at | 1441113_at   | 0.8233 |
| TGIF2 | MATR3         | 1431115_at | 1441272_at   | 0.8757 |
| TGIF2 | KBTBD8        | 1431115_at | 1441275_at   | 0.9052 |
| TGIF2 | NKRF          | 1431115_at | 1441325_at   | 0.9094 |
| TGIF2 | AU043080      | 1431115_at | 1441375_at   | 0.8495 |
| TGIF2 | ASPM          | 1431115_at | 1441520_at   | 0.8020 |
| TGIF2 | D2ERTD750E    | 1431115_at | 1442280_at   | 0.8905 |
| TGIF2 | TAF1D         | 1431115_at | 1442289_at   | 0.8465 |
| TGIF2 | TTK           | 1431115_at | 1442594_at   | 0.9038 |
| TGIF2 | BB337104      | 1431115_at | 1443026_at   | 0.8820 |
| TGIF2 | BB444561      | 1431115_at | 1443171_at   | 0.8752 |
| TGIF2 | BM202761      | 1431115_at | 1443800_at   | 0.8315 |
| TGIF2 | ZBTB39        | 1431115_at | 1443880_at   | 0.8579 |
| TGIF2 | CDK5RAP2      | 1431115_at | 1443976_at   | 0.8553 |
| TGIF2 | ERCC6L        | 1431115_at | 1444024_at   | 0.9148 |
| TGIF2 | AV228095      | 1431115_at | 1444443_at   | 0.8833 |
| TGIF2 | 6530418L21RIK | 1431115_at | 1444723_at   | 0.8451 |
| TGIF2 | MASTL         | 1431115_at | 1444725_at   | 0.8448 |
| TGIF2 | BC023969      | 1431115_at | 1445226_at   | 0.8842 |
| TGIF2 | C530044C16RIK | 1431115_at | 1445247_at   | 0.8321 |
| TGIF2 | AV323315      | 1431115_at | 1445298_at   | 0.8433 |
| TGIF2 | KCND3         | 1431115_at | 1447513_at   | 0.9144 |
| TGIF2 | SEMA6D        | 1431115_at | 1448060_at   | 0.8732 |
| TGIF2 | TEAD2         | 1431115_at | 1448519_at   | 0.8251 |
| TGIF2 | OGG1          | 1431115_at | 1448815_at   | 0.8865 |
| TGIF2 | FOXM1         | 1431115_at | 1448834_at   | 0.9331 |
| TGIF2 | SKP2          | 1431115_at | 1449293_a_at | 0.9136 |
| TGIF2 | SUPT16H       | 1431115_at | 1449578_at   | 0.8705 |
| TGIF2 | CCNB1         | 1431115_at | 1449675_at   | 0.8937 |
| TGIF2 | LFNG          | 1431115_at | 1449943_at   | 0.8802 |
| TGIF2 | APC           | 1431115_at | 1450056_at   | 0.8518 |
| TGIF2 | 4933411K20RIK | 1431115_at | 1450076_at   | 0.8963 |
| TGIF2 | TCERG1        | 1431115_at | 1450100_a_at | 0.9005 |
| TGIF2 | ASCL1         | 1431115_at | 1450164_at   | 0.8711 |
| TGIF2 | NPAS3         | 1431115_at | 1450287_at   | 0.8289 |
| TGIF2 | ZFP354C       | 1431115_at | 1450321_at   | 0.8382 |
| TGIF2 | SHC3          | 1431115_at | 1450326_at   | 0.9082 |
| TGIF2 | MYBL1         | 1431115_at | 1450481_at   | 0.8839 |
| TGIF2 | SOX3          | 1431115_at | 1450485_at   | 0.9096 |
| TGIF2 | HMGA2         | 1431115_at | 1450780_s_at | 0.8683 |
| TGIF2 | HMGA2         | 1431115_at | 1450781_at   | 0.8219 |
| TGIF2 | ZNF451        | 1431115_at | 1451816_at   | 0.8793 |
| TGIF2 | NCOR2         | 1431115_at | 1451841_a_at | 0.8936 |
| TGIF2 | LMNB2         | 1431115_at | 1451849_a_at | 0.9013 |
| TGIF2 | ZFP2          | 1431115_at | 1452025_a_at | 0.8309 |
| TGIF2 | 6720460F02RIK | 1431115_at | 1452073_at   | 0.9257 |

|         |                     |              |                     |        |
|---------|---------------------|--------------|---------------------|--------|
| TGIF2   | ZBED3               | 1431115_at   | 1452088_at          | 0.8482 |
| TGIF2   | RRP1B               | 1431115_at   | 1452119_at          | 0.8948 |
| TGIF2   | CENPF               | 1431115_at   | 1452334_at          | 0.8192 |
| TGIF2   | ASPM                | 1431115_at   | 1452459_at          | 0.8934 |
| TGIF2   | MLF1IP              | 1431115_at   | 1452816_at          | 0.8570 |
| TGIF2   | TTF2                | 1431115_at   | 1452818_at          | 0.9480 |
| TGIF2   | TMEM138             | 1431115_at   | 1452978_at          | 0.8517 |
| TGIF2   | RHOBTB3             | 1431115_at   | 1453227_at          | 0.8951 |
| TGIF2   | HELLS               | 1431115_at   | 1453361_at          | 0.8260 |
| TGIF2   | TROAP               | 1431115_at   | 1453370_at          | 0.9172 |
| TGIF2   | CEP55               | 1431115_at   | 1453683_a_at        | 0.9115 |
| TGIF2   | DHX38               | 1431115_at   | 1453751_at          | 0.9016 |
| TGIF2   | PHF6                | 1431115_at   | 1453761_at          | 0.9074 |
| TGIF2   | NETO2               | 1431115_at   | 1454032_at          | 0.8417 |
| TGIF2   | CCDC77              | 1431115_at   | 1454228_a_at        | 0.8877 |
| TGIF2   | EXOD1               | 1431115_at   | 1454229_a_at        | 0.9027 |
| TGIF2   | 5730471H19RIK       | 1431115_at   | 1455038_at          | 0.8202 |
| TGIF2   | UTP23               | 1431115_at   | 1455259_a_at        | 0.8823 |
| TGIF2   | IER5L               | 1431115_at   | 1455881_at          | 0.8178 |
| TGIF2   | 2700049P18RIK       | 1431115_at   | 1456163_at          | 0.8864 |
| TGIF2   | RTEL1               | 1431115_at   | 1456729_x_at        | 0.8111 |
| TGIF2   | BB053540            | 1431115_at   | 1456840_at          | 0.8023 |
| TGIF2   | AV254764            | 1431115_at   | 1456951_at          | 0.8218 |
| TGIF2   | TAF2                | 1431115_at   | 1457351_at          | 0.9083 |
| TGIF2   | ZNF69               | 1431115_at   | 1458274_at          | 0.8513 |
| TGIF2   | MTR                 | 1431115_at   | 1458532_at          | 0.8677 |
| TGIF2   | RNF219              | 1431115_at   | 1458636_at          | 0.9173 |
| TGIF2   | BB463474            | 1431115_at   | 1458902_at          | 0.8076 |
| TGIF2   | AFFX-DapX-5_at      | 1431115_at   | AFFX-DapX-5_at      | 0.8378 |
| TGIF2   | AFFX-r2-Bs-dap-5_at | 1431115_at   | AFFX-r2-Bs-dap-5_at | 0.8324 |
| TGIF2   | AFFX-r2-Bs-lys-5_at | 1431115_at   | AFFX-r2-Bs-lys-5_at | 0.8102 |
| ERCC4   | PGAP1               | 1432272_a_at | 1431169_at          | 0.9219 |
| SUV39H2 | PGAP1               | 1433996_at   | 1431169_at          | 0.8939 |
| PIF1    | PGAP1               | 1436738_at   | 1431169_at          | 0.8668 |
| SOX11   | PGAP1               | 1436790_a_at | 1431169_at          | 0.8251 |
| RAD51C  | PGAP1               | 1438453_at   | 1431169_at          | 0.8942 |
| NKRF    | PGAP1               | 1441325_at   | 1431169_at          | 0.9442 |
| TAF1D   | PGAP1               | 1442289_at   | 1431169_at          | 0.8851 |
| FOXO1   | PGAP1               | 1448834_at   | 1431169_at          | 0.8740 |
| SUPT16H | PGAP1               | 1449578_at   | 1431169_at          | 0.9033 |
| TCERG1  | PGAP1               | 1450100_a_at | 1431169_at          | 0.9459 |
| ASCL1   | PGAP1               | 1450164_at   | 1431169_at          | 0.8940 |
| ZFP354C | PGAP1               | 1450321_at   | 1431169_at          | 0.8450 |
| MED1    | PGAP1               | 1450402_at   | 1431169_at          | 0.8080 |
| MYBL1   | PGAP1               | 1450481_at   | 1431169_at          | 0.9218 |
| SOX3    | PGAP1               | 1450485_at   | 1431169_at          | 0.9066 |
| SALL1   | PGAP1               | 1450489_at   | 1431169_at          | 0.8875 |
| HMGA2   | PGAP1               | 1450780_s_at | 1431169_at          | 0.8894 |
| HMGA2   | PGAP1               | 1450781_at   | 1431169_at          | 0.8091 |
| ZNF451  | PGAP1               | 1451816_at   | 1431169_at          | 0.9073 |
| NCOR2   | PGAP1               | 1451841_a_at | 1431169_at          | 0.8688 |

|         |       |              |              |        |
|---------|-------|--------------|--------------|--------|
| ZFP2    | PGAP1 | 1452025_a_at | 1431169_at   | 0.8936 |
| ZBED3   | PGAP1 | 1452088_at   | 1431169_at   | 0.8661 |
| CENPF   | PGAP1 | 1452334_at   | 1431169_at   | 0.8633 |
| MLF1IP  | PGAP1 | 1452816_at   | 1431169_at   | 0.8925 |
| TTF2    | PGAP1 | 1452818_at   | 1431169_at   | 0.9052 |
| HELLS   | PGAP1 | 1453361_at   | 1431169_at   | 0.8265 |
| PHF6    | PGAP1 | 1453761_at   | 1431169_at   | 0.9511 |
| TAF2    | PGAP1 | 1457351_at   | 1431169_at   | 0.9488 |
| ZNF69   | PGAP1 | 1458274_at   | 1431169_at   | 0.8419 |
| ERCC4   | DLG5  | 1432272_a_at | 1431187_s_at | 0.9255 |
| SUV39H2 | DLG5  | 1433996_at   | 1431187_s_at | 0.8927 |
| PIF1    | DLG5  | 1436738_at   | 1431187_s_at | 0.8065 |
| SOX11   | DLG5  | 1436790_a_at | 1431187_s_at | 0.8512 |
| ASCL1   | DLG5  | 1437086_at   | 1431187_s_at | 0.8012 |
| RAD51C  | DLG5  | 1438453_at   | 1431187_s_at | 0.8531 |
| NKRF    | DLG5  | 1441325_at   | 1431187_s_at | 0.9350 |
| FOXM1   | DLG5  | 1448834_at   | 1431187_s_at | 0.8767 |
| SOX4    | DLG5  | 1449370_at   | 1431187_s_at | 0.8056 |
| SUPT16H | DLG5  | 1449578_at   | 1431187_s_at | 0.8760 |
| TCERG1  | DLG5  | 1450100_a_at | 1431187_s_at | 0.9328 |
| ASCL1   | DLG5  | 1450164_at   | 1431187_s_at | 0.8953 |
| NPAS3   | DLG5  | 1450287_at   | 1431187_s_at | 0.8035 |
| ZFP354C | DLG5  | 1450321_at   | 1431187_s_at | 0.8985 |
| MYBL1   | DLG5  | 1450481_at   | 1431187_s_at | 0.8652 |
| SOX3    | DLG5  | 1450485_at   | 1431187_s_at | 0.9280 |
| HMGA2   | DLG5  | 1450780_s_at | 1431187_s_at | 0.8379 |
| ZNF451  | DLG5  | 1451816_at   | 1431187_s_at | 0.8343 |
| NCOR2   | DLG5  | 1451841_a_at | 1431187_s_at | 0.8924 |
| ZFP2    | DLG5  | 1452025_a_at | 1431187_s_at | 0.8701 |
| ZBED3   | DLG5  | 1452088_at   | 1431187_s_at | 0.8255 |
| CENPF   | DLG5  | 1452334_at   | 1431187_s_at | 0.8799 |
| MLF1IP  | DLG5  | 1452816_at   | 1431187_s_at | 0.8088 |
| TTF2    | DLG5  | 1452818_at   | 1431187_s_at | 0.8823 |
| HELLS   | DLG5  | 1453361_at   | 1431187_s_at | 0.8029 |
| PHF6    | DLG5  | 1453761_at   | 1431187_s_at | 0.9193 |
| TAF2    | DLG5  | 1457351_at   | 1431187_s_at | 0.9346 |
| ZNF69   | DLG5  | 1458274_at   | 1431187_s_at | 0.8411 |
| PIF1    | MATR3 | 1436738_at   | 1431235_at   | 0.8724 |
| TAF1D   | MATR3 | 1442289_at   | 1431235_at   | 0.9361 |
| MED1    | MATR3 | 1450402_at   | 1431235_at   | 0.9590 |
| MYBL1   | MATR3 | 1450481_at   | 1431235_at   | 0.8919 |
| HMGA2   | MATR3 | 1450780_s_at | 1431235_at   | 0.8893 |
| HMGA2   | MATR3 | 1450781_at   | 1431235_at   | 0.9497 |
| ZNF451  | MATR3 | 1451816_at   | 1431235_at   | 0.9232 |
| ZBED3   | MATR3 | 1452088_at   | 1431235_at   | 0.9393 |
| MLF1IP  | MATR3 | 1452816_at   | 1431235_at   | 0.8813 |
| TTF2    | MATR3 | 1452818_at   | 1431235_at   | 0.8169 |
| HELLS   | MATR3 | 1453361_at   | 1431235_at   | 0.8939 |
| ERCC4   | PVT1  | 1432272_a_at | 1431352_s_at | 0.9115 |
| SUV39H2 | PVT1  | 1433996_at   | 1431352_s_at | 0.8053 |
| SOX11   | PVT1  | 1436790_a_at | 1431352_s_at | 0.9022 |

|         |               |              |              |        |
|---------|---------------|--------------|--------------|--------|
| RAD51C  | PVT1          | 1438453_at   | 1431352_s_at | 0.8108 |
| NKRF    | PVT1          | 1441325_at   | 1431352_s_at | 0.8774 |
| FOXM1   | PVT1          | 1448834_at   | 1431352_s_at | 0.8273 |
| SOX4    | PVT1          | 1449370_at   | 1431352_s_at | 0.8340 |
| SUPT16H | PVT1          | 1449578_at   | 1431352_s_at | 0.8394 |
| TCERG1  | PVT1          | 1450100_a_at | 1431352_s_at | 0.8770 |
| ASCL1   | PVT1          | 1450164_at   | 1431352_s_at | 0.8753 |
| ZFP354C | PVT1          | 1450321_at   | 1431352_s_at | 0.8685 |
| SOX3    | PVT1          | 1450485_at   | 1431352_s_at | 0.8647 |
| NCOR2   | PVT1          | 1451841_a_at | 1431352_s_at | 0.8967 |
| ZFP2    | PVT1          | 1452025_a_at | 1431352_s_at | 0.8659 |
| CENPF   | PVT1          | 1452334_at   | 1431352_s_at | 0.8615 |
| TTF2    | PVT1          | 1452818_at   | 1431352_s_at | 0.8110 |
| PHF6    | PVT1          | 1453761_at   | 1431352_s_at | 0.8802 |
| TAF2    | PVT1          | 1457351_at   | 1431352_s_at | 0.8719 |
| ERCC4   | JAM2          | 1432272_a_at | 1431416_a_at | 0.8558 |
| SOX3    | JAM2          | 1435192_at   | 1431416_a_at | 0.8287 |
| ASCL1   | JAM2          | 1437086_at   | 1431416_a_at | 0.8544 |
| NKRF    | JAM2          | 1441325_at   | 1431416_a_at | 0.8336 |
| FOXM1   | JAM2          | 1448834_at   | 1431416_a_at | 0.8391 |
| TCERG1  | JAM2          | 1450100_a_at | 1431416_a_at | 0.8259 |
| ASCL1   | JAM2          | 1450164_at   | 1431416_a_at | 0.8336 |
| NPAS3   | JAM2          | 1450287_at   | 1431416_a_at | 0.8428 |
| ZFP354C | JAM2          | 1450321_at   | 1431416_a_at | 0.8273 |
| SOX3    | JAM2          | 1450485_at   | 1431416_a_at | 0.8289 |
| NCOR2   | JAM2          | 1451841_a_at | 1431416_a_at | 0.8606 |
| ZFP2    | JAM2          | 1452025_a_at | 1431416_a_at | 0.8158 |
| CENPF   | JAM2          | 1452334_at   | 1431416_a_at | 0.8175 |
| TTF2    | JAM2          | 1452818_at   | 1431416_a_at | 0.8271 |
| PHF6    | JAM2          | 1453761_at   | 1431416_a_at | 0.8380 |
| TAF2    | JAM2          | 1457351_at   | 1431416_a_at | 0.8364 |
| ERCC4   | 4933432K03RIK | 1432272_a_at | 1431489_at   | 0.8243 |
| SUV39H2 | 4933432K03RIK | 1433996_at   | 1431489_at   | 0.8547 |
| PIF1    | 4933432K03RIK | 1436738_at   | 1431489_at   | 0.9418 |
| RAD51C  | 4933432K03RIK | 1438453_at   | 1431489_at   | 0.8548 |
| NKRF    | 4933432K03RIK | 1441325_at   | 1431489_at   | 0.8871 |
| TAF1D   | 4933432K03RIK | 1442289_at   | 1431489_at   | 0.9460 |
| FOXM1   | 4933432K03RIK | 1448834_at   | 1431489_at   | 0.8143 |
| SUPT16H | 4933432K03RIK | 1449578_at   | 1431489_at   | 0.8676 |
| TCERG1  | 4933432K03RIK | 1450100_a_at | 1431489_at   | 0.8919 |
| ASCL1   | 4933432K03RIK | 1450164_at   | 1431489_at   | 0.8200 |
| MED1    | 4933432K03RIK | 1450402_at   | 1431489_at   | 0.8613 |
| MYBL1   | 4933432K03RIK | 1450481_at   | 1431489_at   | 0.9421 |
| SOX3    | 4933432K03RIK | 1450485_at   | 1431489_at   | 0.8918 |
| SALL1   | 4933432K03RIK | 1450489_at   | 1431489_at   | 0.8477 |
| HMGA2   | 4933432K03RIK | 1450780_s_at | 1431489_at   | 0.9405 |
| HMGA2   | 4933432K03RIK | 1450781_at   | 1431489_at   | 0.9700 |
| ZNF451  | 4933432K03RIK | 1451816_at   | 1431489_at   | 0.9654 |
| NCOR2   | 4933432K03RIK | 1451841_a_at | 1431489_at   | 0.8080 |
| ZFP2    | 4933432K03RIK | 1452025_a_at | 1431489_at   | 0.8128 |
| ZBED3   | 4933432K03RIK | 1452088_at   | 1431489_at   | 0.9617 |

|         |               |              |              |        |
|---------|---------------|--------------|--------------|--------|
| MLF1IP  | 4933432K03RIK | 1452816_at   | 1431489_at   | 0.9027 |
| TTF2    | 4933432K03RIK | 1452818_at   | 1431489_at   | 0.9129 |
| HELLS   | 4933432K03RIK | 1453361_at   | 1431489_at   | 0.9369 |
| PHF6    | 4933432K03RIK | 1453761_at   | 1431489_at   | 0.9266 |
| TAF2    | 4933432K03RIK | 1457351_at   | 1431489_at   | 0.8929 |
| ZNF69   | 4933432K03RIK | 1458274_at   | 1431489_at   | 0.8141 |
| PIF1    | PPIH          | 1436738_at   | 1431505_at   | 0.8003 |
| TAF1D   | PPIH          | 1442289_at   | 1431505_at   | 0.8665 |
| MED1    | PPIH          | 1450402_at   | 1431505_at   | 0.8714 |
| MYBL1   | PPIH          | 1450481_at   | 1431505_at   | 0.8407 |
| HMGA2   | PPIH          | 1450780_s_at | 1431505_at   | 0.8220 |
| HMGA2   | PPIH          | 1450781_at   | 1431505_at   | 0.8531 |
| ZNF451  | PPIH          | 1451816_at   | 1431505_at   | 0.8459 |
| ZBED3   | PPIH          | 1452088_at   | 1431505_at   | 0.8454 |
| MLF1IP  | PPIH          | 1452816_at   | 1431505_at   | 0.8344 |
| ERCC4   | 2610021K21RIK | 1432272_a_at | 1431667_s_at | 0.9101 |
| SUV39H2 | 2610021K21RIK | 1433996_at   | 1431667_s_at | 0.9398 |
| PIF1    | 2610021K21RIK | 1436738_at   | 1431667_s_at | 0.8958 |
| SOX11   | 2610021K21RIK | 1436790_a_at | 1431667_s_at | 0.8290 |
| RAD51C  | 2610021K21RIK | 1438453_at   | 1431667_s_at | 0.9009 |
| NKRF    | 2610021K21RIK | 1441325_at   | 1431667_s_at | 0.9714 |
| TAF1D   | 2610021K21RIK | 1442289_at   | 1431667_s_at | 0.8983 |
| FOXM1   | 2610021K21RIK | 1448834_at   | 1431667_s_at | 0.8899 |
| SUPT16H | 2610021K21RIK | 1449578_at   | 1431667_s_at | 0.9080 |
| TCERG1  | 2610021K21RIK | 1450100_a_at | 1431667_s_at | 0.9531 |
| ASCL1   | 2610021K21RIK | 1450164_at   | 1431667_s_at | 0.8882 |
| ZFP354C | 2610021K21RIK | 1450321_at   | 1431667_s_at | 0.8345 |
| MED1    | 2610021K21RIK | 1450402_at   | 1431667_s_at | 0.8810 |
| MYBL1   | 2610021K21RIK | 1450481_at   | 1431667_s_at | 0.9540 |
| SOX3    | 2610021K21RIK | 1450485_at   | 1431667_s_at | 0.9166 |
| SALL1   | 2610021K21RIK | 1450489_at   | 1431667_s_at | 0.8261 |
| HMGA2   | 2610021K21RIK | 1450780_s_at | 1431667_s_at | 0.9204 |
| HMGA2   | 2610021K21RIK | 1450781_at   | 1431667_s_at | 0.8196 |
| ZNF451  | 2610021K21RIK | 1451816_at   | 1431667_s_at | 0.9299 |
| NCOR2   | 2610021K21RIK | 1451841_a_at | 1431667_s_at | 0.8454 |
| ZFP2    | 2610021K21RIK | 1452025_a_at | 1431667_s_at | 0.8612 |
| ZBED3   | 2610021K21RIK | 1452088_at   | 1431667_s_at | 0.8936 |
| CENPF   | 2610021K21RIK | 1452334_at   | 1431667_s_at | 0.8741 |
| MLF1IP  | 2610021K21RIK | 1452816_at   | 1431667_s_at | 0.9653 |
| TTF2    | 2610021K21RIK | 1452818_at   | 1431667_s_at | 0.9399 |
| HELLS   | 2610021K21RIK | 1453361_at   | 1431667_s_at | 0.8618 |
| PHF6    | 2610021K21RIK | 1453761_at   | 1431667_s_at | 0.9457 |
| TAF2    | 2610021K21RIK | 1457351_at   | 1431667_s_at | 0.9726 |
| ZNF69   | 2610021K21RIK | 1458274_at   | 1431667_s_at | 0.8833 |
| ERCC4   | RAB31         | 1432272_a_at | 1431691_a_at | 0.9257 |
| SOX3    | RAB31         | 1435192_at   | 1431691_a_at | 0.8239 |
| ASCL1   | RAB31         | 1437086_at   | 1431691_a_at | 0.8558 |
| RAD51C  | RAB31         | 1438453_at   | 1431691_a_at | 0.8034 |
| NKRF    | RAB31         | 1441325_at   | 1431691_a_at | 0.8880 |
| FOXM1   | RAB31         | 1448834_at   | 1431691_a_at | 0.9103 |
| SUPT16H | RAB31         | 1449578_at   | 1431691_a_at | 0.8403 |

|         |               |              |              |        |
|---------|---------------|--------------|--------------|--------|
| TCERG1  | RAB31         | 1450100_at   | 1431691_a_at | 0.8857 |
| ASCL1   | RAB31         | 1450164_at   | 1431691_a_at | 0.9206 |
| NPAS3   | RAB31         | 1450287_at   | 1431691_a_at | 0.8298 |
| ZFP354C | RAB31         | 1450321_at   | 1431691_a_at | 0.8986 |
| MYBL1   | RAB31         | 1450481_at   | 1431691_a_at | 0.8080 |
| SOX3    | RAB31         | 1450485_at   | 1431691_a_at | 0.8915 |
| SALL1   | RAB31         | 1450489_at   | 1431691_a_at | 0.8014 |
| NCOR2   | RAB31         | 1451841_a_at | 1431691_a_at | 0.9322 |
| ZFP2    | RAB31         | 1452025_a_at | 1431691_a_at | 0.9283 |
| CENPF   | RAB31         | 1452334_at   | 1431691_a_at | 0.8833 |
| TTF2    | RAB31         | 1452818_at   | 1431691_a_at | 0.8632 |
| PHF6    | RAB31         | 1453761_at   | 1431691_a_at | 0.8933 |
| TAF2    | RAB31         | 1457351_at   | 1431691_a_at | 0.8877 |
| ERCC4   | PIGN          | 1432272_a_at | 1432115_a_at | 0.9451 |
| SUV39H2 | PIGN          | 1433996_at   | 1432115_a_at | 0.9519 |
| PIF1    | PIGN          | 1436738_at   | 1432115_a_at | 0.9199 |
| SOX11   | PIGN          | 1436790_a_at | 1432115_a_at | 0.8652 |
| ASCL1   | PIGN          | 1437086_at   | 1432115_a_at | 0.8380 |
| RAD51C  | PIGN          | 1438453_at   | 1432115_a_at | 0.9295 |
| NKRF    | PIGN          | 1441325_at   | 1432115_a_at | 0.9814 |
| TAF1D   | PIGN          | 1442289_at   | 1432115_a_at | 0.9234 |
| FOXM1   | PIGN          | 1448834_at   | 1432115_a_at | 0.9211 |
| SOX4    | PIGN          | 1449370_at   | 1432115_a_at | 0.8124 |
| SUPT16H | PIGN          | 1449578_at   | 1432115_a_at | 0.9429 |
| TCERG1  | PIGN          | 1450100_a_at | 1432115_a_at | 0.9795 |
| ASCL1   | PIGN          | 1450164_at   | 1432115_a_at | 0.9305 |
| ZFP354C | PIGN          | 1450321_at   | 1432115_a_at | 0.8653 |
| MED1    | PIGN          | 1450402_at   | 1432115_a_at | 0.8696 |
| MYBL1   | PIGN          | 1450481_at   | 1432115_a_at | 0.9752 |
| SOX3    | PIGN          | 1450485_at   | 1432115_a_at | 0.9368 |
| SALL1   | PIGN          | 1450489_at   | 1432115_a_at | 0.8461 |
| HMGA2   | PIGN          | 1450780_s_at | 1432115_a_at | 0.9423 |
| HMGA2   | PIGN          | 1450781_at   | 1432115_a_at | 0.8522 |
| ZNF451  | PIGN          | 1451816_at   | 1432115_a_at | 0.9513 |
| NCOR2   | PIGN          | 1451841_a_at | 1432115_a_at | 0.8952 |
| ZFP2    | PIGN          | 1452025_a_at | 1432115_a_at | 0.9099 |
| ZBED3   | PIGN          | 1452088_at   | 1432115_a_at | 0.9078 |
| CENPF   | PIGN          | 1452334_at   | 1432115_a_at | 0.8994 |
| MLF1IP  | PIGN          | 1452816_at   | 1432115_a_at | 0.9496 |
| TTF2    | PIGN          | 1452818_at   | 1432115_a_at | 0.9525 |
| HELLS   | PIGN          | 1453361_at   | 1432115_a_at | 0.8806 |
| PHF6    | PIGN          | 1453761_at   | 1432115_a_at | 0.9861 |
| TAF2    | PIGN          | 1457351_at   | 1432115_a_at | 0.9862 |
| ZNF69   | PIGN          | 1458274_at   | 1432115_a_at | 0.9001 |
| ERCC4   | ARMC9         | 1432272_a_at | 1432383_a_at | 0.9918 |
| ERCC4   | 1700106N22RIK | 1432272_a_at | 1432504_at   | 0.8856 |
| ERCC4   | SUV39H2       | 1432272_a_at | 1433996_at   | 0.8937 |
| ERCC4   | NPHP4         | 1432272_a_at | 1434024_at   | 0.9558 |
| ERCC4   | SRGAP2        | 1432272_a_at | 1434407_at   | 0.9102 |
| ERCC4   | EXOD1         | 1432272_a_at | 1435390_at   | 0.8546 |
| ERCC4   | CD109         | 1432272_a_at | 1436346_at   | 0.9502 |

|       |               |              |              |        |
|-------|---------------|--------------|--------------|--------|
| ERCC4 | CEP78         | 1432272_a_at | 1436352_at   | 0.8395 |
| ERCC4 | ZBTB12        | 1432272_a_at | 1436382_at   | 0.8819 |
| ERCC4 | SDC3          | 1432272_a_at | 1436482_a_at | 0.8775 |
| ERCC4 | PIF1          | 1432272_a_at | 1436738_at   | 0.8355 |
| ERCC4 | SOX11         | 1432272_a_at | 1436790_a_at | 0.9070 |
| ERCC4 | ASCL1         | 1432272_a_at | 1437086_at   | 0.8579 |
| ERCC4 | LRRC4B        | 1432272_a_at | 1437183_at   | 0.8045 |
| ERCC4 | 2810408I11RIK | 1432272_a_at | 1437549_at   | 0.9217 |
| ERCC4 | AV164956      | 1432272_a_at | 1437673_at   | 0.9133 |
| ERCC4 | HEATR5B       | 1432272_a_at | 1438085_at   | 0.9560 |
| ERCC4 | 4933432K03RIK | 1432272_a_at | 1438356_x_at | 0.9495 |
| ERCC4 | RAD51C        | 1432272_a_at | 1438453_at   | 0.8834 |
| ERCC4 | DHX33         | 1432272_a_at | 1438765_at   | 0.9518 |
| ERCC4 | AHI1          | 1432272_a_at | 1439083_at   | 0.8744 |
| ERCC4 | FANCD2        | 1432272_a_at | 1439091_at   | 0.9071 |
| ERCC4 | A1506816      | 1432272_a_at | 1439483_at   | 0.9895 |
| ERCC4 | A1746468      | 1432272_a_at | 1439960_at   | 0.9450 |
| ERCC4 | ABCC12        | 1432272_a_at | 1439985_at   | 0.8521 |
| ERCC4 | A930024E05RIK | 1432272_a_at | 1440206_at   | 0.9576 |
| ERCC4 | WDR35         | 1432272_a_at | 1440318_at   | 0.8201 |
| ERCC4 | KIF20B        | 1432272_a_at | 1440924_at   | 0.8881 |
| ERCC4 | MATR3         | 1432272_a_at | 1441272_at   | 0.8712 |
| ERCC4 | KBTBD8        | 1432272_a_at | 1441275_at   | 0.9384 |
| ERCC4 | NKRF          | 1432272_a_at | 1441325_at   | 0.9675 |
| ERCC4 | AU043080      | 1432272_a_at | 1441375_at   | 0.9383 |
| ERCC4 | ASPM          | 1432272_a_at | 1441520_at   | 0.9482 |
| ERCC4 | D2ERTD750E    | 1432272_a_at | 1442280_at   | 0.8607 |
| ERCC4 | TAF1D         | 1432272_a_at | 1442289_at   | 0.8029 |
| ERCC4 | NUP188        | 1432272_a_at | 1442314_at   | 0.8513 |
| ERCC4 | TTK           | 1432272_a_at | 1442594_at   | 0.9715 |
| ERCC4 | AW545941      | 1432272_a_at | 1443007_at   | 0.8175 |
| ERCC4 | BB337104      | 1432272_a_at | 1443026_at   | 0.8790 |
| ERCC4 | BB444561      | 1432272_a_at | 1443171_at   | 0.9346 |
| ERCC4 | BB340127      | 1432272_a_at | 1443230_at   | 0.8415 |
| ERCC4 | BB130444      | 1432272_a_at | 1443410_at   | 0.8964 |
| ERCC4 | ZBTB39        | 1432272_a_at | 1443880_at   | 0.9388 |
| ERCC4 | CDK5RAP2      | 1432272_a_at | 1443976_at   | 0.9150 |
| ERCC4 | ERCC6L        | 1432272_a_at | 1444024_at   | 0.9820 |
| ERCC4 | AV228095      | 1432272_a_at | 1444443_at   | 0.9316 |
| ERCC4 | 6530418L21RIK | 1432272_a_at | 1444723_at   | 0.9652 |
| ERCC4 | MASTL         | 1432272_a_at | 1444725_at   | 0.8744 |
| ERCC4 | BC023969      | 1432272_a_at | 1445226_at   | 0.9894 |
| ERCC4 | AV323315      | 1432272_a_at | 1445298_at   | 0.8896 |
| ERCC4 | KCND3         | 1432272_a_at | 1447513_at   | 0.9860 |
| ERCC4 | SEMA6D        | 1432272_a_at | 1448060_at   | 0.9100 |
| ERCC4 | OGG1          | 1432272_a_at | 1448815_at   | 0.9173 |
| ERCC4 | FOXM1         | 1432272_a_at | 1448834_at   | 0.9416 |
| ERCC4 | SKP2          | 1432272_a_at | 1449293_a_at | 0.9731 |
| ERCC4 | SOX4          | 1432272_a_at | 1449370_at   | 0.8648 |
| ERCC4 | SUPT16H       | 1432272_a_at | 1449578_at   | 0.9204 |
| ERCC4 | CCNB1         | 1432272_a_at | 1449675_at   | 0.9603 |

|       |                |              |                |        |
|-------|----------------|--------------|----------------|--------|
| ERCC4 | LFNG           | 1432272_a_at | 1449943_at     | 0.9391 |
| ERCC4 | APC            | 1432272_a_at | 1450056_at     | 0.8775 |
| ERCC4 | 4933411K20RIK  | 1432272_a_at | 1450076_at     | 0.9569 |
| ERCC4 | TCERG1         | 1432272_a_at | 1450100_a_at   | 0.9673 |
| ERCC4 | ASCL1          | 1432272_a_at | 1450164_at     | 0.9635 |
| ERCC4 | PCDHB11        | 1432272_a_at | 1450270_at     | 0.8603 |
| ERCC4 | ZFP354C        | 1432272_a_at | 1450321_at     | 0.9676 |
| ERCC4 | SHC3           | 1432272_a_at | 1450326_at     | 0.8614 |
| ERCC4 | MYBL1          | 1432272_a_at | 1450481_at     | 0.8854 |
| ERCC4 | SOX3           | 1432272_a_at | 1450485_at     | 0.9583 |
| ERCC4 | SALL1          | 1432272_a_at | 1450489_at     | 0.8027 |
| ERCC4 | HMGA2          | 1432272_a_at | 1450780_s_at   | 0.8577 |
| ERCC4 | ZNF451         | 1432272_a_at | 1451816_at     | 0.8494 |
| ERCC4 | NCOR2          | 1432272_a_at | 1451841_a_at   | 0.9787 |
| ERCC4 | LMNB2          | 1432272_a_at | 1451849_a_at   | 0.8694 |
| ERCC4 | ZFP2           | 1432272_a_at | 1452025_a_at   | 0.9473 |
| ERCC4 | 6720460F02RIK  | 1432272_a_at | 1452073_at     | 0.9344 |
| ERCC4 | ZBED3          | 1432272_a_at | 1452088_at     | 0.8055 |
| ERCC4 | RRP1B          | 1432272_a_at | 1452119_at     | 0.8973 |
| ERCC4 | NOVA1          | 1432272_a_at | 1452245_at     | 0.8656 |
| ERCC4 | PVT1           | 1432272_a_at | 1452324_at     | 0.8233 |
| ERCC4 | CENPF          | 1432272_a_at | 1452334_at     | 0.9431 |
| ERCC4 | ADAMTS7        | 1432272_a_at | 1452339_at     | 0.8713 |
| ERCC4 | ASPM           | 1432272_a_at | 1452459_at     | 0.9555 |
| ERCC4 | MLF1IP         | 1432272_a_at | 1452816_at     | 0.8349 |
| ERCC4 | TTF2           | 1432272_a_at | 1452818_at     | 0.9164 |
| ERCC4 | TMEM138        | 1432272_a_at | 1452978_at     | 0.8579 |
| ERCC4 | RHOBTB3        | 1432272_a_at | 1453227_at     | 0.9912 |
| ERCC4 | CALR3          | 1432272_a_at | 1453232_at     | 0.8537 |
| ERCC4 | TROAP          | 1432272_a_at | 1453370_at     | 0.9520 |
| ERCC4 | CEP55          | 1432272_a_at | 1453683_a_at   | 0.9471 |
| ERCC4 | DHX38          | 1432272_a_at | 1453751_at     | 0.9682 |
| ERCC4 | PHF6           | 1432272_a_at | 1453761_at     | 0.9554 |
| ERCC4 | FAM110A        | 1432272_a_at | 1453768_a_at   | 0.8840 |
| ERCC4 | NETO2          | 1432272_a_at | 1454032_at     | 0.8924 |
| ERCC4 | CCDC77         | 1432272_a_at | 1454228_a_at   | 0.8944 |
| ERCC4 | EXOD1          | 1432272_a_at | 1454229_a_at   | 0.9777 |
| ERCC4 | XKR5           | 1432272_a_at | 1455127_at     | 0.8578 |
| ERCC4 | UTP23          | 1432272_a_at | 1455259_a_at   | 0.9254 |
| ERCC4 | ATP5G2         | 1432272_a_at | 1456128_at     | 0.8668 |
| ERCC4 | 2700049P18RIK  | 1432272_a_at | 1456163_at     | 0.9145 |
| ERCC4 | BB053540       | 1432272_a_at | 1456840_at     | 0.8503 |
| ERCC4 | AV254764       | 1432272_a_at | 1456951_at     | 0.8380 |
| ERCC4 | TAF2           | 1432272_a_at | 1457351_at     | 0.9646 |
| ERCC4 | ZNF69          | 1432272_a_at | 1458274_at     | 0.8916 |
| ERCC4 | MTR            | 1432272_a_at | 1458532_at     | 0.8499 |
| ERCC4 | BM224051       | 1432272_a_at | 1458630_at     | 0.8547 |
| ERCC4 | RNF219         | 1432272_a_at | 1458636_at     | 0.9605 |
| ERCC4 | 6530418L21RIK  | 1432272_a_at | 1459051_at     | 0.9178 |
| ERCC4 | AFFX-DapX-5_at | 1432272_a_at | AFFX-DapX-5_at | 0.9231 |
| ERCC4 | AFFX-LysX-5_at | 1432272_a_at | AFFX-LysX-5_at | 0.8735 |



|         |                       |              |                       |        |
|---------|-----------------------|--------------|-----------------------|--------|
| ERCC4   | AFFX-r2-Bs-dap-5_at   | 1432272_a_at | AFFX-r2-Bs-dap-5_at   | 0.9141 |
| ERCC4   | AFFX-r2-Bs-lys-5_at   | 1432272_a_at | AFFX-r2-Bs-lys-5_at   | 0.9003 |
| ERCC4   | AFFX-r2-Bs-thr-5_s_at | 1432272_a_at | AFFX-r2-Bs-thr-5_s_at | 0.9094 |
| ERCC4   | AFFX-ThrX-5_at        | 1432272_a_at | AFFX-ThrX-5_at        | 0.9148 |
| SUV39H2 | MIPOL1                | 1433996_at   | 1432284_at            | 0.8253 |
| PIF1    | MIPOL1                | 1436738_at   | 1432284_at            | 0.9220 |
| RAD51C  | MIPOL1                | 1438453_at   | 1432284_at            | 0.8115 |
| NKRF    | MIPOL1                | 1441325_at   | 1432284_at            | 0.8248 |
| TAF1D   | MIPOL1                | 1442289_at   | 1432284_at            | 0.9487 |
| SUPT16H | MIPOL1                | 1449578_at   | 1432284_at            | 0.8089 |
| TCERG1  | MIPOL1                | 1450100_a_at | 1432284_at            | 0.8324 |
| MED1    | MIPOL1                | 1450402_at   | 1432284_at            | 0.9250 |
| MYBL1   | MIPOL1                | 1450481_at   | 1432284_at            | 0.9280 |
| SOX3    | MIPOL1                | 1450485_at   | 1432284_at            | 0.8070 |
| SALL1   | MIPOL1                | 1450489_at   | 1432284_at            | 0.8163 |
| HMGA2   | MIPOL1                | 1450780_s_at | 1432284_at            | 0.9237 |
| HMGA2   | MIPOL1                | 1450781_at   | 1432284_at            | 0.9818 |
| ZNF451  | MIPOL1                | 1451816_at   | 1432284_at            | 0.9543 |
| ZBED3   | MIPOL1                | 1452088_at   | 1432284_at            | 0.9771 |
| MLF1IP  | MIPOL1                | 1452816_at   | 1432284_at            | 0.8918 |
| TTF2    | MIPOL1                | 1452818_at   | 1432284_at            | 0.8694 |
| HELLS   | MIPOL1                | 1453361_at   | 1432284_at            | 0.9094 |
| PHF6    | MIPOL1                | 1453761_at   | 1432284_at            | 0.8577 |
| TAF2    | MIPOL1                | 1457351_at   | 1432284_at            | 0.8383 |
| SUV39H2 | ARMC9                 | 1433996_at   | 1432383_a_at          | 0.8647 |
| PIF1    | ARMC9                 | 1436738_at   | 1432383_a_at          | 0.8163 |
| SOX11   | ARMC9                 | 1436790_a_at | 1432383_a_at          | 0.8908 |
| ASCL1   | ARMC9                 | 1437086_at   | 1432383_a_at          | 0.8432 |
| RAD51C  | ARMC9                 | 1438453_at   | 1432383_a_at          | 0.8647 |
| NKRF    | ARMC9                 | 1441325_at   | 1432383_a_at          | 0.9501 |
| FOXM1   | ARMC9                 | 1448834_at   | 1432383_a_at          | 0.9259 |
| SOX4    | ARMC9                 | 1449370_at   | 1432383_a_at          | 0.8538 |
| SUPT16H | ARMC9                 | 1449578_at   | 1432383_a_at          | 0.9019 |
| TCERG1  | ARMC9                 | 1450100_a_at | 1432383_a_at          | 0.9545 |
| ASCL1   | ARMC9                 | 1450164_at   | 1432383_a_at          | 0.9544 |
| ZFP354C | ARMC9                 | 1450321_at   | 1432383_a_at          | 0.9698 |
| MYBL1   | ARMC9                 | 1450481_at   | 1432383_a_at          | 0.8637 |
| SOX3    | ARMC9                 | 1450485_at   | 1432383_a_at          | 0.9543 |
| HMGA2   | ARMC9                 | 1450780_s_at | 1432383_a_at          | 0.8366 |
| ZNF451  | ARMC9                 | 1451816_at   | 1432383_a_at          | 0.8240 |
| NCOR2   | ARMC9                 | 1451841_a_at | 1432383_a_at          | 0.9813 |
| ZFP2    | ARMC9                 | 1452025_a_at | 1432383_a_at          | 0.9383 |
| CENPF   | ARMC9                 | 1452334_at   | 1432383_a_at          | 0.9317 |
| TTF2    | ARMC9                 | 1452818_at   | 1432383_a_at          | 0.9053 |
| PHF6    | ARMC9                 | 1453761_at   | 1432383_a_at          | 0.9410 |
| TAF2    | ARMC9                 | 1457351_at   | 1432383_a_at          | 0.9486 |
| ZNF69   | ARMC9                 | 1458274_at   | 1432383_a_at          | 0.8838 |
| PIF1    | THG1L                 | 1436738_at   | 1432393_a_at          | 0.8104 |
| TAF1D   | THG1L                 | 1442289_at   | 1432393_a_at          | 0.8667 |
| MED1    | THG1L                 | 1450402_at   | 1432393_a_at          | 0.8765 |
| MYBL1   | THG1L                 | 1450481_at   | 1432393_a_at          | 0.8288 |

|         |               |              |              |        |
|---------|---------------|--------------|--------------|--------|
| HMGA2   | THG1L         | 1450780_s_at | 1432393_a_at | 0.8107 |
| HMGA2   | THG1L         | 1450781_at   | 1432393_a_at | 0.8900 |
| ZNF451  | THG1L         | 1451816_at   | 1432393_a_at | 0.8515 |
| ZBED3   | THG1L         | 1452088_at   | 1432393_a_at | 0.8698 |
| MLF1IP  | THG1L         | 1452816_at   | 1432393_a_at | 0.8337 |
| HELLS   | THG1L         | 1453361_at   | 1432393_a_at | 0.8042 |
| SUV39H2 | 1700106N22RIK | 1433996_at   | 1432504_at   | 0.8503 |
| PIF1    | 1700106N22RIK | 1436738_at   | 1432504_at   | 0.9046 |
| SOX11   | 1700106N22RIK | 1436790_a_at | 1432504_at   | 0.8017 |
| RAD51C  | 1700106N22RIK | 1438453_at   | 1432504_at   | 0.8765 |
| NKRF    | 1700106N22RIK | 1441325_at   | 1432504_at   | 0.8935 |
| TAF1D   | 1700106N22RIK | 1442289_at   | 1432504_at   | 0.8954 |
| FOXM1   | 1700106N22RIK | 1448834_at   | 1432504_at   | 0.8597 |
| SUPT16H | 1700106N22RIK | 1449578_at   | 1432504_at   | 0.8917 |
| TCERG1  | 1700106N22RIK | 1450100_a_at | 1432504_at   | 0.9014 |
| ASCL1   | 1700106N22RIK | 1450164_at   | 1432504_at   | 0.8895 |
| MYBL1   | 1700106N22RIK | 1450481_at   | 1432504_at   | 0.9098 |
| SOX3    | 1700106N22RIK | 1450485_at   | 1432504_at   | 0.9013 |
| SALL1   | 1700106N22RIK | 1450489_at   | 1432504_at   | 0.8222 |
| HMGA2   | 1700106N22RIK | 1450780_s_at | 1432504_at   | 0.9059 |
| HMGA2   | 1700106N22RIK | 1450781_at   | 1432504_at   | 0.8760 |
| ZNF451  | 1700106N22RIK | 1451816_at   | 1432504_at   | 0.9067 |
| NCOR2   | 1700106N22RIK | 1451841_a_at | 1432504_at   | 0.9003 |
| ZFP2    | 1700106N22RIK | 1452025_a_at | 1432504_at   | 0.8844 |
| ZBED3   | 1700106N22RIK | 1452088_at   | 1432504_at   | 0.8619 |
| CENPF   | 1700106N22RIK | 1452334_at   | 1432504_at   | 0.8248 |
| MLF1IP  | 1700106N22RIK | 1452816_at   | 1432504_at   | 0.8737 |
| TTF2    | 1700106N22RIK | 1452818_at   | 1432504_at   | 0.9016 |
| HELLS   | 1700106N22RIK | 1453361_at   | 1432504_at   | 0.8363 |
| PHF6    | 1700106N22RIK | 1453761_at   | 1432504_at   | 0.9475 |
| TAF2    | 1700106N22RIK | 1457351_at   | 1432504_at   | 0.8942 |
| ZNF69   | 1700106N22RIK | 1458274_at   | 1432504_at   | 0.8183 |
| SUV39H2 | TROAP         | 1433996_at   | 1433790_at   | 0.8184 |
| PIF1    | TROAP         | 1436738_at   | 1433790_at   | 0.8346 |
| RAD51C  | TROAP         | 1438453_at   | 1433790_at   | 0.8070 |
| NKRF    | TROAP         | 1441325_at   | 1433790_at   | 0.8304 |
| TAF1D   | TROAP         | 1442289_at   | 1433790_at   | 0.8462 |
| TCERG1  | TROAP         | 1450100_a_at | 1433790_at   | 0.8248 |
| MED1    | TROAP         | 1450402_at   | 1433790_at   | 0.9205 |
| MYBL1   | TROAP         | 1450481_at   | 1433790_at   | 0.8686 |
| HMGA2   | TROAP         | 1450780_s_at | 1433790_at   | 0.8646 |
| HMGA2   | TROAP         | 1450781_at   | 1433790_at   | 0.8217 |
| ZNF451  | TROAP         | 1451816_at   | 1433790_at   | 0.8473 |
| ZBED3   | TROAP         | 1452088_at   | 1433790_at   | 0.8612 |
| MLF1IP  | TROAP         | 1452816_at   | 1433790_at   | 0.8608 |
| TTF2    | TROAP         | 1452818_at   | 1433790_at   | 0.8600 |
| TAF2    | TROAP         | 1457351_at   | 1433790_at   | 0.8364 |
| SUV39H2 | NPHP4         | 1433996_at   | 1434024_at   | 0.8895 |
| SUV39H2 | SRGAP2        | 1433996_at   | 1434407_at   | 0.8603 |
| SUV39H2 | EXOD1         | 1433996_at   | 1435390_at   | 0.8351 |
| SUV39H2 | GEMIN5        | 1433996_at   | 1436311_at   | 0.8643 |

|         |               |            |              |        |
|---------|---------------|------------|--------------|--------|
| SUV39H2 | CD109         | 1433996_at | 1436346_at   | 0.9110 |
| SUV39H2 | CEP78         | 1433996_at | 1436352_at   | 0.9072 |
| SUV39H2 | ZBTB12        | 1433996_at | 1436382_at   | 0.9305 |
| SUV39H2 | PPP1R14B      | 1433996_at | 1436716_at   | 0.8025 |
| SUV39H2 | PIF1          | 1433996_at | 1436738_at   | 0.8965 |
| SUV39H2 | SOX11         | 1433996_at | 1436790_a_at | 0.9010 |
| SUV39H2 | ASCL1         | 1433996_at | 1437086_at   | 0.8189 |
| SUV39H2 | 281040811RIK  | 1433996_at | 1437549_at   | 0.9422 |
| SUV39H2 | AV164956      | 1433996_at | 1437673_at   | 0.8577 |
| SUV39H2 | HEATR1        | 1433996_at | 1437965_at   | 0.8283 |
| SUV39H2 | HEATR5B       | 1433996_at | 1438085_at   | 0.8681 |
| SUV39H2 | 4933432K03RIK | 1433996_at | 1438356_x_at | 0.9373 |
| SUV39H2 | RAD51C        | 1433996_at | 1438453_at   | 0.9275 |
| SUV39H2 | DHX33         | 1433996_at | 1438765_at   | 0.9208 |
| SUV39H2 | AHI1          | 1433996_at | 1439083_at   | 0.8831 |
| SUV39H2 | FANCD2        | 1433996_at | 1439091_at   | 0.9144 |
| SUV39H2 | AI506816      | 1433996_at | 1439483_at   | 0.8832 |
| SUV39H2 | AI746468      | 1433996_at | 1439960_at   | 0.9315 |
| SUV39H2 | ABCC12        | 1433996_at | 1439985_at   | 0.8793 |
| SUV39H2 | A930024E05RIK | 1433996_at | 1440206_at   | 0.9024 |
| SUV39H2 | WDR35         | 1433996_at | 1440318_at   | 0.8115 |
| SUV39H2 | KIF20B        | 1433996_at | 1440924_at   | 0.9451 |
| SUV39H2 | A430071A18RIK | 1433996_at | 1441113_at   | 0.8142 |
| SUV39H2 | MATR3         | 1433996_at | 1441272_at   | 0.9310 |
| SUV39H2 | KBTBD8        | 1433996_at | 1441275_at   | 0.9347 |
| SUV39H2 | NKRF          | 1433996_at | 1441325_at   | 0.9471 |
| SUV39H2 | AU043080      | 1433996_at | 1441375_at   | 0.9213 |
| SUV39H2 | ASPM          | 1433996_at | 1441520_at   | 0.8496 |
| SUV39H2 | D2ERTD750E    | 1433996_at | 1442280_at   | 0.8455 |
| SUV39H2 | TAF1D         | 1433996_at | 1442289_at   | 0.8793 |
| SUV39H2 | NUP188        | 1433996_at | 1442314_at   | 0.8775 |
| SUV39H2 | TTK           | 1433996_at | 1442594_at   | 0.9349 |
| SUV39H2 | AW545941      | 1433996_at | 1443007_at   | 0.8787 |
| SUV39H2 | BB337104      | 1433996_at | 1443026_at   | 0.8261 |
| SUV39H2 | BB444561      | 1433996_at | 1443171_at   | 0.9348 |
| SUV39H2 | BM202761      | 1433996_at | 1443800_at   | 0.8728 |
| SUV39H2 | ZBTB39        | 1433996_at | 1443880_at   | 0.8642 |
| SUV39H2 | CDK5RAP2      | 1433996_at | 1443976_at   | 0.8117 |
| SUV39H2 | ERCC6L        | 1433996_at | 1444024_at   | 0.9346 |
| SUV39H2 | AV228095      | 1433996_at | 1444443_at   | 0.9413 |
| SUV39H2 | 6530418L21RIK | 1433996_at | 1444723_at   | 0.8313 |
| SUV39H2 | MASTL         | 1433996_at | 1444725_at   | 0.9218 |
| SUV39H2 | BC023969      | 1433996_at | 1445226_at   | 0.9019 |
| SUV39H2 | C530044C16RIK | 1433996_at | 1445247_at   | 0.8466 |
| SUV39H2 | AV323315      | 1433996_at | 1445298_at   | 0.8987 |
| SUV39H2 | 9330118A15RIK | 1433996_at | 1446612_at   | 0.8144 |
| SUV39H2 | KCND3         | 1433996_at | 1447513_at   | 0.9134 |
| SUV39H2 | SEMA6D        | 1433996_at | 1448060_at   | 0.8230 |
| SUV39H2 | OGG1          | 1433996_at | 1448815_at   | 0.9209 |
| SUV39H2 | FOXM1         | 1433996_at | 1448834_at   | 0.9002 |
| SUV39H2 | SKP2          | 1433996_at | 1449293_a_at | 0.9374 |

|         |                     |              |                     |        |
|---------|---------------------|--------------|---------------------|--------|
| SUV39H2 | SOX4                | 1433996_at   | 1449370_at          | 0.8407 |
| SUV39H2 | SUPT16H             | 1433996_at   | 1449578_at          | 0.9520 |
| SUV39H2 | CCNB1               | 1433996_at   | 1449675_at          | 0.9369 |
| SUV39H2 | APC                 | 1433996_at   | 1450056_at          | 0.8062 |
| SUV39H2 | 4933411K20RIK       | 1433996_at   | 1450076_at          | 0.9350 |
| SUV39H2 | TCERG1              | 1433996_at   | 1450100_a_at        | 0.9433 |
| SUV39H2 | ASCL1               | 1433996_at   | 1450164_at          | 0.8865 |
| SUV39H2 | ZFP354C             | 1433996_at   | 1450321_at          | 0.8264 |
| SUV39H2 | MED1                | 1433996_at   | 1450402_at          | 0.8648 |
| SUV39H2 | MYBL1               | 1433996_at   | 1450481_at          | 0.9414 |
| SUV39H2 | SOX3                | 1433996_at   | 1450485_at          | 0.9125 |
| SUV39H2 | HMGA2               | 1433996_at   | 1450780_s_at        | 0.9232 |
| SUV39H2 | HMGA2               | 1433996_at   | 1450781_at          | 0.8314 |
| SUV39H2 | ZNF451              | 1433996_at   | 1451816_at          | 0.9185 |
| SUV39H2 | NCOR2               | 1433996_at   | 1451841_a_at        | 0.8355 |
| SUV39H2 | LMNB2               | 1433996_at   | 1451849_a_at        | 0.8445 |
| SUV39H2 | ZFP2                | 1433996_at   | 1452025_a_at        | 0.8564 |
| SUV39H2 | 6720460F02RIK       | 1433996_at   | 1452073_at          | 0.8982 |
| SUV39H2 | ZBED3               | 1433996_at   | 1452088_at          | 0.8957 |
| SUV39H2 | RRP1B               | 1433996_at   | 1452119_at          | 0.8694 |
| SUV39H2 | NOVA1               | 1433996_at   | 1452245_at          | 0.8080 |
| SUV39H2 | CENPF               | 1433996_at   | 1452334_at          | 0.8436 |
| SUV39H2 | ASPM                | 1433996_at   | 1452459_at          | 0.9134 |
| SUV39H2 | MLF1IP              | 1433996_at   | 1452816_at          | 0.9265 |
| SUV39H2 | TTF2                | 1433996_at   | 1452818_at          | 0.8899 |
| SUV39H2 | TMEM138             | 1433996_at   | 1452978_at          | 0.8967 |
| SUV39H2 | RHOBTB3             | 1433996_at   | 1453227_at          | 0.9056 |
| SUV39H2 | HELLS               | 1433996_at   | 1453361_at          | 0.8514 |
| SUV39H2 | TROAP               | 1433996_at   | 1453370_at          | 0.9451 |
| SUV39H2 | CEP55               | 1433996_at   | 1453683_a_at        | 0.9401 |
| SUV39H2 | DHX38               | 1433996_at   | 1453751_at          | 0.9154 |
| SUV39H2 | PHF6                | 1433996_at   | 1453761_at          | 0.9346 |
| SUV39H2 | NETO2               | 1433996_at   | 1454032_at          | 0.8939 |
| SUV39H2 | CCDC77              | 1433996_at   | 1454228_a_at        | 0.9051 |
| SUV39H2 | EXOD1               | 1433996_at   | 1454229_a_at        | 0.9322 |
| SUV39H2 | UTP23               | 1433996_at   | 1455259_a_at        | 0.9426 |
| SUV39H2 | 2700049P18RIK       | 1433996_at   | 1456163_at          | 0.8932 |
| SUV39H2 | RTEL1               | 1433996_at   | 1456729_x_at        | 0.8984 |
| SUV39H2 | BB053540            | 1433996_at   | 1456840_at          | 0.8097 |
| SUV39H2 | AV254764            | 1433996_at   | 1456951_at          | 0.8911 |
| SUV39H2 | NETO2               | 1433996_at   | 1457344_at          | 0.8281 |
| SUV39H2 | TAF2                | 1433996_at   | 1457351_at          | 0.9431 |
| SUV39H2 | ZNF69               | 1433996_at   | 1458274_at          | 0.8452 |
| SUV39H2 | MTR                 | 1433996_at   | 1458532_at          | 0.8956 |
| SUV39H2 | RNF219              | 1433996_at   | 1458636_at          | 0.9297 |
| SUV39H2 | BB463474            | 1433996_at   | 1458902_at          | 0.8861 |
| SUV39H2 | AA763515            | 1433996_at   | 1460065_at          | 0.8108 |
| SUV39H2 | AFFX-DapX-5_at      | 1433996_at   | AFFX-DapX-5_at      | 0.8001 |
| SUV39H2 | AFFX-r2-Bs-lys-5_at | 1433996_at   | AFFX-r2-Bs-lys-5_at | 0.8003 |
| PIF1    | NPHP4               | 1436738_at   | 1434024_at          | 0.8329 |
| SOX11   | NPHP4               | 1436790_a_at | 1434024_at          | 0.9144 |

|         |               |              |              |        |
|---------|---------------|--------------|--------------|--------|
| ASCL1   | NPHP4         | 1437086_at   | 1434024_at   | 0.8295 |
| RAD51C  | NPHP4         | 1438453_at   | 1434024_at   | 0.8697 |
| NKRF    | NPHP4         | 1441325_at   | 1434024_at   | 0.9391 |
| FOXM1   | NPHP4         | 1448834_at   | 1434024_at   | 0.9207 |
| SOX4    | NPHP4         | 1449370_at   | 1434024_at   | 0.8280 |
| SUPT16H | NPHP4         | 1449578_at   | 1434024_at   | 0.8843 |
| TCERG1  | NPHP4         | 1450100_a_at | 1434024_at   | 0.9282 |
| ASCL1   | NPHP4         | 1450164_at   | 1434024_at   | 0.9367 |
| ZFP354C | NPHP4         | 1450321_at   | 1434024_at   | 0.9284 |
| MYBL1   | NPHP4         | 1450481_at   | 1434024_at   | 0.8579 |
| SOX3    | NPHP4         | 1450485_at   | 1434024_at   | 0.9356 |
| HMGA2   | NPHP4         | 1450780_s_at | 1434024_at   | 0.8504 |
| ZNF451  | NPHP4         | 1451816_at   | 1434024_at   | 0.8314 |
| NCOR2   | NPHP4         | 1451841_a_at | 1434024_at   | 0.9414 |
| ZFP2    | NPHP4         | 1452025_a_at | 1434024_at   | 0.8847 |
| CENPF   | NPHP4         | 1452334_at   | 1434024_at   | 0.9072 |
| MLF1IP  | NPHP4         | 1452816_at   | 1434024_at   | 0.8262 |
| TTF2    | NPHP4         | 1452818_at   | 1434024_at   | 0.8914 |
| PHF6    | NPHP4         | 1453761_at   | 1434024_at   | 0.9223 |
| TAF2    | NPHP4         | 1457351_at   | 1434024_at   | 0.9279 |
| ZNF69   | NPHP4         | 1458274_at   | 1434024_at   | 0.8578 |
| SOX11   | SRGAP2        | 1436790_a_at | 1434407_at   | 0.8633 |
| RAD51C  | SRGAP2        | 1438453_at   | 1434407_at   | 0.8650 |
| NKRF    | SRGAP2        | 1441325_at   | 1434407_at   | 0.9019 |
| FOXM1   | SRGAP2        | 1448834_at   | 1434407_at   | 0.8246 |
| SOX4    | SRGAP2        | 1449370_at   | 1434407_at   | 0.8305 |
| SUPT16H | SRGAP2        | 1449578_at   | 1434407_at   | 0.9246 |
| TCERG1  | SRGAP2        | 1450100_a_at | 1434407_at   | 0.9164 |
| ASCL1   | SRGAP2        | 1450164_at   | 1434407_at   | 0.8600 |
| ZFP354C | SRGAP2        | 1450321_at   | 1434407_at   | 0.8659 |
| MYBL1   | SRGAP2        | 1450481_at   | 1434407_at   | 0.8435 |
| SOX3    | SRGAP2        | 1450485_at   | 1434407_at   | 0.8941 |
| HMGA2   | SRGAP2        | 1450780_s_at | 1434407_at   | 0.8005 |
| ZNF451  | SRGAP2        | 1451816_at   | 1434407_at   | 0.8285 |
| NCOR2   | SRGAP2        | 1451841_a_at | 1434407_at   | 0.8811 |
| ZFP2    | SRGAP2        | 1452025_a_at | 1434407_at   | 0.8741 |
| CENPF   | SRGAP2        | 1452334_at   | 1434407_at   | 0.8436 |
| MLF1IP  | SRGAP2        | 1452816_at   | 1434407_at   | 0.8004 |
| TTF2    | SRGAP2        | 1452818_at   | 1434407_at   | 0.8244 |
| PHF6    | SRGAP2        | 1453761_at   | 1434407_at   | 0.8940 |
| TAF2    | SRGAP2        | 1457351_at   | 1434407_at   | 0.8977 |
| ZNF69   | SRGAP2        | 1458274_at   | 1434407_at   | 0.8282 |
| SOX3    | EXOD1         | 1435192_at   | 1435390_at   | 0.8420 |
| SOX3    | CEP78         | 1435192_at   | 1436352_at   | 0.8347 |
| SOX3    | SDC3          | 1435192_at   | 1436482_a_at | 0.8118 |
| SOX3    | PIF1          | 1435192_at   | 1436738_at   | 0.8066 |
| SOX3    | ASCL1         | 1435192_at   | 1437086_at   | 0.9334 |
| SOX3    | ABCC12        | 1435192_at   | 1439985_at   | 0.8118 |
| SOX3    | A930024E05RIK | 1435192_at   | 1440206_at   | 0.8426 |
| SOX3    | D2ERTD750E    | 1435192_at   | 1442280_at   | 0.9282 |
| SOX3    | AW545941      | 1435192_at   | 1443007_at   | 0.8100 |

|         |               |              |            |        |
|---------|---------------|--------------|------------|--------|
| SOX3    | 6530418L21RIK | 1435192_at   | 1444723_at | 0.8045 |
| SOX3    | AV323315      | 1435192_at   | 1445298_at | 0.8787 |
| SOX3    | SEMA6D        | 1435192_at   | 1448060_at | 0.8252 |
| SOX3    | FOXM1         | 1435192_at   | 1448834_at | 0.8650 |
| SOX3    | ASCL1         | 1435192_at   | 1450164_at | 0.8509 |
| SOX3    | 6720460F02RIK | 1435192_at   | 1452073_at | 0.9068 |
| SOX3    | NOVA1         | 1435192_at   | 1452245_at | 0.8557 |
| SOX3    | 4930427A07RIK | 1435192_at   | 1452337_at | 0.8476 |
| SOX3    | ASPM          | 1435192_at   | 1452459_at | 0.8282 |
| SOX3    | BB053540      | 1435192_at   | 1456840_at | 0.8477 |
| SOX3    | AV254764      | 1435192_at   | 1456951_at | 0.8495 |
| PIF1    | EXOD1         | 1436738_at   | 1435390_at | 0.8714 |
| ASCL1   | EXOD1         | 1437086_at   | 1435390_at | 0.8824 |
| RAD51C  | EXOD1         | 1438453_at   | 1435390_at | 0.8911 |
| NKRF    | EXOD1         | 1441325_at   | 1435390_at | 0.8658 |
| TAF1D   | EXOD1         | 1442289_at   | 1435390_at | 0.8048 |
| FOXM1   | EXOD1         | 1448834_at   | 1435390_at | 0.8575 |
| SUPT16H | EXOD1         | 1449578_at   | 1435390_at | 0.8258 |
| TCERG1  | EXOD1         | 1450100_a_at | 1435390_at | 0.8654 |
| ASCL1   | EXOD1         | 1450164_at   | 1435390_at | 0.9036 |
| MYBL1   | EXOD1         | 1450481_at   | 1435390_at | 0.8514 |
| SOX3    | EXOD1         | 1450485_at   | 1435390_at | 0.8459 |
| HMGA2   | EXOD1         | 1450780_s_at | 1435390_at | 0.8951 |
| ZNF451  | EXOD1         | 1451816_at   | 1435390_at | 0.8260 |
| NCOR2   | EXOD1         | 1451841_a_at | 1435390_at | 0.8189 |
| ZFP2    | EXOD1         | 1452025_a_at | 1435390_at | 0.8528 |
| CENPF   | EXOD1         | 1452334_at   | 1435390_at | 0.8134 |
| MLF1IP  | EXOD1         | 1452816_at   | 1435390_at | 0.8176 |
| TTF2    | EXOD1         | 1452818_at   | 1435390_at | 0.8631 |
| PHF6    | EXOD1         | 1453761_at   | 1435390_at | 0.8723 |
| TAF2    | EXOD1         | 1457351_at   | 1435390_at | 0.8745 |
| ZNF69   | EXOD1         | 1458274_at   | 1435390_at | 0.8042 |
| SOX11   | MEX3A         | 1436790_a_at | 1436018_at | 0.8306 |
| PIF1    | GEMIN5        | 1436738_at   | 1436311_at | 0.8461 |
| RAD51C  | GEMIN5        | 1438453_at   | 1436311_at | 0.8025 |
| NKRF    | GEMIN5        | 1441325_at   | 1436311_at | 0.8434 |
| TAF1D   | GEMIN5        | 1442289_at   | 1436311_at | 0.8875 |
| SUPT16H | GEMIN5        | 1449578_at   | 1436311_at | 0.8108 |
| TCERG1  | GEMIN5        | 1450100_a_at | 1436311_at | 0.8362 |
| MED1    | GEMIN5        | 1450402_at   | 1436311_at | 0.9017 |
| MYBL1   | GEMIN5        | 1450481_at   | 1436311_at | 0.9107 |
| HMGA2   | GEMIN5        | 1450780_s_at | 1436311_at | 0.8664 |
| HMGA2   | GEMIN5        | 1450781_at   | 1436311_at | 0.8521 |
| ZNF451  | GEMIN5        | 1451816_at   | 1436311_at | 0.9025 |
| ZBED3   | GEMIN5        | 1452088_at   | 1436311_at | 0.8904 |
| MLF1IP  | GEMIN5        | 1452816_at   | 1436311_at | 0.9016 |
| TTF2    | GEMIN5        | 1452818_at   | 1436311_at | 0.8324 |
| HELLS   | GEMIN5        | 1453361_at   | 1436311_at | 0.8732 |
| PHF6    | GEMIN5        | 1453761_at   | 1436311_at | 0.8234 |
| TAF2    | GEMIN5        | 1457351_at   | 1436311_at | 0.8511 |
| ZNF69   | GEMIN5        | 1458274_at   | 1436311_at | 0.8084 |

|         |       |              |            |        |
|---------|-------|--------------|------------|--------|
| PIF1    | CD109 | 1436738_at   | 1436346_at | 0.9076 |
| SOX11   | CD109 | 1436790_a_at | 1436346_at | 0.8562 |
| ASCL1   | CD109 | 1437086_at   | 1436346_at | 0.8420 |
| RAD51C  | CD109 | 1438453_at   | 1436346_at | 0.8897 |
| NKRF    | CD109 | 1441325_at   | 1436346_at | 0.9690 |
| TAF1D   | CD109 | 1442289_at   | 1436346_at | 0.8995 |
| FOXM1   | CD109 | 1448834_at   | 1436346_at | 0.9321 |
| SOX4    | CD109 | 1449370_at   | 1436346_at | 0.8057 |
| SUPT16H | CD109 | 1449578_at   | 1436346_at | 0.9380 |
| TCERG1  | CD109 | 1450100_a_at | 1436346_at | 0.9665 |
| ASCL1   | CD109 | 1450164_at   | 1436346_at | 0.9292 |
| NPAS3   | CD109 | 1450287_at   | 1436346_at | 0.8069 |
| ZFP354C | CD109 | 1450321_at   | 1436346_at | 0.8801 |
| MED1    | CD109 | 1450402_at   | 1436346_at | 0.8215 |
| MYBL1   | CD109 | 1450481_at   | 1436346_at | 0.9439 |
| SOX3    | CD109 | 1450485_at   | 1436346_at | 0.9606 |
| SALL1   | CD109 | 1450489_at   | 1436346_at | 0.8428 |
| HMGA2   | CD109 | 1450780_s_at | 1436346_at | 0.9182 |
| HMGA2   | CD109 | 1450781_at   | 1436346_at | 0.8671 |
| ZNF451  | CD109 | 1451816_at   | 1436346_at | 0.9391 |
| NCOR2   | CD109 | 1451841_a_at | 1436346_at | 0.9350 |
| ZFP2    | CD109 | 1452025_a_at | 1436346_at | 0.9057 |
| ZBED3   | CD109 | 1452088_at   | 1436346_at | 0.9045 |
| CENPF   | CD109 | 1452334_at   | 1436346_at | 0.8751 |
| MLF1IP  | CD109 | 1452816_at   | 1436346_at | 0.8998 |
| TTF2    | CD109 | 1452818_at   | 1436346_at | 0.9582 |
| HELLS   | CD109 | 1453361_at   | 1436346_at | 0.8613 |
| PHF6    | CD109 | 1453761_at   | 1436346_at | 0.9838 |
| TAF2    | CD109 | 1457351_at   | 1436346_at | 0.9674 |
| ZNF69   | CD109 | 1458274_at   | 1436346_at | 0.8685 |
| PIF1    | CEP78 | 1436738_at   | 1436352_at | 0.8838 |
| SOX11   | CEP78 | 1436790_a_at | 1436352_at | 0.8764 |
| ASCL1   | CEP78 | 1437086_at   | 1436352_at | 0.8455 |
| RAD51C  | CEP78 | 1438453_at   | 1436352_at | 0.8620 |
| NKRF    | CEP78 | 1441325_at   | 1436352_at | 0.8732 |
| TAF1D   | CEP78 | 1442289_at   | 1436352_at | 0.8195 |
| FOXM1   | CEP78 | 1448834_at   | 1436352_at | 0.8863 |
| SOX4    | CEP78 | 1449370_at   | 1436352_at | 0.8202 |
| SUPT16H | CEP78 | 1449578_at   | 1436352_at | 0.8791 |
| TCERG1  | CEP78 | 1450100_a_at | 1436352_at | 0.8756 |
| ASCL1   | CEP78 | 1450164_at   | 1436352_at | 0.8584 |
| MYBL1   | CEP78 | 1450481_at   | 1436352_at | 0.8678 |
| SOX3    | CEP78 | 1450485_at   | 1436352_at | 0.8454 |
| HMGA2   | CEP78 | 1450780_s_at | 1436352_at | 0.8748 |
| ZNF451  | CEP78 | 1451816_at   | 1436352_at | 0.8521 |
| NCOR2   | CEP78 | 1451841_a_at | 1436352_at | 0.8038 |
| ZBED3   | CEP78 | 1452088_at   | 1436352_at | 0.8238 |
| MLF1IP  | CEP78 | 1452816_at   | 1436352_at | 0.8567 |
| TTF2    | CEP78 | 1452818_at   | 1436352_at | 0.8592 |
| PHF6    | CEP78 | 1453761_at   | 1436352_at | 0.8754 |
| TAF2    | CEP78 | 1457351_at   | 1436352_at | 0.8786 |

|         |          |              |              |        |
|---------|----------|--------------|--------------|--------|
| PIF1    | ZBTB12   | 1436738_at   | 1436382_at   | 0.9578 |
| SOX11   | ZBTB12   | 1436790_a_at | 1436382_at   | 0.8055 |
| RAD51C  | ZBTB12   | 1438453_at   | 1436382_at   | 0.9097 |
| NKRF    | ZBTB12   | 1441325_at   | 1436382_at   | 0.9527 |
| TAF1D   | ZBTB12   | 1442289_at   | 1436382_at   | 0.9717 |
| FOXM1   | ZBTB12   | 1448834_at   | 1436382_at   | 0.8724 |
| SUPT16H | ZBTB12   | 1449578_at   | 1436382_at   | 0.9215 |
| TCERG1  | ZBTB12   | 1450100_a_at | 1436382_at   | 0.9521 |
| ASCL1   | ZBTB12   | 1450164_at   | 1436382_at   | 0.8730 |
| MED1    | ZBTB12   | 1450402_at   | 1436382_at   | 0.9274 |
| MYBL1   | ZBTB12   | 1450481_at   | 1436382_at   | 0.9845 |
| SOX3    | ZBTB12   | 1450485_at   | 1436382_at   | 0.9304 |
| SALL1   | ZBTB12   | 1450489_at   | 1436382_at   | 0.8658 |
| HMGA2   | ZBTB12   | 1450780_s_at | 1436382_at   | 0.9728 |
| HMGA2   | ZBTB12   | 1450781_at   | 1436382_at   | 0.9520 |
| ZNF451  | ZBTB12   | 1451816_at   | 1436382_at   | 0.9932 |
| NCOR2   | ZBTB12   | 1451841_a_at | 1436382_at   | 0.8368 |
| ZFP2    | ZBTB12   | 1452025_a_at | 1436382_at   | 0.8543 |
| ZBED3   | ZBTB12   | 1452088_at   | 1436382_at   | 0.9796 |
| MLF1IP  | ZBTB12   | 1452816_at   | 1436382_at   | 0.9571 |
| TTF2    | ZBTB12   | 1452818_at   | 1436382_at   | 0.9545 |
| HELLS   | ZBTB12   | 1453361_at   | 1436382_at   | 0.9358 |
| PHF6    | ZBTB12   | 1453761_at   | 1436382_at   | 0.9661 |
| TAF2    | ZBTB12   | 1457351_at   | 1436382_at   | 0.9556 |
| ZNF69   | ZBTB12   | 1458274_at   | 1436382_at   | 0.8662 |
| SOX11   | SDC3     | 1436790_a_at | 1436482_a_at | 0.8935 |
| ASCL1   | SDC3     | 1437086_at   | 1436482_a_at | 0.8662 |
| RAD51C  | SDC3     | 1438453_at   | 1436482_a_at | 0.8077 |
| NKRF    | SDC3     | 1441325_at   | 1436482_a_at | 0.8038 |
| FOXM1   | SDC3     | 1448834_at   | 1436482_a_at | 0.8444 |
| SOX4    | SDC3     | 1449370_at   | 1436482_a_at | 0.9058 |
| SUPT16H | SDC3     | 1449578_at   | 1436482_a_at | 0.8077 |
| TCERG1  | SDC3     | 1450100_a_at | 1436482_a_at | 0.8041 |
| ASCL1   | SDC3     | 1450164_at   | 1436482_a_at | 0.9121 |
| ZFP354C | SDC3     | 1450321_at   | 1436482_a_at | 0.8806 |
| SOX3    | SDC3     | 1450485_at   | 1436482_a_at | 0.8207 |
| NCOR2   | SDC3     | 1451841_a_at | 1436482_a_at | 0.8919 |
| ZFP2    | SDC3     | 1452025_a_at | 1436482_a_at | 0.8307 |
| CENPF   | SDC3     | 1452334_at   | 1436482_a_at | 0.8393 |
| PIF1    | PPP1R14B | 1436738_at   | 1436716_at   | 0.9015 |
| RAD51C  | PPP1R14B | 1438453_at   | 1436716_at   | 0.8187 |
| TAF1D   | PPP1R14B | 1442289_at   | 1436716_at   | 0.9454 |
| TCERG1  | PPP1R14B | 1450100_a_at | 1436716_at   | 0.8027 |
| MED1    | PPP1R14B | 1450402_at   | 1436716_at   | 0.8796 |
| MYBL1   | PPP1R14B | 1450481_at   | 1436716_at   | 0.9120 |
| HMGA2   | PPP1R14B | 1450780_s_at | 1436716_at   | 0.9049 |
| HMGA2   | PPP1R14B | 1450781_at   | 1436716_at   | 0.9374 |
| ZNF451  | PPP1R14B | 1451816_at   | 1436716_at   | 0.9294 |
| ZBED3   | PPP1R14B | 1452088_at   | 1436716_at   | 0.9151 |
| MLF1IP  | PPP1R14B | 1452816_at   | 1436716_at   | 0.8965 |
| TTF2    | PPP1R14B | 1452818_at   | 1436716_at   | 0.8319 |



|       |               |            |              |        |
|-------|---------------|------------|--------------|--------|
| HELLS | PPP1R14B      | 1453361_at | 1436716_at   | 0.8595 |
| PHF6  | PPP1R14B      | 1453761_at | 1436716_at   | 0.8628 |
| TAF2  | PPP1R14B      | 1457351_at | 1436716_at   | 0.8055 |
| PIF1  | 4922501L14RIK | 1436738_at | 1436969_at   | 0.9149 |
| PIF1  | ASCL1         | 1436738_at | 1437086_at   | 0.8430 |
| PIF1  | 2810408I11RIK | 1436738_at | 1437549_at   | 0.9485 |
| PIF1  | PIGT          | 1436738_at | 1437594_x_at | 0.8773 |
| PIF1  | AV164956      | 1436738_at | 1437673_at   | 0.8506 |
| PIF1  | 4933432K03RIK | 1436738_at | 1438356_x_at | 0.9102 |
| PIF1  | RAD51C        | 1436738_at | 1438453_at   | 0.9318 |
| PIF1  | DHX33         | 1436738_at | 1438765_at   | 0.8882 |
| PIF1  | AH11          | 1436738_at | 1439083_at   | 0.8260 |
| PIF1  | FANCD2        | 1436738_at | 1439091_at   | 0.8937 |
| PIF1  | AI506816      | 1436738_at | 1439483_at   | 0.8201 |
| PIF1  | AI746468      | 1436738_at | 1439960_at   | 0.9151 |
| PIF1  | ABCC12        | 1436738_at | 1439985_at   | 0.8444 |
| PIF1  | A930024E05RIK | 1436738_at | 1440206_at   | 0.8785 |
| PIF1  | SPRY4         | 1436738_at | 1440867_at   | 0.8363 |
| PIF1  | KIF20B        | 1436738_at | 1440924_at   | 0.9070 |
| PIF1  | A430071A18RIK | 1436738_at | 1441113_at   | 0.9246 |
| PIF1  | MATR3         | 1436738_at | 1441272_at   | 0.9420 |
| PIF1  | KBTBD8        | 1436738_at | 1441275_at   | 0.9364 |
| PIF1  | NKRF          | 1436738_at | 1441325_at   | 0.9072 |
| PIF1  | AU043080      | 1436738_at | 1441375_at   | 0.8433 |
| PIF1  | CCDC38        | 1436738_at | 1441965_at   | 0.8017 |
| PIF1  | D2ERTD750E    | 1436738_at | 1442280_at   | 0.8757 |
| PIF1  | TAF1D         | 1436738_at | 1442289_at   | 0.9349 |
| PIF1  | TTK           | 1436738_at | 1442594_at   | 0.8905 |
| PIF1  | AW545941      | 1436738_at | 1443007_at   | 0.8946 |
| PIF1  | BB444561      | 1436738_at | 1443171_at   | 0.9359 |
| PIF1  | BM202761      | 1436738_at | 1443800_at   | 0.9507 |
| PIF1  | ZBTB39        | 1436738_at | 1443880_at   | 0.8526 |
| PIF1  | ERCC6L        | 1436738_at | 1444024_at   | 0.8978 |
| PIF1  | AV228095      | 1436738_at | 1444443_at   | 0.9500 |
| PIF1  | MASTL         | 1436738_at | 1444725_at   | 0.9157 |
| PIF1  | BC023969      | 1436738_at | 1445226_at   | 0.8411 |
| PIF1  | C530044C16RIK | 1436738_at | 1445247_at   | 0.8854 |
| PIF1  | AV323315      | 1436738_at | 1445298_at   | 0.9093 |
| PIF1  | 9330118A15RIK | 1436738_at | 1446612_at   | 0.8687 |
| PIF1  | KCND3         | 1436738_at | 1447513_at   | 0.8798 |
| PIF1  | SEMA6D        | 1436738_at | 1448060_at   | 0.8019 |
| PIF1  | OGG1          | 1436738_at | 1448815_at   | 0.9298 |
| PIF1  | FOXM1         | 1436738_at | 1448834_at   | 0.8648 |
| PIF1  | SKP2          | 1436738_at | 1449293_a_at | 0.9105 |
| PIF1  | SUPT16H       | 1436738_at | 1449578_at   | 0.8866 |
| PIF1  | CCNB1         | 1436738_at | 1449675_at   | 0.9070 |
| PIF1  | 4933411K20RIK | 1436738_at | 1450076_at   | 0.9069 |
| PIF1  | TCERG1        | 1436738_at | 1450100_a_at | 0.9005 |
| PIF1  | ASCL1         | 1436738_at | 1450164_at   | 0.8882 |
| PIF1  | MED1          | 1436738_at | 1450402_at   | 0.8819 |
| PIF1  | MYBL1         | 1436738_at | 1450481_at   | 0.9455 |

|       |               |              |              |        |
|-------|---------------|--------------|--------------|--------|
| PIF1  | SOX3          | 1436738_at   | 1450485_at   | 0.8925 |
| PIF1  | SALL1         | 1436738_at   | 1450489_at   | 0.8261 |
| PIF1  | HMGA2         | 1436738_at   | 1450780_s_at | 0.9846 |
| PIF1  | HMGA2         | 1436738_at   | 1450781_at   | 0.9286 |
| PIF1  | ZNF451        | 1436738_at   | 1451816_at   | 0.9564 |
| PIF1  | NCOR2         | 1436738_at   | 1451841_a_at | 0.8073 |
| PIF1  | LMNB2         | 1436738_at   | 1451849_a_at | 0.9060 |
| PIF1  | ZFP2          | 1436738_at   | 1452025_a_at | 0.8329 |
| PIF1  | 6720460F02RIK | 1436738_at   | 1452073_at   | 0.8862 |
| PIF1  | ZBED3         | 1436738_at   | 1452088_at   | 0.9445 |
| PIF1  | RRP1B         | 1436738_at   | 1452119_at   | 0.8833 |
| PIF1  | NOVA1         | 1436738_at   | 1452245_at   | 0.8347 |
| PIF1  | ASPM          | 1436738_at   | 1452459_at   | 0.8713 |
| PIF1  | MLF1IP        | 1436738_at   | 1452816_at   | 0.9295 |
| PIF1  | TTF2          | 1436738_at   | 1452818_at   | 0.9270 |
| PIF1  | TMEM138       | 1436738_at   | 1452978_at   | 0.8793 |
| PIF1  | RHOBTB3       | 1436738_at   | 1453227_at   | 0.8605 |
| PIF1  | HELLS         | 1436738_at   | 1453361_at   | 0.8936 |
| PIF1  | TROAP         | 1436738_at   | 1453370_at   | 0.9291 |
| PIF1  | CEP55         | 1436738_at   | 1453683_a_at | 0.9384 |
| PIF1  | DHX38         | 1436738_at   | 1453751_at   | 0.8283 |
| PIF1  | PHF6          | 1436738_at   | 1453761_at   | 0.9292 |
| PIF1  | FAM110A       | 1436738_at   | 1453768_a_at | 0.8144 |
| PIF1  | NETO2         | 1436738_at   | 1454032_at   | 0.8362 |
| PIF1  | CCDC77        | 1436738_at   | 1454228_a_at | 0.9393 |
| PIF1  | EXOD1         | 1436738_at   | 1454229_a_at | 0.8980 |
| PIF1  | UTP23         | 1436738_at   | 1455259_a_at | 0.9126 |
| PIF1  | IER5L         | 1436738_at   | 1455881_at   | 0.8237 |
| PIF1  | 2700049P18RIK | 1436738_at   | 1456163_at   | 0.8993 |
| PIF1  | RTEL1         | 1436738_at   | 1456729_x_at | 0.8532 |
| PIF1  | BB053540      | 1436738_at   | 1456840_at   | 0.8018 |
| PIF1  | AV254764      | 1436738_at   | 1456951_at   | 0.9672 |
| PIF1  | TAF2          | 1436738_at   | 1457351_at   | 0.9085 |
| PIF1  | ETAA1         | 1436738_at   | 1457882_at   | 0.8579 |
| PIF1  | ZNF69         | 1436738_at   | 1458274_at   | 0.8157 |
| PIF1  | MTR           | 1436738_at   | 1458532_at   | 0.8820 |
| PIF1  | RNF219        | 1436738_at   | 1458636_at   | 0.9148 |
| PIF1  | BB463474      | 1436738_at   | 1458902_at   | 0.9587 |
| PIF1  | AA763515      | 1436738_at   | 1460065_at   | 0.9185 |
| SOX11 | ASCL1         | 1436790_a_at | 1437086_at   | 0.8255 |
| SOX11 | 2810408I11RIK | 1436790_a_at | 1437549_at   | 0.8365 |
| SOX11 | AV164956      | 1436790_a_at | 1437673_at   | 0.8511 |
| SOX11 | HEATR5B       | 1436790_a_at | 1438085_at   | 0.8628 |
| SOX11 | 4933432K03RIK | 1436790_a_at | 1438356_x_at | 0.8609 |
| SOX11 | RAD51C        | 1436790_a_at | 1438453_at   | 0.8906 |
| SOX11 | DHX33         | 1436790_a_at | 1438765_at   | 0.8769 |
| SOX11 | AH11          | 1436790_a_at | 1439083_at   | 0.8589 |
| SOX11 | FANCD2        | 1436790_a_at | 1439091_at   | 0.8736 |
| SOX11 | AI506816      | 1436790_a_at | 1439483_at   | 0.9092 |
| SOX11 | AI746468      | 1436790_a_at | 1439960_at   | 0.8460 |
| SOX11 | A930024E05RIK | 1436790_a_at | 1440206_at   | 0.8788 |

|       |               |              |              |        |
|-------|---------------|--------------|--------------|--------|
| SOX11 | WDR35         | 1436790_a_at | 1440318_at   | 0.8680 |
| SOX11 | KIF20B        | 1436790_a_at | 1440924_at   | 0.8178 |
| SOX11 | KBTBD8        | 1436790_a_at | 1441275_at   | 0.8543 |
| SOX11 | NKRF          | 1436790_a_at | 1441325_at   | 0.8786 |
| SOX11 | AU043080      | 1436790_a_at | 1441375_at   | 0.8679 |
| SOX11 | ASPM          | 1436790_a_at | 1441520_at   | 0.8733 |
| SOX11 | D2ERTD750E    | 1436790_a_at | 1442280_at   | 0.8476 |
| SOX11 | TTK           | 1436790_a_at | 1442594_at   | 0.8964 |
| SOX11 | DGKK          | 1436790_a_at | 1442865_at   | 0.8083 |
| SOX11 | BB337104      | 1436790_a_at | 1443026_at   | 0.8313 |
| SOX11 | BB444561      | 1436790_a_at | 1443171_at   | 0.8985 |
| SOX11 | BB340127      | 1436790_a_at | 1443230_at   | 0.8140 |
| SOX11 | BB130444      | 1436790_a_at | 1443410_at   | 0.8879 |
| SOX11 | ZBTB39        | 1436790_a_at | 1443880_at   | 0.8127 |
| SOX11 | ERCC6L        | 1436790_a_at | 1444024_at   | 0.8924 |
| SOX11 | AV228095      | 1436790_a_at | 1444443_at   | 0.8739 |
| SOX11 | 6530418L21RIK | 1436790_a_at | 1444723_at   | 0.9032 |
| SOX11 | MASTL         | 1436790_a_at | 1444725_at   | 0.8391 |
| SOX11 | BC023969      | 1436790_a_at | 1445226_at   | 0.9172 |
| SOX11 | AV323315      | 1436790_a_at | 1445298_at   | 0.8779 |
| SOX11 | KCND3         | 1436790_a_at | 1447513_at   | 0.8950 |
| SOX11 | OGG1          | 1436790_a_at | 1448815_at   | 0.8156 |
| SOX11 | FOX1          | 1436790_a_at | 1448834_at   | 0.8818 |
| SOX11 | SKP2          | 1436790_a_at | 1449293_a_at | 0.8876 |
| SOX11 | SOX4          | 1436790_a_at | 1449370_at   | 0.9349 |
| SOX11 | SUPT16H       | 1436790_a_at | 1449578_at   | 0.9108 |
| SOX11 | CCNB1         | 1436790_a_at | 1449675_at   | 0.8786 |
| SOX11 | LFNG          | 1436790_a_at | 1449943_at   | 0.8287 |
| SOX11 | 4933411K20RIK | 1436790_a_at | 1450076_at   | 0.8842 |
| SOX11 | TCERG1        | 1436790_a_at | 1450100_a_at | 0.8921 |
| SOX11 | ASCL1         | 1436790_a_at | 1450164_at   | 0.9073 |
| SOX11 | ZFP354C       | 1436790_a_at | 1450321_at   | 0.8707 |
| SOX11 | SOX3          | 1436790_a_at | 1450485_at   | 0.8589 |
| SOX11 | HMGA2         | 1436790_a_at | 1450780_s_at | 0.8031 |
| SOX11 | PA2G4         | 1436790_a_at | 1450854_at   | 0.8468 |
| SOX11 | NCOR2         | 1436790_a_at | 1451841_a_at | 0.8740 |
| SOX11 | ZFP2          | 1436790_a_at | 1452025_a_at | 0.8616 |
| SOX11 | 6720460F02RIK | 1436790_a_at | 1452073_at   | 0.8984 |
| SOX11 | RRP1B         | 1436790_a_at | 1452119_at   | 0.8330 |
| SOX11 | NOVA1         | 1436790_a_at | 1452245_at   | 0.8385 |
| SOX11 | PVT1          | 1436790_a_at | 1452324_at   | 0.8984 |
| SOX11 | CENPF         | 1436790_a_at | 1452334_at   | 0.8802 |
| SOX11 | ADAMTS7       | 1436790_a_at | 1452339_at   | 0.9107 |
| SOX11 | ASPM          | 1436790_a_at | 1452459_at   | 0.8951 |
| SOX11 | RHOBTB3       | 1436790_a_at | 1453227_at   | 0.9030 |
| SOX11 | TROAP         | 1436790_a_at | 1453370_at   | 0.8602 |
| SOX11 | CEP55         | 1436790_a_at | 1453683_a_at | 0.8649 |
| SOX11 | DHX38         | 1436790_a_at | 1453751_at   | 0.8829 |
| SOX11 | PHF6          | 1436790_a_at | 1453761_at   | 0.8741 |
| SOX11 | FAM110A       | 1436790_a_at | 1453768_a_at | 0.8471 |
| SOX11 | NETO2         | 1436790_a_at | 1454032_at   | 0.9579 |

|         |                       |              |                       |        |
|---------|-----------------------|--------------|-----------------------|--------|
| SOX11   | CCDC77                | 1436790_a_at | 1454228_a_at          | 0.8070 |
| SOX11   | EXOD1                 | 1436790_a_at | 1454229_a_at          | 0.8963 |
| SOX11   | XKR5                  | 1436790_a_at | 1455127_at            | 0.8070 |
| SOX11   | UTP23                 | 1436790_a_at | 1455259_a_at          | 0.8533 |
| SOX11   | 2700049P18RIK         | 1436790_a_at | 1456163_at            | 0.8046 |
| SOX11   | AV254764              | 1436790_a_at | 1456951_at            | 0.8034 |
| SOX11   | PLDN                  | 1436790_a_at | 1457088_at            | 0.8541 |
| SOX11   | NETO2                 | 1436790_a_at | 1457344_at            | 0.8113 |
| SOX11   | TAF2                  | 1436790_a_at | 1457351_at            | 0.8745 |
| SOX11   | RNF219                | 1436790_a_at | 1458636_at            | 0.8700 |
| SOX11   | 6530418L21RIK         | 1436790_a_at | 1459051_at            | 0.8541 |
| SOX11   | AFFX-DapX-5_at        | 1436790_a_at | AFFX-DapX-5_at        | 0.8055 |
| SOX11   | AFFX-r2-Bs-thr-5_s_at | 1436790_a_at | AFFX-r2-Bs-thr-5_s_at | 0.8139 |
| SOX11   | AFFX-ThrX-5_at        | 1436790_a_at | AFFX-ThrX-5_at        | 0.8387 |
| RAD51C  | 4922501L14RIK         | 1438453_at   | 1436969_at            | 0.8814 |
| TAF1D   | 4922501L14RIK         | 1442289_at   | 1436969_at            | 0.8236 |
| SUPT16H | 4922501L14RIK         | 1449578_at   | 1436969_at            | 0.8316 |
| ASCL1   | 4922501L14RIK         | 1450164_at   | 1436969_at            | 0.8463 |
| MYBL1   | 4922501L14RIK         | 1450481_at   | 1436969_at            | 0.8067 |
| SOX3    | 4922501L14RIK         | 1450485_at   | 1436969_at            | 0.8268 |
| HMGA2   | 4922501L14RIK         | 1450780_s_at | 1436969_at            | 0.9021 |
| HMGA2   | 4922501L14RIK         | 1450781_at   | 1436969_at            | 0.8509 |
| ZNF451  | 4922501L14RIK         | 1451816_at   | 1436969_at            | 0.8472 |
| ZBED3   | 4922501L14RIK         | 1452088_at   | 1436969_at            | 0.8353 |
| PHF6    | 4922501L14RIK         | 1453761_at   | 1436969_at            | 0.8277 |
| ASCL1   | 2810408I11RIK         | 1437086_at   | 1437549_at            | 0.8153 |
| ASCL1   | AV164956              | 1437086_at   | 1437673_at            | 0.8472 |
| ASCL1   | HEATR5B               | 1437086_at   | 1438085_at            | 0.8095 |
| ASCL1   | 4933432K03RIK         | 1437086_at   | 1438356_x_at          | 0.8382 |
| ASCL1   | RAD51C                | 1437086_at   | 1438453_at            | 0.8363 |
| ASCL1   | DHX33                 | 1437086_at   | 1438765_at            | 0.8431 |
| ASCL1   | FANCD2                | 1437086_at   | 1439091_at            | 0.8109 |
| ASCL1   | A1506816              | 1437086_at   | 1439483_at            | 0.8629 |
| ASCL1   | A1746468              | 1437086_at   | 1439960_at            | 0.8375 |
| ASCL1   | ABCC12                | 1437086_at   | 1439985_at            | 0.8469 |
| ASCL1   | A930024E05RIK         | 1437086_at   | 1440206_at            | 0.9035 |
| ASCL1   | SPRY4                 | 1437086_at   | 1440867_at            | 0.8202 |
| ASCL1   | KBTBD8                | 1437086_at   | 1441275_at            | 0.8314 |
| ASCL1   | NKRF                  | 1437086_at   | 1441325_at            | 0.8438 |
| ASCL1   | AU043080              | 1437086_at   | 1441375_at            | 0.8194 |
| ASCL1   | ASPM                  | 1437086_at   | 1441520_at            | 0.8096 |
| ASCL1   | D2ERTD750E            | 1437086_at   | 1442280_at            | 0.9547 |
| ASCL1   | KCND3                 | 1437086_at   | 1442555_at            | 0.8232 |
| ASCL1   | TTK                   | 1437086_at   | 1442594_at            | 0.8570 |
| ASCL1   | AW545941              | 1437086_at   | 1443007_at            | 0.8115 |
| ASCL1   | BB337104              | 1437086_at   | 1443026_at            | 0.8308 |
| ASCL1   | BB444561              | 1437086_at   | 1443171_at            | 0.8568 |
| ASCL1   | BB130444              | 1437086_at   | 1443410_at            | 0.8170 |
| ASCL1   | ZBTB39                | 1437086_at   | 1443880_at            | 0.8244 |
| ASCL1   | CDK5RAP2              | 1437086_at   | 1443976_at            | 0.8064 |
| ASCL1   | ERCC6L                | 1437086_at   | 1444024_at            | 0.8589 |

|       |                       |            |                       |        |
|-------|-----------------------|------------|-----------------------|--------|
| ASCL1 | AV228095              | 1437086_at | 1444443_at            | 0.8585 |
| ASCL1 | 6530418L21RIK         | 1437086_at | 1444723_at            | 0.8774 |
| ASCL1 | MASTL                 | 1437086_at | 1444725_at            | 0.8535 |
| ASCL1 | BC023969              | 1437086_at | 1445226_at            | 0.8587 |
| ASCL1 | AV323315              | 1437086_at | 1445298_at            | 0.9299 |
| ASCL1 | KCND3                 | 1437086_at | 1447513_at            | 0.8625 |
| ASCL1 | SEMA6D                | 1437086_at | 1448060_at            | 0.8177 |
| ASCL1 | OGG1                  | 1437086_at | 1448815_at            | 0.8121 |
| ASCL1 | FOXM1                 | 1437086_at | 1448834_at            | 0.9050 |
| ASCL1 | SKP2                  | 1437086_at | 1449293_a_at          | 0.8547 |
| ASCL1 | SOX4                  | 1437086_at | 1449370_at            | 0.8126 |
| ASCL1 | SUPT16H               | 1437086_at | 1449578_at            | 0.8153 |
| ASCL1 | CCNB1                 | 1437086_at | 1449675_at            | 0.8451 |
| ASCL1 | LFNG                  | 1437086_at | 1449943_at            | 0.8254 |
| ASCL1 | 4933411K20RIK         | 1437086_at | 1450076_at            | 0.8437 |
| ASCL1 | TCERG1                | 1437086_at | 1450100_a_at          | 0.8348 |
| ASCL1 | NPAS3                 | 1437086_at | 1450287_at            | 0.8340 |
| ASCL1 | ZFP354C               | 1437086_at | 1450321_at            | 0.8239 |
| ASCL1 | SHC3                  | 1437086_at | 1450326_at            | 0.8401 |
| ASCL1 | SOX3                  | 1437086_at | 1450485_at            | 0.8359 |
| ASCL1 | HMGA2                 | 1437086_at | 1450780_s_at          | 0.8417 |
| ASCL1 | NCOR2                 | 1437086_at | 1451841_a_at          | 0.8583 |
| ASCL1 | ZFP2                  | 1437086_at | 1452025_a_at          | 0.8277 |
| ASCL1 | 6720460F02RIK         | 1437086_at | 1452073_at            | 0.9531 |
| ASCL1 | RRP1B                 | 1437086_at | 1452119_at            | 0.8362 |
| ASCL1 | NOVA1                 | 1437086_at | 1452245_at            | 0.9164 |
| ASCL1 | CENPF                 | 1437086_at | 1452334_at            | 0.8314 |
| ASCL1 | 4930427A07RIK         | 1437086_at | 1452337_at            | 0.8491 |
| ASCL1 | ADAMTS7               | 1437086_at | 1452339_at            | 0.8361 |
| ASCL1 | ASPM                  | 1437086_at | 1452459_at            | 0.9015 |
| ASCL1 | TTF2                  | 1437086_at | 1452818_at            | 0.8418 |
| ASCL1 | RHOBTB3               | 1437086_at | 1453227_at            | 0.8643 |
| ASCL1 | TROAP                 | 1437086_at | 1453370_at            | 0.8375 |
| ASCL1 | CEP55                 | 1437086_at | 1453683_a_at          | 0.8415 |
| ASCL1 | DHX38                 | 1437086_at | 1453751_at            | 0.8587 |
| ASCL1 | PHF6                  | 1437086_at | 1453761_at            | 0.8478 |
| ASCL1 | FAM110A               | 1437086_at | 1453768_a_at          | 0.8059 |
| ASCL1 | NETO2                 | 1437086_at | 1454032_at            | 0.8469 |
| ASCL1 | EXOD1                 | 1437086_at | 1454229_a_at          | 0.8733 |
| ASCL1 | XKR5                  | 1437086_at | 1455127_at            | 0.8450 |
| ASCL1 | UTP23                 | 1437086_at | 1455259_a_at          | 0.8240 |
| ASCL1 | BB053540              | 1437086_at | 1456840_at            | 0.8580 |
| ASCL1 | BM235636              | 1437086_at | 1456853_at            | 0.8060 |
| ASCL1 | AV254764              | 1437086_at | 1456951_at            | 0.8620 |
| ASCL1 | TAF2                  | 1437086_at | 1457351_at            | 0.8433 |
| ASCL1 | RNF219                | 1437086_at | 1458636_at            | 0.8392 |
| ASCL1 | 6530418L21RIK         | 1437086_at | 1459051_at            | 0.8224 |
| ASCL1 | BB527979              | 1437086_at | 1459950_at            | 0.8285 |
| ASCL1 | AFFX-DapX-5_at        | 1437086_at | AFFX-DapX-5_at        | 0.8340 |
| ASCL1 | AFFX-r2-Bs-dap-5_at   | 1437086_at | AFFX-r2-Bs-dap-5_at   | 0.8147 |
| ASCL1 | AFFX-r2-Bs-thr-5_s_at | 1437086_at | AFFX-r2-Bs-thr-5_s_at | 0.8175 |

|         |                |              |                |        |
|---------|----------------|--------------|----------------|--------|
| ASCL1   | AFFX-ThrX-5_at | 1437086_at   | AFFX-ThrX-5_at | 0.8198 |
| FOXM1   | LRRC4B         | 1448834_at   | 1437183_at     | 0.8017 |
| ASCL1   | LRRC4B         | 1450164_at   | 1437183_at     | 0.8326 |
| NCOR2   | LRRC4B         | 1451841_a_at | 1437183_at     | 0.8291 |
| RAD51C  | 281040811RIK   | 1438453_at   | 1437549_at     | 0.9306 |
| NKRF    | 281040811RIK   | 1441325_at   | 1437549_at     | 0.9741 |
| TAF1D   | 281040811RIK   | 1442289_at   | 1437549_at     | 0.9564 |
| FOXM1   | 281040811RIK   | 1448834_at   | 1437549_at     | 0.9043 |
| SUPT16H | 281040811RIK   | 1449578_at   | 1437549_at     | 0.9398 |
| TCERG1  | 281040811RIK   | 1450100_a_at | 1437549_at     | 0.9762 |
| ASCL1   | 281040811RIK   | 1450164_at   | 1437549_at     | 0.9118 |
| ZFP354C | 281040811RIK   | 1450321_at   | 1437549_at     | 0.8294 |
| MED1    | 281040811RIK   | 1450402_at   | 1437549_at     | 0.9046 |
| MYBL1   | 281040811RIK   | 1450481_at   | 1437549_at     | 0.9879 |
| SOX3    | 281040811RIK   | 1450485_at   | 1437549_at     | 0.9452 |
| SALL1   | 281040811RIK   | 1450489_at   | 1437549_at     | 0.8686 |
| HMGA2   | 281040811RIK   | 1450780_s_at | 1437549_at     | 0.9681 |
| HMGA2   | 281040811RIK   | 1450781_at   | 1437549_at     | 0.9166 |
| ZNF451  | 281040811RIK   | 1451816_at   | 1437549_at     | 0.9784 |
| NCOR2   | 281040811RIK   | 1451841_a_at | 1437549_at     | 0.8792 |
| ZFP2    | 281040811RIK   | 1452025_a_at | 1437549_at     | 0.8937 |
| ZBED3   | 281040811RIK   | 1452088_at   | 1437549_at     | 0.9532 |
| CENPF   | 281040811RIK   | 1452334_at   | 1437549_at     | 0.8569 |
| MLF1IP  | 281040811RIK   | 1452816_at   | 1437549_at     | 0.9559 |
| TTF2    | 281040811RIK   | 1452818_at   | 1437549_at     | 0.9675 |
| HELLS   | 281040811RIK   | 1453361_at   | 1437549_at     | 0.9094 |
| PHF6    | 281040811RIK   | 1453761_at   | 1437549_at     | 0.9883 |
| TAF2    | 281040811RIK   | 1457351_at   | 1437549_at     | 0.9800 |
| ZNF69   | 281040811RIK   | 1458274_at   | 1437549_at     | 0.8924 |
| TAF1D   | PIGT           | 1442289_at   | 1437594_x_at   | 0.9367 |
| MED1    | PIGT           | 1450402_at   | 1437594_x_at   | 0.8834 |
| MYBL1   | PIGT           | 1450481_at   | 1437594_x_at   | 0.8641 |
| HMGA2   | PIGT           | 1450780_s_at | 1437594_x_at   | 0.8693 |
| HMGA2   | PIGT           | 1450781_at   | 1437594_x_at   | 0.9471 |
| ZNF451  | PIGT           | 1451816_at   | 1437594_x_at   | 0.9088 |
| ZBED3   | PIGT           | 1452088_at   | 1437594_x_at   | 0.9164 |
| MLF1IP  | PIGT           | 1452816_at   | 1437594_x_at   | 0.8382 |
| TTF2    | PIGT           | 1452818_at   | 1437594_x_at   | 0.8133 |
| HELLS   | PIGT           | 1453361_at   | 1437594_x_at   | 0.8634 |
| RAD51C  | AV164956       | 1438453_at   | 1437673_at     | 0.8232 |
| NKRF    | AV164956       | 1441325_at   | 1437673_at     | 0.9165 |
| TAF1D   | AV164956       | 1442289_at   | 1437673_at     | 0.8168 |
| TEAD2   | AV164956       | 1448519_at   | 1437673_at     | 0.8486 |
| FOXM1   | AV164956       | 1448834_at   | 1437673_at     | 0.9105 |
| SUPT16H | AV164956       | 1449578_at   | 1437673_at     | 0.8754 |
| TCERG1  | AV164956       | 1450100_a_at | 1437673_at     | 0.9052 |
| ASCL1   | AV164956       | 1450164_at   | 1437673_at     | 0.8834 |
| ZFP354C | AV164956       | 1450321_at   | 1437673_at     | 0.8498 |
| MYBL1   | AV164956       | 1450481_at   | 1437673_at     | 0.8730 |
| SOX3    | AV164956       | 1450485_at   | 1437673_at     | 0.9023 |
| HMGA2   | AV164956       | 1450780_s_at | 1437673_at     | 0.8437 |

|         |               |              |              |        |
|---------|---------------|--------------|--------------|--------|
| ZNF451  | AV164956      | 1451816_at   | 1437673_at   | 0.8549 |
| NCOR2   | AV164956      | 1451841_a_at | 1437673_at   | 0.9053 |
| ZFP2    | AV164956      | 1452025_a_at | 1437673_at   | 0.8348 |
| ZBED3   | AV164956      | 1452088_at   | 1437673_at   | 0.8204 |
| CENPF   | AV164956      | 1452334_at   | 1437673_at   | 0.8549 |
| MLF1IP  | AV164956      | 1452816_at   | 1437673_at   | 0.8386 |
| TTF2    | AV164956      | 1452818_at   | 1437673_at   | 0.9117 |
| PHF6    | AV164956      | 1453761_at   | 1437673_at   | 0.9269 |
| TAF2    | AV164956      | 1457351_at   | 1437673_at   | 0.9139 |
| ZNF69   | AV164956      | 1458274_at   | 1437673_at   | 0.8252 |
| CREB5   | HEATR1        | 1442576_at   | 1437965_at   | 0.8007 |
| FOXM1   | HEATR1        | 1448834_at   | 1437965_at   | 0.8403 |
| MLF1IP  | HEATR1        | 1452816_at   | 1437965_at   | 0.8067 |
| RAD51C  | HEATR5B       | 1438453_at   | 1438085_at   | 0.8439 |
| NKRF    | HEATR5B       | 1441325_at   | 1438085_at   | 0.9345 |
| FOXM1   | HEATR5B       | 1448834_at   | 1438085_at   | 0.9014 |
| SOX4    | HEATR5B       | 1449370_at   | 1438085_at   | 0.8135 |
| SUPT16H | HEATR5B       | 1449578_at   | 1438085_at   | 0.8699 |
| TCERG1  | HEATR5B       | 1450100_a_at | 1438085_at   | 0.9357 |
| ASCL1   | HEATR5B       | 1450164_at   | 1438085_at   | 0.9147 |
| ZFP354C | HEATR5B       | 1450321_at   | 1438085_at   | 0.9550 |
| MYBL1   | HEATR5B       | 1450481_at   | 1438085_at   | 0.8493 |
| SOX3    | HEATR5B       | 1450485_at   | 1438085_at   | 0.8977 |
| HMGA2   | HEATR5B       | 1450780_s_at | 1438085_at   | 0.8065 |
| NCOR2   | HEATR5B       | 1451841_a_at | 1438085_at   | 0.9072 |
| ZFP2    | HEATR5B       | 1452025_a_at | 1438085_at   | 0.8864 |
| CENPF   | HEATR5B       | 1452334_at   | 1438085_at   | 0.9548 |
| MLF1IP  | HEATR5B       | 1452816_at   | 1438085_at   | 0.8006 |
| TTF2    | HEATR5B       | 1452818_at   | 1438085_at   | 0.8901 |
| PHF6    | HEATR5B       | 1453761_at   | 1438085_at   | 0.8902 |
| TAF2    | HEATR5B       | 1457351_at   | 1438085_at   | 0.9341 |
| ZNF69   | HEATR5B       | 1458274_at   | 1438085_at   | 0.9138 |
| RAD51C  | 4933432K03RIK | 1438453_at   | 1438356_x_at | 0.9179 |
| NKRF    | 4933432K03RIK | 1441325_at   | 1438356_x_at | 0.9818 |
| TAF1D   | 4933432K03RIK | 1442289_at   | 1438356_x_at | 0.9069 |
| FOXM1   | 4933432K03RIK | 1448834_at   | 1438356_x_at | 0.9221 |
| SOX4    | 4933432K03RIK | 1449370_at   | 1438356_x_at | 0.8122 |
| SUPT16H | 4933432K03RIK | 1449578_at   | 1438356_x_at | 0.9369 |
| TCERG1  | 4933432K03RIK | 1450100_a_at | 1438356_x_at | 0.9804 |
| ASCL1   | 4933432K03RIK | 1450164_at   | 1438356_x_at | 0.9403 |
| ZFP354C | 4933432K03RIK | 1450321_at   | 1438356_x_at | 0.8846 |
| MED1    | 4933432K03RIK | 1450402_at   | 1438356_x_at | 0.8549 |
| MYBL1   | 4933432K03RIK | 1450481_at   | 1438356_x_at | 0.9597 |
| SOX3    | 4933432K03RIK | 1450485_at   | 1438356_x_at | 0.9544 |
| SALL1   | 4933432K03RIK | 1450489_at   | 1438356_x_at | 0.8431 |
| HMGA2   | 4933432K03RIK | 1450780_s_at | 1438356_x_at | 0.9365 |
| HMGA2   | 4933432K03RIK | 1450781_at   | 1438356_x_at | 0.8551 |
| ZNF451  | 4933432K03RIK | 1451816_at   | 1438356_x_at | 0.9425 |
| NCOR2   | 4933432K03RIK | 1451841_a_at | 1438356_x_at | 0.9074 |
| ZFP2    | 4933432K03RIK | 1452025_a_at | 1438356_x_at | 0.9082 |
| ZBED3   | 4933432K03RIK | 1452088_at   | 1438356_x_at | 0.9097 |

|        |               |            |              |        |
|--------|---------------|------------|--------------|--------|
| CENPF  | 4933432K03RIK | 1452334_at | 1438356_x_at | 0.8995 |
| MLF1IP | 4933432K03RIK | 1452816_at | 1438356_x_at | 0.9219 |
| TTF2   | 4933432K03RIK | 1452818_at | 1438356_x_at | 0.9573 |
| HELLS  | 4933432K03RIK | 1453361_at | 1438356_x_at | 0.8647 |
| PHF6   | 4933432K03RIK | 1453761_at | 1438356_x_at | 0.9842 |
| TAF2   | 4933432K03RIK | 1457351_at | 1438356_x_at | 0.9846 |
| ZNF69  | 4933432K03RIK | 1458274_at | 1438356_x_at | 0.8934 |
| RAD51C | DHX33         | 1438453_at | 1438765_at   | 0.9205 |
| RAD51C | AHI1          | 1438453_at | 1439083_at   | 0.8866 |
| RAD51C | FANCD2        | 1438453_at | 1439091_at   | 0.9190 |
| RAD51C | AI506816      | 1438453_at | 1439483_at   | 0.8772 |
| RAD51C | AI746468      | 1438453_at | 1439960_at   | 0.8976 |
| RAD51C | A930024E05RIK | 1438453_at | 1440206_at   | 0.9192 |
| RAD51C | WDR35         | 1438453_at | 1440318_at   | 0.8138 |
| RAD51C | SPRY4         | 1438453_at | 1440867_at   | 0.8194 |
| RAD51C | KIF20B        | 1438453_at | 1440924_at   | 0.9107 |
| RAD51C | A430071A18RIK | 1438453_at | 1441113_at   | 0.8313 |
| RAD51C | MATR3         | 1438453_at | 1441272_at   | 0.9155 |
| RAD51C | KBTBD8        | 1438453_at | 1441275_at   | 0.9374 |
| RAD51C | NKRF          | 1438453_at | 1441325_at   | 0.9143 |
| RAD51C | AU043080      | 1438453_at | 1441375_at   | 0.9033 |
| RAD51C | ASPM          | 1438453_at | 1441520_at   | 0.8233 |
| RAD51C | D2ERTD750E    | 1438453_at | 1442280_at   | 0.8631 |
| RAD51C | TAF1D         | 1438453_at | 1442289_at   | 0.8694 |
| RAD51C | NUP188        | 1438453_at | 1442314_at   | 0.8160 |
| RAD51C | TTK           | 1438453_at | 1442594_at   | 0.9210 |
| RAD51C | AW545941      | 1438453_at | 1443007_at   | 0.8626 |
| RAD51C | BB444561      | 1438453_at | 1443171_at   | 0.9552 |
| RAD51C | BM202761      | 1438453_at | 1443800_at   | 0.8840 |
| RAD51C | ZBTB39        | 1438453_at | 1443880_at   | 0.8607 |
| RAD51C | ERCC6L        | 1438453_at | 1444024_at   | 0.9215 |
| RAD51C | AV228095      | 1438453_at | 1444443_at   | 0.9544 |
| RAD51C | 6530418L21RIK | 1438453_at | 1444723_at   | 0.8593 |
| RAD51C | MASTL         | 1438453_at | 1444725_at   | 0.9200 |
| RAD51C | BC023969      | 1438453_at | 1445226_at   | 0.8958 |
| RAD51C | C530044C16RIK | 1438453_at | 1445247_at   | 0.8136 |
| RAD51C | AV323315      | 1438453_at | 1445298_at   | 0.9207 |
| RAD51C | 9330118A15RIK | 1438453_at | 1446612_at   | 0.8342 |
| RAD51C | KCND3         | 1438453_at | 1447513_at   | 0.9057 |
| RAD51C | OGG1          | 1438453_at | 1448815_at   | 0.9051 |
| RAD51C | FOXM1         | 1438453_at | 1448834_at   | 0.8740 |
| RAD51C | SKP2          | 1438453_at | 1449293_a_at | 0.9284 |
| RAD51C | SOX4          | 1438453_at | 1449370_at   | 0.8528 |
| RAD51C | SUPT16H       | 1438453_at | 1449578_at   | 0.9334 |
| RAD51C | CCNB1         | 1438453_at | 1449675_at   | 0.9286 |
| RAD51C | 4933411K20RIK | 1438453_at | 1450076_at   | 0.9359 |
| RAD51C | TCERG1        | 1438453_at | 1450100_a_at | 0.9307 |
| RAD51C | ASCL1         | 1438453_at | 1450164_at   | 0.9300 |
| RAD51C | MED1          | 1438453_at | 1450402_at   | 0.8188 |
| RAD51C | MYBL1         | 1438453_at | 1450481_at   | 0.9192 |
| RAD51C | SOX3          | 1438453_at | 1450485_at   | 0.8828 |



|         |               |              |              |        |
|---------|---------------|--------------|--------------|--------|
| RAD51C  | HMGA2         | 1438453_at   | 1450780_s_at | 0.9464 |
| RAD51C  | HMGA2         | 1438453_at   | 1450781_at   | 0.8266 |
| RAD51C  | PA2G4         | 1438453_at   | 1450854_at   | 0.8036 |
| RAD51C  | ZNF451        | 1438453_at   | 1451816_at   | 0.8935 |
| RAD51C  | NCOR2         | 1438453_at   | 1451841_a_at | 0.8319 |
| RAD51C  | LMNB2         | 1438453_at   | 1451849_a_at | 0.8289 |
| RAD51C  | ZFP2          | 1438453_at   | 1452025_a_at | 0.8844 |
| RAD51C  | 6720460F02RIK | 1438453_at   | 1452073_at   | 0.8921 |
| RAD51C  | ZBED3         | 1438453_at   | 1452088_at   | 0.8643 |
| RAD51C  | RRP1B         | 1438453_at   | 1452119_at   | 0.8470 |
| RAD51C  | NOVA1         | 1438453_at   | 1452245_at   | 0.8828 |
| RAD51C  | CENPF         | 1438453_at   | 1452334_at   | 0.8555 |
| RAD51C  | ASPM          | 1438453_at   | 1452459_at   | 0.9125 |
| RAD51C  | MLF1IP        | 1438453_at   | 1452816_at   | 0.8872 |
| RAD51C  | TTF2          | 1438453_at   | 1452818_at   | 0.8859 |
| RAD51C  | TMEM138       | 1438453_at   | 1452978_at   | 0.8477 |
| RAD51C  | RHOBTB3       | 1438453_at   | 1453227_at   | 0.9012 |
| RAD51C  | HELLS         | 1438453_at   | 1453361_at   | 0.8038 |
| RAD51C  | TROAP         | 1438453_at   | 1453370_at   | 0.9154 |
| RAD51C  | CEP55         | 1438453_at   | 1453683_a_at | 0.9341 |
| RAD51C  | DHX38         | 1438453_at   | 1453751_at   | 0.8598 |
| RAD51C  | PHF6          | 1438453_at   | 1453761_at   | 0.9324 |
| RAD51C  | FAM110A       | 1438453_at   | 1453768_a_at | 0.8354 |
| RAD51C  | NETO2         | 1438453_at   | 1454032_at   | 0.8920 |
| RAD51C  | CCDC77        | 1438453_at   | 1454228_a_at | 0.9027 |
| RAD51C  | EXOD1         | 1438453_at   | 1454229_a_at | 0.9271 |
| RAD51C  | UTP23         | 1438453_at   | 1455259_a_at | 0.9327 |
| RAD51C  | 2700049P18RIK | 1438453_at   | 1456163_at   | 0.8897 |
| RAD51C  | RTEL1         | 1438453_at   | 1456729_x_at | 0.8531 |
| RAD51C  | BB053540      | 1438453_at   | 1456840_at   | 0.8008 |
| RAD51C  | AV254764      | 1438453_at   | 1456951_at   | 0.9447 |
| RAD51C  | TAF2          | 1438453_at   | 1457351_at   | 0.9192 |
| RAD51C  | ZNF69         | 1438453_at   | 1458274_at   | 0.8458 |
| RAD51C  | MTR           | 1438453_at   | 1458532_at   | 0.8585 |
| RAD51C  | RNF219        | 1438453_at   | 1458636_at   | 0.9194 |
| RAD51C  | BB463474      | 1438453_at   | 1458902_at   | 0.8978 |
| RAD51C  | BB527979      | 1438453_at   | 1459950_at   | 0.8027 |
| RAD51C  | AA763515      | 1438453_at   | 1460065_at   | 0.8206 |
| NKRF    | DHX33         | 1441325_at   | 1438765_at   | 0.9536 |
| TAF1D   | DHX33         | 1442289_at   | 1438765_at   | 0.8805 |
| FOXM1   | DHX33         | 1448834_at   | 1438765_at   | 0.9099 |
| SOX4    | DHX33         | 1449370_at   | 1438765_at   | 0.8350 |
| SUPT16H | DHX33         | 1449578_at   | 1438765_at   | 0.9337 |
| TCERG1  | DHX33         | 1450100_a_at | 1438765_at   | 0.9615 |
| ASCL1   | DHX33         | 1450164_at   | 1438765_at   | 0.9381 |
| ZFP354C | DHX33         | 1450321_at   | 1438765_at   | 0.8668 |
| MYBL1   | DHX33         | 1450481_at   | 1438765_at   | 0.9443 |
| SOX3    | DHX33         | 1450485_at   | 1438765_at   | 0.9179 |
| SALL1   | DHX33         | 1450489_at   | 1438765_at   | 0.8232 |
| HMGA2   | DHX33         | 1450780_s_at | 1438765_at   | 0.9068 |
| HMGA2   | DHX33         | 1450781_at   | 1438765_at   | 0.8138 |

|         |           |              |            |        |
|---------|-----------|--------------|------------|--------|
| ZNF451  | DHX33     | 1451816_at   | 1438765_at | 0.9097 |
| NCOR2   | DHX33     | 1451841_a_at | 1438765_at | 0.9195 |
| ZFP2    | DHX33     | 1452025_a_at | 1438765_at | 0.9272 |
| ZBED3   | DHX33     | 1452088_at   | 1438765_at | 0.8568 |
| CENPF   | DHX33     | 1452334_at   | 1438765_at | 0.9059 |
| MLF1IP  | DHX33     | 1452816_at   | 1438765_at | 0.8952 |
| TTF2    | DHX33     | 1452818_at   | 1438765_at | 0.9155 |
| HELLS   | DHX33     | 1453361_at   | 1438765_at | 0.8329 |
| PHF6    | DHX33     | 1453761_at   | 1438765_at | 0.9812 |
| TAF2    | DHX33     | 1457351_at   | 1438765_at | 0.9609 |
| ZNF69   | DHX33     | 1458274_at   | 1438765_at | 0.8736 |
| NPAS3   | ADCYAP1R1 | 1450287_at   | 1439042_at | 0.8857 |
| NKRF    | AHI1      | 1441325_at   | 1439083_at | 0.8768 |
| TAF1D   | AHI1      | 1442289_at   | 1439083_at | 0.8239 |
| FOXM1   | AHI1      | 1448834_at   | 1439083_at | 0.8403 |
| SOX4    | AHI1      | 1449370_at   | 1439083_at | 0.8329 |
| SUPT16H | AHI1      | 1449578_at   | 1439083_at | 0.9497 |
| TCERG1  | AHI1      | 1450100_a_at | 1439083_at | 0.9071 |
| ASCL1   | AHI1      | 1450164_at   | 1439083_at | 0.8543 |
| ZFP354C | AHI1      | 1450321_at   | 1439083_at | 0.8068 |
| MYBL1   | AHI1      | 1450481_at   | 1439083_at | 0.8608 |
| SOX3    | AHI1      | 1450485_at   | 1439083_at | 0.8694 |
| SALL1   | AHI1      | 1450489_at   | 1439083_at | 0.8035 |
| HMGA2   | AHI1      | 1450780_s_at | 1439083_at | 0.8358 |
| ZNF451  | AHI1      | 1451816_at   | 1439083_at | 0.8572 |
| NCOR2   | AHI1      | 1451841_a_at | 1439083_at | 0.8562 |
| ZFP2    | AHI1      | 1452025_a_at | 1439083_at | 0.8899 |
| ZBED3   | AHI1      | 1452088_at   | 1439083_at | 0.8117 |
| CENPF   | AHI1      | 1452334_at   | 1439083_at | 0.8056 |
| MLF1IP  | AHI1      | 1452816_at   | 1439083_at | 0.8158 |
| TTF2    | AHI1      | 1452818_at   | 1439083_at | 0.8302 |
| PHF6    | AHI1      | 1453761_at   | 1439083_at | 0.8965 |
| TAF2    | AHI1      | 1457351_at   | 1439083_at | 0.8755 |
| ZNF69   | AHI1      | 1458274_at   | 1439083_at | 0.8136 |
| NKRF    | FANCD2    | 1441325_at   | 1439091_at | 0.9407 |
| TAF1D   | FANCD2    | 1442289_at   | 1439091_at | 0.8565 |
| FOXM1   | FANCD2    | 1448834_at   | 1439091_at | 0.8899 |
| SUPT16H | FANCD2    | 1449578_at   | 1439091_at | 0.8985 |
| TCERG1  | FANCD2    | 1450100_a_at | 1439091_at | 0.9297 |
| ASCL1   | FANCD2    | 1450164_at   | 1439091_at | 0.9107 |
| ZFP354C | FANCD2    | 1450321_at   | 1439091_at | 0.8420 |
| MED1    | FANCD2    | 1450402_at   | 1439091_at | 0.8238 |
| MYBL1   | FANCD2    | 1450481_at   | 1439091_at | 0.9099 |
| SOX3    | FANCD2    | 1450485_at   | 1439091_at | 0.9060 |
| HMGA2   | FANCD2    | 1450780_s_at | 1439091_at | 0.9163 |
| HMGA2   | FANCD2    | 1450781_at   | 1439091_at | 0.8078 |
| ZNF451  | FANCD2    | 1451816_at   | 1439091_at | 0.8937 |
| NCOR2   | FANCD2    | 1451841_a_at | 1439091_at | 0.8589 |
| ZFP2    | FANCD2    | 1452025_a_at | 1439091_at | 0.8429 |
| ZBED3   | FANCD2    | 1452088_at   | 1439091_at | 0.8641 |
| CENPF   | FANCD2    | 1452334_at   | 1439091_at | 0.8620 |

|         |          |              |            |        |
|---------|----------|--------------|------------|--------|
| MLF1IP  | FANCD2   | 1452816_at   | 1439091_at | 0.9029 |
| TTF2    | FANCD2   | 1452818_at   | 1439091_at | 0.9147 |
| HELLS   | FANCD2   | 1453361_at   | 1439091_at | 0.8174 |
| PHF6    | FANCD2   | 1453761_at   | 1439091_at | 0.9323 |
| TAF2    | FANCD2   | 1457351_at   | 1439091_at | 0.9359 |
| ZNF69   | FANCD2   | 1458274_at   | 1439091_at | 0.8736 |
| NKRF    | AI506816 | 1441325_at   | 1439483_at | 0.9552 |
| FOXM1   | AI506816 | 1448834_at   | 1439483_at | 0.9371 |
| SOX4    | AI506816 | 1449370_at   | 1439483_at | 0.8656 |
| SUPT16H | AI506816 | 1449578_at   | 1439483_at | 0.9140 |
| TCERG1  | AI506816 | 1450100_a_at | 1439483_at | 0.9525 |
| ASCL1   | AI506816 | 1450164_at   | 1439483_at | 0.9651 |
| ZFP354C | AI506816 | 1450321_at   | 1439483_at | 0.9553 |
| MYBL1   | AI506816 | 1450481_at   | 1439483_at | 0.8646 |
| SOX3    | AI506816 | 1450485_at   | 1439483_at | 0.9434 |
| HMGA2   | AI506816 | 1450780_s_at | 1439483_at | 0.8393 |
| ZNF451  | AI506816 | 1451816_at   | 1439483_at | 0.8318 |
| NCOR2   | AI506816 | 1451841_a_at | 1439483_at | 0.9766 |
| ZFP2    | AI506816 | 1452025_a_at | 1439483_at | 0.9481 |
| CENPF   | AI506816 | 1452334_at   | 1439483_at | 0.9512 |
| MLF1IP  | AI506816 | 1452816_at   | 1439483_at | 0.8217 |
| TTF2    | AI506816 | 1452818_at   | 1439483_at | 0.8944 |
| PHF6    | AI506816 | 1453761_at   | 1439483_at | 0.9549 |
| TAF2    | AI506816 | 1457351_at   | 1439483_at | 0.9526 |
| ZNF69   | AI506816 | 1458274_at   | 1439483_at | 0.8499 |
| CENPF   | INTS10   | 1452334_at   | 1439712_at | 0.8024 |
| NKRF    | AI746468 | 1441325_at   | 1439960_at | 0.9836 |
| TAF1D   | AI746468 | 1442289_at   | 1439960_at | 0.9043 |
| FOXM1   | AI746468 | 1448834_at   | 1439960_at | 0.9195 |
| SOX4    | AI746468 | 1449370_at   | 1439960_at | 0.8023 |
| SUPT16H | AI746468 | 1449578_at   | 1439960_at | 0.9325 |
| TCERG1  | AI746468 | 1450100_a_at | 1439960_at | 0.9772 |
| ASCL1   | AI746468 | 1450164_at   | 1439960_at | 0.9222 |
| ZFP354C | AI746468 | 1450321_at   | 1439960_at | 0.9050 |
| MED1    | AI746468 | 1450402_at   | 1439960_at | 0.8660 |
| MYBL1   | AI746468 | 1450481_at   | 1439960_at | 0.9477 |
| SOX3    | AI746468 | 1450485_at   | 1439960_at | 0.9748 |
| SALL1   | AI746468 | 1450489_at   | 1439960_at | 0.8513 |
| HMGA2   | AI746468 | 1450780_s_at | 1439960_at | 0.9346 |
| HMGA2   | AI746468 | 1450781_at   | 1439960_at | 0.8770 |
| ZNF451  | AI746468 | 1451816_at   | 1439960_at | 0.9486 |
| NCOR2   | AI746468 | 1451841_a_at | 1439960_at | 0.9056 |
| ZFP2    | AI746468 | 1452025_a_at | 1439960_at | 0.9010 |
| ZBED3   | AI746468 | 1452088_at   | 1439960_at | 0.9372 |
| CENPF   | AI746468 | 1452334_at   | 1439960_at | 0.8428 |
| MLF1IP  | AI746468 | 1452816_at   | 1439960_at | 0.8997 |
| TTF2    | AI746468 | 1452818_at   | 1439960_at | 0.9568 |
| HELLS   | AI746468 | 1453361_at   | 1439960_at | 0.8977 |
| PHF6    | AI746468 | 1453761_at   | 1439960_at | 0.9648 |
| TAF2    | AI746468 | 1457351_at   | 1439960_at | 0.9787 |
| ZNF69   | AI746468 | 1458274_at   | 1439960_at | 0.8871 |

|         |               |              |            |        |
|---------|---------------|--------------|------------|--------|
| NKRF    | ABCC12        | 1441325_at   | 1439985_at | 0.8878 |
| TAF1D   | ABCC12        | 1442289_at   | 1439985_at | 0.8313 |
| TEAD2   | ABCC12        | 1448519_at   | 1439985_at | 0.8289 |
| FOXM1   | ABCC12        | 1448834_at   | 1439985_at | 0.9205 |
| SUPT16H | ABCC12        | 1449578_at   | 1439985_at | 0.8604 |
| TCERG1  | ABCC12        | 1450100_a_at | 1439985_at | 0.8788 |
| ASCL1   | ABCC12        | 1450164_at   | 1439985_at | 0.8362 |
| NPAS3   | ABCC12        | 1450287_at   | 1439985_at | 0.8586 |
| MYBL1   | ABCC12        | 1450481_at   | 1439985_at | 0.8666 |
| SOX3    | ABCC12        | 1450485_at   | 1439985_at | 0.8774 |
| HMGA2   | ABCC12        | 1450780_s_at | 1439985_at | 0.8602 |
| ZNF451  | ABCC12        | 1451816_at   | 1439985_at | 0.8633 |
| NCOR2   | ABCC12        | 1451841_a_at | 1439985_at | 0.8454 |
| ZFP2    | ABCC12        | 1452025_a_at | 1439985_at | 0.8069 |
| ZBED3   | ABCC12        | 1452088_at   | 1439985_at | 0.8423 |
| MLF1IP  | ABCC12        | 1452816_at   | 1439985_at | 0.8600 |
| TTF2    | ABCC12        | 1452818_at   | 1439985_at | 0.9027 |
| HELLS   | ABCC12        | 1453361_at   | 1439985_at | 0.8060 |
| PHF6    | ABCC12        | 1453761_at   | 1439985_at | 0.8900 |
| TAF2    | ABCC12        | 1457351_at   | 1439985_at | 0.8885 |
| ZNF69   | ABCC12        | 1458274_at   | 1439985_at | 0.8083 |
| NKRF    | A930024E05RIK | 1441325_at   | 1440206_at | 0.9527 |
| TAF1D   | A930024E05RIK | 1442289_at   | 1440206_at | 0.8247 |
| FOXM1   | A930024E05RIK | 1448834_at   | 1440206_at | 0.9228 |
| SOX4    | A930024E05RIK | 1449370_at   | 1440206_at | 0.8487 |
| SUPT16H | A930024E05RIK | 1449578_at   | 1440206_at | 0.9225 |
| TCERG1  | A930024E05RIK | 1450100_a_at | 1440206_at | 0.9462 |
| ASCL1   | A930024E05RIK | 1450164_at   | 1440206_at | 0.9656 |
| ZFP354C | A930024E05RIK | 1450321_at   | 1440206_at | 0.9142 |
| MYBL1   | A930024E05RIK | 1450481_at   | 1440206_at | 0.8968 |
| SOX3    | A930024E05RIK | 1450485_at   | 1440206_at | 0.9329 |
| HMGA2   | A930024E05RIK | 1450780_s_at | 1440206_at | 0.9021 |
| ZNF451  | A930024E05RIK | 1451816_at   | 1440206_at | 0.8652 |
| NCOR2   | A930024E05RIK | 1451841_a_at | 1440206_at | 0.9309 |
| ZFP2    | A930024E05RIK | 1452025_a_at | 1440206_at | 0.9436 |
| ZBED3   | A930024E05RIK | 1452088_at   | 1440206_at | 0.8250 |
| CENPF   | A930024E05RIK | 1452334_at   | 1440206_at | 0.9141 |
| MLF1IP  | A930024E05RIK | 1452816_at   | 1440206_at | 0.8550 |
| TTF2    | A930024E05RIK | 1452818_at   | 1440206_at | 0.9127 |
| PHF6    | A930024E05RIK | 1453761_at   | 1440206_at | 0.9464 |
| TAF2    | A930024E05RIK | 1457351_at   | 1440206_at | 0.9509 |
| ZNF69   | A930024E05RIK | 1458274_at   | 1440206_at | 0.8643 |
| NKRF    | WDR35         | 1441325_at   | 1440318_at | 0.8060 |
| SUPT16H | WDR35         | 1449578_at   | 1440318_at | 0.8756 |
| TCERG1  | WDR35         | 1450100_a_at | 1440318_at | 0.8332 |
| CENPF   | WDR35         | 1452334_at   | 1440318_at | 0.8010 |
| PHF6    | WDR35         | 1453761_at   | 1440318_at | 0.8053 |
| TAF2    | WDR35         | 1457351_at   | 1440318_at | 0.8074 |
| FOXM1   | SPRY4         | 1448834_at   | 1440867_at | 0.8055 |
| ASCL1   | SPRY4         | 1450164_at   | 1440867_at | 0.8767 |
| HMGA2   | SPRY4         | 1450780_s_at | 1440867_at | 0.8343 |

|         |               |              |            |        |
|---------|---------------|--------------|------------|--------|
| TTF2    | SPRY4         | 1452818_at   | 1440867_at | 0.8115 |
| NKRF    | KIF20B        | 1441325_at   | 1440924_at | 0.9592 |
| TAF1D   | KIF20B        | 1442289_at   | 1440924_at | 0.9266 |
| FOXM1   | KIF20B        | 1448834_at   | 1440924_at | 0.8771 |
| SUPT16H | KIF20B        | 1449578_at   | 1440924_at | 0.9077 |
| TCERG1  | KIF20B        | 1450100_a_at | 1440924_at | 0.9559 |
| ASCL1   | KIF20B        | 1450164_at   | 1440924_at | 0.8729 |
| ZFP354C | KIF20B        | 1450321_at   | 1440924_at | 0.8068 |
| MED1    | KIF20B        | 1450402_at   | 1440924_at | 0.9208 |
| MYBL1   | KIF20B        | 1450481_at   | 1440924_at | 0.9722 |
| SOX3    | KIF20B        | 1450485_at   | 1440924_at | 0.8940 |
| SALL1   | KIF20B        | 1450489_at   | 1440924_at | 0.8329 |
| HMGA2   | KIF20B        | 1450780_s_at | 1440924_at | 0.9380 |
| HMGA2   | KIF20B        | 1450781_at   | 1440924_at | 0.8533 |
| ZNF451  | KIF20B        | 1451816_at   | 1440924_at | 0.9487 |
| NCOR2   | KIF20B        | 1451841_a_at | 1440924_at | 0.8091 |
| ZFP2    | KIF20B        | 1452025_a_at | 1440924_at | 0.8453 |
| ZBED3   | KIF20B        | 1452088_at   | 1440924_at | 0.9204 |
| CENPF   | KIF20B        | 1452334_at   | 1440924_at | 0.8505 |
| MLF1IP  | KIF20B        | 1452816_at   | 1440924_at | 0.9597 |
| TTF2    | KIF20B        | 1452818_at   | 1440924_at | 0.9401 |
| HELLS   | KIF20B        | 1453361_at   | 1440924_at | 0.8815 |
| PHF6    | KIF20B        | 1453761_at   | 1440924_at | 0.9498 |
| TAF2    | KIF20B        | 1457351_at   | 1440924_at | 0.9682 |
| ZNF69   | KIF20B        | 1458274_at   | 1440924_at | 0.8913 |
| NKRF    | A430071A18RIK | 1441325_at   | 1441113_at | 0.8354 |
| TAF1D   | A430071A18RIK | 1442289_at   | 1441113_at | 0.9294 |
| SUPT16H | A430071A18RIK | 1449578_at   | 1441113_at | 0.8424 |
| TCERG1  | A430071A18RIK | 1450100_a_at | 1441113_at | 0.8392 |
| MED1    | A430071A18RIK | 1450402_at   | 1441113_at | 0.8171 |
| MYBL1   | A430071A18RIK | 1450481_at   | 1441113_at | 0.9033 |
| SOX3    | A430071A18RIK | 1450485_at   | 1441113_at | 0.8479 |
| SALL1   | A430071A18RIK | 1450489_at   | 1441113_at | 0.8170 |
| HMGA2   | A430071A18RIK | 1450780_s_at | 1441113_at | 0.9138 |
| HMGA2   | A430071A18RIK | 1450781_at   | 1441113_at | 0.9517 |
| ZNF451  | A430071A18RIK | 1451816_at   | 1441113_at | 0.9394 |
| ZBED3   | A430071A18RIK | 1452088_at   | 1441113_at | 0.9263 |
| MLF1IP  | A430071A18RIK | 1452816_at   | 1441113_at | 0.8752 |
| TTF2    | A430071A18RIK | 1452818_at   | 1441113_at | 0.8633 |
| HELLS   | A430071A18RIK | 1453361_at   | 1441113_at | 0.8780 |
| PHF6    | A430071A18RIK | 1453761_at   | 1441113_at | 0.9026 |
| TAF2    | A430071A18RIK | 1457351_at   | 1441113_at | 0.8378 |
| NKRF    | MATR3         | 1441325_at   | 1441272_at | 0.9435 |
| TAF1D   | MATR3         | 1442289_at   | 1441272_at | 0.9672 |
| FOXM1   | MATR3         | 1448834_at   | 1441272_at | 0.8656 |
| SUPT16H | MATR3         | 1449578_at   | 1441272_at | 0.9123 |
| TCERG1  | MATR3         | 1450100_a_at | 1441272_at | 0.9544 |
| ASCL1   | MATR3         | 1450164_at   | 1441272_at | 0.8620 |
| MED1    | MATR3         | 1450402_at   | 1441272_at | 0.9445 |
| MYBL1   | MATR3         | 1450481_at   | 1441272_at | 0.9911 |
| SOX3    | MATR3         | 1450485_at   | 1441272_at | 0.9000 |

|         |            |              |            |        |
|---------|------------|--------------|------------|--------|
| SALL1   | MATR3      | 1450489_at   | 1441272_at | 0.8590 |
| HMGA2   | MATR3      | 1450780_s_at | 1441272_at | 0.9677 |
| HMGA2   | MATR3      | 1450781_at   | 1441272_at | 0.9342 |
| ZNF451  | MATR3      | 1451816_at   | 1441272_at | 0.9783 |
| NCOR2   | MATR3      | 1451841_a_at | 1441272_at | 0.8075 |
| ZFP2    | MATR3      | 1452025_a_at | 1441272_at | 0.8420 |
| ZBED3   | MATR3      | 1452088_at   | 1441272_at | 0.9657 |
| CENPF   | MATR3      | 1452334_at   | 1441272_at | 0.8049 |
| MLF1IP  | MATR3      | 1452816_at   | 1441272_at | 0.9502 |
| TTF2    | MATR3      | 1452818_at   | 1441272_at | 0.9545 |
| HELLS   | MATR3      | 1453361_at   | 1441272_at | 0.9164 |
| PHF6    | MATR3      | 1453761_at   | 1441272_at | 0.9594 |
| TAF2    | MATR3      | 1457351_at   | 1441272_at | 0.9561 |
| ZNF69   | MATR3      | 1458274_at   | 1441272_at | 0.8982 |
| NKRF    | KBTBD8     | 1441325_at   | 1441275_at | 0.9695 |
| TAF1D   | KBTBD8     | 1442289_at   | 1441275_at | 0.9325 |
| FOXM1   | KBTBD8     | 1448834_at   | 1441275_at | 0.9129 |
| SOX4    | KBTBD8     | 1449370_at   | 1441275_at | 0.8046 |
| SUPT16H | KBTBD8     | 1449578_at   | 1441275_at | 0.9397 |
| TCERG1  | KBTBD8     | 1450100_a_at | 1441275_at | 0.9802 |
| ASCL1   | KBTBD8     | 1450164_at   | 1441275_at | 0.9262 |
| ZFP354C | KBTBD8     | 1450321_at   | 1441275_at | 0.8427 |
| MED1    | KBTBD8     | 1450402_at   | 1441275_at | 0.8680 |
| MYBL1   | KBTBD8     | 1450481_at   | 1441275_at | 0.9814 |
| SOX3    | KBTBD8     | 1450485_at   | 1441275_at | 0.9419 |
| SALL1   | KBTBD8     | 1450489_at   | 1441275_at | 0.8596 |
| HMGA2   | KBTBD8     | 1450780_s_at | 1441275_at | 0.9561 |
| HMGA2   | KBTBD8     | 1450781_at   | 1441275_at | 0.8936 |
| ZNF451  | KBTBD8     | 1451816_at   | 1441275_at | 0.9503 |
| NCOR2   | KBTBD8     | 1451841_a_at | 1441275_at | 0.9014 |
| ZFP2    | KBTBD8     | 1452025_a_at | 1441275_at | 0.9073 |
| ZBED3   | KBTBD8     | 1452088_at   | 1441275_at | 0.9242 |
| CENPF   | KBTBD8     | 1452334_at   | 1441275_at | 0.8916 |
| MLF1IP  | KBTBD8     | 1452816_at   | 1441275_at | 0.9375 |
| TTF2    | KBTBD8     | 1452818_at   | 1441275_at | 0.9663 |
| HELLS   | KBTBD8     | 1453361_at   | 1441275_at | 0.8693 |
| PHF6    | KBTBD8     | 1453761_at   | 1441275_at | 0.9918 |
| TAF2    | KBTBD8     | 1457351_at   | 1441275_at | 0.9806 |
| ZNF69   | KBTBD8     | 1458274_at   | 1441275_at | 0.9149 |
| NKRF    | AU043080   | 1441325_at   | 1441375_at | 0.9554 |
| NKRF    | ASPM       | 1441325_at   | 1441520_at | 0.9158 |
| NKRF    | D2ERTD750E | 1441325_at   | 1442280_at | 0.8633 |
| NKRF    | TAF1D      | 1441325_at   | 1442289_at | 0.8917 |
| NKRF    | NUP188     | 1441325_at   | 1442314_at | 0.9122 |
| NKRF    | TTK        | 1441325_at   | 1442594_at | 0.9785 |
| NKRF    | AW545941   | 1441325_at   | 1443007_at | 0.8680 |
| NKRF    | BB337104   | 1441325_at   | 1443026_at | 0.8423 |
| NKRF    | BB444561   | 1441325_at   | 1443171_at | 0.9575 |
| NKRF    | BB130444   | 1441325_at   | 1443410_at | 0.8242 |
| NKRF    | BM202761   | 1441325_at   | 1443800_at | 0.8830 |
| NKRF    | ZBTB39     | 1441325_at   | 1443880_at | 0.9340 |

|      |               |            |              |        |
|------|---------------|------------|--------------|--------|
| NKRF | CDK5RAP2      | 1441325_at | 1443976_at   | 0.8955 |
| NKRF | ERCC6L        | 1441325_at | 1444024_at   | 0.9886 |
| NKRF | AV228095      | 1441325_at | 1444443_at   | 0.9671 |
| NKRF | 6530418L21RIK | 1441325_at | 1444723_at   | 0.9103 |
| NKRF | MASTL         | 1441325_at | 1444725_at   | 0.9332 |
| NKRF | BC023969      | 1441325_at | 1445226_at   | 0.9625 |
| NKRF | C530044C16RIK | 1441325_at | 1445247_at   | 0.8538 |
| NKRF | AV323315      | 1441325_at | 1445298_at   | 0.9034 |
| NKRF | KCND3         | 1441325_at | 1447513_at   | 0.9765 |
| NKRF | SEMA6D        | 1441325_at | 1448060_at   | 0.8954 |
| NKRF | OGG1          | 1441325_at | 1448815_at   | 0.9724 |
| NKRF | FOXM1         | 1441325_at | 1448834_at   | 0.9352 |
| NKRF | SKP2          | 1441325_at | 1449293_a_at | 0.9889 |
| NKRF | SOX4          | 1441325_at | 1449370_at   | 0.8301 |
| NKRF | SUPT16H       | 1441325_at | 1449578_at   | 0.9426 |
| NKRF | CCNB1         | 1441325_at | 1449675_at   | 0.9795 |
| NKRF | LFNG          | 1441325_at | 1449943_at   | 0.8915 |
| NKRF | APC           | 1441325_at | 1450056_at   | 0.8820 |
| NKRF | 4933411K20RIK | 1441325_at | 1450076_at   | 0.9718 |
| NKRF | TCERG1        | 1441325_at | 1450100_a_at | 0.9851 |
| NKRF | ASCL1         | 1441325_at | 1450164_at   | 0.9436 |
| NKRF | ZFP354C       | 1441325_at | 1450321_at   | 0.9177 |
| NKRF | SHC3          | 1441325_at | 1450326_at   | 0.8497 |
| NKRF | MED1          | 1441325_at | 1450402_at   | 0.8474 |
| NKRF | MYBL1         | 1441325_at | 1450481_at   | 0.9499 |
| NKRF | SOX3          | 1441325_at | 1450485_at   | 0.9794 |
| NKRF | SALL1         | 1441325_at | 1450489_at   | 0.8484 |
| NKRF | HMGA2         | 1441325_at | 1450780_s_at | 0.9287 |
| NKRF | HMGA2         | 1441325_at | 1450781_at   | 0.8389 |
| NKRF | ZNF451        | 1441325_at | 1451816_at   | 0.9368 |
| NKRF | NCOR2         | 1441325_at | 1451841_a_at | 0.9276 |
| NKRF | LMNB2         | 1441325_at | 1451849_a_at | 0.9001 |
| NKRF | ZFP2          | 1441325_at | 1452025_a_at | 0.9200 |
| NKRF | 6720460F02RIK | 1441325_at | 1452073_at   | 0.9269 |
| NKRF | ZBED3         | 1441325_at | 1452088_at   | 0.9091 |
| NKRF | RRP1B         | 1441325_at | 1452119_at   | 0.9078 |
| NKRF | NOVA1         | 1441325_at | 1452245_at   | 0.8370 |
| NKRF | PVT1          | 1441325_at | 1452324_at   | 0.8002 |
| NKRF | CENPF         | 1441325_at | 1452334_at   | 0.8992 |
| NKRF | ADAMTS7       | 1441325_at | 1452339_at   | 0.8098 |
| NKRF | ASPM          | 1441325_at | 1452459_at   | 0.9527 |
| NKRF | MLF1IP        | 1441325_at | 1452816_at   | 0.9264 |
| NKRF | TTF2          | 1441325_at | 1452818_at   | 0.9598 |
| NKRF | TMEM138       | 1441325_at | 1452978_at   | 0.9237 |
| NKRF | RHOBTB3       | 1441325_at | 1453227_at   | 0.9713 |
| NKRF | HELLS         | 1441325_at | 1453361_at   | 0.8718 |
| NKRF | TROAP         | 1441325_at | 1453370_at   | 0.9927 |
| NKRF | CEP55         | 1441325_at | 1453683_a_at | 0.9787 |
| NKRF | DHX38         | 1441325_at | 1453751_at   | 0.9696 |
| NKRF | PHF6          | 1441325_at | 1453761_at   | 0.9774 |
| NKRF | FAM110A       | 1441325_at | 1453768_a_at | 0.8685 |

|         |                       |              |                       |        |
|---------|-----------------------|--------------|-----------------------|--------|
| NKRF    | NETO2                 | 1441325_at   | 1454032_at            | 0.8860 |
| NKRF    | CCDC77                | 1441325_at   | 1454228_a_at          | 0.9373 |
| NKRF    | EXOD1                 | 1441325_at   | 1454229_a_at          | 0.9807 |
| NKRF    | XKR5                  | 1441325_at   | 1455127_at            | 0.8400 |
| NKRF    | UTP23                 | 1441325_at   | 1455259_a_at          | 0.9674 |
| NKRF    | 2700049P18RIK         | 1441325_at   | 1456163_at            | 0.9534 |
| NKRF    | RTEL1                 | 1441325_at   | 1456729_x_at          | 0.8549 |
| NKRF    | BB053540              | 1441325_at   | 1456840_at            | 0.8421 |
| NKRF    | AV254764              | 1441325_at   | 1456951_at            | 0.8943 |
| NKRF    | TAF2                  | 1441325_at   | 1457351_at            | 0.9940 |
| NKRF    | ZNF69                 | 1441325_at   | 1458274_at            | 0.8904 |
| NKRF    | MTR                   | 1441325_at   | 1458532_at            | 0.9121 |
| NKRF    | RNF219                | 1441325_at   | 1458636_at            | 0.9790 |
| NKRF    | BB463474              | 1441325_at   | 1458902_at            | 0.8615 |
| NKRF    | 6530418L21RIK         | 1441325_at   | 1459051_at            | 0.8396 |
| NKRF    | AFFX-DapX-5_at        | 1441325_at   | AFFX-DapX-5_at        | 0.8877 |
| NKRF    | AFFX-LysX-5_at        | 1441325_at   | AFFX-LysX-5_at        | 0.8514 |
| NKRF    | AFFX-r2-Bs-dap-5_at   | 1441325_at   | AFFX-r2-Bs-dap-5_at   | 0.8769 |
| NKRF    | AFFX-r2-Bs-lys-5_at   | 1441325_at   | AFFX-r2-Bs-lys-5_at   | 0.8755 |
| NKRF    | AFFX-r2-Bs-thr-5_s_at | 1441325_at   | AFFX-r2-Bs-thr-5_s_at | 0.8617 |
| NKRF    | AFFX-ThrX-5_at        | 1441325_at   | AFFX-ThrX-5_at        | 0.8604 |
| TAF1D   | AU043080              | 1442289_at   | 1441375_at            | 0.8397 |
| FOXM1   | AU043080              | 1448834_at   | 1441375_at            | 0.9008 |
| SOX4    | AU043080              | 1449370_at   | 1441375_at            | 0.8086 |
| SUPT16H | AU043080              | 1449578_at   | 1441375_at            | 0.9022 |
| TCERG1  | AU043080              | 1450100_a_at | 1441375_at            | 0.9639 |
| ASCL1   | AU043080              | 1450164_at   | 1441375_at            | 0.9096 |
| ZFP354C | AU043080              | 1450321_at   | 1441375_at            | 0.8785 |
| MED1    | AU043080              | 1450402_at   | 1441375_at            | 0.8119 |
| MYBL1   | AU043080              | 1450481_at   | 1441375_at            | 0.9286 |
| SOX3    | AU043080              | 1450485_at   | 1441375_at            | 0.8905 |
| HMGA2   | AU043080              | 1450780_s_at | 1441375_at            | 0.8793 |
| ZNF451  | AU043080              | 1451816_at   | 1441375_at            | 0.8672 |
| NCOR2   | AU043080              | 1451841_a_at | 1441375_at            | 0.8674 |
| ZFP2    | AU043080              | 1452025_a_at | 1441375_at            | 0.8847 |
| ZBED3   | AU043080              | 1452088_at   | 1441375_at            | 0.8293 |
| CENPF   | AU043080              | 1452334_at   | 1441375_at            | 0.9343 |
| MLF1IP  | AU043080              | 1452816_at   | 1441375_at            | 0.8933 |
| TTF2    | AU043080              | 1452818_at   | 1441375_at            | 0.9179 |
| PHF6    | AU043080              | 1453761_at   | 1441375_at            | 0.9468 |
| TAF2    | AU043080              | 1457351_at   | 1441375_at            | 0.9714 |
| ZNF69   | AU043080              | 1458274_at   | 1441375_at            | 0.9151 |
| FOXM1   | ASPM                  | 1448834_at   | 1441520_at            | 0.8876 |
| SOX4    | ASPM                  | 1449370_at   | 1441520_at            | 0.8241 |
| SUPT16H | ASPM                  | 1449578_at   | 1441520_at            | 0.8462 |
| TCERG1  | ASPM                  | 1450100_a_at | 1441520_at            | 0.9128 |
| ASCL1   | ASPM                  | 1450164_at   | 1441520_at            | 0.9050 |
| ZFP354C | ASPM                  | 1450321_at   | 1441520_at            | 0.9463 |
| MYBL1   | ASPM                  | 1450481_at   | 1441520_at            | 0.8084 |
| SOX3    | ASPM                  | 1450485_at   | 1441520_at            | 0.8673 |
| NCOR2   | ASPM                  | 1451841_a_at | 1441520_at            | 0.8952 |



|         |               |              |              |        |
|---------|---------------|--------------|--------------|--------|
| ZFP2    | ASPM          | 1452025_a_at | 1441520_at   | 0.8785 |
| CENPF   | ASPM          | 1452334_at   | 1441520_at   | 0.9575 |
| TTF2    | ASPM          | 1452818_at   | 1441520_at   | 0.8425 |
| PHF6    | ASPM          | 1453761_at   | 1441520_at   | 0.8744 |
| TAF2    | ASPM          | 1457351_at   | 1441520_at   | 0.9199 |
| ZNF69   | ASPM          | 1458274_at   | 1441520_at   | 0.8620 |
| TAF1D   | CCDC38        | 1442289_at   | 1441965_at   | 0.8773 |
| MED1    | CCDC38        | 1450402_at   | 1441965_at   | 0.8692 |
| MYBL1   | CCDC38        | 1450481_at   | 1441965_at   | 0.8287 |
| HMGA2   | CCDC38        | 1450780_s_at | 1441965_at   | 0.8170 |
| HMGA2   | CCDC38        | 1450781_at   | 1441965_at   | 0.8655 |
| ZNF451  | CCDC38        | 1451816_at   | 1441965_at   | 0.8521 |
| ZBED3   | CCDC38        | 1452088_at   | 1441965_at   | 0.8417 |
| MLF1IP  | CCDC38        | 1452816_at   | 1441965_at   | 0.8217 |
| FOXM1   | D2ERTD750E    | 1448834_at   | 1442280_at   | 0.9480 |
| SOX4    | D2ERTD750E    | 1449370_at   | 1442280_at   | 0.8039 |
| SUPT16H | D2ERTD750E    | 1449578_at   | 1442280_at   | 0.8346 |
| TCERG1  | D2ERTD750E    | 1450100_a_at | 1442280_at   | 0.8518 |
| ASCL1   | D2ERTD750E    | 1450164_at   | 1442280_at   | 0.9204 |
| NPAS3   | D2ERTD750E    | 1450287_at   | 1442280_at   | 0.8404 |
| ZFP354C | D2ERTD750E    | 1450321_at   | 1442280_at   | 0.8179 |
| MYBL1   | D2ERTD750E    | 1450481_at   | 1442280_at   | 0.8146 |
| SOX3    | D2ERTD750E    | 1450485_at   | 1442280_at   | 0.8500 |
| HMGA2   | D2ERTD750E    | 1450780_s_at | 1442280_at   | 0.8716 |
| NCOR2   | D2ERTD750E    | 1451841_a_at | 1442280_at   | 0.8505 |
| ZFP2    | D2ERTD750E    | 1452025_a_at | 1442280_at   | 0.8350 |
| CENPF   | D2ERTD750E    | 1452334_at   | 1442280_at   | 0.8307 |
| MLF1IP  | D2ERTD750E    | 1452816_at   | 1442280_at   | 0.8058 |
| TTF2    | D2ERTD750E    | 1452818_at   | 1442280_at   | 0.8821 |
| PHF6    | D2ERTD750E    | 1453761_at   | 1442280_at   | 0.8655 |
| TAF2    | D2ERTD750E    | 1457351_at   | 1442280_at   | 0.8622 |
| TAF1D   | NUP188        | 1442289_at   | 1442314_at   | 0.8027 |
| TAF1D   | TTK           | 1442289_at   | 1442594_at   | 0.8806 |
| TAF1D   | AW545941      | 1442289_at   | 1443007_at   | 0.8726 |
| TAF1D   | BB444561      | 1442289_at   | 1443171_at   | 0.8874 |
| TAF1D   | BM202761      | 1442289_at   | 1443800_at   | 0.9510 |
| TAF1D   | ZBTB39        | 1442289_at   | 1443880_at   | 0.8337 |
| TAF1D   | ERCC6L        | 1442289_at   | 1444024_at   | 0.8864 |
| TAF1D   | AV228095      | 1442289_at   | 1444443_at   | 0.9200 |
| TAF1D   | MASTL         | 1442289_at   | 1444725_at   | 0.8679 |
| TAF1D   | BC023969      | 1442289_at   | 1445226_at   | 0.8099 |
| TAF1D   | C530044C16RIK | 1442289_at   | 1445247_at   | 0.8980 |
| TAF1D   | AV323315      | 1442289_at   | 1445298_at   | 0.8058 |
| TAF1D   | 9330118A15RIK | 1442289_at   | 1446612_at   | 0.9078 |
| TAF1D   | BE953578      | 1442289_at   | 1447298_at   | 0.8729 |
| TAF1D   | KCND3         | 1442289_at   | 1447513_at   | 0.8604 |
| TAF1D   | OGG1          | 1442289_at   | 1448815_at   | 0.9112 |
| TAF1D   | FOXM1         | 1442289_at   | 1448834_at   | 0.8058 |
| TAF1D   | SKP2          | 1442289_at   | 1449293_a_at | 0.8997 |
| TAF1D   | SUPT16H       | 1442289_at   | 1449578_at   | 0.8744 |
| TAF1D   | CCNB1         | 1442289_at   | 1449675_at   | 0.8944 |

|         |               |              |              |        |
|---------|---------------|--------------|--------------|--------|
| TAF1D   | 4933411K20RIK | 1442289_at   | 1450076_at   | 0.8990 |
| TAF1D   | TCERG1        | 1442289_at   | 1450100_a_at | 0.9015 |
| TAF1D   | ASCL1         | 1442289_at   | 1450164_at   | 0.8054 |
| TAF1D   | MED1          | 1442289_at   | 1450402_at   | 0.9426 |
| TAF1D   | MYBL1         | 1442289_at   | 1450481_at   | 0.9617 |
| TAF1D   | SOX3          | 1442289_at   | 1450485_at   | 0.8645 |
| TAF1D   | SALL1         | 1442289_at   | 1450489_at   | 0.8326 |
| TAF1D   | HMGA2         | 1442289_at   | 1450780_s_at | 0.9527 |
| TAF1D   | HMGA2         | 1442289_at   | 1450781_at   | 0.9571 |
| TAF1D   | ZNF451        | 1442289_at   | 1451816_at   | 0.9798 |
| TAF1D   | LMNB2         | 1442289_at   | 1451849_a_at | 0.9221 |
| TAF1D   | ZFP2          | 1442289_at   | 1452025_a_at | 0.8075 |
| TAF1D   | 6720460F02RIK | 1442289_at   | 1452073_at   | 0.8035 |
| TAF1D   | ZBED3         | 1442289_at   | 1452088_at   | 0.9618 |
| TAF1D   | RRP1B         | 1442289_at   | 1452119_at   | 0.8626 |
| TAF1D   | ASPM          | 1442289_at   | 1452459_at   | 0.8316 |
| TAF1D   | AAK1          | 1442289_at   | 1452632_at   | 0.8037 |
| TAF1D   | MLF1IP        | 1442289_at   | 1452816_at   | 0.9353 |
| TAF1D   | TTF2          | 1442289_at   | 1452818_at   | 0.9208 |
| TAF1D   | TMEM138       | 1442289_at   | 1452978_at   | 0.8913 |
| TAF1D   | RHOBTB3       | 1442289_at   | 1453227_at   | 0.8322 |
| TAF1D   | HELLS         | 1442289_at   | 1453361_at   | 0.9315 |
| TAF1D   | TROAP         | 1442289_at   | 1453370_at   | 0.9230 |
| TAF1D   | CEP55         | 1442289_at   | 1453683_a_at | 0.9351 |
| TAF1D   | DHX38         | 1442289_at   | 1453751_at   | 0.8109 |
| TAF1D   | PHF6          | 1442289_at   | 1453761_at   | 0.9186 |
| TAF1D   | CCDC77        | 1442289_at   | 1454228_a_at | 0.9502 |
| TAF1D   | EXOD1         | 1442289_at   | 1454229_a_at | 0.8763 |
| TAF1D   | UTP23         | 1442289_at   | 1455259_a_at | 0.9216 |
| TAF1D   | IER5L         | 1442289_at   | 1455881_at   | 0.8182 |
| TAF1D   | 2700049P18RIK | 1442289_at   | 1456163_at   | 0.9057 |
| TAF1D   | DTL           | 1442289_at   | 1456652_at   | 0.8057 |
| TAF1D   | RTEL1         | 1442289_at   | 1456729_x_at | 0.8793 |
| TAF1D   | AV254764      | 1442289_at   | 1456951_at   | 0.9173 |
| TAF1D   | TAF2          | 1442289_at   | 1457351_at   | 0.8960 |
| TAF1D   | ETAA1         | 1442289_at   | 1457882_at   | 0.9102 |
| TAF1D   | ZNF69         | 1442289_at   | 1458274_at   | 0.8286 |
| TAF1D   | MTR           | 1442289_at   | 1458532_at   | 0.8928 |
| TAF1D   | RNF219        | 1442289_at   | 1458636_at   | 0.9094 |
| TAF1D   | BB463474      | 1442289_at   | 1458902_at   | 0.9423 |
| TAF1D   | AA763515      | 1442289_at   | 1460065_at   | 0.9535 |
| FOXM1   | NUP188        | 1448834_at   | 1442314_at   | 0.8345 |
| SUPT16H | NUP188        | 1449578_at   | 1442314_at   | 0.8367 |
| TCERG1  | NUP188        | 1450100_a_at | 1442314_at   | 0.8947 |
| ASCL1   | NUP188        | 1450164_at   | 1442314_at   | 0.8361 |
| ZFP354C | NUP188        | 1450321_at   | 1442314_at   | 0.8657 |
| MED1    | NUP188        | 1450402_at   | 1442314_at   | 0.8623 |
| MYBL1   | NUP188        | 1450481_at   | 1442314_at   | 0.8487 |
| SOX3    | NUP188        | 1450485_at   | 1442314_at   | 0.8807 |
| HMGA2   | NUP188        | 1450780_s_at | 1442314_at   | 0.8440 |
| ZNF451  | NUP188        | 1451816_at   | 1442314_at   | 0.8440 |

|         |          |              |            |        |
|---------|----------|--------------|------------|--------|
| ZBED3   | NUP188   | 1452088_at   | 1442314_at | 0.8352 |
| CENPF   | NUP188   | 1452334_at   | 1442314_at | 0.8079 |
| MLF1IP  | NUP188   | 1452816_at   | 1442314_at | 0.8147 |
| TTF2    | NUP188   | 1452818_at   | 1442314_at | 0.8730 |
| HELLS   | NUP188   | 1453361_at   | 1442314_at | 0.8173 |
| PHF6    | NUP188   | 1453761_at   | 1442314_at | 0.8396 |
| TAF2    | NUP188   | 1457351_at   | 1442314_at | 0.8952 |
| ZNF69   | NUP188   | 1458274_at   | 1442314_at | 0.8216 |
| CREB5   | ADAMTS6  | 1442576_at   | 1457548_at | 0.8500 |
| FOXM1   | TTK      | 1448834_at   | 1442594_at | 0.9414 |
| SOX4    | TTK      | 1449370_at   | 1442594_at | 0.8391 |
| SUPT16H | TTK      | 1449578_at   | 1442594_at | 0.9403 |
| TCERG1  | TTK      | 1450100_a_at | 1442594_at | 0.9762 |
| ASCL1   | TTK      | 1450164_at   | 1442594_at | 0.9569 |
| ZFP354C | TTK      | 1450321_at   | 1442594_at | 0.9042 |
| MED1    | TTK      | 1450402_at   | 1442594_at | 0.8050 |
| MYBL1   | TTK      | 1450481_at   | 1442594_at | 0.9372 |
| SOX3    | TTK      | 1450485_at   | 1442594_at | 0.9500 |
| SALL1   | TTK      | 1450489_at   | 1442594_at | 0.8283 |
| HMGA2   | TTK      | 1450780_s_at | 1442594_at | 0.9148 |
| HMGA2   | TTK      | 1450781_at   | 1442594_at | 0.8065 |
| ZNF451  | TTK      | 1451816_at   | 1442594_at | 0.9135 |
| NCOR2   | TTK      | 1451841_a_at | 1442594_at | 0.9406 |
| ZFP2    | TTK      | 1452025_a_at | 1442594_at | 0.9332 |
| ZBED3   | TTK      | 1452088_at   | 1442594_at | 0.8636 |
| CENPF   | TTK      | 1452334_at   | 1442594_at | 0.9389 |
| MLF1IP  | TTK      | 1452816_at   | 1442594_at | 0.9097 |
| TTF2    | TTK      | 1452818_at   | 1442594_at | 0.9399 |
| HELLS   | TTK      | 1453361_at   | 1442594_at | 0.8352 |
| PHF6    | TTK      | 1453761_at   | 1442594_at | 0.9874 |
| TAF2    | TTK      | 1457351_at   | 1442594_at | 0.9785 |
| ZNF69   | TTK      | 1458274_at   | 1442594_at | 0.8817 |
| PA2G4   | DGKK     | 1450854_at   | 1442865_at | 0.8578 |
| FOXM1   | AW545941 | 1448834_at   | 1443007_at | 0.8142 |
| SUPT16H | AW545941 | 1449578_at   | 1443007_at | 0.8416 |
| TCERG1  | AW545941 | 1450100_a_at | 1443007_at | 0.8649 |
| ASCL1   | AW545941 | 1450164_at   | 1443007_at | 0.8338 |
| MED1    | AW545941 | 1450402_at   | 1443007_at | 0.8343 |
| MYBL1   | AW545941 | 1450481_at   | 1443007_at | 0.9142 |
| SOX3    | AW545941 | 1450485_at   | 1443007_at | 0.8513 |
| HMGA2   | AW545941 | 1450780_s_at | 1443007_at | 0.9047 |
| HMGA2   | AW545941 | 1450781_at   | 1443007_at | 0.8419 |
| ZNF451  | AW545941 | 1451816_at   | 1443007_at | 0.8785 |
| ZFP2    | AW545941 | 1452025_a_at | 1443007_at | 0.8007 |
| ZBED3   | AW545941 | 1452088_at   | 1443007_at | 0.8694 |
| MLF1IP  | AW545941 | 1452816_at   | 1443007_at | 0.8591 |
| TTF2    | AW545941 | 1452818_at   | 1443007_at | 0.8561 |
| HELLS   | AW545941 | 1453361_at   | 1443007_at | 0.8179 |
| PHF6    | AW545941 | 1453761_at   | 1443007_at | 0.8761 |
| TAF2    | AW545941 | 1457351_at   | 1443007_at | 0.8736 |
| FOXM1   | BB337104 | 1448834_at   | 1443026_at | 0.9097 |

|         |          |              |            |        |
|---------|----------|--------------|------------|--------|
| SUPT16H | BB337104 | 1449578_at   | 1443026_at | 0.8210 |
| TCERG1  | BB337104 | 1450100_a_at | 1443026_at | 0.8461 |
| ASCL1   | BB337104 | 1450164_at   | 1443026_at | 0.8516 |
| NPAS3   | BB337104 | 1450287_at   | 1443026_at | 0.8216 |
| ZFP354C | BB337104 | 1450321_at   | 1443026_at | 0.8407 |
| SOX3    | BB337104 | 1450485_at   | 1443026_at | 0.8409 |
| NCOR2   | BB337104 | 1451841_a_at | 1443026_at | 0.8853 |
| ZFP2    | BB337104 | 1452025_a_at | 1443026_at | 0.8151 |
| CENPF   | BB337104 | 1452334_at   | 1443026_at | 0.8359 |
| TTF2    | BB337104 | 1452818_at   | 1443026_at | 0.8290 |
| PHF6    | BB337104 | 1453761_at   | 1443026_at | 0.8552 |
| TAF2    | BB337104 | 1457351_at   | 1443026_at | 0.8492 |
| ZNF69   | BB337104 | 1458274_at   | 1443026_at | 0.8081 |
| FOXM1   | BB444561 | 1448834_at   | 1443171_at | 0.9269 |
| SOX4    | BB444561 | 1449370_at   | 1443171_at | 0.8400 |
| SUPT16H | BB444561 | 1449578_at   | 1443171_at | 0.9264 |
| TCERG1  | BB444561 | 1450100_a_at | 1443171_at | 0.9592 |
| ASCL1   | BB444561 | 1450164_at   | 1443171_at | 0.9515 |
| ZFP354C | BB444561 | 1450321_at   | 1443171_at | 0.8586 |
| MED1    | BB444561 | 1450402_at   | 1443171_at | 0.8336 |
| MYBL1   | BB444561 | 1450481_at   | 1443171_at | 0.9423 |
| SOX3    | BB444561 | 1450485_at   | 1443171_at | 0.9354 |
| SALL1   | BB444561 | 1450489_at   | 1443171_at | 0.8196 |
| HMGA2   | BB444561 | 1450780_s_at | 1443171_at | 0.9472 |
| HMGA2   | BB444561 | 1450781_at   | 1443171_at | 0.8464 |
| ZNF451  | BB444561 | 1451816_at   | 1443171_at | 0.9196 |
| NCOR2   | BB444561 | 1451841_a_at | 1443171_at | 0.8964 |
| ZFP2    | BB444561 | 1452025_a_at | 1443171_at | 0.8950 |
| ZBED3   | BB444561 | 1452088_at   | 1443171_at | 0.8912 |
| CENPF   | BB444561 | 1452334_at   | 1443171_at | 0.8918 |
| MLF1IP  | BB444561 | 1452816_at   | 1443171_at | 0.9063 |
| TTF2    | BB444561 | 1452818_at   | 1443171_at | 0.9363 |
| HELLS   | BB444561 | 1453361_at   | 1443171_at | 0.8359 |
| PHF6    | BB444561 | 1453761_at   | 1443171_at | 0.9700 |
| TAF2    | BB444561 | 1457351_at   | 1443171_at | 0.9595 |
| ZNF69   | BB444561 | 1458274_at   | 1443171_at | 0.8787 |
| FOXM1   | BB340127 | 1448834_at   | 1443230_at | 0.8271 |
| SOX4    | BB340127 | 1449370_at   | 1443230_at | 0.8130 |
| ASCL1   | BB340127 | 1450164_at   | 1443230_at | 0.8219 |
| ZFP354C | BB340127 | 1450321_at   | 1443230_at | 0.8293 |
| SOX3    | BB340127 | 1450485_at   | 1443230_at | 0.8047 |
| NCOR2   | BB340127 | 1451841_a_at | 1443230_at | 0.8516 |
| FOXM1   | BB531021 | 1448834_at   | 1443337_at | 0.8151 |
| NPAS3   | BB531021 | 1450287_at   | 1443337_at | 0.8217 |
| FOXM1   | BB130444 | 1448834_at   | 1443410_at | 0.8803 |
| SOX4    | BB130444 | 1449370_at   | 1443410_at | 0.8233 |
| TCERG1  | BB130444 | 1450100_a_at | 1443410_at | 0.8287 |
| ASCL1   | BB130444 | 1450164_at   | 1443410_at | 0.8827 |
| ZFP354C | BB130444 | 1450321_at   | 1443410_at | 0.8923 |
| SOX3    | BB130444 | 1450485_at   | 1443410_at | 0.8073 |
| NCOR2   | BB130444 | 1451841_a_at | 1443410_at | 0.8911 |

|         |          |              |            |        |
|---------|----------|--------------|------------|--------|
| ZFP2    | BB130444 | 1452025_a_at | 1443410_at | 0.8428 |
| CENPF   | BB130444 | 1452334_at   | 1443410_at | 0.9200 |
| PHF6    | BB130444 | 1453761_at   | 1443410_at | 0.8317 |
| TAF2    | BB130444 | 1457351_at   | 1443410_at | 0.8261 |
| SUPT16H | BM202761 | 1449578_at   | 1443800_at | 0.8596 |
| TCERG1  | BM202761 | 1450100_a_at | 1443800_at | 0.8904 |
| ASCL1   | BM202761 | 1450164_at   | 1443800_at | 0.8054 |
| MED1    | BM202761 | 1450402_at   | 1443800_at | 0.9279 |
| MYBL1   | BM202761 | 1450481_at   | 1443800_at | 0.9588 |
| SOX3    | BM202761 | 1450485_at   | 1443800_at | 0.8585 |
| SALL1   | BM202761 | 1450489_at   | 1443800_at | 0.8436 |
| HMGA2   | BM202761 | 1450780_s_at | 1443800_at | 0.9676 |
| HMGA2   | BM202761 | 1450781_at   | 1443800_at | 0.9655 |
| ZNF451  | BM202761 | 1451816_at   | 1443800_at | 0.9627 |
| ZBED3   | BM202761 | 1452088_at   | 1443800_at | 0.9736 |
| MLF1IP  | BM202761 | 1452816_at   | 1443800_at | 0.9203 |
| TTF2    | BM202761 | 1452818_at   | 1443800_at | 0.9175 |
| HELLS   | BM202761 | 1453361_at   | 1443800_at | 0.9094 |
| PHF6    | BM202761 | 1453761_at   | 1443800_at | 0.9033 |
| TAF2    | BM202761 | 1457351_at   | 1443800_at | 0.8964 |
| ZNF69   | BM202761 | 1458274_at   | 1443800_at | 0.8429 |
| FOXM1   | ZBTB39   | 1448834_at   | 1443880_at | 0.8848 |
| SUPT16H | ZBTB39   | 1449578_at   | 1443880_at | 0.8817 |
| TCERG1  | ZBTB39   | 1450100_a_at | 1443880_at | 0.9284 |
| ASCL1   | ZBTB39   | 1450164_at   | 1443880_at | 0.9157 |
| ZFP354C | ZBTB39   | 1450321_at   | 1443880_at | 0.8887 |
| MYBL1   | ZBTB39   | 1450481_at   | 1443880_at | 0.8803 |
| SOX3    | ZBTB39   | 1450485_at   | 1443880_at | 0.9429 |
| SALL1   | ZBTB39   | 1450489_at   | 1443880_at | 0.8115 |
| HMGA2   | ZBTB39   | 1450780_s_at | 1443880_at | 0.8702 |
| HMGA2   | ZBTB39   | 1450781_at   | 1443880_at | 0.8039 |
| ZNF451  | ZBTB39   | 1451816_at   | 1443880_at | 0.8763 |
| NCOR2   | ZBTB39   | 1451841_a_at | 1443880_at | 0.9300 |
| ZFP2    | ZBTB39   | 1452025_a_at | 1443880_at | 0.9028 |
| ZBED3   | ZBTB39   | 1452088_at   | 1443880_at | 0.8466 |
| CENPF   | ZBTB39   | 1452334_at   | 1443880_at | 0.8529 |
| MLF1IP  | ZBTB39   | 1452816_at   | 1443880_at | 0.8332 |
| TTF2    | ZBTB39   | 1452818_at   | 1443880_at | 0.9001 |
| HELLS   | ZBTB39   | 1453361_at   | 1443880_at | 0.8209 |
| PHF6    | ZBTB39   | 1453761_at   | 1443880_at | 0.9406 |
| TAF2    | ZBTB39   | 1457351_at   | 1443880_at | 0.9282 |
| ZNF69   | ZBTB39   | 1458274_at   | 1443880_at | 0.8585 |
| FOXM1   | CDK5RAP2 | 1448834_at   | 1443976_at | 0.9197 |
| SUPT16H | CDK5RAP2 | 1449578_at   | 1443976_at | 0.8283 |
| TCERG1  | CDK5RAP2 | 1450100_a_at | 1443976_at | 0.8878 |
| ASCL1   | CDK5RAP2 | 1450164_at   | 1443976_at | 0.8745 |
| ZFP354C | CDK5RAP2 | 1450321_at   | 1443976_at | 0.8987 |
| MYBL1   | CDK5RAP2 | 1450481_at   | 1443976_at | 0.8030 |
| SOX3    | CDK5RAP2 | 1450485_at   | 1443976_at | 0.8885 |
| NCOR2   | CDK5RAP2 | 1451841_a_at | 1443976_at | 0.9056 |
| ZFP2    | CDK5RAP2 | 1452025_a_at | 1443976_at | 0.9017 |

|         |          |              |            |        |
|---------|----------|--------------|------------|--------|
| CENPF   | CDK5RAP2 | 1452334_at   | 1443976_at | 0.8775 |
| TTF2    | CDK5RAP2 | 1452818_at   | 1443976_at | 0.8640 |
| PHF6    | CDK5RAP2 | 1453761_at   | 1443976_at | 0.8696 |
| TAF2    | CDK5RAP2 | 1457351_at   | 1443976_at | 0.8932 |
| ZNF69   | CDK5RAP2 | 1458274_at   | 1443976_at | 0.8097 |
| FOXM1   | ERCC6L   | 1448834_at   | 1444024_at | 0.9447 |
| SOX4    | ERCC6L   | 1449370_at   | 1444024_at | 0.8439 |
| SUPT16H | ERCC6L   | 1449578_at   | 1444024_at | 0.9466 |
| TCERG1  | ERCC6L   | 1450100_a_at | 1444024_at | 0.9900 |
| ASCL1   | ERCC6L   | 1450164_at   | 1444024_at | 0.9595 |
| ZFP354C | ERCC6L   | 1450321_at   | 1444024_at | 0.9273 |
| MED1    | ERCC6L   | 1450402_at   | 1444024_at | 0.8205 |
| MYBL1   | ERCC6L   | 1450481_at   | 1444024_at | 0.9483 |
| SOX3    | ERCC6L   | 1450485_at   | 1444024_at | 0.9612 |
| SALL1   | ERCC6L   | 1450489_at   | 1444024_at | 0.8397 |
| HMGA2   | ERCC6L   | 1450780_s_at | 1444024_at | 0.9211 |
| HMGA2   | ERCC6L   | 1450781_at   | 1444024_at | 0.8224 |
| ZNF451  | ERCC6L   | 1451816_at   | 1444024_at | 0.9219 |
| NCOR2   | ERCC6L   | 1451841_a_at | 1444024_at | 0.9456 |
| ZFP2    | ERCC6L   | 1452025_a_at | 1444024_at | 0.9393 |
| ZBED3   | ERCC6L   | 1452088_at   | 1444024_at | 0.8794 |
| CENPF   | ERCC6L   | 1452334_at   | 1444024_at | 0.9285 |
| MLF1IP  | ERCC6L   | 1452816_at   | 1444024_at | 0.9074 |
| TTF2    | ERCC6L   | 1452818_at   | 1444024_at | 0.9565 |
| HELLS   | ERCC6L   | 1453361_at   | 1444024_at | 0.8554 |
| PHF6    | ERCC6L   | 1453761_at   | 1444024_at | 0.9857 |
| TAF2    | ERCC6L   | 1457351_at   | 1444024_at | 0.9905 |
| ZNF69   | ERCC6L   | 1458274_at   | 1444024_at | 0.9173 |
| FOXM1   | AV228095 | 1448834_at   | 1444443_at | 0.9255 |
| SOX4    | AV228095 | 1449370_at   | 1444443_at | 0.8239 |
| SUPT16H | AV228095 | 1449578_at   | 1444443_at | 0.9316 |
| TCERG1  | AV228095 | 1450100_a_at | 1444443_at | 0.9722 |
| ASCL1   | AV228095 | 1450164_at   | 1444443_at | 0.9426 |
| ZFP354C | AV228095 | 1450321_at   | 1444443_at | 0.8472 |
| MED1    | AV228095 | 1450402_at   | 1444443_at | 0.8616 |
| MYBL1   | AV228095 | 1450481_at   | 1444443_at | 0.9685 |
| SOX3    | AV228095 | 1450485_at   | 1444443_at | 0.9248 |
| SALL1   | AV228095 | 1450489_at   | 1444443_at | 0.8449 |
| HMGA2   | AV228095 | 1450780_s_at | 1444443_at | 0.9611 |
| HMGA2   | AV228095 | 1450781_at   | 1444443_at | 0.8647 |
| ZNF451  | AV228095 | 1451816_at   | 1444443_at | 0.9482 |
| NCOR2   | AV228095 | 1451841_a_at | 1444443_at | 0.8790 |
| ZFP2    | AV228095 | 1452025_a_at | 1444443_at | 0.9036 |
| ZBED3   | AV228095 | 1452088_at   | 1444443_at | 0.9152 |
| CENPF   | AV228095 | 1452334_at   | 1444443_at | 0.8740 |
| MLF1IP  | AV228095 | 1452816_at   | 1444443_at | 0.9374 |
| TTF2    | AV228095 | 1452818_at   | 1444443_at | 0.9505 |
| HELLS   | AV228095 | 1453361_at   | 1444443_at | 0.8741 |
| PHF6    | AV228095 | 1453761_at   | 1444443_at | 0.9812 |
| TAF2    | AV228095 | 1457351_at   | 1444443_at | 0.9762 |
| ZNF69   | AV228095 | 1458274_at   | 1444443_at | 0.8930 |

|         |               |              |            |        |
|---------|---------------|--------------|------------|--------|
| FOXMI   | 6530418L21RIK | 1448834_at   | 1444723_at | 0.9199 |
| SOX4    | 6530418L21RIK | 1449370_at   | 1444723_at | 0.8547 |
| SUPT16H | 6530418L21RIK | 1449578_at   | 1444723_at | 0.8783 |
| TCERG1  | 6530418L21RIK | 1450100_a_at | 1444723_at | 0.9046 |
| ASCL1   | 6530418L21RIK | 1450164_at   | 1444723_at | 0.9662 |
| ZFP354C | 6530418L21RIK | 1450321_at   | 1444723_at | 0.9469 |
| MYBL1   | 6530418L21RIK | 1450481_at   | 1444723_at | 0.8037 |
| SOX3    | 6530418L21RIK | 1450485_at   | 1444723_at | 0.9087 |
| HMGA2   | 6530418L21RIK | 1450780_s_at | 1444723_at | 0.8077 |
| NCOR2   | 6530418L21RIK | 1451841_a_at | 1444723_at | 0.9665 |
| ZFP2    | 6530418L21RIK | 1452025_a_at | 1444723_at | 0.9268 |
| CENPF   | 6530418L21RIK | 1452334_at   | 1444723_at | 0.9359 |
| TTF2    | 6530418L21RIK | 1452818_at   | 1444723_at | 0.8612 |
| PHF6    | 6530418L21RIK | 1453761_at   | 1444723_at | 0.9076 |
| TAF2    | 6530418L21RIK | 1457351_at   | 1444723_at | 0.9014 |
| ZNF69   | 6530418L21RIK | 1458274_at   | 1444723_at | 0.8184 |
| FOXMI   | MASTL         | 1448834_at   | 1444725_at | 0.9062 |
| SUPT16H | MASTL         | 1449578_at   | 1444725_at | 0.8767 |
| TCERG1  | MASTL         | 1450100_a_at | 1444725_at | 0.9253 |
| ASCL1   | MASTL         | 1450164_at   | 1444725_at | 0.9029 |
| ZFP354C | MASTL         | 1450321_at   | 1444725_at | 0.8118 |
| MED1    | MASTL         | 1450402_at   | 1444725_at | 0.8568 |
| MYBL1   | MASTL         | 1450481_at   | 1444725_at | 0.9218 |
| SOX3    | MASTL         | 1450485_at   | 1444725_at | 0.8736 |
| HMGA2   | MASTL         | 1450780_s_at | 1444725_at | 0.9266 |
| ZNF451  | MASTL         | 1451816_at   | 1444725_at | 0.9032 |
| NCOR2   | MASTL         | 1451841_a_at | 1444725_at | 0.8020 |
| ZFP2    | MASTL         | 1452025_a_at | 1444725_at | 0.8346 |
| ZBED3   | MASTL         | 1452088_at   | 1444725_at | 0.8777 |
| CENPF   | MASTL         | 1452334_at   | 1444725_at | 0.8314 |
| MLF1IP  | MASTL         | 1452816_at   | 1444725_at | 0.9112 |
| TTF2    | MASTL         | 1452818_at   | 1444725_at | 0.9190 |
| HELLS   | MASTL         | 1453361_at   | 1444725_at | 0.8365 |
| PHF6    | MASTL         | 1453761_at   | 1444725_at | 0.9198 |
| TAF2    | MASTL         | 1457351_at   | 1444725_at | 0.9383 |
| ZNF69   | MASTL         | 1458274_at   | 1444725_at | 0.8423 |
| ASCL1   | CDR2L         | 1450164_at   | 1445027_at | 0.8068 |
| SALL1   | CDR2L         | 1450489_at   | 1445027_at | 0.8578 |
| ZFP2    | CDR2L         | 1452025_a_at | 1445027_at | 0.8637 |
| FOXMI   | BC023969      | 1448834_at   | 1445226_at | 0.9368 |
| SOX4    | BC023969      | 1449370_at   | 1445226_at | 0.8773 |
| SUPT16H | BC023969      | 1449578_at   | 1445226_at | 0.9380 |
| TCERG1  | BC023969      | 1450100_a_at | 1445226_at | 0.9649 |
| ASCL1   | BC023969      | 1450164_at   | 1445226_at | 0.9692 |
| ZFP354C | BC023969      | 1450321_at   | 1445226_at | 0.9528 |
| MYBL1   | BC023969      | 1450481_at   | 1445226_at | 0.8829 |
| SOX3    | BC023969      | 1450485_at   | 1445226_at | 0.9543 |
| HMGA2   | BC023969      | 1450780_s_at | 1445226_at | 0.8610 |
| ZNF451  | BC023969      | 1451816_at   | 1445226_at | 0.8568 |
| NCOR2   | BC023969      | 1451841_a_at | 1445226_at | 0.9760 |
| ZFP2    | BC023969      | 1452025_a_at | 1445226_at | 0.9526 |

|         |               |              |            |        |
|---------|---------------|--------------|------------|--------|
| ZBED3   | BC023969      | 1452088_at   | 1445226_at | 0.8056 |
| CENPF   | BC023969      | 1452334_at   | 1445226_at | 0.9453 |
| MLF1IP  | BC023969      | 1452816_at   | 1445226_at | 0.8349 |
| TTF2    | BC023969      | 1452818_at   | 1445226_at | 0.9034 |
| PHF6    | BC023969      | 1453761_at   | 1445226_at | 0.9639 |
| TAF2    | BC023969      | 1457351_at   | 1445226_at | 0.9585 |
| ZNF69   | BC023969      | 1458274_at   | 1445226_at | 0.8624 |
| FOXM1   | C530044C16RIK | 1448834_at   | 1445247_at | 0.8077 |
| SUPT16H | C530044C16RIK | 1449578_at   | 1445247_at | 0.8342 |
| TCERG1  | C530044C16RIK | 1450100_a_at | 1445247_at | 0.8454 |
| MED1    | C530044C16RIK | 1450402_at   | 1445247_at | 0.8168 |
| MYBL1   | C530044C16RIK | 1450481_at   | 1445247_at | 0.8952 |
| SOX3    | C530044C16RIK | 1450485_at   | 1445247_at | 0.8371 |
| HMGA2   | C530044C16RIK | 1450780_s_at | 1445247_at | 0.8968 |
| HMGA2   | C530044C16RIK | 1450781_at   | 1445247_at | 0.8860 |
| ZNF451  | C530044C16RIK | 1451816_at   | 1445247_at | 0.9230 |
| ZBED3   | C530044C16RIK | 1452088_at   | 1445247_at | 0.9002 |
| MLF1IP  | C530044C16RIK | 1452816_at   | 1445247_at | 0.9014 |
| TTF2    | C530044C16RIK | 1452818_at   | 1445247_at | 0.8664 |
| HELLS   | C530044C16RIK | 1453361_at   | 1445247_at | 0.8512 |
| PHF6    | C530044C16RIK | 1453761_at   | 1445247_at | 0.9015 |
| TAF2    | C530044C16RIK | 1457351_at   | 1445247_at | 0.8596 |
| FOXM1   | AV323315      | 1448834_at   | 1445298_at | 0.9316 |
| SOX4    | AV323315      | 1449370_at   | 1445298_at | 0.8138 |
| SUPT16H | AV323315      | 1449578_at   | 1445298_at | 0.8713 |
| TCERG1  | AV323315      | 1450100_a_at | 1445298_at | 0.8940 |
| ASCL1   | AV323315      | 1450164_at   | 1445298_at | 0.9453 |
| NPAS3   | AV323315      | 1450287_at   | 1445298_at | 0.8113 |
| ZFP354C | AV323315      | 1450321_at   | 1445298_at | 0.8337 |
| MYBL1   | AV323315      | 1450481_at   | 1445298_at | 0.8647 |
| SOX3    | AV323315      | 1450485_at   | 1445298_at | 0.8756 |
| HMGA2   | AV323315      | 1450780_s_at | 1445298_at | 0.9165 |
| ZNF451  | AV323315      | 1451816_at   | 1445298_at | 0.8432 |
| NCOR2   | AV323315      | 1451841_a_at | 1445298_at | 0.8590 |
| ZFP2    | AV323315      | 1452025_a_at | 1445298_at | 0.8718 |
| ZBED3   | AV323315      | 1452088_at   | 1445298_at | 0.8065 |
| CENPF   | AV323315      | 1452334_at   | 1445298_at | 0.8621 |
| MLF1IP  | AV323315      | 1452816_at   | 1445298_at | 0.8668 |
| TTF2    | AV323315      | 1452818_at   | 1445298_at | 0.8817 |
| PHF6    | AV323315      | 1453761_at   | 1445298_at | 0.9073 |
| TAF2    | AV323315      | 1457351_at   | 1445298_at | 0.9039 |
| ZNF69   | AV323315      | 1458274_at   | 1445298_at | 0.8239 |
| SALL1   | ETV1          | 1450489_at   | 1445314_at | 0.8430 |
| SUPT16H | 9330118A15RIK | 1449578_at   | 1446612_at | 0.8344 |
| MED1    | 9330118A15RIK | 1450402_at   | 1446612_at | 0.8339 |
| MYBL1   | 9330118A15RIK | 1450481_at   | 1446612_at | 0.8829 |
| HMGA2   | 9330118A15RIK | 1450780_s_at | 1446612_at | 0.8690 |
| HMGA2   | 9330118A15RIK | 1450781_at   | 1446612_at | 0.8995 |
| ZNF451  | 9330118A15RIK | 1451816_at   | 1446612_at | 0.8919 |
| ZBED3   | 9330118A15RIK | 1452088_at   | 1446612_at | 0.8648 |
| MLF1IP  | 9330118A15RIK | 1452816_at   | 1446612_at | 0.8727 |



|         |               |              |            |        |
|---------|---------------|--------------|------------|--------|
| HELLS   | 9330118A15RIK | 1453361_at   | 1446612_at | 0.8192 |
| PHF6    | 9330118A15RIK | 1453761_at   | 1446612_at | 0.8388 |
| MED1    | BE953578      | 1450402_at   | 1447298_at | 0.8652 |
| MYBL1   | BE953578      | 1450481_at   | 1447298_at | 0.8188 |
| HMGA2   | BE953578      | 1450780_s_at | 1447298_at | 0.8234 |
| HMGA2   | BE953578      | 1450781_at   | 1447298_at | 0.8406 |
| ZNF451  | BE953578      | 1451816_at   | 1447298_at | 0.8490 |
| ZBED3   | BE953578      | 1452088_at   | 1447298_at | 0.8211 |
| MLF1IP  | BE953578      | 1452816_at   | 1447298_at | 0.8357 |
| HELLS   | BE953578      | 1453361_at   | 1447298_at | 0.8082 |
| FOXM1   | KCND3         | 1448834_at   | 1447513_at | 0.9486 |
| SOX4    | KCND3         | 1449370_at   | 1447513_at | 0.8494 |
| SUPT16H | KCND3         | 1449578_at   | 1447513_at | 0.9348 |
| TCERG1  | KCND3         | 1450100_a_at | 1447513_at | 0.9771 |
| ASCL1   | KCND3         | 1450164_at   | 1447513_at | 0.9637 |
| NPAS3   | KCND3         | 1450287_at   | 1447513_at | 0.8096 |
| ZFP354C | KCND3         | 1450321_at   | 1447513_at | 0.9332 |
| MYBL1   | KCND3         | 1450481_at   | 1447513_at | 0.9240 |
| SOX3    | KCND3         | 1450485_at   | 1447513_at | 0.9574 |
| SALL1   | KCND3         | 1450489_at   | 1447513_at | 0.8259 |
| HMGA2   | KCND3         | 1450780_s_at | 1447513_at | 0.8984 |
| ZNF451  | KCND3         | 1451816_at   | 1447513_at | 0.9002 |
| NCOR2   | KCND3         | 1451841_a_at | 1447513_at | 0.9627 |
| ZFP2    | KCND3         | 1452025_a_at | 1447513_at | 0.9440 |
| ZBED3   | KCND3         | 1452088_at   | 1447513_at | 0.8512 |
| CENPF   | KCND3         | 1452334_at   | 1447513_at | 0.9291 |
| MLF1IP  | KCND3         | 1452816_at   | 1447513_at | 0.8817 |
| TTF2    | KCND3         | 1452818_at   | 1447513_at | 0.9432 |
| HELLS   | KCND3         | 1453361_at   | 1447513_at | 0.8457 |
| PHF6    | KCND3         | 1453761_at   | 1447513_at | 0.9811 |
| TAF2    | KCND3         | 1457351_at   | 1447513_at | 0.9770 |
| ZNF69   | KCND3         | 1458274_at   | 1447513_at | 0.8929 |
| FOXM1   | SEMA6D        | 1448834_at   | 1448060_at | 0.8953 |
| SUPT16H | SEMA6D        | 1449578_at   | 1448060_at | 0.8363 |
| TCERG1  | SEMA6D        | 1450100_a_at | 1448060_at | 0.8878 |
| ASCL1   | SEMA6D        | 1450164_at   | 1448060_at | 0.8827 |
| NPAS3   | SEMA6D        | 1450287_at   | 1448060_at | 0.8528 |
| ZFP354C | SEMA6D        | 1450321_at   | 1448060_at | 0.8674 |
| MYBL1   | SEMA6D        | 1450481_at   | 1448060_at | 0.8449 |
| SOX3    | SEMA6D        | 1450485_at   | 1448060_at | 0.8901 |
| HMGA2   | SEMA6D        | 1450780_s_at | 1448060_at | 0.8094 |
| ZNF451  | SEMA6D        | 1451816_at   | 1448060_at | 0.8173 |
| NCOR2   | SEMA6D        | 1451841_a_at | 1448060_at | 0.9019 |
| ZFP2    | SEMA6D        | 1452025_a_at | 1448060_at | 0.8734 |
| CENPF   | SEMA6D        | 1452334_at   | 1448060_at | 0.8616 |
| MLF1IP  | SEMA6D        | 1452816_at   | 1448060_at | 0.8035 |
| TTF2    | SEMA6D        | 1452818_at   | 1448060_at | 0.8813 |
| PHF6    | SEMA6D        | 1453761_at   | 1448060_at | 0.8988 |
| TAF2    | SEMA6D        | 1457351_at   | 1448060_at | 0.8954 |
| ZNF69   | SEMA6D        | 1458274_at   | 1448060_at | 0.8216 |
| TEAD2   | SHC3          | 1448519_at   | 1450326_at | 0.8214 |

|         |               |              |              |        |
|---------|---------------|--------------|--------------|--------|
| TEAD2   | 4930422N03RIK | 1448519_at   | 1453375_at   | 0.8000 |
| TEAD2   | 5730471H19RIK | 1448519_at   | 1455038_at   | 0.8351 |
| TEAD2   | TNC           | 1448519_at   | 1456344_at   | 0.8640 |
| FOXM1   | OGG1          | 1448834_at   | 1448815_at   | 0.8948 |
| SUPT16H | OGG1          | 1449578_at   | 1448815_at   | 0.9110 |
| TCERG1  | OGG1          | 1450100_a_at | 1448815_at   | 0.9555 |
| ASCL1   | OGG1          | 1450164_at   | 1448815_at   | 0.9064 |
| ZFP354C | OGG1          | 1450321_at   | 1448815_at   | 0.8533 |
| MED1    | OGG1          | 1450402_at   | 1448815_at   | 0.8784 |
| MYBL1   | OGG1          | 1450481_at   | 1448815_at   | 0.9541 |
| SOX3    | OGG1          | 1450485_at   | 1448815_at   | 0.9631 |
| SALL1   | OGG1          | 1450489_at   | 1448815_at   | 0.8934 |
| HMGA2   | OGG1          | 1450780_s_at | 1448815_at   | 0.9497 |
| HMGA2   | OGG1          | 1450781_at   | 1448815_at   | 0.8928 |
| ZNF451  | OGG1          | 1451816_at   | 1448815_at   | 0.9489 |
| NCOR2   | OGG1          | 1451841_a_at | 1448815_at   | 0.8776 |
| ZFP2    | OGG1          | 1452025_a_at | 1448815_at   | 0.8886 |
| ZBED3   | OGG1          | 1452088_at   | 1448815_at   | 0.9443 |
| CENPF   | OGG1          | 1452334_at   | 1448815_at   | 0.8310 |
| MLF1IP  | OGG1          | 1452816_at   | 1448815_at   | 0.9230 |
| TTF2    | OGG1          | 1452818_at   | 1448815_at   | 0.9572 |
| HELLS   | OGG1          | 1453361_at   | 1448815_at   | 0.8873 |
| PHF6    | OGG1          | 1453761_at   | 1448815_at   | 0.9561 |
| TAF2    | OGG1          | 1457351_at   | 1448815_at   | 0.9687 |
| ZNF69   | OGG1          | 1458274_at   | 1448815_at   | 0.8718 |
| FOXM1   | SKP2          | 1448834_at   | 1449293_a_at | 0.9395 |
| FOXM1   | SOX4          | 1448834_at   | 1449370_at   | 0.8409 |
| FOXM1   | SUPT16H       | 1448834_at   | 1449578_at   | 0.8950 |
| FOXM1   | CCNB1         | 1448834_at   | 1449675_at   | 0.9255 |
| FOXM1   | LFNG          | 1448834_at   | 1449943_at   | 0.9055 |
| FOXM1   | APC           | 1448834_at   | 1450056_at   | 0.8759 |
| FOXM1   | 4933411K20RIK | 1448834_at   | 1450076_at   | 0.9230 |
| FOXM1   | TCERG1        | 1448834_at   | 1450100_a_at | 0.9271 |
| FOXM1   | ASCL1         | 1448834_at   | 1450164_at   | 0.9428 |
| FOXM1   | PCDHB11       | 1448834_at   | 1450270_at   | 0.8146 |
| FOXM1   | NPAS3         | 1448834_at   | 1450287_at   | 0.8404 |
| FOXM1   | ZFP354C       | 1448834_at   | 1450321_at   | 0.9063 |
| FOXM1   | SHC3          | 1448834_at   | 1450326_at   | 0.8827 |
| FOXM1   | MYBL1         | 1448834_at   | 1450481_at   | 0.8723 |
| FOXM1   | SOX3          | 1448834_at   | 1450485_at   | 0.9252 |
| FOXM1   | SALL1         | 1448834_at   | 1450489_at   | 0.8193 |
| FOXM1   | HMGA2         | 1448834_at   | 1450780_s_at | 0.8790 |
| FOXM1   | ZNF451        | 1448834_at   | 1451816_at   | 0.8504 |
| FOXM1   | NCOR2         | 1448834_at   | 1451841_a_at | 0.9245 |
| FOXM1   | LMNB2         | 1448834_at   | 1451849_a_at | 0.8583 |
| FOXM1   | ZFP2          | 1448834_at   | 1452025_a_at | 0.9154 |
| FOXM1   | 6720460F02RIK | 1448834_at   | 1452073_at   | 0.9788 |
| FOXM1   | ZBED3         | 1448834_at   | 1452088_at   | 0.8125 |
| FOXM1   | RRP1B         | 1448834_at   | 1452119_at   | 0.8986 |
| FOXM1   | NOVA1         | 1448834_at   | 1452245_at   | 0.8454 |
| FOXM1   | CENPF         | 1448834_at   | 1452334_at   | 0.8925 |

|         |                       |              |                       |        |
|---------|-----------------------|--------------|-----------------------|--------|
| FOXM1   | 4930427A07RIK         | 1448834_at   | 1452337_at            | 0.8606 |
| FOXM1   | ADAMTS7               | 1448834_at   | 1452339_at            | 0.8481 |
| FOXM1   | ASPM                  | 1448834_at   | 1452459_at            | 0.9422 |
| FOXM1   | MLF1IP                | 1448834_at   | 1452816_at            | 0.8508 |
| FOXM1   | TTF2                  | 1448834_at   | 1452818_at            | 0.9297 |
| FOXM1   | TMEM138               | 1448834_at   | 1452978_at            | 0.8547 |
| FOXM1   | RHOBTB3               | 1448834_at   | 1453227_at            | 0.9464 |
| FOXM1   | TROAP                 | 1448834_at   | 1453370_at            | 0.9285 |
| FOXM1   | CEP55                 | 1448834_at   | 1453683_a_at          | 0.9231 |
| FOXM1   | DHX38                 | 1448834_at   | 1453751_at            | 0.9371 |
| FOXM1   | PHF6                  | 1448834_at   | 1453761_at            | 0.9263 |
| FOXM1   | FAM110A               | 1448834_at   | 1453768_a_at          | 0.8520 |
| FOXM1   | NETO2                 | 1448834_at   | 1454032_at            | 0.9013 |
| FOXM1   | CCDC77                | 1448834_at   | 1454228_a_at          | 0.8795 |
| FOXM1   | EXOD1                 | 1448834_at   | 1454229_a_at          | 0.9418 |
| FOXM1   | XKR5                  | 1448834_at   | 1455127_at            | 0.8232 |
| FOXM1   | UTP23                 | 1448834_at   | 1455259_a_at          | 0.9033 |
| FOXM1   | ATP5G2                | 1448834_at   | 1456128_at            | 0.8646 |
| FOXM1   | 2700049P18RIK         | 1448834_at   | 1456163_at            | 0.8843 |
| FOXM1   | RTEL1                 | 1448834_at   | 1456729_x_at          | 0.8360 |
| FOXM1   | BB053540              | 1448834_at   | 1456840_at            | 0.8908 |
| FOXM1   | BM235636              | 1448834_at   | 1456853_at            | 0.8001 |
| FOXM1   | AV254764              | 1448834_at   | 1456951_at            | 0.8684 |
| FOXM1   | NETO2                 | 1448834_at   | 1457344_at            | 0.8054 |
| FOXM1   | TAF2                  | 1448834_at   | 1457351_at            | 0.9303 |
| FOXM1   | ADAMTS6               | 1448834_at   | 1457548_at            | 0.8220 |
| FOXM1   | ZNF69                 | 1448834_at   | 1458274_at            | 0.8546 |
| FOXM1   | MTR                   | 1448834_at   | 1458532_at            | 0.8310 |
| FOXM1   | RNF219                | 1448834_at   | 1458636_at            | 0.9288 |
| FOXM1   | BB463474              | 1448834_at   | 1458902_at            | 0.8046 |
| FOXM1   | 6530418L21RIK         | 1448834_at   | 1459051_at            | 0.8668 |
| FOXM1   | AFFX-DapX-5_at        | 1448834_at   | AFFX-DapX-5_at        | 0.8975 |
| FOXM1   | AFFX-LysX-5_at        | 1448834_at   | AFFX-LysX-5_at        | 0.8303 |
| FOXM1   | AFFX-PheX-5_at        | 1448834_at   | AFFX-PheX-5_at        | 0.8082 |
| FOXM1   | AFFX-r2-Bs-dap-5_at   | 1448834_at   | AFFX-r2-Bs-dap-5_at   | 0.8868 |
| FOXM1   | AFFX-r2-Bs-lys-5_at   | 1448834_at   | AFFX-r2-Bs-lys-5_at   | 0.8860 |
| FOXM1   | AFFX-r2-Bs-thr-5_s_at | 1448834_at   | AFFX-r2-Bs-thr-5_s_at | 0.8694 |
| FOXM1   | AFFX-ThrX-5_at        | 1448834_at   | AFFX-ThrX-5_at        | 0.8766 |
| SOX4    | SKP2                  | 1449370_at   | 1449293_a_at          | 0.8382 |
| SUPT16H | SKP2                  | 1449578_at   | 1449293_a_at          | 0.9494 |
| TCERG1  | SKP2                  | 1450100_a_at | 1449293_a_at          | 0.9898 |
| ASCL1   | SKP2                  | 1450164_at   | 1449293_a_at          | 0.9561 |
| ZFP354C | SKP2                  | 1450321_at   | 1449293_a_at          | 0.9073 |
| MED1    | SKP2                  | 1450402_at   | 1449293_a_at          | 0.8311 |
| MYBL1   | SKP2                  | 1450481_at   | 1449293_a_at          | 0.9565 |
| SOX3    | SKP2                  | 1450485_at   | 1449293_a_at          | 0.9643 |
| SALL1   | SKP2                  | 1450489_at   | 1449293_a_at          | 0.8457 |
| HMGA2   | SKP2                  | 1450780_s_at | 1449293_a_at          | 0.9319 |
| HMGA2   | SKP2                  | 1450781_at   | 1449293_a_at          | 0.8409 |
| ZNF451  | SKP2                  | 1451816_at   | 1449293_a_at          | 0.9330 |
| NCOR2   | SKP2                  | 1451841_a_at | 1449293_a_at          | 0.9408 |

|         |               |            |              |        |
|---------|---------------|------------|--------------|--------|
| ZFP2    | SKP2          | 1452025_at | 1449293_at   | 0.9376 |
| ZBED3   | SKP2          | 1452088_at | 1449293_at   | 0.8940 |
| CENPF   | SKP2          | 1452334_at | 1449293_at   | 0.9246 |
| MLF1IP  | SKP2          | 1452816_at | 1449293_at   | 0.9190 |
| TTF2    | SKP2          | 1452818_at | 1449293_at   | 0.9593 |
| HELLS   | SKP2          | 1453361_at | 1449293_at   | 0.8588 |
| PHF6    | SKP2          | 1453761_at | 1449293_at   | 0.9934 |
| TAF2    | SKP2          | 1457351_at | 1449293_at   | 0.9919 |
| ZNF69   | SKP2          | 1458274_at | 1449293_at   | 0.9024 |
| SOX4    | SUPT16H       | 1449370_at | 1449578_at   | 0.8772 |
| SOX4    | CCNB1         | 1449370_at | 1449675_at   | 0.8289 |
| SOX4    | LFNG          | 1449370_at | 1449943_at   | 0.8190 |
| SOX4    | 4933411K20RIK | 1449370_at | 1450076_at   | 0.8329 |
| SOX4    | TCERG1        | 1449370_at | 1450100_a_at | 0.8472 |
| SOX4    | ASCL1         | 1449370_at | 1450164_at   | 0.8796 |
| SOX4    | ZFP354C       | 1449370_at | 1450321_at   | 0.8384 |
| SOX4    | SOX3          | 1449370_at | 1450485_at   | 0.8243 |
| SOX4    | PA2G4         | 1449370_at | 1450854_at   | 0.8361 |
| SOX4    | NCOR2         | 1449370_at | 1451841_a_at | 0.8459 |
| SOX4    | ZFP2          | 1449370_at | 1452025_a_at | 0.8631 |
| SOX4    | 6720460F02RIK | 1449370_at | 1452073_at   | 0.8552 |
| SOX4    | NOVA1         | 1449370_at | 1452245_at   | 0.8388 |
| SOX4    | PVT1          | 1449370_at | 1452324_at   | 0.8258 |
| SOX4    | CENPF         | 1449370_at | 1452334_at   | 0.8327 |
| SOX4    | ADAMTS7       | 1449370_at | 1452339_at   | 0.8516 |
| SOX4    | ASPM          | 1449370_at | 1452459_at   | 0.8361 |
| SOX4    | RHOBTB3       | 1449370_at | 1453227_at   | 0.8604 |
| SOX4    | TROAP         | 1449370_at | 1453370_at   | 0.8126 |
| SOX4    | CEP55         | 1449370_at | 1453683_a_at | 0.8156 |
| SOX4    | DHX38         | 1449370_at | 1453751_at   | 0.8347 |
| SOX4    | PHF6          | 1449370_at | 1453761_at   | 0.8263 |
| SOX4    | FAM110A       | 1449370_at | 1453768_a_at | 0.8069 |
| SOX4    | NETO2         | 1449370_at | 1454032_at   | 0.8998 |
| SOX4    | EXOD1         | 1449370_at | 1454229_a_at | 0.8475 |
| SOX4    | AV254764      | 1449370_at | 1456951_at   | 0.8103 |
| SOX4    | PLDN          | 1449370_at | 1457088_at   | 0.8050 |
| SOX4    | TAF2          | 1449370_at | 1457351_at   | 0.8254 |
| SOX4    | RNF219        | 1449370_at | 1458636_at   | 0.8180 |
| SOX4    | 6530418L21RIK | 1449370_at | 1459051_at   | 0.8050 |
| SUPT16H | CCNB1         | 1449578_at | 1449675_at   | 0.9393 |
| SUPT16H | LFNG          | 1449578_at | 1449943_at   | 0.8313 |
| SUPT16H | APC           | 1449578_at | 1450056_at   | 0.8121 |
| SUPT16H | 4933411K20RIK | 1449578_at | 1450076_at   | 0.9448 |
| SUPT16H | TCERG1        | 1449578_at | 1450100_a_at | 0.9618 |
| SUPT16H | ASCL1         | 1449578_at | 1450164_at   | 0.9075 |
| SUPT16H | ZFP354C       | 1449578_at | 1450321_at   | 0.8564 |
| SUPT16H | MED1          | 1449578_at | 1450402_at   | 0.8088 |
| SUPT16H | MYBL1         | 1449578_at | 1450481_at   | 0.9226 |
| SUPT16H | SOX3          | 1449578_at | 1450485_at   | 0.9264 |
| SUPT16H | SALL1         | 1449578_at | 1450489_at   | 0.8021 |
| SUPT16H | HMG2          | 1449578_at | 1450780_s_at | 0.9042 |

|         |                |              |                |        |
|---------|----------------|--------------|----------------|--------|
| SUPT16H | HMGA2          | 1449578_at   | 1450781_at     | 0.8302 |
| SUPT16H | ZNF451         | 1449578_at   | 1451816_at     | 0.9086 |
| SUPT16H | NCOR2          | 1449578_at   | 1451841_a_at   | 0.8893 |
| SUPT16H | LMNB2          | 1449578_at   | 1451849_a_at   | 0.8729 |
| SUPT16H | ZFP2           | 1449578_at   | 1452025_a_at   | 0.9074 |
| SUPT16H | 6720460F02RIK  | 1449578_at   | 1452073_at     | 0.8942 |
| SUPT16H | ZBED3          | 1449578_at   | 1452088_at     | 0.8739 |
| SUPT16H | RRP1B          | 1449578_at   | 1452119_at     | 0.8556 |
| SUPT16H | NOVA1          | 1449578_at   | 1452245_at     | 0.8323 |
| SUPT16H | CENPF          | 1449578_at   | 1452334_at     | 0.8589 |
| SUPT16H | ASPM           | 1449578_at   | 1452459_at     | 0.9166 |
| SUPT16H | MLF1IP         | 1449578_at   | 1452816_at     | 0.8858 |
| SUPT16H | TTF2           | 1449578_at   | 1452818_at     | 0.8930 |
| SUPT16H | TMEM138        | 1449578_at   | 1452978_at     | 0.8478 |
| SUPT16H | RHOBTB3        | 1449578_at   | 1453227_at     | 0.9329 |
| SUPT16H | HELLS          | 1449578_at   | 1453361_at     | 0.8213 |
| SUPT16H | TROAP          | 1449578_at   | 1453370_at     | 0.9444 |
| SUPT16H | CEP55          | 1449578_at   | 1453683_a_at   | 0.9484 |
| SUPT16H | DHX38          | 1449578_at   | 1453751_at     | 0.9108 |
| SUPT16H | PHF6           | 1449578_at   | 1453761_at     | 0.9474 |
| SUPT16H | FAM110A        | 1449578_at   | 1453768_a_at   | 0.8163 |
| SUPT16H | NETO2          | 1449578_at   | 1454032_at     | 0.9030 |
| SUPT16H | CCDC77         | 1449578_at   | 1454228_a_at   | 0.9183 |
| SUPT16H | EXOD1          | 1449578_at   | 1454229_a_at   | 0.9437 |
| SUPT16H | UTP23          | 1449578_at   | 1455259_a_at   | 0.9300 |
| SUPT16H | 2700049P18RIK  | 1449578_at   | 1456163_at     | 0.9018 |
| SUPT16H | RTEL1          | 1449578_at   | 1456729_x_at   | 0.8461 |
| SUPT16H | AV254764       | 1449578_at   | 1456951_at     | 0.8867 |
| SUPT16H | NETO2          | 1449578_at   | 1457344_at     | 0.8014 |
| SUPT16H | TAF2           | 1449578_at   | 1457351_at     | 0.9425 |
| SUPT16H | ZNF69          | 1449578_at   | 1458274_at     | 0.8512 |
| SUPT16H | MTR            | 1449578_at   | 1458532_at     | 0.8909 |
| SUPT16H | RNF219         | 1449578_at   | 1458636_at     | 0.9414 |
| SUPT16H | BB463474       | 1449578_at   | 1458902_at     | 0.8474 |
| SUPT16H | AFFX-DapX-5_at | 1449578_at   | AFFX-DapX-5_at | 0.8036 |
| TCERG1  | CCNB1          | 1450100_a_at | 1449675_at     | 0.9893 |
| ASCL1   | CCNB1          | 1450164_at   | 1449675_at     | 0.9377 |
| ZFP354C | CCNB1          | 1450321_at   | 1449675_at     | 0.8896 |
| MED1    | CCNB1          | 1450402_at   | 1449675_at     | 0.8354 |
| MYBL1   | CCNB1          | 1450481_at   | 1449675_at     | 0.9627 |
| SOX3    | CCNB1          | 1450485_at   | 1449675_at     | 0.9491 |
| SALL1   | CCNB1          | 1450489_at   | 1449675_at     | 0.8494 |
| HMGA2   | CCNB1          | 1450780_s_at | 1449675_at     | 0.9312 |
| HMGA2   | CCNB1          | 1450781_at   | 1449675_at     | 0.8498 |
| ZNF451  | CCNB1          | 1451816_at   | 1449675_at     | 0.9263 |
| NCOR2   | CCNB1          | 1451841_a_at | 1449675_at     | 0.9143 |
| ZFP2    | CCNB1          | 1452025_a_at | 1449675_at     | 0.9203 |
| ZBED3   | CCNB1          | 1452088_at   | 1449675_at     | 0.9045 |
| CENPF   | CCNB1          | 1452334_at   | 1449675_at     | 0.9054 |
| MLF1IP  | CCNB1          | 1452816_at   | 1449675_at     | 0.9089 |
| TTF2    | CCNB1          | 1452818_at   | 1449675_at     | 0.9546 |

|         |               |              |            |        |
|---------|---------------|--------------|------------|--------|
| HELLS   | CCNB1         | 1453361_at   | 1449675_at | 0.8429 |
| PHF6    | CCNB1         | 1453761_at   | 1449675_at | 0.9888 |
| TAF2    | CCNB1         | 1457351_at   | 1449675_at | 0.9913 |
| ZNF69   | CCNB1         | 1458274_at   | 1449675_at | 0.9131 |
| TCERG1  | LFNG          | 1450100_a_at | 1449943_at | 0.8703 |
| ASCL1   | LFNG          | 1450164_at   | 1449943_at | 0.9021 |
| ZFP354C | LFNG          | 1450321_at   | 1449943_at | 0.9488 |
| SOX3    | LFNG          | 1450485_at   | 1449943_at | 0.9258 |
| NCOR2   | LFNG          | 1451841_a_at | 1449943_at | 0.9588 |
| ZFP2    | LFNG          | 1452025_a_at | 1449943_at | 0.8763 |
| CENPF   | LFNG          | 1452334_at   | 1449943_at | 0.8567 |
| TTF2    | LFNG          | 1452818_at   | 1449943_at | 0.8502 |
| PHF6    | LFNG          | 1453761_at   | 1449943_at | 0.8568 |
| TAF2    | LFNG          | 1457351_at   | 1449943_at | 0.8760 |
| TCERG1  | APC           | 1450100_a_at | 1450056_at | 0.8846 |
| ASCL1   | APC           | 1450164_at   | 1450056_at | 0.8452 |
| NPAS3   | APC           | 1450287_at   | 1450056_at | 0.8325 |
| ZFP354C | APC           | 1450321_at   | 1450056_at | 0.8412 |
| MYBL1   | APC           | 1450481_at   | 1450056_at | 0.8320 |
| SOX3    | APC           | 1450485_at   | 1450056_at | 0.8596 |
| SALL1   | APC           | 1450489_at   | 1450056_at | 0.8198 |
| ZNF451  | APC           | 1451816_at   | 1450056_at | 0.8011 |
| NCOR2   | APC           | 1451841_a_at | 1450056_at | 0.8525 |
| ZFP2    | APC           | 1452025_a_at | 1450056_at | 0.8506 |
| CENPF   | APC           | 1452334_at   | 1450056_at | 0.8452 |
| TTF2    | APC           | 1452818_at   | 1450056_at | 0.8733 |
| PHF6    | APC           | 1453761_at   | 1450056_at | 0.8742 |
| TAF2    | APC           | 1457351_at   | 1450056_at | 0.8917 |
| ZNF69   | APC           | 1458274_at   | 1450056_at | 0.8315 |
| TCERG1  | 4933411K20RIK | 1450100_a_at | 1450076_at | 0.9808 |
| ASCL1   | 4933411K20RIK | 1450164_at   | 1450076_at | 0.9430 |
| ZFP354C | 4933411K20RIK | 1450321_at   | 1450076_at | 0.8703 |
| MED1    | 4933411K20RIK | 1450402_at   | 1450076_at | 0.8251 |
| MYBL1   | 4933411K20RIK | 1450481_at   | 1450076_at | 0.9590 |
| SOX3    | 4933411K20RIK | 1450485_at   | 1450076_at | 0.9400 |
| SALL1   | 4933411K20RIK | 1450489_at   | 1450076_at | 0.8380 |
| HMGA2   | 4933411K20RIK | 1450780_s_at | 1450076_at | 0.9290 |
| HMGA2   | 4933411K20RIK | 1450781_at   | 1450076_at | 0.8389 |
| ZNF451  | 4933411K20RIK | 1451816_at   | 1450076_at | 0.9221 |
| NCOR2   | 4933411K20RIK | 1451841_a_at | 1450076_at | 0.9227 |
| ZFP2    | 4933411K20RIK | 1452025_a_at | 1450076_at | 0.9237 |
| ZBED3   | 4933411K20RIK | 1452088_at   | 1450076_at | 0.8827 |
| CENPF   | 4933411K20RIK | 1452334_at   | 1450076_at | 0.9312 |
| MLF1IP  | 4933411K20RIK | 1452816_at   | 1450076_at | 0.9196 |
| TTF2    | 4933411K20RIK | 1452818_at   | 1450076_at | 0.9485 |
| HELLS   | 4933411K20RIK | 1453361_at   | 1450076_at | 0.8330 |
| PHF6    | 4933411K20RIK | 1453761_at   | 1450076_at | 0.9928 |
| TAF2    | 4933411K20RIK | 1457351_at   | 1450076_at | 0.9807 |
| ZNF69   | 4933411K20RIK | 1458274_at   | 1450076_at | 0.8999 |
| TCERG1  | ASCL1         | 1450100_a_at | 1450164_at | 0.9395 |
| TCERG1  | ZFP354C       | 1450100_a_at | 1450321_at | 0.9095 |

|        |                       |              |                       |        |
|--------|-----------------------|--------------|-----------------------|--------|
| TCERG1 | SHC3                  | 1450100_a_at | 1450326_at            | 0.8277 |
| TCERG1 | MED1                  | 1450100_a_at | 1450402_at            | 0.8445 |
| TCERG1 | MYBL1                 | 1450100_a_at | 1450481_at            | 0.9572 |
| TCERG1 | SOX3                  | 1450100_a_at | 1450485_at            | 0.9607 |
| TCERG1 | SALL1                 | 1450100_a_at | 1450489_at            | 0.8447 |
| TCERG1 | HMGA2                 | 1450100_a_at | 1450780_s_at          | 0.9280 |
| TCERG1 | HMGA2                 | 1450100_a_at | 1450781_at            | 0.8485 |
| TCERG1 | ZNF451                | 1450100_a_at | 1451816_at            | 0.9303 |
| TCERG1 | NCOR2                 | 1450100_a_at | 1451841_a_at          | 0.9236 |
| TCERG1 | LMNB2                 | 1450100_a_at | 1451849_a_at          | 0.8923 |
| TCERG1 | ZFP2                  | 1450100_a_at | 1452025_a_at          | 0.9320 |
| TCERG1 | 6720460F02RIK         | 1450100_a_at | 1452073_at            | 0.9199 |
| TCERG1 | ZBED3                 | 1450100_a_at | 1452088_at            | 0.9024 |
| TCERG1 | RRP1B                 | 1450100_a_at | 1452119_at            | 0.9086 |
| TCERG1 | NOVA1                 | 1450100_a_at | 1452245_at            | 0.8335 |
| TCERG1 | PVT1                  | 1450100_a_at | 1452324_at            | 0.8015 |
| TCERG1 | CENPF                 | 1450100_a_at | 1452334_at            | 0.9074 |
| TCERG1 | ASPM                  | 1450100_a_at | 1452459_at            | 0.9516 |
| TCERG1 | AAK1                  | 1450100_a_at | 1452632_at            | 0.8105 |
| TCERG1 | MLF1IP                | 1450100_a_at | 1452816_at            | 0.9077 |
| TCERG1 | TTF2                  | 1450100_a_at | 1452818_at            | 0.9540 |
| TCERG1 | TMEM138               | 1450100_a_at | 1452978_at            | 0.9053 |
| TCERG1 | RHOBTB3               | 1450100_a_at | 1453227_at            | 0.9726 |
| TCERG1 | HELLS                 | 1450100_a_at | 1453361_at            | 0.8587 |
| TCERG1 | TROAP                 | 1450100_a_at | 1453370_at            | 0.9803 |
| TCERG1 | CEP55                 | 1450100_a_at | 1453683_a_at          | 0.9813 |
| TCERG1 | DHX38                 | 1450100_a_at | 1453751_at            | 0.9632 |
| TCERG1 | PHF6                  | 1450100_a_at | 1453761_at            | 0.9816 |
| TCERG1 | FAM110A               | 1450100_a_at | 1453768_a_at          | 0.8536 |
| TCERG1 | NETO2                 | 1450100_a_at | 1454032_at            | 0.8954 |
| TCERG1 | CCDC77                | 1450100_a_at | 1454228_a_at          | 0.9450 |
| TCERG1 | EXOD1                 | 1450100_a_at | 1454229_a_at          | 0.9810 |
| TCERG1 | XKR5                  | 1450100_a_at | 1455127_at            | 0.8192 |
| TCERG1 | UTP23                 | 1450100_a_at | 1455259_a_at          | 0.9727 |
| TCERG1 | 2700049P18RIK         | 1450100_a_at | 1456163_at            | 0.9509 |
| TCERG1 | RTEL1                 | 1450100_a_at | 1456729_x_at          | 0.8753 |
| TCERG1 | BB053540              | 1450100_a_at | 1456840_at            | 0.8449 |
| TCERG1 | AV254764              | 1450100_a_at | 1456951_at            | 0.8977 |
| TCERG1 | TAF2                  | 1450100_a_at | 1457351_at            | 0.9909 |
| TCERG1 | ZNF69                 | 1450100_a_at | 1458274_at            | 0.9187 |
| TCERG1 | MTR                   | 1450100_a_at | 1458532_at            | 0.9157 |
| TCERG1 | RNF219                | 1450100_a_at | 1458636_at            | 0.9738 |
| TCERG1 | BB463474              | 1450100_a_at | 1458902_at            | 0.8568 |
| TCERG1 | 6530418L21RIK         | 1450100_a_at | 1459051_at            | 0.8318 |
| TCERG1 | AA763515              | 1450100_a_at | 1460065_at            | 0.8151 |
| TCERG1 | AFFX-DapX-5_at        | 1450100_a_at | AFFX-DapX-5_at        | 0.8830 |
| TCERG1 | AFFX-LysX-5_at        | 1450100_a_at | AFFX-LysX-5_at        | 0.8618 |
| TCERG1 | AFFX-r2-Bs-dap-5_at   | 1450100_a_at | AFFX-r2-Bs-dap-5_at   | 0.8722 |
| TCERG1 | AFFX-r2-Bs-lys-5_at   | 1450100_a_at | AFFX-r2-Bs-lys-5_at   | 0.8737 |
| TCERG1 | AFFX-r2-Bs-thr-5_s_at | 1450100_a_at | AFFX-r2-Bs-thr-5_s_at | 0.8643 |
| TCERG1 | AFFX-ThrX-5_at        | 1450100_a_at | AFFX-ThrX-5_at        | 0.8663 |

|       |                       |            |                       |        |
|-------|-----------------------|------------|-----------------------|--------|
| ASCL1 | PCDHB11               | 1450164_at | 1450270_at            | 0.8259 |
| ASCL1 | NPAS3                 | 1450164_at | 1450287_at            | 0.8012 |
| ASCL1 | ZFP354C               | 1450164_at | 1450321_at            | 0.9258 |
| ASCL1 | SHC3                  | 1450164_at | 1450326_at            | 0.8593 |
| ASCL1 | MYBL1                 | 1450164_at | 1450481_at            | 0.8724 |
| ASCL1 | SOX3                  | 1450164_at | 1450485_at            | 0.9372 |
| ASCL1 | HMGA2                 | 1450164_at | 1450780_s_at          | 0.8991 |
| ASCL1 | ZNF451                | 1450164_at | 1451816_at            | 0.8484 |
| ASCL1 | NCOR2                 | 1450164_at | 1451841_a_at          | 0.9511 |
| ASCL1 | LMNB2                 | 1450164_at | 1451849_a_at          | 0.8615 |
| ASCL1 | ZFP2                  | 1450164_at | 1452025_a_at          | 0.9453 |
| ASCL1 | 6720460F02RIK         | 1450164_at | 1452073_at            | 0.9583 |
| ASCL1 | ZBED3                 | 1450164_at | 1452088_at            | 0.8012 |
| ASCL1 | RRP1B                 | 1450164_at | 1452119_at            | 0.8858 |
| ASCL1 | NOVA1                 | 1450164_at | 1452245_at            | 0.9406 |
| ASCL1 | CENPF                 | 1450164_at | 1452334_at            | 0.9311 |
| ASCL1 | 4930427A07RIK         | 1450164_at | 1452337_at            | 0.8105 |
| ASCL1 | ADAMTS7               | 1450164_at | 1452339_at            | 0.8914 |
| ASCL1 | ASPM                  | 1450164_at | 1452459_at            | 0.9558 |
| ASCL1 | MLF1IP                | 1450164_at | 1452816_at            | 0.8297 |
| ASCL1 | TTF2                  | 1450164_at | 1452818_at            | 0.9090 |
| ASCL1 | TMEM138               | 1450164_at | 1452978_at            | 0.8529 |
| ASCL1 | RHOBTB3               | 1450164_at | 1453227_at            | 0.9684 |
| ASCL1 | CALR3                 | 1450164_at | 1453232_at            | 0.8441 |
| ASCL1 | TROAP                 | 1450164_at | 1453370_at            | 0.9339 |
| ASCL1 | CEP55                 | 1450164_at | 1453683_a_at          | 0.9376 |
| ASCL1 | DHX38                 | 1450164_at | 1453751_at            | 0.9340 |
| ASCL1 | PHF6                  | 1450164_at | 1453761_at            | 0.9437 |
| ASCL1 | FAM110A               | 1450164_at | 1453768_a_at          | 0.8995 |
| ASCL1 | NETO2                 | 1450164_at | 1454032_at            | 0.9009 |
| ASCL1 | CCDC77                | 1450164_at | 1454228_a_at          | 0.8859 |
| ASCL1 | EXOD1                 | 1450164_at | 1454229_a_at          | 0.9658 |
| ASCL1 | XKR5                  | 1450164_at | 1455127_at            | 0.8796 |
| ASCL1 | UTP23                 | 1450164_at | 1455259_a_at          | 0.9171 |
| ASCL1 | ATP5G2                | 1450164_at | 1456128_at            | 0.8638 |
| ASCL1 | 2700049P18RIK         | 1450164_at | 1456163_at            | 0.8997 |
| ASCL1 | BB053540              | 1450164_at | 1456840_at            | 0.8740 |
| ASCL1 | AV254764              | 1450164_at | 1456951_at            | 0.9025 |
| ASCL1 | TAF2                  | 1450164_at | 1457351_at            | 0.9377 |
| ASCL1 | ZNF69                 | 1450164_at | 1458274_at            | 0.8504 |
| ASCL1 | MTR                   | 1450164_at | 1458532_at            | 0.8187 |
| ASCL1 | BM224051              | 1450164_at | 1458630_at            | 0.8068 |
| ASCL1 | RNF219                | 1450164_at | 1458636_at            | 0.9484 |
| ASCL1 | BB463474              | 1450164_at | 1458902_at            | 0.8004 |
| ASCL1 | 6530418L21RIK         | 1450164_at | 1459051_at            | 0.9093 |
| ASCL1 | BB527979              | 1450164_at | 1459950_at            | 0.8410 |
| ASCL1 | AFFX-DapX-5_at        | 1450164_at | AFFX-DapX-5_at        | 0.8903 |
| ASCL1 | AFFX-LysX-5_at        | 1450164_at | AFFX-LysX-5_at        | 0.8427 |
| ASCL1 | AFFX-r2-Bs-dap-5_at   | 1450164_at | AFFX-r2-Bs-dap-5_at   | 0.8753 |
| ASCL1 | AFFX-r2-Bs-lys-5_at   | 1450164_at | AFFX-r2-Bs-lys-5_at   | 0.8656 |
| ASCL1 | AFFX-r2-Bs-thr-5_s_at | 1450164_at | AFFX-r2-Bs-thr-5_s_at | 0.8685 |



|         |                       |              |                       |        |
|---------|-----------------------|--------------|-----------------------|--------|
| ASCL1   | AFFX-ThrX-5_at        | 1450164_at   | AFFX-ThrX-5_at        | 0.8760 |
| ZFP354C | PCDHB11               | 1450321_at   | 1450270_at            | 0.8303 |
| NCOR2   | PCDHB11               | 1451841_a_at | 1450270_at            | 0.8777 |
| ZFP2    | PCDHB11               | 1452025_a_at | 1450270_at            | 0.8830 |
| CENPF   | PCDHB11               | 1452334_at   | 1450270_at            | 0.8586 |
| NPAS3   | SHC3                  | 1450287_at   | 1450326_at            | 0.8965 |
| NPAS3   | MYO10                 | 1450287_at   | 1450651_at            | 0.8406 |
| NPAS3   | 6720460F02RIK         | 1450287_at   | 1452073_at            | 0.8411 |
| NPAS3   | AAK1                  | 1450287_at   | 1452632_at            | 0.8274 |
| NPAS3   | TTF2                  | 1450287_at   | 1452818_at            | 0.8060 |
| NPAS3   | DHX38                 | 1450287_at   | 1453751_at            | 0.8015 |
| NPAS3   | BM114403              | 1450287_at   | 1455624_at            | 0.8201 |
| NPAS3   | TNC                   | 1450287_at   | 1456344_at            | 0.8192 |
| NPAS3   | BB053540              | 1450287_at   | 1456840_at            | 0.8232 |
| NPAS3   | BM235636              | 1450287_at   | 1456853_at            | 0.8399 |
| NPAS3   | AFFX-DapX-5_at        | 1450287_at   | AFFX-DapX-5_at        | 0.8335 |
| NPAS3   | AFFX-LysX-5_at        | 1450287_at   | AFFX-LysX-5_at        | 0.8122 |
| NPAS3   | AFFX-PheX-5_at        | 1450287_at   | AFFX-PheX-5_at        | 0.8347 |
| NPAS3   | AFFX-r2-Bs-lys-5_at   | 1450287_at   | AFFX-r2-Bs-lys-5_at   | 0.8236 |
| NPAS3   | AFFX-r2-Bs-thr-5_s_at | 1450287_at   | AFFX-r2-Bs-thr-5_s_at | 0.8189 |
| NPAS3   | AFFX-ThrX-5_at        | 1450287_at   | AFFX-ThrX-5_at        | 0.8165 |
| ZFP354C | SHC3                  | 1450321_at   | 1450326_at            | 0.8405 |
| ZFP354C | SOX3                  | 1450321_at   | 1450485_at            | 0.9236 |
| ZFP354C | NCOR2                 | 1450321_at   | 1451841_a_at          | 0.9526 |
| ZFP354C | ZFP2                  | 1450321_at   | 1452025_a_at          | 0.9055 |
| ZFP354C | 6720460F02RIK         | 1450321_at   | 1452073_at            | 0.8903 |
| ZFP354C | RRP1B                 | 1450321_at   | 1452119_at            | 0.8210 |
| ZFP354C | NOVA1                 | 1450321_at   | 1452245_at            | 0.8147 |
| ZFP354C | CENPF                 | 1450321_at   | 1452334_at            | 0.9130 |
| ZFP354C | ADAMTS7               | 1450321_at   | 1452339_at            | 0.8744 |
| ZFP354C | ASPM                  | 1450321_at   | 1452459_at            | 0.9016 |
| ZFP354C | TTF2                  | 1450321_at   | 1452818_at            | 0.8503 |
| ZFP354C | TMEM138               | 1450321_at   | 1452978_at            | 0.8038 |
| ZFP354C | RHOBTB3               | 1450321_at   | 1453227_at            | 0.9439 |
| ZFP354C | CALR3                 | 1450321_at   | 1453232_at            | 0.8064 |
| ZFP354C | TROAP                 | 1450321_at   | 1453370_at            | 0.8909 |
| ZFP354C | CEP55                 | 1450321_at   | 1453683_a_at          | 0.8597 |
| ZFP354C | DHX38                 | 1450321_at   | 1453751_at            | 0.9571 |
| ZFP354C | PHF6                  | 1450321_at   | 1453761_at            | 0.8688 |
| ZFP354C | FAM110A               | 1450321_at   | 1453768_a_at          | 0.8569 |
| ZFP354C | NETO2                 | 1450321_at   | 1454032_at            | 0.8322 |
| ZFP354C | EXOD1                 | 1450321_at   | 1454229_a_at          | 0.9165 |
| ZFP354C | XKR5                  | 1450321_at   | 1455127_at            | 0.8838 |
| ZFP354C | UTP23                 | 1450321_at   | 1455259_a_at          | 0.8358 |
| ZFP354C | ATP5G2                | 1450321_at   | 1456128_at            | 0.8516 |
| ZFP354C | 2700049P18RIK         | 1450321_at   | 1456163_at            | 0.8398 |
| ZFP354C | BB053540              | 1450321_at   | 1456840_at            | 0.8195 |
| ZFP354C | TAF2                  | 1450321_at   | 1457351_at            | 0.9038 |
| ZFP354C | ZNF69                 | 1450321_at   | 1458274_at            | 0.8410 |
| ZFP354C | BM224051              | 1450321_at   | 1458630_at            | 0.8879 |
| ZFP354C | RNF219                | 1450321_at   | 1458636_at            | 0.8880 |

|         |                       |              |                       |        |
|---------|-----------------------|--------------|-----------------------|--------|
| ZFP354C | 6530418L21RIK         | 1450321_at   | 1459051_at            | 0.9259 |
| ZFP354C | AFFX-DapX-5_at        | 1450321_at   | AFFX-DapX-5_at        | 0.8915 |
| ZFP354C | AFFX-LysX-5_at        | 1450321_at   | AFFX-LysX-5_at        | 0.8378 |
| ZFP354C | AFFX-r2-Bs-dap-5_at   | 1450321_at   | AFFX-r2-Bs-dap-5_at   | 0.8818 |
| ZFP354C | AFFX-r2-Bs-lys-5_at   | 1450321_at   | AFFX-r2-Bs-lys-5_at   | 0.8586 |
| ZFP354C | AFFX-r2-Bs-thr-5_s_at | 1450321_at   | AFFX-r2-Bs-thr-5_s_at | 0.8911 |
| ZFP354C | AFFX-ThrX-5_at        | 1450321_at   | AFFX-ThrX-5_at        | 0.8972 |
| SOX3    | SHC3                  | 1450485_at   | 1450326_at            | 0.8573 |
| NCOR2   | SHC3                  | 1451841_a_at | 1450326_at            | 0.8759 |
| TTF2    | SHC3                  | 1452818_at   | 1450326_at            | 0.8789 |
| PHF6    | SHC3                  | 1453761_at   | 1450326_at            | 0.8399 |
| TAF2    | SHC3                  | 1457351_at   | 1450326_at            | 0.8411 |
| MED1    | MYBL1                 | 1450402_at   | 1450481_at            | 0.9255 |
| MED1    | SOX3                  | 1450402_at   | 1450485_at            | 0.8081 |
| MED1    | HMGA2                 | 1450402_at   | 1450780_s_at          | 0.9178 |
| MED1    | HMGA2                 | 1450402_at   | 1450781_at            | 0.9244 |
| MED1    | ZNF451                | 1450402_at   | 1451816_at            | 0.9365 |
| MED1    | LMNB2                 | 1450402_at   | 1451849_a_at          | 0.8287 |
| MED1    | ZBED3                 | 1450402_at   | 1452088_at            | 0.9462 |
| MED1    | RRP1B                 | 1450402_at   | 1452119_at            | 0.8037 |
| MED1    | MLF1IP                | 1450402_at   | 1452816_at            | 0.9025 |
| MED1    | TTF2                  | 1450402_at   | 1452818_at            | 0.8850 |
| MED1    | TMEM138               | 1450402_at   | 1452978_at            | 0.8873 |
| MED1    | HELLS                 | 1450402_at   | 1453361_at            | 0.9083 |
| MED1    | TROAP                 | 1450402_at   | 1453370_at            | 0.8705 |
| MED1    | CEP55                 | 1450402_at   | 1453683_a_at          | 0.8619 |
| MED1    | PHF6                  | 1450402_at   | 1453761_at            | 0.8350 |
| MED1    | CCDC77                | 1450402_at   | 1454228_a_at          | 0.8642 |
| MED1    | UTP23                 | 1450402_at   | 1455259_a_at          | 0.8786 |
| MED1    | 2700049P18RIK         | 1450402_at   | 1456163_at            | 0.8542 |
| MED1    | DTL                   | 1450402_at   | 1456652_at            | 0.8111 |
| MED1    | RTEL1                 | 1450402_at   | 1456729_x_at          | 0.8571 |
| MED1    | AV254764              | 1450402_at   | 1456951_at            | 0.8482 |
| MED1    | TAF2                  | 1450402_at   | 1457351_at            | 0.8467 |
| MED1    | ETAA1                 | 1450402_at   | 1457882_at            | 0.9277 |
| MED1    | ZNF69                 | 1450402_at   | 1458274_at            | 0.8089 |
| MED1    | MTR                   | 1450402_at   | 1458532_at            | 0.8896 |
| MED1    | RNF219                | 1450402_at   | 1458636_at            | 0.8341 |
| MED1    | BB463474              | 1450402_at   | 1458902_at            | 0.9062 |
| MED1    | AA763515              | 1450402_at   | 1460065_at            | 0.9401 |
| MYBL1   | SOX3                  | 1450481_at   | 1450485_at            | 0.9120 |
| MYBL1   | SALL1                 | 1450481_at   | 1450489_at            | 0.8577 |
| MYBL1   | HMGA2                 | 1450481_at   | 1450780_s_at          | 0.9659 |
| MYBL1   | HMGA2                 | 1450481_at   | 1450781_at            | 0.9306 |
| MYBL1   | ZNF451                | 1450481_at   | 1451816_at            | 0.9755 |
| MYBL1   | NCOR2                 | 1450481_at   | 1451841_a_at          | 0.8306 |
| MYBL1   | LMNB2                 | 1450481_at   | 1451849_a_at          | 0.9020 |
| MYBL1   | ZFP2                  | 1450481_at   | 1452025_a_at          | 0.8572 |
| MYBL1   | 6720460F02RIK         | 1450481_at   | 1452073_at            | 0.8741 |
| MYBL1   | ZBED3                 | 1450481_at   | 1452088_at            | 0.9589 |
| MYBL1   | RRP1B                 | 1450481_at   | 1452119_at            | 0.9000 |

|       |                     |            |                     |        |
|-------|---------------------|------------|---------------------|--------|
| MYBL1 | CENPF               | 1450481_at | 1452334_at          | 0.8181 |
| MYBL1 | ASPM                | 1450481_at | 1452459_at          | 0.9044 |
| MYBL1 | AAK1                | 1450481_at | 1452632_at          | 0.8272 |
| MYBL1 | MLF1IP              | 1450481_at | 1452816_at          | 0.9575 |
| MYBL1 | TTF2                | 1450481_at | 1452818_at          | 0.9519 |
| MYBL1 | TMEM138             | 1450481_at | 1452978_at          | 0.9227 |
| MYBL1 | RHOBTB3             | 1450481_at | 1453227_at          | 0.9044 |
| MYBL1 | HELLS               | 1450481_at | 1453361_at          | 0.9086 |
| MYBL1 | TROAP               | 1450481_at | 1453370_at          | 0.9634 |
| MYBL1 | CEP55               | 1450481_at | 1453683_a_at        | 0.9747 |
| MYBL1 | DHX38               | 1450481_at | 1453751_at          | 0.8921 |
| MYBL1 | PHF6                | 1450481_at | 1453761_at          | 0.9664 |
| MYBL1 | NETO2               | 1450481_at | 1454032_at          | 0.8361 |
| MYBL1 | CCDC77              | 1450481_at | 1454228_a_at        | 0.9672 |
| MYBL1 | EXOD1               | 1450481_at | 1454229_a_at        | 0.9414 |
| MYBL1 | UTP23               | 1450481_at | 1455259_a_at        | 0.9713 |
| MYBL1 | 2700049P18RIK       | 1450481_at | 1456163_at          | 0.9429 |
| MYBL1 | RTEL1               | 1450481_at | 1456729_x_at        | 0.9183 |
| MYBL1 | AV254764            | 1450481_at | 1456951_at          | 0.9219 |
| MYBL1 | TAF2                | 1450481_at | 1457351_at          | 0.9618 |
| MYBL1 | ETAA1               | 1450481_at | 1457882_at          | 0.8634 |
| MYBL1 | ZNF69               | 1450481_at | 1458274_at          | 0.9005 |
| MYBL1 | MTR                 | 1450481_at | 1458532_at          | 0.9321 |
| MYBL1 | RNF219              | 1450481_at | 1458636_at          | 0.9480 |
| MYBL1 | BB463474            | 1450481_at | 1458902_at          | 0.9394 |
| MYBL1 | AA763515            | 1450481_at | 1460065_at          | 0.9208 |
| MYBL1 | AFFX-DapX-5_at      | 1450481_at | AFFX-DapX-5_at      | 0.8079 |
| MYBL1 | AFFX-r2-Bs-dap-5_at | 1450481_at | AFFX-r2-Bs-dap-5_at | 0.8008 |
| MYBL1 | AFFX-r2-Bs-lys-5_at | 1450481_at | AFFX-r2-Bs-lys-5_at | 0.8053 |
| SOX3  | SALL1               | 1450485_at | 1450489_at          | 0.8354 |
| SOX3  | HMGA2               | 1450485_at | 1450780_s_at        | 0.9087 |
| SOX3  | HMGA2               | 1450485_at | 1450781_at          | 0.8460 |
| SOX3  | ZNF451              | 1450485_at | 1451816_at          | 0.9134 |
| SOX3  | NCOR2               | 1450485_at | 1451841_a_at        | 0.9496 |
| SOX3  | LMNB2               | 1450485_at | 1451849_a_at        | 0.9203 |
| SOX3  | ZFP2                | 1450485_at | 1452025_a_at        | 0.9168 |
| SOX3  | 6720460F02RIK       | 1450485_at | 1452073_at          | 0.9145 |
| SOX3  | ZBED3               | 1450485_at | 1452088_at          | 0.8999 |
| SOX3  | RRP1B               | 1450485_at | 1452119_at          | 0.8888 |
| SOX3  | NOVA1               | 1450485_at | 1452245_at          | 0.8425 |
| SOX3  | CENPF               | 1450485_at | 1452334_at          | 0.8701 |
| SOX3  | ADAMTS7             | 1450485_at | 1452339_at          | 0.8217 |
| SOX3  | ASPM                | 1450485_at | 1452459_at          | 0.9201 |
| SOX3  | MLF1IP              | 1450485_at | 1452816_at          | 0.8732 |
| SOX3  | TTF2                | 1450485_at | 1452818_at          | 0.9459 |
| SOX3  | TMEM138             | 1450485_at | 1452978_at          | 0.9048 |
| SOX3  | RHOBTB3             | 1450485_at | 1453227_at          | 0.9579 |
| SOX3  | HELLS               | 1450485_at | 1453361_at          | 0.8571 |
| SOX3  | TROAP               | 1450485_at | 1453370_at          | 0.9691 |
| SOX3  | CEP55               | 1450485_at | 1453683_a_at        | 0.9561 |
| SOX3  | DHX38               | 1450485_at | 1453751_at          | 0.9406 |

|       |                       |              |                       |        |
|-------|-----------------------|--------------|-----------------------|--------|
| SOX3  | PHF6                  | 1450485_at   | 1453761_at            | 0.9552 |
| SOX3  | FAM110A               | 1450485_at   | 1453768_a_at          | 0.8859 |
| SOX3  | NETO2                 | 1450485_at   | 1454032_at            | 0.8716 |
| SOX3  | CCDC77                | 1450485_at   | 1454228_a_at          | 0.9000 |
| SOX3  | EXOD1                 | 1450485_at   | 1454229_a_at          | 0.9585 |
| SOX3  | XKR5                  | 1450485_at   | 1455127_at            | 0.8159 |
| SOX3  | UTP23                 | 1450485_at   | 1455259_a_at          | 0.9214 |
| SOX3  | IER5L                 | 1450485_at   | 1455881_at            | 0.8104 |
| SOX3  | 2700049P18RIK         | 1450485_at   | 1456163_at            | 0.9267 |
| SOX3  | BB053540              | 1450485_at   | 1456840_at            | 0.8323 |
| SOX3  | AV254764              | 1450485_at   | 1456951_at            | 0.8678 |
| SOX3  | TAF2                  | 1450485_at   | 1457351_at            | 0.9631 |
| SOX3  | ZNF69                 | 1450485_at   | 1458274_at            | 0.8517 |
| SOX3  | MTR                   | 1450485_at   | 1458532_at            | 0.8631 |
| SOX3  | RNF219                | 1450485_at   | 1458636_at            | 0.9651 |
| SOX3  | BB463474              | 1450485_at   | 1458902_at            | 0.8148 |
| SOX3  | 6530418L21RIK         | 1450485_at   | 1459051_at            | 0.8376 |
| SOX3  | AFFX-DapX-5_at        | 1450485_at   | AFFX-DapX-5_at        | 0.8692 |
| SOX3  | AFFX-LysX-5_at        | 1450485_at   | AFFX-LysX-5_at        | 0.8031 |
| SOX3  | AFFX-r2-Bs-dap-5_at   | 1450485_at   | AFFX-r2-Bs-dap-5_at   | 0.8620 |
| SOX3  | AFFX-r2-Bs-lys-5_at   | 1450485_at   | AFFX-r2-Bs-lys-5_at   | 0.8386 |
| SOX3  | AFFX-r2-Bs-thr-5_s_at | 1450485_at   | AFFX-r2-Bs-thr-5_s_at | 0.8386 |
| SOX3  | AFFX-ThrX-5_at        | 1450485_at   | AFFX-ThrX-5_at        | 0.8344 |
| SALL1 | HMGA2                 | 1450489_at   | 1450780_s_at          | 0.8406 |
| SALL1 | HMGA2                 | 1450489_at   | 1450781_at            | 0.8266 |
| SALL1 | ZNF451                | 1450489_at   | 1451816_at            | 0.8635 |
| SALL1 | LMNB2                 | 1450489_at   | 1451849_a_at          | 0.8457 |
| SALL1 | ZFP2                  | 1450489_at   | 1452025_a_at          | 0.8488 |
| SALL1 | ZBED3                 | 1450489_at   | 1452088_at            | 0.8531 |
| SALL1 | RRP1B                 | 1450489_at   | 1452119_at            | 0.8018 |
| SALL1 | MLF1IP                | 1450489_at   | 1452816_at            | 0.8233 |
| SALL1 | TTF2                  | 1450489_at   | 1452818_at            | 0.8536 |
| SALL1 | TMEM138               | 1450489_at   | 1452978_at            | 0.8075 |
| SALL1 | RHOBTB3               | 1450489_at   | 1453227_at            | 0.8253 |
| SALL1 | HELLS                 | 1450489_at   | 1453361_at            | 0.8081 |
| SALL1 | TROAP                 | 1450489_at   | 1453370_at            | 0.8587 |
| SALL1 | CEP55                 | 1450489_at   | 1453683_a_at          | 0.8615 |
| SALL1 | PHF6                  | 1450489_at   | 1453761_at            | 0.8569 |
| SALL1 | CCDC77                | 1450489_at   | 1454228_a_at          | 0.8562 |
| SALL1 | EXOD1                 | 1450489_at   | 1454229_a_at          | 0.8380 |
| SALL1 | UTP23                 | 1450489_at   | 1455259_a_at          | 0.8387 |
| SALL1 | 2700049P18RIK         | 1450489_at   | 1456163_at            | 0.8259 |
| SALL1 | TAF2                  | 1450489_at   | 1457351_at            | 0.8484 |
| SALL1 | RNF219                | 1450489_at   | 1458636_at            | 0.8521 |
| SALL1 | BB463474              | 1450489_at   | 1458902_at            | 0.8075 |
| HMGA2 | ZNF451                | 1450780_s_at | 1451816_at            | 0.9685 |
| HMGA2 | NCOR2                 | 1450780_s_at | 1451841_a_at          | 0.8159 |
| HMGA2 | LMNB2                 | 1450780_s_at | 1451849_a_at          | 0.9059 |
| HMGA2 | ZFP2                  | 1450780_s_at | 1452025_a_at          | 0.8502 |
| HMGA2 | 6720460F02RIK         | 1450780_s_at | 1452073_at            | 0.8971 |
| HMGA2 | ZBED3                 | 1450780_s_at | 1452088_at            | 0.9579 |

|       |               |              |              |        |
|-------|---------------|--------------|--------------|--------|
| HMGA2 | RRP1B         | 1450780_s_at | 1452119_at   | 0.8928 |
| HMGA2 | NOVA1         | 1450780_s_at | 1452245_at   | 0.8362 |
| HMGA2 | ASPM          | 1450780_s_at | 1452459_at   | 0.9022 |
| HMGA2 | AAK1          | 1450780_s_at | 1452632_at   | 0.8229 |
| HMGA2 | MLF1IP        | 1450780_s_at | 1452816_at   | 0.9440 |
| HMGA2 | TTF2          | 1450780_s_at | 1452818_at   | 0.9475 |
| HMGA2 | TMEM138       | 1450780_s_at | 1452978_at   | 0.9052 |
| HMGA2 | RHOBTB3       | 1450780_s_at | 1453227_at   | 0.8796 |
| HMGA2 | HELLS         | 1450780_s_at | 1453361_at   | 0.9085 |
| HMGA2 | TROAP         | 1450780_s_at | 1453370_at   | 0.9464 |
| HMGA2 | CEP55         | 1450780_s_at | 1453683_a_at | 0.9558 |
| HMGA2 | DHX38         | 1450780_s_at | 1453751_at   | 0.8576 |
| HMGA2 | PHF6          | 1450780_s_at | 1453761_at   | 0.9449 |
| HMGA2 | FAM110A       | 1450780_s_at | 1453768_a_at | 0.8175 |
| HMGA2 | NETO2         | 1450780_s_at | 1454032_at   | 0.8496 |
| HMGA2 | CCDC77        | 1450780_s_at | 1454228_a_at | 0.9476 |
| HMGA2 | EXOD1         | 1450780_s_at | 1454229_a_at | 0.9226 |
| HMGA2 | UTP23         | 1450780_s_at | 1455259_a_at | 0.9407 |
| HMGA2 | IER5L         | 1450780_s_at | 1455881_at   | 0.8307 |
| HMGA2 | 2700049P18RIK | 1450780_s_at | 1456163_at   | 0.9218 |
| HMGA2 | DTL           | 1450780_s_at | 1456652_at   | 0.8195 |
| HMGA2 | RTEL1         | 1450780_s_at | 1456729_x_at | 0.8839 |
| HMGA2 | AV254764      | 1450780_s_at | 1456951_at   | 0.9692 |
| HMGA2 | NETO2         | 1450780_s_at | 1457344_at   | 0.8194 |
| HMGA2 | TAF2          | 1450780_s_at | 1457351_at   | 0.9310 |
| HMGA2 | ETAA1         | 1450780_s_at | 1457882_at   | 0.8715 |
| HMGA2 | ZNF69         | 1450780_s_at | 1458274_at   | 0.8576 |
| HMGA2 | MTR           | 1450780_s_at | 1458532_at   | 0.8963 |
| HMGA2 | RNF219        | 1450780_s_at | 1458636_at   | 0.9336 |
| HMGA2 | BB463474      | 1450780_s_at | 1458902_at   | 0.9640 |
| HMGA2 | AA763515      | 1450780_s_at | 1460065_at   | 0.9290 |
| HMGA2 | ZNF451        | 1450781_at   | 1451816_at   | 0.9569 |
| HMGA2 | LMNB2         | 1450781_at   | 1451849_a_at | 0.8942 |
| HMGA2 | ZBED3         | 1450781_at   | 1452088_at   | 0.9767 |
| HMGA2 | RRP1B         | 1450781_at   | 1452119_at   | 0.8260 |
| HMGA2 | MLF1IP        | 1450781_at   | 1452816_at   | 0.8807 |
| HMGA2 | TTF2          | 1450781_at   | 1452818_at   | 0.8926 |
| HMGA2 | TMEM138       | 1450781_at   | 1452978_at   | 0.8572 |
| HMGA2 | HELLS         | 1450781_at   | 1453361_at   | 0.9175 |
| HMGA2 | TROAP         | 1450781_at   | 1453370_at   | 0.8724 |
| HMGA2 | CEP55         | 1450781_at   | 1453683_a_at | 0.8905 |
| HMGA2 | PHF6          | 1450781_at   | 1453761_at   | 0.8732 |
| HMGA2 | CCDC77        | 1450781_at   | 1454228_a_at | 0.9075 |
| HMGA2 | EXOD1         | 1450781_at   | 1454229_a_at | 0.8177 |
| HMGA2 | UTP23         | 1450781_at   | 1455259_a_at | 0.8531 |
| HMGA2 | IER5L         | 1450781_at   | 1455881_at   | 0.8664 |
| HMGA2 | 2700049P18RIK | 1450781_at   | 1456163_at   | 0.8652 |
| HMGA2 | DTL           | 1450781_at   | 1456652_at   | 0.8236 |
| HMGA2 | RTEL1         | 1450781_at   | 1456729_x_at | 0.8092 |
| HMGA2 | AV254764      | 1450781_at   | 1456951_at   | 0.8748 |
| HMGA2 | TAF2          | 1450781_at   | 1457351_at   | 0.8433 |

|        |               |              |              |        |
|--------|---------------|--------------|--------------|--------|
| HMGA2  | ETAA1         | 1450781_at   | 1457882_at   | 0.9306 |
| HMGA2  | MTR           | 1450781_at   | 1458532_at   | 0.8479 |
| HMGA2  | RNF219        | 1450781_at   | 1458636_at   | 0.8553 |
| HMGA2  | BB463474      | 1450781_at   | 1458902_at   | 0.9187 |
| HMGA2  | AA763515      | 1450781_at   | 1460065_at   | 0.9864 |
| PA2G4  | PVT1          | 1450854_at   | 1452324_at   | 0.8531 |
| PA2G4  | NETO2         | 1450854_at   | 1454032_at   | 0.8620 |
| ZNF451 | NCOR2         | 1451816_at   | 1451841_a_at | 0.8041 |
| ZNF451 | LMNB2         | 1451816_at   | 1451849_a_at | 0.9257 |
| ZNF451 | ZFP2          | 1451816_at   | 1452025_a_at | 0.8332 |
| ZNF451 | 6720460F02RIK | 1451816_at   | 1452073_at   | 0.8454 |
| ZNF451 | ZBED3         | 1451816_at   | 1452088_at   | 0.9838 |
| ZNF451 | RRP1B         | 1451816_at   | 1452119_at   | 0.8810 |
| ZNF451 | ASPM          | 1451816_at   | 1452459_at   | 0.8677 |
| ZNF451 | AAK1          | 1451816_at   | 1452632_at   | 0.8172 |
| ZNF451 | MLF1IP        | 1451816_at   | 1452816_at   | 0.9601 |
| ZNF451 | TTF2          | 1451816_at   | 1452818_at   | 0.9411 |
| ZNF451 | TMEM138       | 1451816_at   | 1452978_at   | 0.9218 |
| ZNF451 | RHOBTB3       | 1451816_at   | 1453227_at   | 0.8760 |
| ZNF451 | HELLS         | 1451816_at   | 1453361_at   | 0.9503 |
| ZNF451 | TROAP         | 1451816_at   | 1453370_at   | 0.9639 |
| ZNF451 | CEP55         | 1451816_at   | 1453683_a_at | 0.9613 |
| ZNF451 | DHX38         | 1451816_at   | 1453751_at   | 0.8546 |
| ZNF451 | PHF6          | 1451816_at   | 1453761_at   | 0.9482 |
| ZNF451 | NETO2         | 1451816_at   | 1454032_at   | 0.8197 |
| ZNF451 | CCDC77        | 1451816_at   | 1454228_a_at | 0.9732 |
| ZNF451 | EXOD1         | 1451816_at   | 1454229_a_at | 0.9137 |
| ZNF451 | UTP23         | 1451816_at   | 1455259_a_at | 0.9386 |
| ZNF451 | IER5L         | 1451816_at   | 1455881_at   | 0.8441 |
| ZNF451 | 2700049P18RIK | 1451816_at   | 1456163_at   | 0.9365 |
| ZNF451 | DTL           | 1451816_at   | 1456652_at   | 0.8104 |
| ZNF451 | RTEL1         | 1451816_at   | 1456729_x_at | 0.8793 |
| ZNF451 | AV254764      | 1451816_at   | 1456951_at   | 0.9280 |
| ZNF451 | TAF2          | 1451816_at   | 1457351_at   | 0.9361 |
| ZNF451 | ETAA1         | 1451816_at   | 1457882_at   | 0.9106 |
| ZNF451 | ZNF69         | 1451816_at   | 1458274_at   | 0.8359 |
| ZNF451 | MTR           | 1451816_at   | 1458532_at   | 0.9160 |
| ZNF451 | RNF219        | 1451816_at   | 1458636_at   | 0.9415 |
| ZNF451 | BB463474      | 1451816_at   | 1458902_at   | 0.9532 |
| ZNF451 | AA763515      | 1451816_at   | 1460065_at   | 0.9383 |
| NCOR2  | LMNB2         | 1451841_a_at | 1451849_a_at | 0.8727 |
| NCOR2  | ZFP2          | 1451841_a_at | 1452025_a_at | 0.9374 |
| NCOR2  | 6720460F02RIK | 1451841_a_at | 1452073_at   | 0.9204 |
| NCOR2  | RRP1B         | 1451841_a_at | 1452119_at   | 0.8762 |
| NCOR2  | NOVA1         | 1451841_a_at | 1452245_at   | 0.8699 |
| NCOR2  | CENPF         | 1451841_a_at | 1452334_at   | 0.9225 |
| NCOR2  | ADAMTS7       | 1451841_a_at | 1452339_at   | 0.8707 |
| NCOR2  | ASPM          | 1451841_a_at | 1452459_at   | 0.9213 |
| NCOR2  | TTF2          | 1451841_a_at | 1452818_at   | 0.8882 |
| NCOR2  | TMEM138       | 1451841_a_at | 1452978_at   | 0.8154 |
| NCOR2  | RHOBTB3       | 1451841_a_at | 1453227_at   | 0.9729 |

|        |                       |              |                       |        |
|--------|-----------------------|--------------|-----------------------|--------|
| NCOR2  | CALR3                 | 1451841_a_at | 1453232_at            | 0.8921 |
| NCOR2  | TROAP                 | 1451841_a_at | 1453370_at            | 0.9115 |
| NCOR2  | CEP55                 | 1451841_a_at | 1453683_a_at          | 0.9155 |
| NCOR2  | DHX38                 | 1451841_a_at | 1453751_at            | 0.9269 |
| NCOR2  | PHF6                  | 1451841_a_at | 1453761_at            | 0.9260 |
| NCOR2  | FAM110A               | 1451841_a_at | 1453768_a_at          | 0.8755 |
| NCOR2  | NETO2                 | 1451841_a_at | 1454032_at            | 0.8655 |
| NCOR2  | CCDC77                | 1451841_a_at | 1454228_a_at          | 0.8516 |
| NCOR2  | EXOD1                 | 1451841_a_at | 1454229_a_at          | 0.9486 |
| NCOR2  | XKR5                  | 1451841_a_at | 1455127_at            | 0.8062 |
| NCOR2  | UTP23                 | 1451841_a_at | 1455259_a_at          | 0.8746 |
| NCOR2  | BM114403              | 1451841_a_at | 1455624_at            | 0.8048 |
| NCOR2  | ATP5G2                | 1451841_a_at | 1456128_at            | 0.8759 |
| NCOR2  | 2700049P18RIK         | 1451841_a_at | 1456163_at            | 0.8778 |
| NCOR2  | BB053540              | 1451841_a_at | 1456840_at            | 0.8406 |
| NCOR2  | TAF2                  | 1451841_a_at | 1457351_at            | 0.9180 |
| NCOR2  | ZNF69                 | 1451841_a_at | 1458274_at            | 0.8381 |
| NCOR2  | BM224051              | 1451841_a_at | 1458630_at            | 0.8531 |
| NCOR2  | RNF219                | 1451841_a_at | 1458636_at            | 0.9369 |
| NCOR2  | 6530418L21RIK         | 1451841_a_at | 1459051_at            | 0.9297 |
| NCOR2  | AFFX-DapX-5_at        | 1451841_a_at | AFFX-DapX-5_at        | 0.9108 |
| NCOR2  | AFFX-LysX-5_at        | 1451841_a_at | AFFX-LysX-5_at        | 0.8362 |
| NCOR2  | AFFX-r2-Bs-dap-5_at   | 1451841_a_at | AFFX-r2-Bs-dap-5_at   | 0.9051 |
| NCOR2  | AFFX-r2-Bs-lys-5_at   | 1451841_a_at | AFFX-r2-Bs-lys-5_at   | 0.8743 |
| NCOR2  | AFFX-r2-Bs-thr-5_s_at | 1451841_a_at | AFFX-r2-Bs-thr-5_s_at | 0.8936 |
| NCOR2  | AFFX-ThrX-5_at        | 1451841_a_at | AFFX-ThrX-5_at        | 0.8960 |
| ZFP2   | LMNB2                 | 1452025_a_at | 1451849_a_at          | 0.8641 |
| ZBED3  | LMNB2                 | 1452088_at   | 1451849_a_at          | 0.8961 |
| MLF1IP | LMNB2                 | 1452816_at   | 1451849_a_at          | 0.8640 |
| TTF2   | LMNB2                 | 1452818_at   | 1451849_a_at          | 0.9147 |
| HELLS  | LMNB2                 | 1453361_at   | 1451849_a_at          | 0.8884 |
| PHF6   | LMNB2                 | 1453761_at   | 1451849_a_at          | 0.9057 |
| TAF2   | LMNB2                 | 1457351_at   | 1451849_a_at          | 0.8855 |
| ZNF69  | LMNB2                 | 1458274_at   | 1451849_a_at          | 0.8082 |
| ZFP2   | 6720460F02RIK         | 1452025_a_at | 1452073_at            | 0.9005 |
| ZFP2   | RRP1B                 | 1452025_a_at | 1452119_at            | 0.8492 |
| ZFP2   | NOVA1                 | 1452025_a_at | 1452245_at            | 0.8890 |
| ZFP2   | CENPF                 | 1452025_a_at | 1452334_at            | 0.8981 |
| ZFP2   | ADAMTS7               | 1452025_a_at | 1452339_at            | 0.8218 |
| ZFP2   | ASPM                  | 1452025_a_at | 1452459_at            | 0.9234 |
| ZFP2   | TTF2                  | 1452025_a_at | 1452818_at            | 0.8703 |
| ZFP2   | TMEM138               | 1452025_a_at | 1452978_at            | 0.8207 |
| ZFP2   | RHOBTB3               | 1452025_a_at | 1453227_at            | 0.9587 |
| ZFP2   | CALR3                 | 1452025_a_at | 1453232_at            | 0.8301 |
| ZFP2   | TROAP                 | 1452025_a_at | 1453370_at            | 0.9126 |
| ZFP2   | CEP55                 | 1452025_a_at | 1453683_a_at          | 0.9191 |
| ZFP2   | DHX38                 | 1452025_a_at | 1453751_at            | 0.9061 |
| ZFP2   | PHF6                  | 1452025_a_at | 1453761_at            | 0.9271 |
| ZFP2   | FAM110A               | 1452025_a_at | 1453768_a_at          | 0.8312 |
| ZFP2   | NETO2                 | 1452025_a_at | 1454032_at            | 0.8462 |
| ZFP2   | CCDC77                | 1452025_a_at | 1454228_a_at          | 0.8774 |

|        |                       |              |                       |        |
|--------|-----------------------|--------------|-----------------------|--------|
| ZFP2   | EXOD1                 | 1452025_a_at | 1454229_a_at          | 0.9443 |
| ZFP2   | XKR5                  | 1452025_a_at | 1455127_at            | 0.8295 |
| ZFP2   | UTP23                 | 1452025_a_at | 1455259_a_at          | 0.8917 |
| ZFP2   | ATP5G2                | 1452025_a_at | 1456128_at            | 0.9020 |
| ZFP2   | 2700049P18RIK         | 1452025_a_at | 1456163_at            | 0.8669 |
| ZFP2   | BB053540              | 1452025_a_at | 1456840_at            | 0.8871 |
| ZFP2   | AV254764              | 1452025_a_at | 1456951_at            | 0.8573 |
| ZFP2   | TAF2                  | 1452025_a_at | 1457351_at            | 0.9183 |
| ZFP2   | ZNF69                 | 1452025_a_at | 1458274_at            | 0.8286 |
| ZFP2   | RNF219                | 1452025_a_at | 1458636_at            | 0.9278 |
| ZFP2   | 6530418L21RIK         | 1452025_a_at | 1459051_at            | 0.8520 |
| ZFP2   | BB527979              | 1452025_a_at | 1459950_at            | 0.8085 |
| ZFP2   | AFFX-DapX-5_at        | 1452025_a_at | AFFX-DapX-5_at        | 0.8672 |
| ZFP2   | AFFX-LysX-5_at        | 1452025_a_at | AFFX-LysX-5_at        | 0.8256 |
| ZFP2   | AFFX-r2-Bs-dap-5_at   | 1452025_a_at | AFFX-r2-Bs-dap-5_at   | 0.8782 |
| ZFP2   | AFFX-r2-Bs-lys-5_at   | 1452025_a_at | AFFX-r2-Bs-lys-5_at   | 0.8605 |
| ZFP2   | AFFX-r2-Bs-thr-5_s_at | 1452025_a_at | AFFX-r2-Bs-thr-5_s_at | 0.8511 |
| ZFP2   | AFFX-ThrX-5_at        | 1452025_a_at | AFFX-ThrX-5_at        | 0.8596 |
| ZBED3  | 6720460F02RIK         | 1452088_at   | 1452073_at            | 0.8098 |
| CENPF  | 6720460F02RIK         | 1452334_at   | 1452073_at            | 0.8938 |
| MLF1IP | 6720460F02RIK         | 1452816_at   | 1452073_at            | 0.8477 |
| TTF2   | 6720460F02RIK         | 1452818_at   | 1452073_at            | 0.9238 |
| PHF6   | 6720460F02RIK         | 1453761_at   | 1452073_at            | 0.9279 |
| TAF2   | 6720460F02RIK         | 1457351_at   | 1452073_at            | 0.9278 |
| ZNF69  | 6720460F02RIK         | 1458274_at   | 1452073_at            | 0.8448 |
| ZBED3  | RRP1B                 | 1452088_at   | 1452119_at            | 0.8544 |
| ZBED3  | ASPM                  | 1452088_at   | 1452459_at            | 0.8211 |
| ZBED3  | MLF1IP                | 1452088_at   | 1452816_at            | 0.9284 |
| ZBED3  | TTF2                  | 1452088_at   | 1452818_at            | 0.9253 |
| ZBED3  | TMEM138               | 1452088_at   | 1452978_at            | 0.9035 |
| ZBED3  | RHOBTB3               | 1452088_at   | 1453227_at            | 0.8292 |
| ZBED3  | HELLS                 | 1452088_at   | 1453361_at            | 0.9369 |
| ZBED3  | TROAP                 | 1452088_at   | 1453370_at            | 0.9310 |
| ZBED3  | CEP55                 | 1452088_at   | 1453683_a_at          | 0.9286 |
| ZBED3  | DHX38                 | 1452088_at   | 1453751_at            | 0.8190 |
| ZBED3  | PHF6                  | 1452088_at   | 1453761_at            | 0.9142 |
| ZBED3  | CCDC77                | 1452088_at   | 1454228_a_at          | 0.9332 |
| ZBED3  | EXOD1                 | 1452088_at   | 1454229_a_at          | 0.8724 |
| ZBED3  | UTP23                 | 1452088_at   | 1455259_a_at          | 0.9032 |
| ZBED3  | IER5L                 | 1452088_at   | 1455881_at            | 0.8501 |
| ZBED3  | 2700049P18RIK         | 1452088_at   | 1456163_at            | 0.9082 |
| ZBED3  | DTL                   | 1452088_at   | 1456652_at            | 0.8218 |
| ZBED3  | RTEL1                 | 1452088_at   | 1456729_x_at          | 0.8519 |
| ZBED3  | AV254764              | 1452088_at   | 1456951_at            | 0.9033 |
| ZBED3  | TAF2                  | 1452088_at   | 1457351_at            | 0.9094 |
| ZBED3  | ETAA1                 | 1452088_at   | 1457882_at            | 0.9396 |
| ZBED3  | ZNF69                 | 1452088_at   | 1458274_at            | 0.8118 |
| ZBED3  | MTR                   | 1452088_at   | 1458532_at            | 0.8866 |
| ZBED3  | RNF219                | 1452088_at   | 1458636_at            | 0.8997 |
| ZBED3  | BB463474              | 1452088_at   | 1458902_at            | 0.9360 |
| ZBED3  | AA763515              | 1452088_at   | 1460065_at            | 0.9566 |



|        |                       |            |                       |        |
|--------|-----------------------|------------|-----------------------|--------|
| CENPF  | RRP1B                 | 1452334_at | 1452119_at            | 0.8422 |
| MLF1IP | RRP1B                 | 1452816_at | 1452119_at            | 0.8566 |
| TTF2   | RRP1B                 | 1452818_at | 1452119_at            | 0.9199 |
| HELLS  | RRP1B                 | 1453361_at | 1452119_at            | 0.8428 |
| PHF6   | RRP1B                 | 1453761_at | 1452119_at            | 0.9273 |
| TAF2   | RRP1B                 | 1457351_at | 1452119_at            | 0.9130 |
| ZNF69  | RRP1B                 | 1458274_at | 1452119_at            | 0.8686 |
| CENPF  | NOVA1                 | 1452334_at | 1452245_at            | 0.8342 |
| PHF6   | NOVA1                 | 1453761_at | 1452245_at            | 0.8647 |
| TAF2   | NOVA1                 | 1457351_at | 1452245_at            | 0.8356 |
| PHF6   | PVT1                  | 1453761_at | 1452324_at            | 0.8054 |
| CENPF  | ADAMTS7               | 1452334_at | 1452339_at            | 0.8339 |
| CENPF  | ASPM                  | 1452334_at | 1452459_at            | 0.9322 |
| CENPF  | TTF2                  | 1452334_at | 1452818_at            | 0.8554 |
| CENPF  | RHOBTB3               | 1452334_at | 1453227_at            | 0.9413 |
| CENPF  | CALR3                 | 1452334_at | 1453232_at            | 0.8801 |
| CENPF  | TROAP                 | 1452334_at | 1453370_at            | 0.8659 |
| CENPF  | CEP55                 | 1452334_at | 1453683_a_at          | 0.8870 |
| CENPF  | DHX38                 | 1452334_at | 1453751_at            | 0.9329 |
| CENPF  | PHF6                  | 1452334_at | 1453761_at            | 0.8949 |
| CENPF  | FAM110A               | 1452334_at | 1453768_a_at          | 0.8099 |
| CENPF  | NETO2                 | 1452334_at | 1454032_at            | 0.8457 |
| CENPF  | EXOD1                 | 1452334_at | 1454229_a_at          | 0.9307 |
| CENPF  | UTP23                 | 1452334_at | 1455259_a_at          | 0.9102 |
| CENPF  | ATP5G2                | 1452334_at | 1456128_at            | 0.8589 |
| CENPF  | 2700049P18RIK         | 1452334_at | 1456163_at            | 0.8546 |
| CENPF  | BB053540              | 1452334_at | 1456840_at            | 0.8140 |
| CENPF  | TAF2                  | 1452334_at | 1457351_at            | 0.9000 |
| CENPF  | ZNF69                 | 1452334_at | 1458274_at            | 0.8571 |
| CENPF  | BM224051              | 1452334_at | 1458630_at            | 0.8916 |
| CENPF  | RNF219                | 1452334_at | 1458636_at            | 0.9041 |
| CENPF  | 6530418L21RIK         | 1452334_at | 1459051_at            | 0.9082 |
| CENPF  | BB527979              | 1452334_at | 1459950_at            | 0.8210 |
| CENPF  | AFFX-DapX-5_at        | 1452334_at | AFFX-DapX-5_at        | 0.8969 |
| CENPF  | AFFX-LysX-5_at        | 1452334_at | AFFX-LysX-5_at        | 0.8820 |
| CENPF  | AFFX-PheX-5_at        | 1452334_at | AFFX-PheX-5_at        | 0.8135 |
| CENPF  | AFFX-r2-Bs-dap-5_at   | 1452334_at | AFFX-r2-Bs-dap-5_at   | 0.8858 |
| CENPF  | AFFX-r2-Bs-lys-5_at   | 1452334_at | AFFX-r2-Bs-lys-5_at   | 0.8874 |
| CENPF  | AFFX-r2-Bs-thr-5_s_at | 1452334_at | AFFX-r2-Bs-thr-5_s_at | 0.8979 |
| CENPF  | AFFX-ThrX-5_at        | 1452334_at | AFFX-ThrX-5_at        | 0.9153 |
| MLF1IP | ASPM                  | 1452816_at | 1452459_at            | 0.8808 |
| TTF2   | ASPM                  | 1452818_at | 1452459_at            | 0.9242 |
| PHF6   | ASPM                  | 1453761_at | 1452459_at            | 0.9539 |
| TAF2   | ASPM                  | 1457351_at | 1452459_at            | 0.9577 |
| ZNF69  | ASPM                  | 1458274_at | 1452459_at            | 0.8856 |
| MLF1IP | AAK1                  | 1452816_at | 1452632_at            | 0.8025 |
| TTF2   | AAK1                  | 1452818_at | 1452632_at            | 0.8189 |
| PHF6   | AAK1                  | 1453761_at | 1452632_at            | 0.8411 |
| TAF2   | AAK1                  | 1457351_at | 1452632_at            | 0.8049 |
| MLF1IP | TTF2                  | 1452816_at | 1452818_at            | 0.9174 |
| MLF1IP | TMEM138               | 1452816_at | 1452978_at            | 0.8920 |

|        |                       |            |                       |        |
|--------|-----------------------|------------|-----------------------|--------|
| MLF1IP | RHOBTB3               | 1452816_at | 1453227_at            | 0.8564 |
| MLF1IP | HELLS                 | 1452816_at | 1453361_at            | 0.8947 |
| MLF1IP | TROAP                 | 1452816_at | 1453370_at            | 0.9433 |
| MLF1IP | CEP55                 | 1452816_at | 1453683_a_at          | 0.9377 |
| MLF1IP | DHX38                 | 1452816_at | 1453751_at            | 0.8472 |
| MLF1IP | PHF6                  | 1452816_at | 1453761_at            | 0.9270 |
| MLF1IP | NETO2                 | 1452816_at | 1454032_at            | 0.8137 |
| MLF1IP | CCDC77                | 1452816_at | 1454228_a_at          | 0.9385 |
| MLF1IP | EXOD1                 | 1452816_at | 1454229_a_at          | 0.8987 |
| MLF1IP | UTP23                 | 1452816_at | 1455259_a_at          | 0.9399 |
| MLF1IP | IER5L                 | 1452816_at | 1455881_at            | 0.8016 |
| MLF1IP | 2700049P18RIK         | 1452816_at | 1456163_at            | 0.9104 |
| MLF1IP | DTL                   | 1452816_at | 1456652_at            | 0.8190 |
| MLF1IP | RTEL1                 | 1452816_at | 1456729_x_at          | 0.9121 |
| MLF1IP | AV254764              | 1452816_at | 1456951_at            | 0.9036 |
| MLF1IP | TAF2                  | 1452816_at | 1457351_at            | 0.9305 |
| MLF1IP | ETAA1                 | 1452816_at | 1457882_at            | 0.8535 |
| MLF1IP | ZNF69                 | 1452816_at | 1458274_at            | 0.8317 |
| MLF1IP | MTR                   | 1452816_at | 1458532_at            | 0.9237 |
| MLF1IP | RNF219                | 1452816_at | 1458636_at            | 0.9159 |
| MLF1IP | BB463474              | 1452816_at | 1458902_at            | 0.9647 |
| MLF1IP | AA763515              | 1452816_at | 1460065_at            | 0.8708 |
| TTF2   | TMEM138               | 1452818_at | 1452978_at            | 0.9202 |
| TTF2   | RHOBTB3               | 1452818_at | 1453227_at            | 0.9237 |
| TTF2   | HELLS                 | 1452818_at | 1453361_at            | 0.8866 |
| TTF2   | TROAP                 | 1452818_at | 1453370_at            | 0.9630 |
| TTF2   | CEP55                 | 1452818_at | 1453683_a_at          | 0.9627 |
| TTF2   | DHX38                 | 1452818_at | 1453751_at            | 0.9248 |
| TTF2   | PHF6                  | 1452818_at | 1453761_at            | 0.9556 |
| TTF2   | FAM110A               | 1452818_at | 1453768_a_at          | 0.8358 |
| TTF2   | NETO2                 | 1452818_at | 1454032_at            | 0.8533 |
| TTF2   | CCDC77                | 1452818_at | 1454228_a_at          | 0.9331 |
| TTF2   | EXOD1                 | 1452818_at | 1454229_a_at          | 0.9447 |
| TTF2   | UTP23                 | 1452818_at | 1455259_a_at          | 0.9507 |
| TTF2   | IER5L                 | 1452818_at | 1455881_at            | 0.8008 |
| TTF2   | 2700049P18RIK         | 1452818_at | 1456163_at            | 0.9536 |
| TTF2   | RTEL1                 | 1452818_at | 1456729_x_at          | 0.8610 |
| TTF2   | BB053540              | 1452818_at | 1456840_at            | 0.8209 |
| TTF2   | AV254764              | 1452818_at | 1456951_at            | 0.9006 |
| TTF2   | TAF2                  | 1452818_at | 1457351_at            | 0.9614 |
| TTF2   | ZNF69                 | 1452818_at | 1458274_at            | 0.9112 |
| TTF2   | MTR                   | 1452818_at | 1458532_at            | 0.9113 |
| TTF2   | RNF219                | 1452818_at | 1458636_at            | 0.9505 |
| TTF2   | BB463474              | 1452818_at | 1458902_at            | 0.8844 |
| TTF2   | AA763515              | 1452818_at | 1460065_at            | 0.8651 |
| TTF2   | AFFX-DapX-5_at        | 1452818_at | AFFX-DapX-5_at        | 0.8553 |
| TTF2   | AFFX-LysX-5_at        | 1452818_at | AFFX-LysX-5_at        | 0.8027 |
| TTF2   | AFFX-r2-Bs-dap-5_at   | 1452818_at | AFFX-r2-Bs-dap-5_at   | 0.8482 |
| TTF2   | AFFX-r2-Bs-lys-5_at   | 1452818_at | AFFX-r2-Bs-lys-5_at   | 0.8433 |
| TTF2   | AFFX-r2-Bs-thr-5_s_at | 1452818_at | AFFX-r2-Bs-thr-5_s_at | 0.8044 |
| HELLS  | TMEM138               | 1453361_at | 1452978_at            | 0.9403 |

|       |                     |            |                     |        |
|-------|---------------------|------------|---------------------|--------|
| PHF6  | TMEM138             | 1453761_at | 1452978_at          | 0.9053 |
| TAF2  | TMEM138             | 1457351_at | 1452978_at          | 0.9151 |
| ZNF69 | TMEM138             | 1458274_at | 1452978_at          | 0.8495 |
| PHF6  | RHOBTB3             | 1453761_at | 1453227_at          | 0.9766 |
| TAF2  | RHOBTB3             | 1457351_at | 1453227_at          | 0.9709 |
| ZNF69 | RHOBTB3             | 1458274_at | 1453227_at          | 0.8769 |
| PHF6  | CALR3               | 1453761_at | 1453232_at          | 0.8177 |
| HELLS | TROAP               | 1453361_at | 1453370_at          | 0.9095 |
| HELLS | CEP55               | 1453361_at | 1453683_a_at        | 0.8866 |
| HELLS | PHF6                | 1453361_at | 1453761_at          | 0.8679 |
| HELLS | CCDC77              | 1453361_at | 1454228_a_at        | 0.9186 |
| HELLS | EXOD1               | 1453361_at | 1454229_a_at        | 0.8380 |
| HELLS | UTP23               | 1453361_at | 1455259_a_at        | 0.8546 |
| HELLS | 2700049P18RIK       | 1453361_at | 1456163_at          | 0.8996 |
| HELLS | AV254764            | 1453361_at | 1456951_at          | 0.8583 |
| HELLS | TAF2                | 1453361_at | 1457351_at          | 0.8633 |
| HELLS | ETAA1               | 1453361_at | 1457882_at          | 0.8652 |
| HELLS | MTR                 | 1453361_at | 1458532_at          | 0.8823 |
| HELLS | RNF219              | 1453361_at | 1458636_at          | 0.8727 |
| HELLS | BB463474            | 1453361_at | 1458902_at          | 0.8789 |
| HELLS | AA763515            | 1453361_at | 1460065_at          | 0.8993 |
| PHF6  | TROAP               | 1453761_at | 1453370_at          | 0.9800 |
| TAF2  | TROAP               | 1457351_at | 1453370_at          | 0.9879 |
| ZNF69 | TROAP               | 1458274_at | 1453370_at          | 0.8887 |
| PHF6  | CEP55               | 1453761_at | 1453683_a_at        | 0.9984 |
| TAF2  | CEP55               | 1457351_at | 1453683_a_at        | 0.9826 |
| ZNF69 | CEP55               | 1458274_at | 1453683_a_at        | 0.8893 |
| PHF6  | DHX38               | 1453761_at | 1453751_at          | 0.9318 |
| TAF2  | DHX38               | 1457351_at | 1453751_at          | 0.9662 |
| ZNF69 | DHX38               | 1458274_at | 1453751_at          | 0.8965 |
| PHF6  | FAM110A             | 1453761_at | 1453768_a_at        | 0.8502 |
| PHF6  | NETO2               | 1453761_at | 1454032_at          | 0.8935 |
| PHF6  | CCDC77              | 1453761_at | 1454228_a_at        | 0.9683 |
| PHF6  | EXOD1               | 1453761_at | 1454229_a_at        | 0.9889 |
| PHF6  | UTP23               | 1453761_at | 1455259_a_at        | 0.9817 |
| PHF6  | IER5L               | 1453761_at | 1455881_at          | 0.8011 |
| PHF6  | 2700049P18RIK       | 1453761_at | 1456163_at          | 0.9641 |
| PHF6  | RTEL1               | 1453761_at | 1456729_x_at        | 0.8882 |
| PHF6  | BB053540            | 1453761_at | 1456840_at          | 0.8477 |
| PHF6  | AV254764            | 1453761_at | 1456951_at          | 0.9209 |
| PHF6  | NETO2               | 1453761_at | 1457344_at          | 0.8141 |
| PHF6  | TAF2                | 1453761_at | 1457351_at          | 0.9834 |
| PHF6  | ZNF69               | 1453761_at | 1458274_at          | 0.8860 |
| PHF6  | MTR                 | 1453761_at | 1458532_at          | 0.8824 |
| PHF6  | RNF219              | 1453761_at | 1458636_at          | 0.9886 |
| PHF6  | BB463474            | 1453761_at | 1458902_at          | 0.8971 |
| PHF6  | 6530418L21RIK       | 1453761_at | 1459051_at          | 0.8257 |
| PHF6  | AA763515            | 1453761_at | 1460065_at          | 0.8397 |
| PHF6  | AFFX-DapX-5_at      | 1453761_at | AFFX-DapX-5_at      | 0.8923 |
| PHF6  | AFFX-LysX-5_at      | 1453761_at | AFFX-LysX-5_at      | 0.8593 |
| PHF6  | AFFX-r2-Bs-dap-5_at | 1453761_at | AFFX-r2-Bs-dap-5_at | 0.8822 |

|         |                       |              |                       |         |
|---------|-----------------------|--------------|-----------------------|---------|
| PHF6    | AFFX-r2-Bs-lys-5_at   | 1453761_at   | AFFX-r2-Bs-lys-5_at   | 0.8853  |
| PHF6    | AFFX-r2-Bs-thr-5_s_at | 1453761_at   | AFFX-r2-Bs-thr-5_s_at | 0.8596  |
| PHF6    | AFFX-ThrX-5_at        | 1453761_at   | AFFX-ThrX-5_at        | 0.8621  |
| TAF2    | FAM110A               | 1457351_at   | 1453768_a_at          | 0.8548  |
| TAF2    | NETO2                 | 1457351_at   | 1454032_at            | 0.8834  |
| TAF2    | CCDC77                | 1457351_at   | 1454228_a_at          | 0.9473  |
| ZNF69   | CCDC77                | 1458274_at   | 1454228_a_at          | 0.8688  |
| TAF2    | EXOD1                 | 1457351_at   | 1454229_a_at          | 0.9831  |
| ZNF69   | EXOD1                 | 1458274_at   | 1454229_a_at          | 0.8942  |
| TAF2    | XKR5                  | 1457351_at   | 1455127_at            | 0.8372  |
| TAF2    | UTP23                 | 1457351_at   | 1455259_a_at          | 0.9760  |
| ZNF69   | UTP23                 | 1458274_at   | 1455259_a_at          | 0.8946  |
| TAF2    | 2700049P18RIK         | 1457351_at   | 1456163_at            | 0.9576  |
| ZNF69   | 2700049P18RIK         | 1458274_at   | 1456163_at            | 0.8914  |
| TAF2    | RTEL1                 | 1457351_at   | 1456729_x_at          | 0.8818  |
| ZNF69   | RTEL1                 | 1458274_at   | 1456729_x_at          | 0.8372  |
| TAF2    | BB053540              | 1457351_at   | 1456840_at            | 0.8462  |
| TAF2    | AV254764              | 1457351_at   | 1456951_at            | 0.8986  |
| TAF2    | ZNF69                 | 1457351_at   | 1458274_at            | 0.9100  |
| TAF2    | MTR                   | 1457351_at   | 1458532_at            | 0.9180  |
| TAF2    | RNF219                | 1457351_at   | 1458636_at            | 0.9749  |
| TAF2    | BB463474              | 1457351_at   | 1458902_at            | 0.8724  |
| TAF2    | 6530418L21RIK         | 1457351_at   | 1459051_at            | 0.8306  |
| TAF2    | AA763515              | 1457351_at   | 1460065_at            | 0.8081  |
| TAF2    | AFFX-DapX-5_at        | 1457351_at   | AFFX-DapX-5_at        | 0.8926  |
| TAF2    | AFFX-LysX-5_at        | 1457351_at   | AFFX-LysX-5_at        | 0.8680  |
| TAF2    | AFFX-r2-Bs-dap-5_at   | 1457351_at   | AFFX-r2-Bs-dap-5_at   | 0.8827  |
| TAF2    | AFFX-r2-Bs-lys-5_at   | 1457351_at   | AFFX-r2-Bs-lys-5_at   | 0.8870  |
| TAF2    | AFFX-r2-Bs-thr-5_s_at | 1457351_at   | AFFX-r2-Bs-thr-5_s_at | 0.8658  |
| TAF2    | AFFX-ThrX-5_at        | 1457351_at   | AFFX-ThrX-5_at        | 0.8649  |
| ZNF69   | MTR                   | 1458274_at   | 1458532_at            | 0.9121  |
| ZNF69   | RNF219                | 1458274_at   | 1458636_at            | 0.8698  |
| ITGB3BP | MPPED1                | 1420665_at   | 1433701_at            | -0.8018 |
| ETV5    | DMRTC1A               | 1420998_at   | 1429573_at            | -0.8194 |
| POU3F4  | DMRTC1A               | 1422164_at   | 1429573_at            | -0.8551 |
| TLE4    | DMRTC1A               | 1430384_at   | 1429573_at            | -0.8157 |
| NPAS3   | DMRTC1A               | 1450287_at   | 1429573_at            | -0.8901 |
| SOX11   | FAM107A               | 1436790_a_at | 1434203_at            | -0.8011 |
| SOX4    | FAM107A               | 1449370_at   | 1434203_at            | -0.8180 |
| NPAS3   | KALRN                 | 1450287_at   | 1436066_at            | -0.8013 |
| NPAS3   | AV293250              | 1450287_at   | 1442914_at            | -0.8086 |
