# Supplementary material
Source: PubMed Central journal article supplement (PMC4875420)

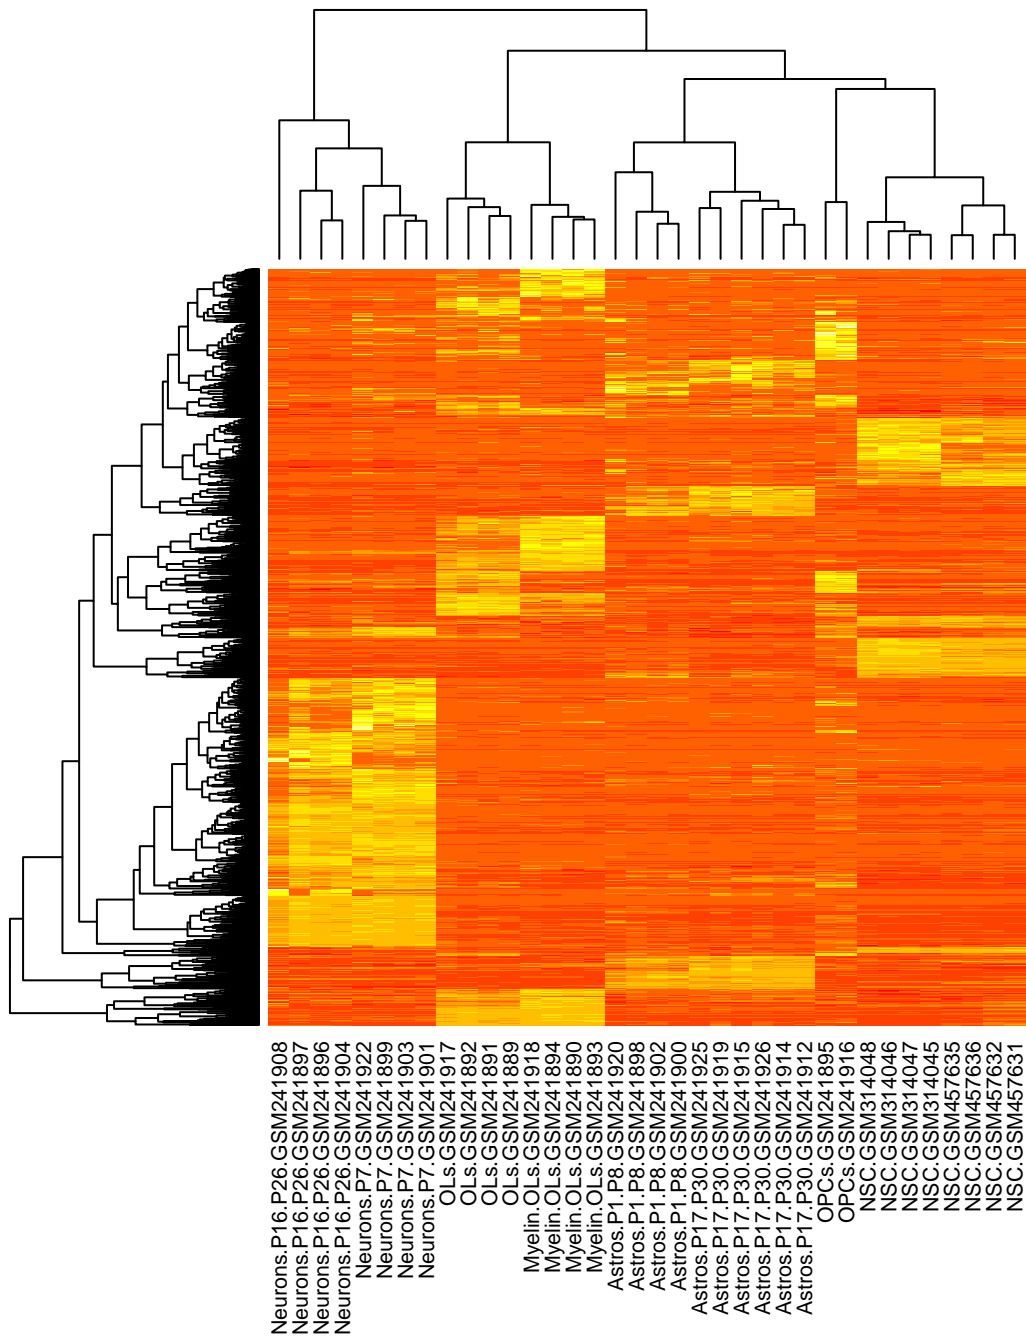

Supplement: 13238_2012_14_MOESM1_ESM.pdf [file 13238_2012_14_MOESM1_ESM.pdf]
